# Supplementary material for: Arginine GlcNAcylation and Activity Regulation of PhoP by a Type III Secretion System Effector in Salmonella
Source: Front Microbiol. 2022 Jan 20;12:825743. doi: 10.3389/fmicb.2021.825743 (PMC8811161; doi:10.3389/fmicb.2021.825743)
Supplement: Supplementary file 2 [file Table_1.XLSX]

## Sheet: GSE49829_counts
	OD0.1	OD0.3	OD0.3	OD0.3	OD0.3	OD1.0	OD2.0	OD2.0	OD2.0
	SRR951027	SRR951028	SRR951029	SRR951030	SRR951031	SRR951032	SRR951033	SRR951034	SRR951035
ADX15747-1	548	2989	474	532	449	799	2423	529	555
ADX15748-1	458	482	121	150	123	288	729	280	262
ADX15749-1	228	240	149	133	100	253	673	241	273
ADX15750-1	413	496	289	246	184	466	639	480	426
ADX15751-1	321	416	264	322	206	399	611	319	318
ADX15752-1	268	295	229	205	174	350	281	190	193
ADX15753-1	1753	1350	2210	2291	1755	3494	1124	1702	1689
ADX15754-1	369	308	190	194	157	344	586	308	346
ADX15755-1	1033	167	196	211	152	141	215	39	55
ADX15756-1	27	98	24	14	20	52	190	40	46
ADX15757-1	34	196	31	25	19	47	226	29	24
ADX15758-1	23	80	10	11	9	20	79	11	12
ADX15759-1	3956	3378	7293	7371	5656	1950	1946	1720	1797
ADX15760-1	1223	1032	1860	1857	1402	751	716	546	595
ADX15761-1	155	556	91	113	62	90	262	54	44
ADX15762-1	24	88	12	7	14	17	219	26	28
ADX15763-1	20	159	11	16	5	25	412	23	12
ADX15764-1	15	9	8	7	1	20	18	8	12
ADX15765-1	124	414	107	100	81	220	686	169	138
ADX15766-1	82	469	50	50	33	140	610	63	72
ADX15767-1	13	69	12	13	13	29	96	20	19
ADX15768-1	25	79	9	14	12	30	101	23	20
ADX15769-1	40	188	25	24	30	44	213	25	39
ADX15770-1	112	603	62	50	50	129	786	93	91
ADX15771-1	88	161	45	46	43	88	213	30	37
ADX15772-1	12	33	12	9	5	26	39	8	7
ADX15773-1	23	182	23	20	18	47	415	52	56
ADX15774-1	28	120	20	11	21	47	227	46	38
ADX15775-1	70	281	29	48	38	74	439	38	54
ADX15776-1	38	58	25	14	14	38	59	13	22
ADX15777-1	13	23	5	5	3	11	24	2	2
ADX15778-1	47	59	24	21	18	48	109	37	32
ADX15779-1	14	3	4	3	2	13	6	9	14
ADX15780-1	71	460	62	52	34	139	1163	107	130
ADX15781-1	149	702	104	87	61	225	1890	216	222
ADX15782-1	42	140	24	23	23	57	308	46	38
ADX15783-1	102	467	56	54	59	203	754	180	194
ADX15784-1	67	165	50	53	42	93	243	55	63
ADX15785-1	34	137	24	20	19	64	175	33	51
ADX15786-1	164	732	111	115	102	241	1538	191	215
ADX15787-1	667	546	295	332	222	1134	1148	692	626
ADX15788-1	569	451	287	236	196	794	688	368	422
ADX15789-1	80	428	67	63	39	164	293	74	49
ADX15790-1	24	99	16	20	18	76	186	41	51
ADX15791-1	23886	14299	11076	11199	8393	24819	8928	2617	2676
ADX15792-1	4333	11904	2484	2472	1929	3295	1528	397	387
ADX15793-1	1137	842	961	1017	792	1448	580	578	572
ADX15794-1	2399	2141	2196	2217	1828	2890	1676	1129	1145
ADX15795-1	822	457	784	782	613	978	348	467	499
ADX15796-1	524	219	351	357	284	413	70	152	124
ADX15797-1	827	454	611	590	483	783	339	318	314
ADX15798-1	237	469	163	165	137	288	700	146	147
ADX15799-1	182	394	116	119	84	226	232	129	127
ADX15800-1	74	88	57	65	46	174	111	103	78
ADX15801-1	235	1181	161	156	139	328	2551	307	325
ADX15802-1	15	21	12	9	6	18	15	17	8
ADX15803-1	0	4	0	0	0	1	2	0	0
ADX15804-1	1	2	2	2	0	8	2	2	2
ADX15805-1	23	132	12	18	13	47	256	43	32
ADX15806-1	35	145	18	18	19	28	115	24	10
ADX15807-1	1	3	3	1	1	11	2	3	0
ADX15808-1	8	24	11	3	4	21	33	8	9
ADX15809-1	27	242	27	25	16	59	104	24	17
ADX15810-1	5	16	5	2	5	10	24	5	7
ADX15811-1	21	172	20	11	7	32	302	11	17
ADX15812-1	220	359	206	209	158	467	543	502	499
ADX15813-1	30	44	35	20	15	192	231	153	171
ADX15814-1	173	115	177	154	113	123	197	320	316
ADX15815-1	338	654	438	410	384	405	819	535	480
ADX15816-1	44	93	45	30	23	48	266	125	113
ADX15817-1	26	151	14	14	10	32	252	37	39
ADX15818-1	6	20	11	8	4	29	26	21	16
ADX15819-1	61	299	47	49	29	91	311	60	67
ADX15820-1	30	145	24	20	16	69	407	104	87
ADX15821-1	15	65	6	10	4	31	59	14	7
ADX15822-1	1	2	2	0	0	2	10	0	0
ADX15823-1	8	47	7	12	4	23	41	11	15
ADX15824-1	7	27	4	3	3	15	59	10	7
ADX15825-1	13	52	5	8	11	27	60	12	19
ADX15826-1	4	7	2	2	1	8	11	7	3
ADX15827-1	2	2	3	2	0	2	15	3	4
ADX15828-1	80	441	55	63	42	108	483	66	54
ADX15829-1	34	119	42	27	13	149	305	153	164
ADX15830-1	27	197	24	27	15	62	599	99	86
ADX15831-1	43	218	20	26	14	60	123	87	91
ADX15832-1	179	599	103	91	81	166	737	115	121
ADX15833-1	44	53	26	32	20	117	145	133	131
ADX15834-1	70	92	52	65	51	195	189	175	170
ADX15835-1	461	284	361	315	267	647	182	304	266
ADX15836-1	414	512	292	266	217	497	1756	347	384
ADX15837-1	451	189	273	264	202	290	611	185	172
ADX15838-1	750	851	668	651	493	987	1590	606	574
ADX15839-1	1228	6624	1111	1020	829	1850	10493	1054	1081
ADX15840-1	1257	718	1047	1004	785	1475	699	772	778
ADX15841-1	2009	2088	1592	1547	1268	2513	1996	1401	1426
ADX15842-1	356	193	266	268	221	447	223	309	295
ADX15843-1	561	223	210	238	164	281	193	111	116
ADX15844-1	1203	414	361	384	281	672	374	236	247
ADX15845-1	282	885	181	203	166	335	1681	230	202
ADX15846-1	71	337	48	49	31	132	499	72	80
ADX15847-1	16	36	15	7	9	17	58	9	6
ADX15848-1	15	140	10	15	12	54	4046	93	127
ADX15849-1	6	97	8	9	13	63	195	30	29
ADX15850-1	62	251	44	36	24	94	407	78	69
ADX15851-1	70	165	65	59	39	193	238	147	181
ADX15852-1	330	380	168	153	127	316	141	91	119
ADX15853-1	157	153	115	125	88	145	138	88	74
ADX15854-1	306	233	208	222	187	224	143	103	100
ADX15855-1	204	110	177	175	141	260	147	96	111
ADX15856-1	3176	432472	12061	11625	9494	17326	473729	9336	8274
ADX15857-1	127	583	101	110	85	208	970	145	147
ADX15858-1	0	0	0	0	0	0	0	0	0
ADX15859-1	21	302	14	20	11	40	673	30	22
ADX15860-1	38	34	13	21	13	59	76	28	34
ADX15861-1	54	93	35	30	25	69	110	46	50
ADX15862-1	64	165	53	36	34	92	239	65	70
ADX15863-1	42	108	22	15	16	82	170	35	26
ADX15864-1	177	718	215	223	173	732	4165	1284	1273
ADX15865-1	10	49	6	2	4	23	153	17	15
ADX15866-1	105	399	90	91	81	197	517	191	147
ADX15867-1	72	379	74	66	51	149	1018	101	94
ADX15868-1	278	258	252	269	208	719	450	675	687
ADX15869-1	1271	2736	820	837	664	1519	2581	669	648
ADX15870-1	1395	610	973	955	729	1714	645	772	772
ADX15871-1	395	244	269	295	242	460	404	383	437
ADX15872-1	2117	797	1730	1777	1334	3477	1120	3110	3357
ADX15873-1	1332	812	984	936	802	1435	560	724	711
ADX15874-1	1064	489	794	821	645	1093	452	541	493
ADX15875-1	807	424	575	603	490	903	345	480	483
ADX15876-1	1123	707	863	869	716	1331	633	868	849
ADX15877-1	841	663	551	583	469	916	650	355	382
ADX15878-1	836	658	635	626	525	1076	786	683	679
ADX15879-1	1103	688	786	770	666	1410	1833	669	662
ADX15880-1	971	1251	765	799	659	1492	2034	1610	1603
ADX15881-1	849	407	628	675	479	1181	521	764	754
ADX15882-1	1873	812	1334	1390	1021	2382	1044	1343	1416
ADX15883-1	1270	725	1114	1030	850	2034	776	1269	1234
ADX15884-1	3834	2144	2631	2702	2115	4633	1581	2508	2657
ADX15885-1	632	172	414	375	305	391	201	216	211
ADX15886-1	2705	1391	1836	1869	1483	2132	954	937	917
ADX15887-1	84	50	109	78	60	210	60	102	79
ADX15888-1	115	84	75	101	65	97	56	55	40
ADX15889-1	292	234	248	266	202	345	252	181	184
ADX15890-1	342	521	290	342	258	452	289	176	194
ADX15891-1	939	807	478	440	353	1220	886	493	484
ADX15892-1	55	68	19	17	11	43	78	7	12
ADX15893-1	14	134	14	16	8	37	350	26	21
ADX15894-1	8	24	7	6	11	11	34	5	6
ADX15895-1	176	414	145	147	130	235	335	128	106
ADX15896-1	108	662	102	101	74	141	770	94	105
ADX15897-1	142	238	200	226	147	372	269	244	231
ADX15898-1	97	1034	80	75	67	140	1257	63	63
ADX15899-1	33	149	22	29	19	75	238	44	40
ADX15900-1	237	572	121	118	78	215	771	122	129
ADX15901-1	2122	1240	1964	1959	1635	399	443	291	278
ADX15902-1	7570	5997	9967	10101	8053	1770	1063	1347	1295
ADX15903-1	6900	4899	9114	8954	7439	1868	963	1391	1476
ADX15904-1	5328	3314	6980	7018	5559	7794	1502	2998	3106
ADX15905-1	16	5	5	9	4	14	2	2	1
ADX15906-1	41	9	19	12	14	24	2	3	5
ADX15907-1	21	102	18	9	12	33	105	7	15
ADX15908-1	793	1238	1674	1736	1339	6610	1593	2387	2389
ADX15909-1	512	311	672	700	510	1721	556	671	716
ADX15910-1	122	90	91	118	89	246	292	217	240
ADX15911-1	34	189	105	128	86	72	95	89	87
ADX15912-1	21	161	200	178	152	109	144	100	84
ADX15913-1	43	380	169	163	131	109	568	85	105
ADX15914-1	327	333	430	449	353	462	306	352	372
ADX15915-1	1370	193	574	543	472	710	107	146	140
ADX15916-1	954	858	386	377	301	568	550	171	147
ADX15917-1	305	1034	190	218	148	286	316	132	120
ADX15918-1	140	379	149	147	121	208	433	128	112
ADX15919-1	157	303	85	96	66	489	3986	522	569
ADX15920-1	1599	4530	1154	1185	814	1294	5304	519	523
ADX15921-1	1793	2363	1459	1498	1056	1426	700	479	483
ADX15922-1	210	325	141	136	118	255	364	126	121
ADX15923-1	147	88	76	62	52	155	140	77	75
ADX15924-1	91	160	57	59	40	118	187	86	78
ADX15925-1	40	175	27	32	23	86	267	34	40
ADX15926-1	9	50	4	4	7	20	47	12	8
ADX15927-1	25	119	25	15	16	48	226	43	53
ADX15928-1	41	232	17	25	18	54	1644	90	87
ADX15929-1	303	1132	205	230	157	380	693	148	132
ADX15930-1	448	165	462	422	328	612	182	367	381
ADX15931-1	323	334	292	273	196	308	380	161	168
ADX15932-1	277	331	217	206	172	216	196	117	121
ADX15933-1	148	51	72	85	69	136	43	45	40
ADX15934-1	1950	706	1210	1219	877	2059	527	625	625
ADX15935-1	246	168	140	175	101	370	220	127	147
ADX15936-1	1538	3063	1602	1554	1216	3376	3760	1719	1701
ADX15937-1	213	538	217	209	172	430	1029	380	412
ADX15938-1	178	498	141	147	111	212	442	207	183
ADX15939-1	630	884	483	501	386	769	1119	473	463
ADX15940-1	1206	1256	875	873	694	1692	2225	983	926
ADX15941-1	3144	907	1556	1536	1136	135	806	133	122
ADX15942-1	479	192	259	277	221	29	38	11	9
ADX15943-1	544	720	329	339	251	37	247	24	15
ADX15944-1	899	770	582	562	472	94	217	52	44
ADX15945-1	10	24	5	11	9	21	36	14	14
ADX15946-1	53	399	36	42	24	110	727	73	70
ADX15947-1	7	28	4	6	2	14	70	7	5
ADX15948-1	3	10	2	1	3	4	23	3	5
ADX15949-1	5	40	6	6	7	11	59	12	15
ADX15950-1	8	12	1	5	3	8	13	2	2
ADX15951-1	103	827	82	105	71	222	1687	266	232
ADX15952-1	701	1055	598	620	437	865	940	404	406
ADX15953-1	188	1206	188	182	169	625	1955	517	444
ADX15954-1	2728	6749	1685	1871	1416	1759	919	533	497
ADX15955-1	367	302	198	230	181	285	421	123	103
ADX15956-1	235	369	120	124	87	240	544	84	102
ADX15957-1	340	353	233	210	164	359	428	183	178
ADX15958-1	222	676	167	157	136	371	1660	306	331
ADX15959-1	363	446	357	383	254	849	1069	639	677
ADX15960-1	65	200	52	56	44	336	450	154	186
ADX15961-1	317	1072	603	613	467	2666	7879	4362	4540
ADX15962-1	268	792	193	167	136	473	2269	399	420
ADX15963-1	513	512	688	654	551	936	592	589	634
ADX15964-1	474	365	380	408	307	468	370	206	210
ADX15965-1	721	946	508	556	383	641	900	350	362
ADX15966-1	12779	2786	7294	7295	5664	10307	1038	2413	2488
ADX15967-1	10261	2938	5955	5913	4656	7274	1332	2508	2593
ADX15968-1	1925	764	1134	1152	855	1499	717	363	402
ADX15969-1	3386	1016	2494	2493	1965	3656	964	1488	1606
ADX15970-1	728	354	386	477	302	709	401	239	240
ADX15971-1	1614	396	743	715	542	1375	489	408	388
ADX15972-1	1044	2587	507	481	324	884	2514	356	389
ADX15973-1	2668	2744	1609	1703	1213	2832	2177	1398	1405
ADX15974-1	5387	2399	4193	4243	3249	6272	1864	2580	2627
ADX15975-1	3050	765	2778	2884	2283	2993	631	1369	1313
ADX15976-1	2676	5832	2036	2038	1528	2917	7897	1446	1441
ADX15977-1	1024	494	633	613	485	1174	500	487	540
ADX15978-1	1449	673	775	794	627	1443	1483	619	643
ADX15979-1	1089	456	642	609	486	1022	389	611	596
ADX15980-1	544	207	261	277	213	415	263	288	270
ADX15981-1	3388	4293	1716	1653	1371	3050	2655	1009	970
ADX15982-1	1101	426	683	757	579	1393	392	617	595
ADX15983-1	258	834	139	159	135	319	1185	177	201
ADX15984-1	315	684	283	299	217	531	732	303	313
ADX15985-1	87	289	95	96	76	188	294	105	112
ADX15986-1	368	670	303	273	223	412	646	204	225
ADX15987-1	261	351	377	400	266	649	484	864	906
ADX15988-1	224	808	302	290	216	584	2463	629	693
ADX15989-1	186	349	103	116	85	179	132	104	100
ADX15990-1	165	423	168	142	128	232	718	231	224
ADX15991-1	244	141	192	146	152	298	161	144	182
ADX15992-1	1347	713	1108	1076	877	1423	410	525	493
ADX15993-1	333	290	276	248	212	363	272	218	195
ADX15994-1	365	519	261	251	194	441	436	231	227
ADX15995-1	725	1080	519	533	384	1099	1444	772	815
ADX15996-1	225	455	138	115	89	243	788	112	124
ADX15997-1	403	686	158	192	144	368	603	165	165
ADX15998-1	316	344	263	277	224	340	280	180	213
ADX15999-1	2039	2204	1830	1799	1436	1515	1268	269	223
ADX16000-1	269	130	84	105	81	137	139	68	62
ADX16001-1	80	58	36	40	21	43	159	38	43
ADX16002-1	29	107	15	18	22	43	188	17	13
ADX16003-1	143	146	182	187	140	202	220	176	162
ADX16004-1	102	151	79	95	61	101	142	55	46
ADX16005-1	2492	4833	1537	1542	1195	3994	5063	1998	2055
ADX16006-1	162	526	104	141	94	223	1010	211	211
ADX16007-1	180	431	122	127	108	243	785	198	168
ADX16008-1	226	483	148	184	141	269	237	93	104
ADX16009-1	309	425	205	220	164	342	720	285	292
ADX16010-1	166	68	23	30	13	58	52	18	15
ADX16011-1	17	37	17	11	10	19	71	13	14
ADX16012-1	33	104	30	32	24	73	95	31	40
ADX16013-1	14	83	20	13	8	25	168	11	24
ADX16014-1	20	144	19	25	20	45	195	34	31
ADX16015-1	15	50	5	4	6	31	55	11	9
ADX16016-1	66	137	30	28	34	96	104	36	39
ADX16017-1	9	13	5	2	2	25	18	7	10
ADX16018-1	24	134	13	23	14	42	114	24	19
ADX16019-1	7	59	8	7	6	16	98	14	20
ADX16020-1	9	15	6	7	4	21	49	12	13
ADX16021-1	8	8	2	5	4	6	27	6	3
ADX16022-1	31	88	18	17	5	27	172	21	16
ADX16023-1	13	23	6	2	9	16	88	6	5
ADX16024-1	8	21	1	4	4	8	34	6	8
ADX16025-1	11	15	4	1	1	12	31	5	6
ADX16026-1	12	25	5	7	9	28	136	18	7
ADX16027-1	25	120	16	19	18	35	90	8	13
ADX16028-1	34	103	13	12	10	37	182	14	18
ADX16029-1	12	25	5	6	4	23	74	11	13
ADX16030-1	67	267	59	58	36	185	488	92	114
ADX16031-1	14	25	3	6	3	17	14	11	5
ADX16032-1	26	232	16	26	25	44	320	26	35
ADX16033-1	20	113	31	24	14	32	217	30	32
ADX16034-1	52	96	29	45	31	89	180	43	47
ADX16035-1	31	191	18	20	14	31	218	9	11
ADX16036-1	255	569	197	182	145	610	1092	352	342
ADX16037-1	220	859	167	152	114	403	1485	297	293
ADX16038-1	86	60	63	70	39	150	88	86	111
ADX16039-1	56	4	8	14	11	25	7	7	8
ADX16040-1	1	2	0	0	0	0	2	0	0
ADX16041-1	29	22	13	14	8	31	63	15	12
ADX16042-1	2	0	0	1	0	5	0	3	1
ADX16043-1	8	75	4	7	4	17	187	14	9
ADX16044-1	0	4	0	1	1	6	8	0	1
ADX16045-1	6	4	3	2	1	3	5	3	3
ADX16046-1	48	76	23	27	14	65	352	61	85
ADX16047-1	64	175	45	34	41	99	190	52	61
ADX16048-1	106	307	63	88	73	178	367	152	144
ADX16049-1	28	71	16	25	24	45	70	27	23
ADX16050-1	34	71	20	19	7	56	138	37	36
ADX16051-1	8	67	6	3	3	6	169	15	10
ADX16052-1	164	93	90	121	81	754	538	686	754
ADX16053-1	32	194	23	25	14	88	185	67	66
ADX16054-1	99	324	68	66	60	383	2480	631	603
ADX16055-1	64	116	50	65	40	98	238	56	67
ADX16056-1	101	367	95	87	65	167	368	145	162
ADX16057-1	120	607	96	97	83	744	1650	461	464
ADX16058-1	421	885	363	379	317	553	867	358	336
ADX16059-1	316	217	236	238	186	429	309	222	210
ADX16060-1	476	505	287	292	235	815	930	313	345
ADX16061-1	164	1236	155	142	106	220	1379	96	108
ADX16062-1	55	20	35	29	21	68	32	32	37
ADX16063-1	807	818	1014	1008	785	1385	812	856	944
ADX16064-1	779	330	665	662	531	726	396	294	276
ADX16065-1	450	830	391	366	275	552	1168	442	458
ADX16066-1	720	2580	820	800	601	1175	1727	708	672
ADX16067-1	134	493	98	98	80	169	505	95	108
ADX16068-1	27	68	15	19	14	27	60	13	16
ADX16069-1	339	422	247	266	219	458	500	295	296
ADX16070-1	403	366	331	352	240	505	503	344	353
ADX16071-1	16	20	9	10	5	21	31	12	7
ADX16072-1	50	252	151	161	99	910	2163	1260	1305
ADX16073-1	18	62	7	7	6	33	132	17	22
ADX16074-1	17	156	20	9	11	26	244	17	20
ADX16075-1	16	80	18	10	11	53	156	31	22
ADX16076-1	41	274	28	38	34	69	614	65	51
ADX16077-1	85	256	75	66	48	112	377	136	117
ADX16078-1	17	39	9	11	7	30	103	27	28
ADX16079-1	23	64	10	6	10	30	259	27	32
ADX16080-1	66	166	40	31	21	85	328	59	48
ADX16081-1	74	414	57	48	38	104	361	58	43
ADX16082-1	112	839	95	103	68	181	1196	115	128
ADX16083-1	3	23	1	6	5	6	54	6	8
ADX16084-1	5	7	2	3	3	8	20	2	1
ADX16085-1	142	324	117	103	88	496	568	250	256
ADX16086-1	84	413	72	76	57	179	1121	192	186
ADX16087-1	331	993	222	219	169	332	1345	319	309
ADX16088-1	116	33	82	86	76	164	62	98	117
ADX16089-1	24	19	7	10	7	20	42	9	9
ADX16090-1	38	38	18	12	14	29	73	15	7
ADX16091-1	36	161	17	15	10	26	584	35	42
ADX16092-1	28	49	8	25	13	40	90	27	23
ADX16093-1	22	107	22	11	8	49	191	26	19
ADX16094-1	48	394	49	42	41	99	489	58	53
ADX16095-1	4	21	3	0	1	11	32	6	7
ADX16096-1	20	91	25	20	22	60	186	31	29
ADX16097-1	25	173	26	17	19	79	345	33	46
ADX16098-1	18	22	21	16	16	83	73	51	60
ADX16099-1	61	298	34	40	42	287	504	81	81
ADX16100-1	924	704	671	710	503	815	846	304	349
ADX16101-1	987	565	724	767	549	993	672	339	363
ADX16102-1	22	22	14	9	6	53	69	119	122
ADX16103-1	47	119	22	22	19	151	487	219	212
ADX16104-1	52	277	30	51	36	199	1203	336	290
ADX16105-1	0	0	0	0	0	0	0	0	0
ADX16106-1	9	8	6	8	7	11	6	12	20
ADX16107-1	165	577	134	100	105	94	479	64	58
ADX16108-1	103	370	71	74	61	122	573	101	79
ADX16109-1	80	543	63	76	71	306	2551	286	270
ADX16110-1	19	48	17	31	24	315	478	824	825
ADX16111-1	44	275	106	85	74	386	301	192	165
ADX16112-1	12	39	14	7	13	74	72	45	33
ADX16113-1	27	127	14	24	18	59	250	52	57
ADX16114-1	24	98	20	15	11	71	245	55	49
ADX16115-1	42	99	30	32	30	88	166	60	65
ADX16116-1	346	444	297	294	271	375	229	192	190
ADX16117-1	309	834	206	191	130	585	2333	499	513
ADX16118-1	57	94	31	36	28	110	384	80	98
ADX16119-1	203	413	106	129	93	257	638	156	165
ADX16120-1	200	278	110	138	85	209	392	167	148
ADX16121-1	137	155	99	112	87	161	174	132	140
ADX16122-1	22	56	20	13	14	50	149	39	44
ADX16123-1	137	911	138	120	101	538	2945	368	358
ADX16124-1	357	670	362	372	266	601	820	328	312
ADX16125-1	19	91	12	22	5	52	148	63	58
ADX16126-1	60	154	46	51	32	89	334	52	51
ADX16127-1	164	97	187	203	134	949	871	1261	1308
ADX16128-1	75	74	75	69	71	323	313	267	300
ADX16129-1	22	15	15	21	16	196	188	472	468
ADX16130-1	70	401	78	74	59	191	443	143	172
ADX16131-1	153	452	118	109	93	227	561	172	149
ADX16132-1	6	49	2	3	9	11	124	10	9
ADX16133-1	45	52	41	40	24	56	67	29	23
ADX16134-1	256	292	138	162	140	214	237	113	117
ADX16135-1	155	152	112	95	81	294	1028	339	378
ADX16136-1	193	261	122	108	92	240	512	142	189
ADX16137-1	224	525	172	186	132	344	604	260	257
ADX16138-1	462	738	362	411	295	534	448	255	234
ADX16139-1	92	202	94	79	75	193	462	154	157
ADX16140-1	176	398	127	119	96	203	412	97	106
ADX16141-1	410	375	325	285	258	416	275	177	176
ADX16142-1	223	328	146	168	127	215	302	70	90
ADX16143-1	9	27	13	14	8	17	115	21	27
ADX16144-1	329	1051	284	286	243	462	595	266	275
ADX16145-1	257	211	231	197	168	346	269	202	173
ADX16146-1	132	420	69	69	56	100	175	38	27
ADX16147-1	1233	5102	766	817	607	1271	5177	519	508
ADX16148-1	731	468	251	261	228	516	669	198	178
ADX16149-1	201	460	123	117	116	161	623	97	91
ADX16150-1	1781	3262	1441	1453	1058	1904	1325	968	1090
ADX16151-1	224	3873	216	224	189	370	7934	363	347
ADX16152-1	998	2491	442	433	386	637	1572	137	135
ADX16153-1	2088	3894	1146	1186	895	1923	8179	737	694
ADX16154-1	1450	310	1005	991	749	1404	291	783	752
ADX16155-1	3849	2345	2455	2424	1836	4087	2037	1701	1716
ADX16156-1	1450	677	806	895	675	1360	364	420	418
ADX16157-1	69	30	42	32	31	80	71	34	29
ADX16158-1	75	105	37	37	26	77	176	35	47
ADX16159-1	187	181	124	136	109	194	275	165	175
ADX16160-1	183	113	173	165	133	534	278	483	493
ADX16161-1	794	1130	2062	2096	1679	957	583	667	717
ADX16162-1	28	31	24	17	11	82	85	53	65
ADX16163-1	8	48	6	7	7	10	70	11	10
ADX16164-1	306	1133	311	281	228	450	1150	286	278
ADX16165-1	506	466	522	483	394	808	499	465	422
ADX16166-1	1486	2897	827	768	641	1275	1527	434	407
ADX16167-1	1491	642	1071	1123	850	1710	390	913	913
ADX16168-1	732	258	349	319	248	506	266	202	187
ADX16169-1	346	142	116	138	97	226	202	116	109
ADX16170-1	230	113	160	152	95	267	295	224	198
ADX16171-1	874	533	667	668	552	1109	640	490	544
ADX16172-1	491	907	381	430	304	612	1011	360	328
ADX16173-1	211	437	134	158	116	356	534	224	212
ADX16174-1	781	668	558	533	422	658	722	224	204
ADX16175-1	77	95	46	47	26	60	144	26	22
ADX16176-1	20	28	12	14	4	19	22	4	8
ADX16177-1	16	94	26	19	24	40	95	16	25
ADX16178-1	49	352	33	36	35	57	277	33	43
ADX16179-1	72	93	53	47	45	71	102	55	64
ADX16180-1	13	57	9	6	5	26	81	14	12
ADX16181-1	14	25	15	18	14	22	18	12	6
ADX16182-1	98	81	98	92	88	152	112	134	134
ADX16183-1	171	435	153	171	111	259	870	190	201
ADX16184-1	1494	1355	1375	1290	924	987	702	735	717
ADX16185-1	416	946	350	378	297	550	1026	336	294
ADX16186-1	148	479	73	92	64	179	938	129	111
ADX16187-1	327	366	169	193	147	357	408	122	145
ADX16188-1	2814	1684	3455	3304	2624	7074	952	2288	2332
ADX16189-1	734	393	700	707	560	1483	369	540	547
ADX16190-1	1539	711	1429	1440	1145	2825	322	680	691
ADX16191-1	5053	2890	5104	5163	3950	10398	1230	2613	2584
ADX16192-1	5025	5643	4535	4614	3589	9953	6126	3328	3464
ADX16193-1	35	18	16	24	15	48	23	32	27
ADX16194-1	575	437	385	369	270	495	323	172	160
ADX16195-1	441	548	332	342	273	639	328	259	277
ADX16196-1	522	1660	406	434	306	833	6464	1357	1359
ADX16197-1	7786	3087	6302	6159	4911	8013	1485	3049	2975
ADX16198-1	911	1520	955	912	667	1382	2402	1193	1235
ADX16199-1	2810	1657	3054	3035	2428	4215	1496	2973	3015
ADX16200-1	3237	2796	4609	4737	3787	2682	1402	1784	1782
ADX16201-1	1053	390	1590	1686	1261	3352	1110	3580	3809
ADX16202-1	2129	854	1418	1408	1087	2531	728	979	967
ADX16203-1	27	24	15	17	10	25	34	19	20
ADX16204-1	101	90	73	56	54	114	147	71	83
ADX16205-1	354	607	222	229	203	373	522	200	208
ADX16206-1	68	300	80	65	61	142	546	130	131
ADX16207-1	86	101	61	65	48	137	114	94	91
ADX16208-1	83	708	81	73	56	164	778	66	85
ADX16209-1	140	501	92	123	80	202	735	158	182
ADX16210-1	375	262	206	209	185	409	312	247	218
ADX16211-1	304	494	178	186	153	337	603	205	201
ADX16212-1	10	14	24	29	31	3	7	3	1
ADX16213-1	61	295	167	144	118	95	314	71	72
ADX16214-1	191	283	149	149	141	256	327	152	152
ADX16215-1	64	80	84	89	77	659	411	674	669
ADX16216-1	127	560	125	108	88	299	1058	264	280
ADX16217-1	403	1143	290	342	265	552	945	287	302
ADX16218-1	88	45	33	33	31	87	161	69	55
ADX16219-1	88	75	42	52	35	146	202	95	117
ADX16220-1	373	1143	174	180	125	742	2795	484	471
ADX16221-1	649	1366	391	423	313	593	2540	408	387
ADX16222-1	755	236	444	439	327	402	343	266	300
ADX16223-1	1074	1976	657	687	502	776	1394	766	845
ADX16224-1	2958	1506	1932	1916	1510	3133	1168	1526	1479
ADX16225-1	1169	906	706	688	589	1229	1014	683	671
ADX16226-1	625	1220	517	473	345	911	3207	806	817
ADX16227-1	1230	954	729	686	534	1185	986	475	486
ADX16228-1	213	412	148	168	123	268	554	246	187
ADX16229-1	30	92	23	24	18	40	120	20	31
ADX16230-1	72	91	53	49	39	67	441	58	75
ADX16231-1	187	913	110	132	94	98	555	44	42
ADX16232-1	804	301	314	287	213	565	641	210	233
ADX16233-1	2363	3647	1456	1407	1154	2045	3087	1178	1186
ADX16234-1	334	159	225	192	167	286	158	174	131
ADX16235-1	944	1627	848	879	737	985	849	341	363
ADX16236-1	3147	3884	7450	7464	5740	1457	1420	1103	1052
ADX16237-1	896	2831	718	756	579	1492	1836	426	415
ADX16238-1	102	81	128	138	101	285	92	195	232
ADX16239-1	132	212	145	125	108	257	184	143	140
ADX16240-1	70	51	72	70	57	127	76	89	81
ADX16241-1	621	843	377	343	303	484	794	152	193
ADX16242-1	689	1812	526	494	391	915	3518	1206	1209
ADX16243-1	161	170	86	94	74	156	277	78	98
ADX16244-1	410	1011	415	436	295	1300	1807	1021	1081
ADX16245-1	284	250	246	265	190	436	261	386	378
ADX16246-1	199	747	124	146	111	223	469	106	108
ADX16247-1	59	351	59	57	43	97	508	54	73
ADX16248-1	242	355	314	313	272	345	443	356	373
ADX16249-1	125	133	124	126	101	205	202	239	230
ADX16250-1	67	178	56	76	36	128	134	90	98
ADX16251-1	110	193	111	96	80	254	292	163	192
ADX16252-1	98	183	69	70	58	94	226	69	67
ADX16253-1	128	183	139	133	105	192	447	128	114
ADX16254-1	366	690	683	697	554	331	596	260	292
ADX16255-1	139	104	115	105	97	197	174	143	135
ADX16256-1	160	751	116	121	112	244	604	168	184
ADX16257-1	22	34	17	21	16	72	81	41	45
ADX16258-1	127	202	130	114	95	418	619	394	399
ADX16259-1	192	1086	184	170	121	240	922	188	182
ADX16260-1	54	123	44	61	40	78	154	61	49
ADX16261-1	49	107	44	52	56	77	157	56	51
ADX16262-1	49	152	53	63	43	80	488	71	93
ADX16263-1	208	292	189	195	153	280	601	240	259
ADX16264-1	41	145	42	21	20	63	235	55	38
ADX16265-1	47	144	37	43	31	88	207	120	128
ADX16266-1	153	296	139	155	131	278	596	269	264
ADX16267-1	25	107	18	24	20	44	78	27	49
ADX16268-1	20	94	17	8	11	43	259	44	40
ADX16269-1	13	84	12	16	8	39	138	29	30
ADX16270-1	15	65	16	16	7	29	504	41	39
ADX16271-1	0	0	0	0	0	0	1	0	0
ADX16272-1	3	29	2	6	1	23	82	13	20
ADX16273-1	13	52	11	5	7	38	140	37	49
ADX16274-1	17	101	17	11	20	32	233	27	24
ADX16275-1	8	59	9	10	13	26	110	16	14
ADX16276-1	55	225	53	46	39	125	977	114	118
ADX16277-1	6	60	9	9	10	37	84	43	37
ADX16278-1	24	133	15	22	17	62	310	31	43
ADX16279-1	10	42	16	12	8	34	389	64	41
ADX16280-1	8	19	5	2	5	16	30	10	3
ADX16281-1	5	10	4	8	3	18	11	8	8
ADX16282-1	33	469	40	22	26	48	629	26	31
ADX16283-1	241	692	305	301	263	328	1733	406	388
ADX16284-1	138	647	163	150	108	166	341	196	157
ADX16285-1	256	460	278	233	179	375	801	178	184
ADX16286-1	2295	2093	1882	1911	1451	2235	1027	1165	1246
ADX16287-1	1027	1513	872	836	616	1185	1055	491	546
ADX16288-1	92	107	64	62	53	85	99	48	45
ADX16289-1	20	88	15	13	9	30	81	13	17
ADX16290-1	17	45	31	17	17	30	60	10	9
ADX16291-1	99	97	115	136	95	162	126	169	175
ADX16292-1	526	1559	474	486	391	569	1562	398	398
ADX16293-1	31	158	17	14	15	57	470	106	105
ADX16294-1	8	26	4	2	5	27	30	13	12
ADX16295-1	6	14	3	0	3	11	50	6	14
ADX16296-1	28	131	29	30	21	77	232	39	50
ADX16297-1	29	189	29	24	22	45	219	35	33
ADX16298-1	37	184	40	25	20	85	353	74	76
ADX16299-1	16	75	13	11	15	55	276	37	40
ADX16300-1	41	179	21	20	17	76	176	48	48
ADX16301-1	16	67	7	13	6	20	52	9	10
ADX16302-1	39	211	21	23	20	39	431	49	52
ADX16303-1	145	34	58	67	32	167	25	21	17
ADX16304-1	177	587	1784	1845	1337	388	209	58	74
ADX16305-1	144	368	867	809	605	165	294	57	70
ADX16306-1	79	2654	479	492	338	132	67	16	22
ADX16307-1	66	175	39	43	31	122	214	66	91
ADX16308-1	27	9	22	16	16	59	31	61	59
ADX16309-1	53	53	35	31	34	63	87	59	44
ADX16310-1	51	235	36	35	25	78	538	56	60
ADX16311-1	10	79	7	7	7	17	126	12	5
ADX16312-1	31	22	20	19	18	51	44	9	14
ADX16313-1	349	207	315	331	268	597	269	404	440
ADX16314-1	1233	1329	593	672	505	829	1779	434	426
ADX16315-1	422	806	203	204	181	390	1603	272	271
ADX16316-1	82	393	74	74	69	231	1003	268	277
ADX16317-1	124	523	106	126	97	376	1443	373	368
ADX16318-1	34	121	13	22	12	44	127	22	25
ADX16319-1	22	106	9	14	8	16	72	8	9
ADX16320-1	14	13	9	5	3	14	26	4	7
ADX16321-1	8	29	3	4	6	13	67	9	4
ADX16322-1	2	13	1	0	2	6	84	0	6
ADX16323-1	10	68	6	7	2	8	70	8	8
ADX16324-1	201	194	189	171	149	251	226	214	213
ADX16325-1	36	24	25	38	32	53	34	41	50
ADX16326-1	110	331	100	89	64	185	479	145	146
ADX16327-1	78	215	43	50	31	106	166	57	69
ADX16328-1	53	117	34	40	27	97	124	45	64
ADX16329-1	52	88	21	18	20	73	112	65	55
ADX16330-1	61	101	29	30	20	52	155	40	42
ADX16331-1	358	245	144	150	90	102	445	74	59
ADX16332-1	497	176	123	121	100	12	31	1	7
ADX16333-1	43	17	16	26	21	3	2	4	0
ADX16334-1	582	420	277	251	225	105	505	62	60
ADX16335-1	444	981	256	233	169	316	1340	192	199
ADX16336-1	262	316	153	151	119	69	292	38	31
ADX16337-1	223	230	131	125	106	26	101	23	15
ADX16338-1	467	1031	269	233	154	31	73	9	11
ADX16339-1	548	867	268	235	175	45	187	31	33
ADX16340-1	383	266	173	138	106	60	204	47	40
ADX16341-1	243	162	92	94	70	27	120	14	11
ADX16342-1	310	227	161	148	112	51	145	29	28
ADX16343-1	86	77	50	36	41	25	66	11	9
ADX16344-1	108	112	57	57	44	27	57	16	18
ADX16345-1	65	42	29	19	25	9	14	9	7
ADX16346-1	296	574	250	256	217	3132	8033	3716	3872
ADX16347-1	27	40	31	28	31	180	115	238	222
ADX16348-1	68	148	46	63	47	262	343	255	275
ADX16349-1	85	151	60	66	47	111	182	76	95
ADX16350-1	44	173	51	36	32	71	317	90	94
ADX16351-1	120	436	84	68	63	188	648	143	166
ADX16352-1	116	139	89	60	54	167	193	132	142
ADX16353-1	154	2015	115	124	77	396	4882	284	267
ADX16354-1	1544	1414	1493	1552	1194	1658	785	1063	1126
ADX16355-1	638	437	546	636	453	656	668	381	409
ADX16356-1	9	40	9	6	4	17	35	3	3
ADX16357-1	41	160	21	30	35	64	403	31	34
ADX16358-1	10	35	15	9	9	27	42	11	16
ADX16359-1	76	338	70	75	60	139	868	142	147
ADX16360-1	193	167	199	207	157	563	418	550	578
ADX16361-1	25	135	29	18	14	25	219	31	15
ADX16362-1	33	50	23	21	19	50	211	68	57
ADX16363-1	158	63	100	97	79	412	239	214	218
ADX16364-1	367	477	289	307	206	564	806	468	470
ADX16365-1	86	573	66	63	52	133	768	57	47
ADX16366-1	12	38	16	6	9	41	95	26	37
ADX16367-1	0	3	1	1	2	1	3	4	6
ADX16368-1	2	22	3	3	4	18	28	7	4
ADX16369-1	28	150	21	17	14	44	91	21	16
ADX16370-1	0	3	1	2	2	5	11	1	1
ADX16371-1	7	54	5	7	6	26	118	11	12
ADX16372-1	37	124	24	27	27	119	208	75	86
ADX16373-1	41	264	33	35	21	73	505	70	70
ADX16374-1	81	267	46	45	22	99	1943	102	88
ADX16375-1	1044	543	504	462	374	629	517	304	320
ADX16376-1	7518	31759	10580	10995	8210	23538	22217	6772	6946
ADX16377-1	237	1253	198	191	136	239	2290	243	231
ADX16378-1	37	78	34	26	22	79	165	64	77
ADX16379-1	119	175	80	90	73	286	372	215	201
ADX16380-1	1011	623	1098	1122	905	1004	439	409	411
ADX16381-1	155	434	96	92	73	205	957	203	190
ADX16382-1	269	632	222	229	158	277	397	89	94
ADX16383-1	588	637	698	655	504	573	2009	519	560
ADX16384-1	1309	984	943	964	749	1552	422	447	413
ADX16385-1	486	256	363	386	279	559	232	282	276
ADX16386-1	451	687	301	245	200	474	632	165	168
ADX16387-1	1061	617	632	589	455	733	734	390	354
ADX16388-1	444	185	199	205	169	234	60	64	73
ADX16389-1	303	106	137	120	118	205	66	61	59
ADX16390-1	45	59	51	57	39	101	109	77	83
ADX16391-1	92	532	63	66	54	184	880	145	118
ADX16392-1	134	88	91	97	72	144	100	83	80
ADX16393-1	552	255	404	426	305	513	215	175	191
ADX16394-1	579	317	456	476	415	630	399	459	429
ADX16395-1	1852	2143	1378	1374	1112	2027	2314	958	906
ADX16396-1	6	8	2	0	2	9	14	2	2
ADX16397-1	29	136	28	24	19	55	207	22	30
ADX16398-1	66	1210	66	62	50	183	3349	172	197
ADX16399-1	281	1101	329	296	226	577	1764	479	495
ADX16400-1	67	296	104	87	65	453	3673	667	659
ADX16401-1	116	627	77	77	68	216	778	142	163
ADX16402-1	8	32	7	6	6	17	38	17	21
ADX16403-1	20	44	12	14	14	42	74	24	29
ADX16404-1	11	26	6	4	5	10	30	3	8
ADX16405-1	61	269	35	36	30	92	772	53	65
ADX16406-1	43	251	56	55	45	140	458	119	130
ADX16407-1	74	311	121	100	107	285	284	154	155
ADX16408-1	54	118	79	67	65	234	341	190	168
ADX16409-1	41	30	71	56	39	772	123	221	257
ADX16410-1	47	97	76	58	48	865	239	265	267
ADX16411-1	43	95	45	40	42	664	312	233	243
ADX16412-1	122	94	133	145	107	2456	592	1527	1541
ADX16413-1	710	541	556	555	425	583	798	394	426
ADX16414-1	772	554	722	725	540	750	654	533	503
ADX16415-1	383	659	419	421	349	422	459	374	375
ADX16416-1	528	571	797	785	624	670	921	662	709
ADX16417-1	1226	1607	742	756	591	986	700	333	323
ADX16418-1	165	205	138	139	122	266	317	228	251
ADX16419-1	98	654	91	98	94	170	1680	172	149
ADX16420-1	210	358	127	140	109	481	1228	496	550
ADX16421-1	310	294	204	253	186	409	293	209	207
ADX16422-1	400	1789	331	282	255	590	3690	388	368
ADX16423-1	412	1231	359	363	295	715	2322	418	383
ADX16424-1	211	710	210	178	162	393	1243	310	331
ADX16425-1	303	414	353	396	303	1088	590	713	747
ADX16426-1	1466	1744	1368	1365	1089	1578	923	613	645
ADX16427-1	53	83	50	48	48	902	372	627	619
ADX16428-1	20	71	27	27	12	255	228	266	236
ADX16429-1	48	300	48	51	30	215	458	177	185
ADX16430-1	12	32	6	5	11	37	37	20	16
ADX16431-1	32	116	38	17	22	96	320	58	64
ADX16432-1	82	321	134	114	87	166	522	118	88
ADX16433-1	1638	420	1057	1205	926	1937	567	978	1036
ADX16434-1	1932	1410	1239	1280	967	1283	1162	865	909
ADX16435-1	383	198	238	262	213	230	276	39	53
ADX16436-1	210	463	153	154	123	220	350	118	127
ADX16437-1	606	451	452	486	346	712	1206	526	481
ADX16438-1	1310	898	1137	1116	882	2051	1102	1041	1040
ADX16439-1	20	59	36	19	25	53	113	47	51
ADX16440-1	12	71	26	25	25	50	150	80	82
ADX16441-1	38	219	45	46	29	102	504	142	171
ADX16442-1	5	150	17	18	9	79	797	170	178
ADX16443-1	55	215	90	60	49	124	309	70	88
ADX16444-1	150	789	137	106	97	263	1379	176	185
ADX16445-1	18	79	13	16	13	27	125	19	20
ADX16446-1	26	189	20	16	13	46	226	43	18
ADX16447-1	13	55	5	13	7	18	133	15	7
ADX16448-1	0	2	1	4	0	0	4	4	1
ADX16449-1	52	54	43	38	32	97	134	125	106
ADX16450-1	134	534	89	97	64	242	1086	169	213
ADX16451-1	132	347	65	60	47	117	556	67	61
ADX16452-1	191	715	210	220	157	395	844	316	368
ADX16453-1	74	78	103	80	65	165	132	171	170
ADX16454-1	90	103	79	102	72	171	298	148	151
ADX16455-1	123	437	99	91	77	190	618	154	156
ADX16456-1	24	62	14	6	8	28	92	16	12
ADX16457-1	145	912	104	114	85	219	2001	222	241
ADX16458-1	8	5	4	1	4	16	5	1	1
ADX16459-1	9	25	3	3	4	17	38	3	10
ADX16460-1	10	28	8	6	3	13	33	7	7
ADX16461-1	11	12	5	5	5	20	26	11	17
ADX16462-1	20	65	11	17	7	29	137	20	24
ADX16463-1	15	6	6	8	3	12	9	8	6
ADX16464-1	63	149	29	40	21	81	88	37	31
ADX16465-1	15	32	7	9	8	15	35	5	9
ADX16466-1	51	82	15	27	23	69	160	56	38
ADX16467-1	47	221	22	20	26	57	390	29	40
ADX16468-1	131	104	84	104	67	178	112	89	106
ADX16469-1	76	84	62	74	53	279	206	113	111
ADX16470-1	500	453	813	863	674	6689	1171	2199	2202
ADX16471-1	579	846	593	567	449	6083	2622	2048	2199
ADX16472-1	229	181	241	241	180	2638	533	1221	1259
ADX16473-1	153	239	195	204	157	2199	664	929	868
ADX16474-1	512	831	1064	997	860	9453	2314	2976	2994
ADX16475-1	360	797	871	895	628	6208	1224	1872	1945
ADX16476-1	1008	3600	4737	4759	3758	19612	3753	5653	5818
ADX16477-1	440	1431	2479	2473	2020	9312	1869	3310	3258
ADX16478-1	390	1393	2037	2028	1635	7936	1797	2605	2551
ADX16479-1	405	1879	2176	2259	1756	10265	5097	5233	5392
ADX16480-1	2	15	1	5	1	21	9	2	0
ADX16481-1	157	3641	340	369	274	191	5301	612	648
ADX16482-1	896	630	1123	1095	872	1108	2087	4128	4260
ADX16483-1	558	492	507	525	418	610	1589	2160	2362
ADX16484-1	138	98	132	128	110	145	242	617	631
ADX16485-1	172	241	140	112	109	160	521	575	552
ADX16486-1	449	167	378	353	297	526	202	189	190
ADX16487-1	489	288	393	450	321	584	214	182	163
ADX16488-1	371	206	312	297	238	367	115	136	127
ADX16489-1	793	478	660	623	577	965	675	401	373
ADX16490-1	2033	1693	1986	1941	1520	4122	1586	1699	1685
ADX16491-1	2133	927	2508	2512	1917	5099	1048	2798	2807
ADX16492-1	1589	934	1840	1862	1437	2758	581	1362	1314
ADX16493-1	16	114	41	32	19	66	130	45	42
ADX16494-1	34	205	52	65	40	129	527	143	142
ADX16495-1	41	130	41	54	27	171	320	194	204
ADX16496-1	26	158	20	31	25	114	250	195	211
ADX16497-1	367	546	362	397	322	674	890	617	583
ADX16498-1	64	102	39	39	30	90	138	86	72
ADX16499-1	65	207	43	41	44	96	515	112	135
ADX16500-1	111	109	80	90	70	286	463	257	242
ADX16501-1	66	86	40	25	17	76	154	54	54
ADX16502-1	12	32	3	8	4	30	121	10	12
ADX16503-1	2	2	1	0	1	1	5	3	0
ADX16504-1	0	0	0	1	0	1	0	0	0
ADX16505-1	3	3	1	1	6	5	10	4	4
ADX16506-1	31	164	36	36	28	119	650	108	105
ADX16507-1	24	118	18	17	13	43	132	12	17
ADX16508-1	50	77	30	27	21	50	181	48	41
ADX16509-1	2868	1700	2691	2659	2084	1801	1342	1652	1750
ADX16510-1	241	248	287	313	230	443	238	297	322
ADX16511-1	193	1186	200	208	167	336	1513	201	210
ADX16512-1	79	80	111	99	78	148	111	122	110
ADX16513-1	160	516	151	151	126	233	1222	289	318
ADX16514-1	23	111	11	20	7	39	198	16	21
ADX16515-1	420	813	321	330	264	489	1374	386	409
ADX16516-1	182	285	138	109	125	191	207	117	125
ADX16517-1	438	1295	346	374	281	733	1376	190	240
ADX16518-1	455	339	407	404	342	935	910	1280	1210
ADX16519-1	245	169	267	231	183	498	594	856	904
ADX16520-1	412	260	366	374	260	725	637	725	755
ADX16521-1	193	416	185	174	133	301	933	299	302
ADX16522-1	115	114	85	101	65	229	214	201	215
ADX16523-1	872	1378	729	686	584	947	800	312	339
ADX16524-1	138	280	119	129	109	542	1434	1034	981
ADX16525-1	55	92	58	40	50	213	388	367	382
ADX16526-1	61	232	69	76	45	262	746	352	337
ADX16527-1	59	131	65	63	45	641	723	728	708
ADX16528-1	52	145	76	81	69	664	687	907	920
ADX16529-1	28	43	49	33	32	219	147	195	191
ADX16530-1	1	0	0	0	2	1	0	2	0
ADX16531-1	14	35	24	13	9	23	63	8	16
ADX16532-1	11	47	7	14	7	25	86	9	13
ADX16533-1	11	22	10	12	9	13	41	14	12
ADX16534-1	17	28	10	5	6	10	27	5	4
ADX16535-1	14	29	7	6	3	14	45	6	5
ADX16536-1	585	1522	483	493	353	827	830	341	349
ADX16537-1	683	4421	588	554	403	1781	9423	2102	2253
ADX16538-1	139	1505	141	136	100	192	2283	214	183
ADX16539-1	287	337	235	207	161	321	419	343	342
ADX16540-1	112	91	93	108	91	125	171	158	184
ADX16541-1	103	72	116	112	114	125	112	225	221
ADX16542-1	49	55	49	52	44	48	123	115	95
ADX16543-1	152	188	135	126	114	151	313	285	278
ADX16544-1	511	505	508	479	395	778	889	792	740
ADX16545-1	11	43	6	10	6	8	70	14	5
ADX16546-1	11	38	8	11	4	15	182	14	16
ADX16547-1	17	32	13	19	10	37	147	43	39
ADX16548-1	14	134	16	14	15	76	331	64	61
ADX16549-1	9	52	10	11	11	74	144	77	74
ADX16550-1	10	34	7	8	4	57	120	58	62
ADX16551-1	269	564	192	183	150	679	2274	879	979
ADX16552-1	104	102	83	94	85	198	201	131	128
ADX16553-1	93	113	59	80	58	174	218	154	186
ADX16554-1	127	192	133	116	97	231	197	191	191
ADX16555-1	78	213	58	62	49	125	463	122	133
ADX16556-1	99	178	58	71	55	125	427	124	144
ADX16557-1	292	203	145	163	117	118	112	26	29
ADX16558-1	442	962	291	312	232	390	992	219	235
ADX16559-1	157	158	125	136	91	181	214	168	119
ADX16560-1	84	208	65	65	50	49	85	34	44
ADX16561-1	41	199	26	32	22	89	511	124	122
ADX16562-1	175	250	60	76	54	114	204	67	58
ADX16563-1	225	971	149	140	119	284	1826	213	197
ADX16564-1	665	569	1191	1168	876	911	251	331	332
ADX16565-1	483	483	863	826	686	588	669	304	284
ADX16566-1	1385	13714	3137	3207	2495	1420	681	1090	1078
ADX16567-1	193	659	312	334	233	2352	11765	7675	7980
ADX16568-1	128	382	98	80	71	202	358	88	91
ADX16569-1	3801	3627	2337	2329	1810	2210	2883	1686	1804
ADX16570-1	489	380	198	207	137	400	432	185	211
ADX16571-1	303	1037	167	145	157	344	520	155	146
ADX16572-1	233	240	161	170	135	305	425	133	118
ADX16573-1	629	442	389	431	350	631	465	254	265
ADX16574-1	936	1145	288	248	226	692	1398	317	304
ADX16575-1	38	33	9	7	6	34	119	37	41
ADX16576-1	209	2672	141	171	140	315	3067	171	161
ADX16577-1	70	121	40	53	29	149	171	64	63
ADX16578-1	526	998	421	397	295	353	475	129	139
ADX16579-1	111	321	57	57	47	94	328	59	71
ADX16580-1	27	58	23	22	14	27	99	23	31
ADX16581-1	163	231	136	133	109	168	350	66	65
ADX16582-1	232	420	157	148	133	238	258	103	124
ADX16583-1	191	381	161	164	125	427	761	428	437
ADX16584-1	286	333	255	266	205	656	600	550	507
ADX16585-1	229	254	160	167	142	448	433	367	348
ADX16586-1	89	120	60	58	58	205	218	114	123
ADX16587-1	201	178	108	134	123	290	282	173	164
ADX16588-1	594	189	237	261	239	429	177	122	114
ADX16589-1	3	25	4	3	6	7	14	3	5
ADX16590-1	55	70	57	43	35	120	570	314	323
ADX16591-1	7	28	8	4	1	15	57	9	13
ADX16592-1	16	13	11	5	2	21	46	25	23
ADX16593-1	51	138	24	25	30	55	347	58	56
ADX16594-1	123	574	60	68	59	136	1223	130	134
ADX16595-1	100	185	31	37	32	88	314	61	63
ADX16596-1	106	223	56	52	59	144	347	103	93
ADX16597-1	73	282	44	56	36	120	954	101	119
ADX16598-1	28	29	25	25	18	62	55	43	53
ADX16599-1	102	308	81	86	66	179	676	185	223
ADX16600-1	197	550	137	131	138	515	727	481	478
ADX16601-1	414	1110	287	294	234	543	956	224	245
ADX16602-1	178	282	129	135	115	351	424	155	175
ADX16603-1	240	706	124	127	94	251	920	110	90
ADX16604-1	197	453	122	105	101	186	744	144	137
ADX16605-1	158	316	83	92	73	108	144	53	52
ADX16606-1	64	233	38	37	44	65	214	39	30
ADX16607-1	700	399	383	366	266	532	569	267	244
ADX16608-1	96	429	89	88	63	132	164	89	64
ADX16609-1	1128	1465	1079	1062	816	1548	1604	1108	1157
ADX16610-1	467	1213	368	372	295	660	1458	386	433
ADX16611-1	157	186	95	136	116	177	172	101	81
ADX16612-1	144	147	37	41	26	142	197	64	59
ADX16613-1	85	71	32	39	24	131	130	52	37
ADX16614-1	89	184	39	32	35	96	173	36	30
ADX16615-1	53	88	50	34	27	117	118	51	48
ADX16616-1	94	74	65	65	60	159	75	74	94
ADX16617-1	383	453	162	143	137	249	268	60	70
ADX16618-1	28	22	11	9	6	20	93	19	13
ADX16619-1	19	65	16	10	13	26	168	34	34
ADX16620-1	66	210	42	47	41	96	423	80	90
ADX16621-1	99	388	41	53	35	99	291	68	53
ADX16622-1	444	350	204	190	149	477	769	232	260
ADX16623-1	374	143	163	174	150	466	188	157	148
ADX16624-1	469	132	208	208	159	608	212	282	282
ADX16625-1	1199	1551	397	410	305	897	728	392	422
ADX16626-1	91	380	101	129	85	223	954	218	191
ADX16627-1	79	84	95	74	57	165	110	148	154
ADX16628-1	145	206	121	135	110	220	258	196	199
ADX16629-1	240	289	217	205	174	401	269	226	234
ADX16630-1	68	133	104	96	83	174	286	171	157
ADX16631-1	123	249	152	141	121	373	818	543	540
ADX16632-1	32	135	27	20	18	126	740	223	187
ADX16633-1	108	252	69	83	46	201	412	145	143
ADX16634-1	93	268	59	71	56	123	224	54	63
ADX16635-1	146	519	121	128	105	305	723	180	195
ADX16636-1	416	300	206	189	168	499	672	378	355
ADX16637-1	3638	2221	1382	1398	1039	2821	2227	1453	1499
ADX16638-1	287	185	157	173	126	409	337	343	346
ADX16639-1	427	652	284	284	241	634	994	638	640
ADX16640-1	198	947	217	214	167	1648	1447	3292	3331
ADX16641-1	314	592	216	214	171	518	2677	582	558
ADX16642-1	1149	747	956	968	758	2115	1321	1962	1986
ADX16643-1	0	1	1	0	1	2	1	1	0
ADX16644-1	22	31	11	8	4	28	48	26	30
ADX16645-1	63	49	33	35	14	42	209	25	24
ADX16646-1	32	205	24	19	15	68	369	70	55
ADX16647-1	11	34	8	15	10	47	82	35	31
ADX16648-1	251	136	72	68	56	157	143	60	56
ADX16649-1	1385	343	627	697	505	954	201	214	224
ADX16650-1	1371	2519	620	668	467	864	1309	255	237
ADX16651-1	180	123	137	123	92	195	148	114	135
ADX16652-1	542	365	454	406	362	632	454	449	422
ADX16653-1	675	487	491	516	395	703	614	430	456
ADX16654-1	1208	1023	995	959	814	1486	839	685	673
ADX16655-1	938	419	756	800	615	1437	836	1396	1353
ADX16656-1	2539	1508	2026	1970	1602	3523	2331	2263	2331
ADX16657-1	359	145	330	306	229	525	290	386	405
ADX16658-1	465	405	447	437	360	681	481	533	527
ADX16659-1	840	521	710	699	533	968	451	608	574
ADX16660-1	41	167	28	35	23	67	529	734	715
ADX16661-1	3	2	3	3	3	4	51	88	75
ADX16662-1	14	55	10	15	9	28	242	190	168
ADX16663-1	173	321	117	112	72	193	416	103	98
ADX16664-1	110	164	58	70	39	303	518	134	133
ADX16665-1	608	460	464	430	355	641	784	487	514
ADX16666-1	165	1059	112	111	83	222	1759	190	182
ADX16667-1	118	206	91	100	74	235	787	650	725
ADX16668-1	1666	834	1569	1579	1238	2051	1448	2872	2956
ADX16669-1	578	1013	514	519	367	683	1752	788	834
ADX16670-1	708	879	279	297	210	536	1359	161	183
ADX16671-1	15	84	15	17	11	87	207	91	99
ADX16672-1	294	335	350	348	266	600	597	459	499
ADX16673-1	294	318	238	265	207	354	647	322	295
ADX16674-1	129	233	84	76	79	133	500	96	83
ADX16675-1	2034	9736	895	882	731	1572	5378	447	411
ADX16676-1	25121	7879	15776	15977	12465	21382	2175	5048	5066
ADX16677-1	1106	212	490	516	457	1428	611	1234	1232
ADX16678-1	79	296	41	54	41	114	304	53	57
ADX16679-1	1436	1676	776	729	617	1148	625	398	423
ADX16680-1	655	320	342	356	218	491	445	209	224
ADX16681-1	101	179	103	90	93	117	164	65	50
ADX16682-1	114	264	109	110	76	136	440	67	55
ADX16683-1	251	230	264	249	191	368	202	208	196
ADX16684-1	90	453	61	53	48	122	874	173	188
ADX16685-1	40	90	31	25	19	64	196	79	59
ADX16686-1	409	1258	251	249	208	303	903	141	151
ADX16687-1	604	342	391	393	272	642	582	329	374
ADX16688-1	404	196	253	274	207	485	323	284	345
ADX16689-1	2636	1313	1892	1825	1509	3212	1426	1921	1897
ADX16690-1	384	465	356	380	288	821	807	853	804
ADX16691-1	307	228	246	272	237	753	400	551	557
ADX16692-1	352	291	359	367	297	736	465	447	468
ADX16693-1	856	1031	719	756	600	1388	1118	750	806
ADX16694-1	563	348	638	574	501	2332	1800	4155	4312
ADX16695-1	35	9	11	11	7	23	26	11	12
ADX16696-1	1877	1118	1372	1350	1092	2088	1257	1133	1169
ADX16697-1	55	144	37	37	21	73	429	103	99
ADX16698-1	10	31	6	11	6	25	111	27	34
ADX16699-1	24	25	9	11	7	26	64	23	19
ADX16700-1	541	386	381	431	315	434	273	199	182
ADX16701-1	0	0	1	0	1	0	0	2	0
ADX16702-1	2	6	1	3	3	5	13	9	5
ADX16703-1	23	106	10	12	22	54	209	36	30
ADX16704-1	23	4	15	14	14	70	12	50	35
ADX16705-1	6	18	1	1	1	18	79	10	7
ADX16706-1	362	129	229	279	192	423	104	136	130
ADX16707-1	4	1	1	2	3	2	2	2	3
ADX16708-1	4	27	3	5	2	12	68	12	10
ADX16709-1	60	185	42	35	34	90	268	57	68
ADX16710-1	7	19	9	1	5	15	32	9	14
ADX16711-1	1	6	2	3	2	5	15	3	5
ADX16712-1	27	224	30	27	30	55	562	53	84
ADX16713-1	547	697	569	595	438	1238	1023	886	951
ADX16714-1	136	301	135	142	109	259	602	147	185
ADX16715-1	45	45	35	37	28	112	38	63	67
ADX16716-1	2	3	0	1	0	1	2	0	1
ADX16717-1	1	5	2	1	0	3	5	1	3
ADX16718-1	1	1	0	1	1	0	1	1	0
ADX16719-1	17	69	16	10	14	47	332	36	45
ADX16720-1	431	1902	207	199	132	660	2265	230	237
ADX16721-1	182	40	22	26	35	43	119	34	28
ADX16722-1	353	58	36	39	28	69	60	48	55
ADX16723-1	38	127	38	34	23	102	449	127	145
ADX16724-1	0	0	0	0	0	0	0	0	1
ADX16725-1	6	26	3	3	2	6	43	14	8
ADX16726-1	6	5	7	0	2	12	12	8	7
ADX16727-1	14	90	3	7	9	21	70	13	20
ADX16728-1	56	206	38	33	28	128	358	74	65
ADX16729-1	40	158	32	33	29	100	181	79	69
ADX16730-1	39	136	40	35	24	107	272	97	92
ADX16731-1	7	42	5	4	4	20	35	9	11
ADX16732-1	3	1	2	3	1	16	1	11	11
ADX16733-1	1	17	6	7	3	31	21	16	11
ADX16734-1	9	36	6	8	4	14	41	11	14
ADX16735-1	26	97	19	25	16	43	174	45	43
ADX16736-1	8	10	2	4	3	15	15	6	13
ADX16737-1	7	7	3	3	4	14	13	11	6
ADX16738-1	90	262	42	55	36	140	252	116	96
ADX16739-1	11	20	10	4	4	21	68	14	14
ADX16740-1	50	154	48	46	36	116	223	119	112
ADX16741-1	127	89	122	124	94	347	423	693	703
ADX16742-1	16	18	13	6	12	71	82	54	45
ADX16743-1	8	52	11	8	5	17	185	19	30
ADX16744-1	22	170	18	16	16	33	201	28	24
ADX16745-1	54	297	48	43	55	135	674	103	107
ADX16746-1	1	3	1	0	1	9	11	7	6
ADX16747-1	22	56	14	27	21	64	160	39	37
ADX16748-1	3	8	3	7	8	25	56	27	42
ADX16749-1	36	70	37	26	14	73	452	79	74
ADX16750-1	21	104	16	8	6	26	160	31	29
ADX16751-1	0	0	3	0	0	1	0	0	1
ADX16752-1	6	9	10	10	7	33	24	31	24
ADX16753-1	110	145	133	137	107	630	833	865	908
ADX16754-1	48	114	25	25	15	90	126	116	110
ADX16755-1	450	826	435	465	351	1137	2057	891	914
ADX16756-1	250	326	232	228	178	274	263	139	147
ADX16757-1	146	156	117	116	92	402	350	344	345
ADX16758-1	107	451	75	99	65	220	340	102	80
ADX16759-1	1011	911	646	606	544	1108	684	297	345
ADX16760-1	918	615	585	570	434	915	920	248	266
ADX16761-1	415	398	288	285	204	440	610	142	163
ADX16762-1	480	657	349	341	260	567	932	268	311
ADX16763-1	209	220	138	154	132	223	416	95	103
ADX16764-1	74	16	42	49	27	370	656	2025	2083
ADX16765-1	1623	3247	1240	1217	969	896	598	383	385
ADX16766-1	1109	820	702	733	577	1125	549	345	355
ADX16767-1	182	368	125	133	119	308	761	343	363
ADX16768-1	7155	2919	5483	5596	4363	9636	3865	7093	7444
ADX16769-1	144	316	121	111	93	156	357	123	129
ADX16770-1	37	154	32	33	24	89	534	87	103
ADX16771-1	292	1206	185	195	153	437	1520	320	276
ADX16772-1	54	106	31	29	20	66	112	43	34
ADX16773-1	270	953	245	262	209	532	2278	520	505
ADX16774-1	79	113	115	146	106	281	427	318	338
ADX16775-1	17	88	15	15	13	59	161	77	65
ADX16776-1	68	117	70	97	47	134	229	173	181
ADX16777-1	199	598	277	237	167	214	590	169	194
ADX16778-1	303	546	182	169	141	239	1359	129	138
ADX16779-1	25	68	15	16	16	43	190	39	25
ADX16780-1	42	89	38	39	22	88	529	52	63
ADX16781-1	99	26	123	87	89	200	28	165	162
ADX16782-1	371	1196	269	284	185	337	449	153	145
ADX16783-1	470	845	558	533	406	1319	2714	1707	1707
ADX16784-1	507	536	166	184	109	360	665	100	92
ADX16785-1	11	49	7	5	9	72	697	254	290
ADX16786-1	16	6	10	12	9	541	602	2353	2438
ADX16787-1	48	42	22	36	22	1364	1738	4549	4639
ADX16788-1	52	138	53	63	59	2669	4017	8796	8974
ADX16789-1	3	18	3	6	1	79	3503	569	564
ADX16790-1	2	3	4	0	0	17	77	137	157
ADX16791-1	102	574	80	71	49	277	2638	624	658
ADX16792-1	104	142	74	76	51	100	191	54	66
ADX16793-1	100	213	74	64	49	112	282	78	61
ADX16794-1	77	220	59	51	40	138	479	124	94
ADX16795-1	15	77	16	16	6	37	194	28	29
ADX16796-1	30	138	17	16	8	63	272	45	34
ADX16797-1	31	29	32	33	31	49	58	37	37
ADX16798-1	5	19	11	6	3	70	90	58	56
ADX16799-1	28	94	17	16	13	69	77	46	41
ADX16800-1	15	33	10	12	7	56	98	45	35
ADX16801-1	3	9	5	5	5	36	62	37	25
ADX16802-1	8	12	2	2	1	30	59	29	32
ADX16803-1	9	18	5	8	7	35	54	33	27
ADX16804-1	21	190	27	22	23	79	404	46	61
ADX16805-1	13	33	11	6	5	26	45	17	20
ADX16806-1	52	280	41	43	26	88	355	47	67
ADX16807-1	42	24	11	13	11	56	59	26	23
ADX16808-1	13	101	12	12	2	34	346	28	32
ADX16809-1	55	94	66	57	29	88	103	177	195
ADX16810-1	99	103	105	88	83	235	244	253	274
ADX16811-1	229	2193	175	173	145	366	4577	215	199
ADX16812-1	65	77	40	38	23	85	81	29	38
ADX16813-1	18	45	15	12	12	15	55	5	20
ADX16814-1	24	45	9	9	12	30	124	14	26
ADX16815-1	71	220	96	90	78	372	714	469	494
ADX16816-1	22	21	24	41	29	185	173	436	453
ADX16817-1	43	280	39	42	28	303	4110	619	670
ADX16818-1	21	155	10	20	19	95	3002	208	234
ADX16819-1	0	0	0	0	0	1	0	1	2
ADX16820-1	2	1	2	2	0	26	24	47	53
ADX16821-1	152	350	142	139	119	579	236	179	168
ADX16822-1	169	674	166	144	134	680	579	266	258
ADX16823-1	236	477	366	383	284	7575	916	675	641
ADX16824-1	252	141	157	163	117	3340	419	459	427
ADX16825-1	56	186	56	58	35	407	1249	895	979
ADX16826-1	308	506	233	274	161	281	746	196	199
ADX16827-1	89	468	62	62	61	239	755	158	155
ADX16828-1	11	38	5	4	8	103	82	66	59
ADX16829-1	15	37	10	7	5	332	273	165	148
ADX16830-1	4	10	2	6	2	785	141	186	234
ADX16831-1	33	193	29	28	14	328	717	117	109
ADX16832-1	118	348	91	81	72	988	509	213	297
ADX16833-1	35	157	20	30	17	56	124	23	28
ADX16834-1	183	143	158	147	121	263	159	136	135
ADX16835-1	382	549	275	286	228	501	634	322	319
ADX16836-1	165	230	127	120	87	169	84	100	125
ADX16837-1	554	1315	366	395	368	308	338	138	149
ADX16838-1	64	99	45	34	21	62	298	57	51
ADX16839-1	2	10	2	1	0	6	18	6	7
ADX16840-1	6	22	4	4	2	10	16	15	9
ADX16841-1	8	8	5	8	4	20	105	38	34
ADX16842-1	5	20	2	3	3	15	74	10	10
ADX16843-1	49	1137	43	48	39	111	1974	70	101
ADX16844-1	125	486	101	97	73	196	472	258	237
ADX16845-1	119	121	93	97	91	135	266	118	111
ADX16846-1	115	133	120	100	83	194	181	162	147
ADX16847-1	213	363	204	223	167	422	873	414	413
ADX16848-1	203	280	139	118	130	205	378	104	104
ADX16849-1	1335	927	968	1043	804	1464	1463	777	815
ADX16850-1	1707	1221	1183	1204	998	1743	990	842	807
ADX16851-1	58	32	44	25	32	138	95	146	170
ADX16852-1	35	31	25	39	25	220	279	334	374
ADX16853-1	75	118	59	54	34	97	263	77	74
ADX16854-1	437	605	253	256	212	452	377	162	136
ADX16855-1	1128	857	584	624	489	535	156	101	83
ADX16856-1	94	139	63	61	53	72	313	52	53
ADX16857-1	35	9	31	41	22	28	40	18	18
ADX16858-1	5	17	3	4	6	9	9	5	1
ADX16859-1	9	53	9	9	4	28	45	17	12
ADX16860-1	140	217	117	123	88	189	801	185	210
ADX16861-1	281	169	270	315	241	457	342	466	505
ADX16862-1	357	968	415	457	350	627	412	323	323
ADX16863-1	246	556	385	395	313	609	490	528	569
ADX16864-1	556	1275	493	414	370	825	2546	766	846
ADX16865-1	142	344	202	240	167	585	1329	909	973
ADX16866-1	81	377	59	58	44	149	553	79	110
ADX16867-1	131	539	115	136	97	339	2164	365	404
ADX16868-1	115	72	115	129	89	332	241	408	433
ADX16869-1	132	160	127	120	116	340	305	276	273
ADX16870-1	392	206	221	206	204	414	341	270	222
ADX16871-1	857	358	995	991	764	1415	760	1916	1939
ADX16872-1	574	197	641	543	509	879	525	1347	1282
ADX16873-1	941	3777	1043	1048	875	1134	3438	959	981
ADX16874-1	1199	1938	910	917	713	1414	1416	904	879
ADX16875-1	626	608	511	538	377	794	1318	894	889
ADX16876-1	821	366	721	675	602	1168	321	742	644
ADX16877-1	1265	591	1206	1290	948	1842	683	1353	1344
ADX16878-1	1115	1235	1227	1132	972	1805	923	1209	1103
ADX16879-1	1103	504	1141	1069	885	1750	493	1091	1021
ADX16880-1	834	306	717	681	539	944	284	616	540
ADX16881-1	948	499	622	702	518	964	416	629	618
ADX16882-1	653	238	502	508	387	670	240	497	485
ADX16883-1	2355	2681	2057	2045	1544	3868	3618	3802	3840
ADX16884-1	1239	577	1192	1161	885	2157	1085	2353	2298
ADX16885-1	2601	1155	1629	1567	1322	2837	1126	1307	1347
ADX16886-1	1081	1975	678	632	521	840	368	181	212
ADX16887-1	170	236	75	63	69	165	473	101	126
ADX16888-1	73	57	50	53	41	122	122	101	82
ADX16889-1	16985	11049	8917	8938	6871	9344	2241	2615	2649
ADX16890-1	7125	945	3571	3554	2779	3772	331	1164	1234
ADX16891-1	3742	2828	2143	2180	1687	2873	2025	897	975
ADX16892-1	2456	571	1011	1023	798	1365	411	480	463
ADX16893-1	2290	775	1212	1194	993	1658	617	497	519
ADX16894-1	6439	3005	3911	3981	3005	4513	5863	1856	1901
ADX16895-1	12908	4356	9328	9688	7152	12454	3714	6812	7162
ADX16896-1	5328	2437	4350	4367	3556	4844	922	1477	1460
ADX16897-1	430	836	202	183	139	290	459	137	128
ADX16898-1	343	754	214	196	155	309	795	216	199
ADX16899-1	225	135	150	135	100	199	164	124	124
ADX16900-1	409	213	231	213	180	329	164	213	181
ADX16901-1	339	168	191	168	140	335	1369	399	451
ADX16902-1	2645	556	640	630	485	2958	1934	1812	1962
ADX16903-1	117	323	66	64	52	71	549	78	69
ADX16904-1	237	829	208	240	175	518	1561	355	344
ADX16905-1	181	124	174	202	146	329	181	261	272
ADX16906-1	151	96	153	169	121	286	121	225	243
ADX16907-1	141	749	151	131	120	228	1229	151	173
ADX16908-1	159	430	198	179	151	407	2401	388	380
ADX16909-1	173	199	191	190	153	382	354	501	527
ADX16910-1	999	516	1202	1205	931	198	250	207	222
ADX16911-1	127	169	98	105	74	299	513	413	423
ADX16912-1	239	818	281	304	213	503	1317	296	313
ADX16913-1	162	33	54	68	47	33	20	25	12
ADX16914-1	81	156	42	55	26	199	506	147	199
ADX16915-1	663	1362	660	610	507	1095	3243	766	836
ADX16916-1	691	2308	489	477	384	750	670	282	255
ADX16917-1	290	113	180	200	123	294	160	111	121
ADX16918-1	524	490	376	347	276	519	524	242	263
ADX16919-1	464	493	358	312	286	572	917	276	287
ADX16920-1	496	440	507	515	389	789	420	597	576
ADX16921-1	731	268	436	450	378	700	225	323	317
ADX16922-1	536	293	287	268	239	438	413	179	197
ADX16923-1	106	240	64	86	44	88	341	152	174
ADX16924-1	520	93	195	201	161	247	68	64	89
ADX16925-1	768	256	261	346	261	449	533	139	148
ADX16926-1	56	109	50	52	53	194	1008	429	480
ADX16927-1	0	0	0	0	1	0	1	0	0
ADX16928-1	236	755	159	139	120	253	835	219	203
ADX16929-1	466	326	355	379	303	543	419	404	411
ADX16930-1	1016	725	960	930	738	1849	2238	1970	2025
ADX16931-1	831	1123	704	695	543	1754	3172	1621	1641
ADX16932-1	468	365	467	466	363	483	515	304	284
ADX16933-1	366	160	316	297	269	431	243	171	189
ADX16934-1	1391	2163	825	840	666	1283	1457	581	534
ADX16935-1	49	81	24	37	25	57	77	30	35
ADX16936-1	51	10	29	31	26	47	27	33	38
ADX16937-1	352	2133	425	409	337	1295	4232	839	846
ADX16938-1	990	988	1739	1874	1425	6651	1712	3702	3631
ADX16939-1	140	109	87	88	81	1094	828	1753	1742
ADX16940-1	65	191	24	16	14	103	447	52	66
ADX16941-1	315	606	293	275	182	396	433	231	247
ADX16942-1	199	122	76	66	49	273	397	303	289
ADX16943-1	137	934	68	59	50	104	95	19	13
ADX16944-1	0	1	2	1	1	11	22	29	40
ADX16945-1	45	14	40	40	39	758	1699	5529	5541
ADX16946-1	221	70	132	137	113	800	620	1443	1476
ADX16947-1	79	124	74	77	47	475	1165	792	745
ADX16948-1	6	4	2	4	4	19	13	15	12
ADX16949-1	16	8	7	7	3	17	19	23	20
ADX16950-1	178	209	262	278	185	275	1104	570	582
ADX16951-1	67	519	71	68	60	188	1310	186	150
ADX16952-1	64	114	62	72	46	234	283	131	136
ADX16953-1	221	229	106	139	95	158	624	119	121
ADX16954-1	67	262	49	72	41	207	1157	346	379
ADX16955-1	27	59	19	24	14	58	208	78	101
ADX16956-1	50	156	37	46	31	73	168	98	113
ADX16957-1	24	24	15	23	21	49	71	50	54
ADX16958-1	23	21	10	9	9	44	37	41	39
ADX16959-1	96	391	87	87	61	255	658	173	150
ADX16960-1	47	78	25	28	15	164	177	113	141
ADX16961-1	190	244	134	121	79	243	545	173	161
ADX16962-1	69	198	60	64	56	148	376	123	122
ADX16963-1	11	7	6	8	5	74	94	52	58
ADX16964-1	279	951	174	194	157	423	451	149	162
ADX16965-1	106	38	131	143	132	1717	280	902	929
ADX16966-1	7	31	8	10	2	28	283	39	48
ADX16967-1	92	1079	138	143	116	430	1092	299	344
ADX16968-1	522	1776	359	384	262	516	783	266	280
ADX16969-1	66	308	56	50	30	90	749	86	79
ADX16970-1	36	17	31	27	21	71	42	69	61
ADX16971-1	41	98	19	20	20	50	160	30	34
ADX16972-1	19	31	17	12	13	32	66	27	32
ADX16973-1	64	70	55	37	29	434	574	712	701
ADX16974-1	54	52	36	37	32	58	39	15	21
ADX16975-1	39	47	36	28	20	84	222	146	178
ADX16976-1	200	729	122	144	93	212	530	215	229
ADX16977-1	120	819	104	84	60	133	572	77	87
ADX16978-1	66	104	43	33	17	62	80	29	16
ADX16979-1	60	281	51	55	27	101	314	68	44
ADX16980-1	42	41	28	35	27	74	79	43	56
ADX16981-1	17	47	18	14	13	82	200	70	78
ADX16982-1	39	35	27	20	16	99	55	80	90
ADX16983-1	138	437	102	105	83	596	1323	436	427
ADX16984-1	114	142	120	127	83	558	589	998	966
ADX16985-1	95	666	96	114	69	629	996	1296	1318
ADX16986-1	14	31	8	10	4	39	38	90	100
ADX16987-1	901	1730	983	899	782	2622	6639	2523	2547
ADX16988-1	50	88	29	18	23	84	219	39	46
ADX16989-1	88	137	72	80	76	163	322	149	131
ADX16990-1	197	152	162	142	119	172	274	119	91
ADX16991-1	6839	2229	5398	5339	4121	3033	1953	3092	3109
ADX16992-1	461	1874	429	386	317	1561	12496	1408	1326
ADX16993-1	339	208	363	360	273	935	408	732	726
ADX16994-1	179	92	122	133	107	167	181	88	79
ADX16995-1	248	378	204	179	155	298	639	188	206
ADX16996-1	426	403	328	315	261	527	430	251	283
ADX16997-1	182	126	138	131	113	206	226	183	162
ADX16998-1	414	796	366	374	304	544	617	309	305
ADX16999-1	728	487	685	603	537	844	497	545	510
ADX17000-1	212	123	128	151	141	231	261	212	231
ADX17001-1	207	505	186	211	193	457	1187	533	584
ADX17002-1	143	71	132	147	106	280	125	298	317
ADX17003-1	188	288	191	177	114	250	374	239	210
ADX17004-1	18	98	12	14	10	457	342	206	209
ADX17005-1	22	97	14	14	7	512	181	134	150
ADX17006-1	12	89	11	15	12	583	198	194	180
ADX17007-1	16	43	12	21	16	491	272	178	194
ADX17008-1	13	40	10	12	7	242	116	88	62
ADX17009-1	29	207	44	34	27	231	2134	265	280
ADX17010-1	113	215	98	98	77	242	543	223	226
ADX17011-1	139	139	140	149	112	208	281	204	207
ADX17012-1	2	5	1	0	1	0	7	0	0
ADX17013-1	181	248	221	225	177	1332	5057	3627	3723
ADX17014-1	82	11	44	45	28	231	63	176	186
ADX17015-1	86	125	53	55	36	486	419	331	333
ADX17016-1	34	36	19	14	18	80	65	78	93
ADX17017-1	51	72	30	38	30	162	499	162	151
ADX17018-1	42	114	31	32	16	157	345	135	134
ADX17019-1	61	213	65	77	59	286	409	249	295
ADX17020-1	42	233	77	71	59	732	914	1041	1121
ADX17021-1	103	36	74	83	47	106	92	72	57
ADX17022-1	317	242	186	164	146	207	458	203	192
ADX17023-1	72	115	54	57	50	98	219	83	70
ADX17024-1	131	151	130	131	99	222	354	148	132
ADX17025-1	194	293	143	162	127	351	365	334	316
ADX17026-1	83	235	61	64	53	258	645	371	327
ADX17027-1	17	49	21	16	9	41	123	82	62
ADX17028-1	75	173	128	91	79	299	527	291	304
ADX17029-1	597	470	344	308	232	455	488	202	200
ADX17030-1	83	111	85	97	72	2244	2901	4637	4712
ADX17031-1	19	80	12	13	14	432	4070	598	605
ADX17032-1	104	443	99	86	56	297	923	437	384
ADX17033-1	598	155	498	506	354	861	168	442	380
ADX17034-1	4458	35963	3226	3260	2517	4407	19910	2140	2294
ADX17035-1	33865	4378	18527	18599	14250	21010	2715	8234	8652
ADX17036-1	13676	1402	6369	6278	4742	7326	652	2081	2134
ADX17037-1	17793	2373	9319	9349	7302	10789	1106	3607	3753
ADX17038-1	776	231	496	452	335	713	179	300	333
ADX17039-1	3050	9592	1820	1844	1357	3275	23072	2291	2360
ADX17040-1	1581	779	1113	1079	825	2268	1537	2002	1960
ADX17041-1	167	193	136	139	105	177	178	85	103
ADX17042-1	82	93	67	65	67	132	252	80	94
ADX17043-1	75	73	55	68	39	122	107	70	71
ADX17044-1	137	144	106	91	68	190	240	162	177
ADX17045-1	75	57	45	56	38	164	221	167	158
ADX17046-1	411	277	290	277	217	290	239	143	188
ADX17047-1	483	1013	226	239	192	46	39	16	18
ADX17048-1	184	120	205	221	143	280	263	166	175
ADX17049-1	50	149	53	74	65	124	298	89	129
ADX17050-1	0	0	2	0	1	1	1	1	0
ADX17051-1	176	2070	2292	2279	1845	6205	2324	2871	2780
ADX17052-1	50	378	94	84	71	216	942	91	91
ADX17053-1	3	23	2	1	0	13	33	10	4
ADX17054-1	31	159	14	17	8	44	194	20	16
ADX17055-1	50	197	29	25	30	91	313	45	42
ADX17056-1	33	270	24	21	13	50	371	26	11
ADX17057-1	26	51	7	16	11	35	78	9	13
ADX17058-1	114	899	58	50	32	197	1995	156	141
ADX17059-1	26	117	21	11	8	25	292	24	22
ADX17060-1	65	88	42	72	43	83	162	79	63
ADX17061-1	30	341	45	33	22	64	580	58	57
ADX17062-1	9	79	7	5	4	23	533	21	21
ADX17063-1	1	10	4	3	6	12	48	10	16
ADX17064-1	168	231	100	116	64	208	429	158	145
ADX17065-1	254	503	319	310	250	612	882	561	565
ADX17066-1	43	38	52	45	36	81	59	79	77
ADX17067-1	152	315	119	107	76	285	2298	329	346
ADX17068-1	52	113	41	50	33	158	368	108	103
ADX17069-1	92	158	72	52	44	23	25	31	27
ADX17070-1	230	185	203	210	163	92	189	118	99
ADX17071-1	91	76	69	84	52	32	134	58	73
ADX17072-1	209	304	179	189	134	129	642	143	165
ADX17073-1	116	174	99	95	60	95	200	61	70
ADX17074-1	65	33	27	38	31	27	94	29	28
ADX17075-1	142	364	98	92	75	173	376	245	196
ADX17076-1	64	48	52	36	34	71	450	58	59
ADX17077-1	44343	112263	43018	44159	33406	88183	199515	58174	59536
ADX17078-1	2085	528	765	765	642	637	861	642	631
ADX17079-1	4	10	5	2	2	16	30	30	28
ADX17080-1	88	415	62	73	42	120	771	126	100
ADX17081-1	82	331	48	51	27	134	703	85	103
ADX17082-1	6	11	3	2	3	48	93	72	80
ADX17083-1	4	32	1	6	3	54	197	70	66
ADX17084-1	40	165	46	30	27	71	336	48	58
ADX17085-1	10	26	2	8	4	15	39	8	11
ADX17086-1	4	31	4	5	1	13	78	3	6
ADX17087-1	102	172	142	140	106	480	492	474	490
ADX17088-1	27	107	44	57	33	98	296	108	114
ADX17089-1	217	322	104	114	93	284	368	151	148
ADX17090-1	159	78	123	97	88	351	243	380	381
ADX17091-1	11	90	6	14	9	45	334	82	86
ADX17092-1	119	423	102	90	65	168	613	161	155
ADX17093-1	29	36	17	17	19	129	237	548	564
ADX17094-1	117	346	51	69	57	389	1693	1021	1065
ADX17095-1	5	47	10	2	6	15	128	26	44
ADX17096-1	23	58	5	6	6	39	301	93	101
ADX17097-1	26	35	11	7	5	42	199	93	102
ADX17098-1	13	44	7	6	6	22	439	233	249
ADX17099-1	14	19	2	10	7	35	112	236	254
ADX17100-1	47	179	33	28	24	67	452	284	286
ADX17101-1	36	193	31	17	23	55	300	153	160
ADX17102-1	78	66	66	59	38	127	291	481	441
ADX17103-1	19	36	14	23	11	40	116	106	118
ADX17104-1	8	10	4	7	8	28	45	65	65
ADX17105-1	17	58	12	12	10	45	117	59	59
ADX17106-1	20	109	9	19	10	26	345	58	60
ADX17107-1	41	171	30	23	23	55	354	52	65
ADX17108-1	6	15	2	5	4	10	168	117	102
ADX17109-1	6	4	1	3	2	5	80	98	99
ADX17110-1	8	0	0	1	0	4	18	60	69
ADX17111-1	18	7	8	4	5	14	117	219	213
ADX17112-1	21	78	11	7	8	26	264	96	102
ADX17113-1	6	7	3	6	4	20	360	139	141
ADX17114-1	76	193	37	32	30	82	408	170	192
ADX17115-1	14	6	1	4	2	10	135	50	49
ADX17116-1	63	116	43	38	23	112	442	206	208
ADX17117-1	83	348	66	56	32	97	357	140	145
ADX17118-1	15	37	20	18	10	27	90	41	33
ADX17119-1	17	22	18	11	10	26	78	33	29
ADX17120-1	47	220	57	63	43	110	336	130	115
ADX17121-1	32	28	13	18	12	41	365	120	126
ADX17122-1	5	2	3	2	1	6	10	13	12
ADX17123-1	23	24	16	20	6	25	85	57	47
ADX17124-1	99	71	33	29	18	59	259	68	91
ADX17125-1	324	314	131	128	107	556	630	413	369
ADX17126-1	344	205	305	293	257	411	252	283	287
ADX17127-1	465	478	398	382	282	797	1370	957	972
ADX17128-1	334	74	45	59	40	104	160	46	44
ADX17129-1	84	70	46	49	41	78	138	77	70
ADX17130-1	766	1303	615	582	490	967	2107	769	811
ADX17131-1	1018	317	745	722	522	2006	1276	3227	3244
ADX17132-1	283	1004	257	218	200	422	533	223	226
ADX17133-1	2309	2188	1523	1509	1108	2240	2280	1132	1165
ADX17134-1	640	750	291	329	223	451	345	175	172
ADX17135-1	260	713	251	263	177	396	1711	403	422
ADX17136-1	138	78	83	119	84	164	120	112	108
ADX17137-1	102	253	69	76	60	126	253	98	99
ADX17138-1	29	99	18	20	21	74	403	123	105
ADX17139-1	236	421	208	242	170	295	541	193	185
ADX17140-1	73	78	84	64	59	180	539	283	293
ADX17141-1	196	235	158	130	98	177	421	250	204
ADX17142-1	134	326	92	77	53	103	240	78	67
ADX17143-1	50	39	26	37	20	31	58	18	21
ADX17144-1	625	377	644	694	518	1658	951	2735	2813
ADX17145-1	1501	1341	1238	1199	1017	2126	3357	1754	1912
ADX17146-1	93	108	59	54	49	114	180	89	88
ADX17147-1	78	358	83	86	54	162	587	121	145
ADX17148-1	273	313	232	243	174	377	277	199	178
ADX17149-1	1462	547	937	973	779	1447	680	815	845
ADX17150-1	248	186	280	268	221	313	157	184	161
ADX17151-1	349	2622	339	313	289	699	3480	760	783
ADX17152-1	1192	846	892	968	657	2009	1111	853	881
ADX17153-1	335	144	163	148	121	285	869	178	153
ADX17154-1	449	75	152	154	135	291	87	60	63
ADX17155-1	299	154	130	103	87	193	227	46	55
ADX17156-1	519	155	148	136	104	289	190	50	57
ADX17157-1	1670	442	515	512	401	831	312	226	219
ADX17158-1	560	290	216	214	172	361	302	172	147
ADX17159-1	745	518	225	227	167	441	248	109	119
ADX17160-1	722	1342	355	335	266	498	925	178	183
ADX17161-1	416	198	223	219	164	367	485	195	181
ADX17162-1	255	509	222	225	167	353	741	304	314
ADX17163-1	319	485	388	339	329	442	415	266	223
ADX17164-1	517	505	393	410	340	769	543	487	504
ADX17165-1	259	338	245	230	219	322	460	295	260
ADX17166-1	296	538	637	617	463	2744	1196	1569	1470
ADX17167-1	144	190	165	180	142	975	855	710	681
ADX17168-1	79	196	65	64	62	216	388	156	120
ADX17169-1	57	78	41	52	40	71	163	50	56
ADX17170-1	93	278	26	31	22	55	159	15	23
ADX17171-1	45	311	36	40	33	172	713	104	104
ADX17172-1	918	2768	684	671	516	1463	2251	791	778
ADX17173-1	134	397	44	45	33	97	260	52	46
ADX17174-1	899	169	109	136	109	269	488	88	82
ADX17175-1	651	601	626	607	481	1043	1515	823	810
ADX17176-1	801	305	460	453	371	635	437	632	590
ADX17177-1	879	335	534	482	383	634	360	614	604
ADX17178-1	109	236	61	58	42	133	544	124	117
ADX17179-1	129	745	91	98	54	256	998	135	113
ADX17180-1	96	30	64	52	40	156	98	75	76
ADX17181-1	51	18	30	24	32	66	31	51	35
ADX17182-1	82	319	62	55	46	190	3436	301	342
ADX17183-1	10	33	3	8	5	14	49	12	13
ADX17184-1	18	42	16	14	8	19	61	14	30
ADX17185-1	82	288	42	56	48	109	515	112	91
ADX17186-1	41	123	19	26	21	69	340	64	75
ADX17187-1	388	268	138	136	113	514	576	428	452
ADX17188-1	104	69	50	26	30	118	1048	418	409
ADX17189-1	91	240	45	58	35	96	312	81	87
ADX17190-1	61	328	47	67	67	173	592	178	155
ADX17191-1	12	128	17	15	14	45	256	37	38
ADX17192-1	12	44	10	11	8	47	112	32	42
ADX17193-1	6	18	6	6	5	43	61	36	43
ADX17194-1	124	68	88	66	62	127	125	121	122
ADX17195-1	126	466	62	60	49	108	708	111	115
ADX17196-1	3	5	1	3	2	4	9	6	11
ADX17197-1	33	144	25	21	15	55	242	93	89
ADX17198-1	83	457	54	49	35	151	1399	237	236
ADX17199-1	69	135	53	47	38	122	604	136	126
ADX17200-1	200	270	206	193	143	397	606	357	342
ADX17201-1	442	231	533	518	408	797	370	419	396
ADX17202-1	249	920	252	259	192	414	1238	232	226
ADX17203-1	13	42	13	9	7	38	44	21	24
ADX17204-1	18	38	18	16	16	97	100	62	56
ADX17205-1	10	22	25	24	19	87	73	63	61
ADX17206-1	4	4	4	1	1	5	33	12	8
ADX17207-1	58	324	67	58	61	132	635	107	104
ADX17208-1	56	73	28	25	16	49	3288	309	367
ADX17209-1	140	299	123	116	83	183	305	121	102
ADX17210-1	236	575	250	273	206	550	1449	524	539
ADX17211-1	160	275	124	148	85	219	446	192	206
ADX17212-1	14	3	11	8	1	138	101	347	305
ADX17213-1	12	10	8	8	4	45	133	107	117
ADX17214-1	19	118	13	22	8	103	362	223	221
ADX17215-1	54	88	42	38	33	91	127	61	76
ADX17216-1	51	183	47	48	40	112	183	59	67
ADX17217-1	84	72	47	56	42	49	67	34	46
ADX17218-1	88	56	40	43	27	50	81	25	23
ADX17219-1	131	111	62	48	41	53	47	32	20
ADX17220-1	142	313	88	102	77	220	540	204	230
ADX17221-1	154	474	78	101	57	103	230	63	60
ADX17222-1	42	55	28	31	21	48	79	36	36
ADX17223-1	30	53	41	40	28	62	126	59	50
ADX17224-1	224	342	111	114	105	152	136	53	53
ADX17225-1	32	106	23	32	19	38	142	35	26
ADX17226-1	655	990	342	368	286	173	672	76	93
ADX17227-1	92	61	38	32	21	31	92	28	29
ADX17228-1	88	234	53	82	41	131	343	80	90
ADX17229-1	8	17	6	7	6	22	22	17	14
ADX17230-1	16	30	10	13	19	62	72	65	62
ADX17231-1	46	119	47	42	40	160	323	201	222
ADX17232-1	30	136	19	30	16	77	178	101	94
ADX17233-1	15	28	14	6	8	31	57	44	45
ADX17234-1	36	99	29	30	20	126	150	190	182
ADX17235-1	33	82	22	22	17	133	1027	216	249
ADX17236-1	23	82	20	25	19	149	245	97	148
ADX17237-1	30	56	24	20	13	133	463	153	166
ADX17238-1	1	13	2	3	0	4	39	10	7
ADX17239-1	88	337	70	55	53	145	567	82	93
ADX17240-1	240	453	261	228	171	256	1083	322	337
ADX17241-1	54	123	63	73	44	168	289	118	123
ADX17242-1	14	51	22	22	24	78	206	66	59
ADX17243-1	16	44	12	8	15	65	395	129	124
ADX17244-1	31	122	33	20	24	51	234	33	38
ADX17245-1	35	153	25	31	14	59	243	59	55
ADX17246-1	105	92	95	99	67	125	153	146	168
ADX17247-1	115	221	74	84	54	231	539	401	398
ADX17248-1	84	225	59	60	41	112	281	83	75
ADX17249-1	92	28	59	51	42	85	41	71	77
ADX17250-1	120	316	91	85	54	163	503	160	128
ADX17251-1	13	26	6	18	3	19	35	19	25
ADX17252-1	53	125	51	43	33	102	208	69	79
ADX17253-1	191	381	332	364	249	562	989	377	361
ADX17254-1	57	162	49	40	34	79	177	75	67
ADX17255-1	58	236	34	40	20	88	551	66	69
ADX17256-1	52	128	39	30	30	65	338	52	58
ADX17257-1	61	253	65	71	54	292	672	312	292
ADX17258-1	27	188	36	30	27	198	575	186	195
ADX17259-1	26	104	22	37	22	140	329	155	143
ADX17260-1	9	27	8	7	2	57	74	58	68
ADX17261-1	34	22	22	34	20	158	137	174	176
ADX17262-1	22	37	12	17	8	181	806	368	416
ADX17263-1	17	21	17	22	10	44	48	65	72
ADX17264-1	8	1	15	18	12	86	46	169	182
ADX17265-1	0	6	4	4	2	34	24	59	62
ADX17266-1	322	836	367	359	270	849	1152	439	451
ADX17267-1	78	43	70	74	69	265	203	257	235
ADX17268-1	165	717	110	118	95	402	2114	459	454
ADX17269-1	46	56	32	33	29	99	144	188	160
ADX17270-1	268	326	148	163	135	535	1268	1365	1309
ADX17271-1	43	131	21	24	9	60	306	57	49
ADX17272-1	14563	7377	17900	18003	13930	8518	6454	15945	16282
ADX17273-1	165	76	87	103	80	120	98	65	76
ADX17274-1	160	313	70	78	65	139	469	112	101
ADX17275-1	439	1778	251	270	247	481	1573	330	322
ADX17276-1	45	139	24	30	14	99	225	94	83
ADX17277-1	60	318	31	47	24	217	540	144	124
ADX17278-1	20	50	14	12	10	68	130	44	44
ADX17279-1	19	86	7	6	6	45	42	32	21
ADX17280-1	15	68	6	14	9	48	213	48	49
ADX17281-1	72	122	41	41	38	87	183	96	75
ADX17282-1	61	70	56	59	43	122	237	117	120
ADX17283-1	375	641	360	385	269	1005	1635	1315	1360
ADX17284-1	824	336	190	214	132	303	528	77	87
ADX17285-1	34	20	18	12	8	15	36	9	12
ADX17286-1	472	150	301	289	224	123	77	72	80
ADX17287-1	83	305	67	67	56	269	732	235	227
ADX17288-1	88	85	32	19	29	110	152	102	105
ADX17289-1	133	366	118	109	79	447	614	399	409
ADX17290-1	34	84	27	38	16	73	177	79	91
ADX17291-1	57	121	73	60	33	101	231	85	85
ADX17292-1	84	160	62	80	58	107	215	60	75
ADX17293-1	962	2531	656	651	556	853	4154	571	593
ADX17294-1	1217	694	923	911	739	1133	913	593	616
ADX17295-1	834	1133	644	630	503	905	986	483	529
ADX17296-1	542	152	385	408	259	470	332	410	380
ADX17297-1	125	204	107	106	99	300	746	385	396
ADX17298-1	130	194	146	129	99	262	320	267	266
ADX17299-1	69	269	44	54	34	139	474	158	154
ADX17300-1	42	57	16	22	15	284	747	1203	1216
ADX17301-1	73	81	15	18	12	46	309	117	142
ADX17302-1	30	17	34	25	21	67	49	46	53
ADX17303-1	617	645	452	429	333	729	593	246	225
ADX17304-1	149	925	98	95	83	121	487	66	57
ADX17305-1	223	1957	173	164	157	277	2807	177	155
ADX17306-1	396	851	249	332	249	711	4592	931	989
ADX17307-1	167	197	122	121	107	169	595	238	229
ADX17308-1	160	98	98	118	87	217	227	198	160
ADX17309-1	27	141	29	31	23	96	266	113	92
ADX17310-1	31	107	27	37	20	72	400	101	101
ADX17311-1	34	126	27	26	17	64	314	105	89
ADX17312-1	6	66	6	2	12	16	69	16	17
ADX17313-1	16	48	9	11	9	38	144	45	46
ADX17314-1	23	20	11	18	18	53	68	97	118
ADX17315-1	31	158	26	18	18	57	301	40	57
ADX17316-1	6	26	6	8	6	11	77	34	31
ADX17317-1	21	188	23	22	25	67	638	81	83
ADX17318-1	60	145	35	44	19	97	151	75	85
ADX17319-1	41	129	36	28	12	57	482	66	66
ADX17320-1	42	29	23	13	17	35	67	14	13
ADX17321-1	469	411	448	416	346	686	634	436	474
ADX17322-1	119	284	108	88	82	407	511	436	424
ADX17323-1	45	140	46	40	38	448	875	632	628
ADX17324-1	139	147	85	84	76	1978	5171	1728	1657
ADX17325-1	170	269	290	344	265	1650	1347	2751	2693
ADX17326-1	217	270	120	120	82	216	690	171	142
ADX17327-1	167	256	70	81	47	115	164	59	61
ADX17328-1	9	7	4	2	3	22	49	75	81
ADX17329-1	4	7	3	2	3	23	57	24	25
ADX17330-1	21	49	27	21	20	39	213	51	49
ADX17331-1	26	59	19	19	17	42	74	15	26
ADX17332-1	50	26	36	35	24	89	105	136	125
ADX17333-1	28	87	12	12	17	52	187	71	53
ADX17334-1	7	13	6	2	5	8	29	9	7
ADX17335-1	4	32	3	5	2	21	138	12	14
ADX17336-1	48	201	26	41	26	84	417	133	107
ADX17337-1	376	141	292	339	234	491	184	336	326
ADX17338-1	203	383	139	146	106	247	344	155	151
ADX17339-1	178	106	128	131	102	185	163	112	111
ADX17340-1	946	718	585	564	469	979	1358	671	620
ADX17341-1	98	159	117	97	59	154	193	103	111
ADX17342-1	104	124	77	50	40	108	265	100	115
ADX17343-1	45	31	17	28	15	43	104	38	35
ADX17344-1	26	8	25	17	15	29	41	24	15
ADX17345-1	398	1077	344	343	275	396	1126	294	281
ADX17346-1	320	592	586	629	459	265	357	267	287
ADX17347-1	162	117	142	140	109	200	297	163	157
ADX17348-1	48	33	59	49	62	87	81	93	87
ADX17349-1	47	134	16	27	17	45	437	34	37
ADX17350-1	315	367	198	209	161	346	708	315	288
ADX17351-1	119	214	180	169	149	926	2634	2249	2355
ADX17352-1	260	493	216	202	156	399	1426	395	352
ADX17353-1	371	205	222	205	161	322	257	146	144
ADX17354-1	258	306	104	94	69	235	370	195	190
ADX17355-1	98	294	86	95	66	171	602	98	104
ADX17356-1	188	662	123	147	99	288	729	230	193
ADX17357-1	125	172	92	102	82	120	191	97	114
ADX17358-1	90	201	61	65	50	164	357	184	165
ADX17359-1	2249	4016	1688	1760	1379	2336	3562	1127	1211
ADX17360-1	595	554	462	459	380	1154	2083	1654	1659
ADX17361-1	369	467	368	384	312	781	1211	904	934
ADX17362-1	132	416	114	137	89	190	577	135	143
ADX17363-1	65	124	62	49	42	129	252	123	110
ADX17364-1	46	45	30	31	32	40	67	33	52
ADX17365-1	15	22	7	6	2	9	87	21	16
ADX17366-1	9	39	4	8	6	13	103	12	16
ADX17367-1	14	69	9	16	10	41	107	25	23
ADX17368-1	10	79	4	8	3	23	335	19	24
ADX17369-1	19	53	10	9	3	24	122	37	29
ADX17370-1	351	509	304	288	203	937	1490	1437	1463
ADX17371-1	31	98	34	36	18	40	259	51	37
ADX17372-1	21	100	28	20	26	43	132	27	28
ADX17373-1	32	125	43	41	34	63	179	53	70
ADX17374-1	171	203	133	123	78	222	369	273	273
ADX17375-1	39	79	21	28	17	64	172	48	34
ADX17376-1	67	42	43	40	37	88	70	84	92
ADX17377-1	311	576	224	242	189	605	2171	630	646
ADX17378-1	106	479	105	114	63	184	450	178	127
ADX17379-1	79	106	50	50	33	108	256	115	104
ADX17380-1	2923	1348	1897	1871	1445	1557	1442	1455	1495
ADX17381-1	392	300	295	284	230	423	404	343	310
ADX17382-1	113	118	155	135	100	146	182	141	128
ADX17383-1	131	132	149	154	102	175	207	177	173
ADX17384-1	94	153	72	75	70	367	835	493	472
ADX17385-1	20	57	12	14	12	40	134	32	20
ADX17386-1	28	61	18	10	15	24	130	33	28
ADX17387-1	30	10	22	13	12	39	18	35	44
ADX17388-1	259	887	178	196	135	195	1757	268	299
ADX17389-1	82	169	54	54	38	94	239	78	70
ADX17390-1	527	506	324	351	281	444	953	239	253
ADX17391-1	192	125	115	106	100	162	111	90	97
ADX17392-1	162	159	150	139	101	197	247	121	126
ADX17393-1	227	111	183	177	124	247	158	97	108
ADX17394-1	132	126	103	75	84	112	112	41	60
ADX17395-1	103	171	47	46	38	97	227	58	70
ADX17396-1	27	56	9	19	14	33	303	99	96
ADX17397-1	4	2	1	1	2	0	14	8	7
ADX17398-1	55	371	41	37	24	87	443	46	36
ADX17399-1	2013	747	1485	1535	1164	1899	540	997	958
ADX17400-1	171	1089	101	98	74	144	1318	168	158
ADX17401-1	1240	788	942	893	746	1289	520	486	505
ADX17402-1	116	151	92	83	60	239	310	204	198
ADX17403-1	138	431	99	97	74	153	839	197	182
ADX17404-1	236	378	156	171	121	220	310	225	195
ADX17405-1	47	43	42	36	26	175	644	325	363
ADX17406-1	114	108	103	89	71	130	76	38	25
ADX17407-1	264	189	162	161	145	220	304	85	96
ADX17408-1	452	273	372	392	280	692	588	445	474
ADX17409-1	178	87	122	157	85	246	130	169	160
ADX17410-1	65	214	52	53	41	137	1511	148	167
ADX17411-1	373	137	277	310	237	350	118	204	191
ADX17412-1	177	272	176	177	134	1091	762	852	860
ADX17413-1	51	15	41	38	35	69	49	37	36
ADX17414-1	47	30	36	24	35	104	32	52	40
ADX17415-1	184	205	126	137	116	373	789	329	343
ADX17416-1	1744	708	1002	971	790	1744	858	946	957
ADX17417-1	482	1343	381	386	282	828	3254	732	685
ADX17418-1	328	326	244	240	197	428	537	289	283
ADX17419-1	114	100	94	100	76	259	197	164	157
ADX17420-1	149	148	113	139	101	233	374	239	262
ADX17421-1	966	237	375	413	323	659	113	171	186
ADX17422-1	149	65	148	143	130	208	169	130	141
ADX17423-1	205	427	185	194	134	328	816	270	249
ADX17424-1	36	17	22	13	15	42	16	16	14
ADX17425-1	40	41	15	10	8	32	93	25	29
ADX17426-1	36	102	19	15	9	41	242	42	25
ADX17427-1	60	29	44	35	28	53	76	64	73
ADX17428-1	60	61	35	31	24	76	205	79	70
ADX17429-1	42	131	27	38	31	62	275	58	62
ADX17430-1	2	9	0	9	3	35	227	419	483
ADX17431-1	3	1	2	6	0	22	90	205	226
ADX17432-1	1	8	0	1	1	13	121	106	125
ADX17433-1	51	486	40	41	30	135	1461	845	832
ADX17434-1	40	239	46	57	40	434	23687	7125	7267
ADX17435-1	27	37	26	51	37	120	124	137	146
ADX17436-1	369	855	308	287	238	504	2628	389	381
ADX17437-1	344	132	204	266	162	367	318	238	199
ADX17438-1	381	601	274	278	195	399	928	262	265
ADX17439-1	482	731	332	347	276	61	71	46	46
ADX17440-1	184	179	186	192	134	256	497	347	355
ADX17441-1	1179	5091	761	819	605	2140	3516	843	761
ADX17442-1	121	211	86	77	80	214	248	123	118
ADX17443-1	395	467	258	253	198	312	315	172	179
ADX17444-1	146	220	120	122	93	294	353	176	170
ADX17445-1	370	993	276	253	218	948	1136	660	660
ADX17446-1	89	137	68	60	58	585	394	346	411
ADX17447-1	68	108	67	55	45	583	464	328	365
ADX17448-1	92	113	59	59	44	777	450	611	571
ADX17449-1	327	605	229	212	173	2737	1857	2309	2401
ADX17450-1	71	52	61	48	37	101	63	45	48
ADX17451-1	1258	422	425	439	315	785	964	1147	1141
ADX17452-1	324	385	248	256	178	290	428	197	194
ADX17453-1	11769	5691	8404	8639	6582	12312	9988	14024	14604
ADX17454-1	579	340	495	486	412	874	515	521	586
ADX17455-1	237	244	214	204	155	371	584	281	276
ADX17456-1	256	299	227	219	186	449	468	406	397
ADX17457-1	298	1157	249	257	189	392	2415	219	238
ADX17458-1	399	311	302	302	238	568	438	393	382
ADX17459-1	71	288	79	80	56	172	752	174	212
ADX17460-1	8	16	9	9	4	24	83	27	16
ADX17461-1	12	61	7	8	8	27	163	41	33
ADX17462-1	3	13	2	1	1	12	27	23	18
ADX17463-1	6	28	6	8	6	19	45	37	33
ADX17464-1	43	269	32	33	29	97	550	107	118
ADX17465-1	20	120	22	20	12	88	5346	650	692
ADX17466-1	194	494	137	143	100	249	450	144	167
ADX17467-1	44	41	28	24	27	75	106	69	88
ADX17468-1	208	744	146	116	105	237	1418	232	219
ADX17469-1	280	328	194	191	160	264	525	226	204
ADX17470-1	37	52	31	33	31	508	1101	560	556
ADX17471-1	414	405	193	200	160	373	824	216	192
ADX17472-1	499	237	435	430	376	770	198	395	428
ADX17473-1	568	279	404	379	282	567	393	313	305
ADX17474-1	160	446	70	85	61	123	461	46	73
ADX17475-1	328	148	146	123	108	207	162	91	82
ADX17476-1	675	271	300	257	251	488	563	226	233
ADX17477-1	964	549	608	605	471	1004	656	511	547
ADX17478-1	76	473	51	65	41	122	417	77	73
ADX17479-1	82	80	64	56	47	144	167	121	146
ADX17480-1	946	9818	778	818	576	1237	14011	616	621
ADX17481-1	351	176	390	418	302	534	106	243	251
ADX17482-1	1311	769	1239	1277	918	1891	468	633	659
ADX17483-1	208	251	156	181	134	545	381	227	260
ADX17484-1	5	11	11	13	13	221	462	1008	1041
ADX17485-1	174	324	153	140	126	263	318	202	193
ADX17486-1	762	1271	536	594	446	890	1713	502	524
ADX17487-1	11	8	17	18	15	26	6	8	9
ADX17488-1	289	124	220	169	120	298	169	166	172
ADX17489-1	6	52	8	3	8	16	65	8	7
ADX17490-1	17	63	19	13	8	25	151	17	21
ADX17491-1	12	55	7	8	7	17	45	9	7
ADX17492-1	2	7	1	0	0	8	14	2	1
ADX17493-1	2	12	0	1	0	6	11	3	3
ADX17494-1	6	17	4	4	0	12	23	4	5
ADX17495-1	19	45	11	12	5	25	73	6	13
ADX17496-1	33	67	17	21	20	44	119	21	28
ADX17497-1	13	121	14	12	7	37	367	34	29
ADX17498-1	222	660	571	600	423	4351	1956	2248	2227
ADX17499-1	12	83	7	16	8	79	117	30	27
ADX17500-1	68	283	81	63	55	610	826	636	625
ADX17501-1	9	41	8	7	4	96	1049	155	147
ADX17502-1	495	797	349	311	224	651	1080	586	557
ADX17503-1	187	79	133	150	102	217	86	106	103
ADX17504-1	68	168	72	49	37	117	379	111	117
ADX17505-1	608	1087	454	517	335	914	2072	808	807
ADX17506-1	75	121	141	139	115	1368	341	401	377
ADX17507-1	90	166	110	113	102	1782	859	767	729
ADX17508-1	92	328	64	84	48	283	3069	588	612
ADX17509-1	352	951	251	270	231	583	2275	625	643
ADX17510-1	429	623	326	308	255	552	1019	282	282
ADX17511-1	1048	1920	651	704	532	1015	1071	400	420
ADX17512-1	40	33	38	22	27	49	34	13	22
ADX17513-1	279	150	296	281	230	759	529	823	815
ADX17514-1	25	49	16	28	15	87	321	154	165
ADX17515-1	385	1188	210	209	166	302	353	131	124
ADX17516-1	270	177	157	152	137	282	427	281	251
ADX17517-1	205	426	147	137	95	231	966	235	229
ADX17518-1	588	235	496	479	369	1268	697	989	989
ADX17519-1	1072	731	1098	1066	782	2321	1095	1839	1911
ADX17520-1	394	123	410	436	311	1056	309	830	813
ADX17521-1	164	51	66	65	40	162	53	56	69
ADX17522-1	0	0	0	0	0	0	0	0	0
ADX17523-1	377	398	178	169	156	642	1331	413	434
ADX17524-1	331	196	230	245	169	248	201	119	106
ADX17525-1	542	1658	365	377	296	468	337	110	138
ADX17526-1	377	870	284	295	220	361	564	147	163
ADX17527-1	988	1068	949	970	724	1064	2260	710	737
ADX17528-1	235	423	178	199	135	241	375	218	219
ADX17529-1	221	536	209	185	118	390	564	310	284
ADX17530-1	54	55	56	37	46	118	43	64	68
ADX17531-1	860	1076	1002	956	767	1640	803	856	854
ADX17532-1	44	231	57	52	36	165	890	193	157
ADX17533-1	121	128	92	88	70	182	164	111	127
ADX17534-1	71	305	80	72	60	156	816	151	146
ADX17535-1	412	241	374	382	309	1460	1206	2297	2427
ADX17536-1	205	275	211	197	157	671	638	840	853
ADX17537-1	309	273	270	272	215	961	834	1413	1503
ADX17538-1	38	34	17	23	20	66	64	54	40
ADX17539-1	145	104	96	103	76	219	100	80	78
ADX17540-1	299	513	138	131	94	181	110	42	52
ADX17541-1	138	328	72	75	57	189	413	78	86
ADX17542-1	2932	714	2963	3075	2329	10159	955	3539	3654
ADX17543-1	2439	10009	2677	2717	1892	7277	11917	3581	3759
ADX17544-1	176	50	88	68	49	216	256	152	154
ADX17545-1	894	1241	501	508	394	878	737	453	477
ADX17546-1	759	1289	456	487	378	1096	4011	1158	1151
ADX17547-1	32	172	56	63	38	737	3700	966	1066
ADX17548-1	773	1273	698	686	532	927	1915	685	742
ADX17549-1	47	179	42	37	38	71	198	58	54
ADX17550-1	631	465	601	602	481	805	597	598	621
ADX17551-1	2392	994	1523	1576	1234	2575	1364	1010	1027
ADX17552-1	2183	4206	1291	1296	1013	1736	2165	689	704
ADX17553-1	889	1179	626	670	522	831	1581	678	721
ADX17554-1	206	420	122	153	110	328	1176	283	338
ADX17555-1	399	419	262	279	248	652	707	462	484
ADX17556-1	349	422	209	201	164	244	160	84	89
ADX17557-1	48	36	30	20	14	270	2109	265	238
ADX17558-1	28	121	23	25	22	96	388	131	118
ADX17559-1	22	48	15	15	10	52	153	70	74
ADX17560-1	15	33	10	7	5	35	119	59	71
ADX17561-1	31	16	19	14	16	110	193	311	292
ADX17562-1	25	56	12	15	13	806	4860	3112	3160
ADX17563-1	18	9	4	7	4	25	76	20	20
ADX17564-1	128	193	69	73	61	198	401	124	109
ADX17565-1	158	363	140	138	91	445	833	305	296
ADX17566-1	30	32	35	18	29	76	255	140	133
ADX17567-1	32	251	22	14	13	49	746	44	44
ADX17568-1	13	21	11	5	4	20	75	28	34
ADX17569-1	5	24	3	4	0	12	38	11	11
ADX17570-1	48	135	30	36	30	107	469	127	132
ADX17571-1	15	60	5	7	9	22	200	37	38
ADX17572-1	19	25	8	6	9	39	99	53	52
ADX17573-1	5	60	1	1	3	22	115	17	18
ADX17574-1	17	11	12	11	6	62	211	177	179
ADX17575-1	6	21	5	5	2	5	18	7	5
ADX17576-1	19	24	11	17	7	158	459	664	693
ADX17577-1	23	73	10	14	15	32	151	40	36
ADX17578-1	21	101	21	9	5	44	80	17	20
ADX17579-1	1	1	1	2	0	2	5	1	6
ADX17580-1	163	212	84	94	51	55	346	34	32
ADX17581-1	36	8	18	17	17	13	11	32	34
ADX17582-1	10	29	4	3	5	6	49	4	11
ADX17583-1	3	9	3	0	2	6	80	6	4
ADX17584-1	5	42	6	4	4	10	64	7	5
ADX17585-1	29	148	15	17	23	56	319	35	55
ADX17586-1	11	2	11	10	11	53	8	29	39
ADX17587-1	126	134	117	124	76	164	164	84	82
ADX17588-1	375	763	329	357	283	503	478	274	301
ADX17589-1	114	162	104	72	61	159	229	141	131
ADX17590-1	291	1340	175	186	143	186	265	53	61
ADX17591-1	120	92	70	74	60	221	615	141	134
ADX17592-1	192	1223	172	162	130	357	1073	255	263
ADX17593-1	172	563	127	139	133	349	1299	374	376
ADX17594-1	131	111	115	95	78	202	202	115	147
ADX17595-1	192	313	179	189	163	576	858	519	480
ADX17596-1	248	292	181	154	127	271	560	179	197
ADX17597-1	49	162	50	56	43	83	344	178	162
ADX17598-1	195	99	137	155	140	211	152	187	183
ADX17599-1	213	791	129	134	111	230	934	141	138
ADX17600-1	524	365	514	542	388	547	346	443	468
ADX17601-1	108	334	135	155	100	241	1336	247	284
ADX17602-1	359	397	520	539	430	622	588	712	743
ADX17603-1	394	624	261	270	188	506	769	271	285
ADX17604-1	398	175	214	238	165	555	279	337	321
ADX17605-1	365	1110	269	249	200	581	1749	365	323
ADX17606-1	105	68	74	66	51	124	95	69	54
ADX17607-1	142	111	117	89	80	152	184	67	83
ADX17608-1	224	169	210	177	152	293	134	178	160
ADX17609-1	278	766	201	182	156	335	763	184	196
ADX17610-1	4	29	7	3	2	17	127	15	15
ADX17611-1	107	96	39	38	31	61	165	29	29
ADX17612-1	727	236	419	433	318	619	82	143	141
ADX17613-1	724	365	402	410	326	716	429	266	282
ADX17614-1	774	385	496	494	394	735	263	211	233
ADX17615-1	1698	677	888	838	663	1589	879	630	602
ADX17616-1	112	243	71	96	64	167	376	172	166
ADX17617-1	69	114	55	57	55	143	201	89	112
ADX17618-1	233	827	205	209	171	402	1602	310	312
ADX17619-1	485	667	362	345	240	519	345	232	200
ADX17620-1	419	168	267	295	220	390	114	129	121
ADX17621-1	123	228	91	116	59	136	362	95	84
ADX17622-1	125	299	63	80	55	101	172	47	46
ADX17623-1	896	695	705	642	533	1016	796	510	536
ADX17624-1	94	163	52	64	30	82	264	51	49
ADX17625-1	155	250	76	73	52	114	323	70	79
ADX17626-1	113	70	71	62	47	83	218	92	73
ADX17627-1	973	501	540	491	429	927	638	554	602
ADX17628-1	1170	2187	707	656	491	1139	1836	681	656
ADX17629-1	913	674	941	892	740	1489	1005	1216	1203
ADX17630-1	485	271	479	445	363	865	714	927	927
ADX17631-1	918	601	936	816	763	1461	1199	1735	1607
ADX17632-1	613	301	641	594	502	1108	699	1543	1618
ADX17633-1	1222	2020	1256	1255	1015	3080	4504	4431	4277
ADX17634-1	1151	687	1334	1287	976	2610	1984	2847	2890
ADX17635-1	2813	1510	2319	2333	1724	4503	2885	4545	4631
ADX17636-1	1033	3145	909	810	726	1614	5980	1695	1635
ADX17637-1	996	356	761	740	637	1765	1003	2071	2137
ADX17638-1	689	5150	637	664	485	1638	13271	1741	1741
ADX17639-1	272	153	251	245	174	932	357	1021	958
ADX17640-1	51	108	57	67	38	84	171	110	129
ADX17641-1	44	159	48	34	40	231	296	251	227
ADX17642-1	21	33	21	18	11	130	176	122	136
ADX17643-1	22	86	8	8	8	39	236	25	33
ADX17644-1	28	68	31	27	23	188	163	204	182
ADX17645-1	28	71	22	29	15	64	172	55	65
ADX17646-1	350	509	235	221	172	344	724	209	197
ADX17647-1	455	334	418	426	320	2344	1282	1205	1225
ADX17648-1	20	59	22	10	12	94	162	51	71
ADX17649-1	353	328	181	177	164	197	300	109	94
ADX17650-1	216	120	96	99	83	297	260	381	389
ADX17651-1	348	260	182	195	146	393	438	407	403
ADX17652-1	179	315	119	116	78	283	700	263	297
ADX17653-1	254	406	154	137	116	383	1390	395	473
ADX17654-1	252	414	208	203	169	490	1095	351	356
ADX17655-1	646	683	442	439	368	867	1354	632	583
ADX17656-1	787	2165	489	493	421	1031	3963	944	982
ADX17657-1	758	188	408	433	338	635	143	191	231
ADX17658-1	214	307	211	219	151	392	534	562	529
ADX17659-1	120	241	80	83	74	236	419	212	208
ADX17660-1	70	36	42	58	52	143	80	160	192
ADX17661-1	92	72	75	66	41	165	162	144	124
ADX17662-1	514	253	567	560	430	1043	620	1092	1020
ADX17663-1	838	336	794	794	687	1302	577	1451	1580
ADX17664-1	3240	15093	2910	2700	2246	5135	29290	4381	4481
ADX17665-1	0	0	0	0	0	0	0	0	0
ADX17666-1	609	786	610	625	489	850	752	535	546
ADX17667-1	16828	6228	16946	17313	13478	19596	13011	34745	35718
ADX17668-1	2042	15903	1689	1765	1303	2262	21178	3314	3451
ADX17669-1	2174	972	1997	1928	1543	3660	1936	4524	4612
ADX17670-1	879	229	984	1004	795	1663	515	1876	1994
ADX17671-1	590	161	549	558	404	968	289	974	938
ADX17672-1	225	302	126	122	89	237	415	105	128
ADX17673-1	160	620	155	143	130	291	787	156	151
ADX17674-1	128	182	53	57	57	176	169	46	36
ADX17675-1	62	71	28	46	23	84	117	38	23
ADX17676-1	872	3498	614	611	442	847	3794	651	623
ADX17677-1	0	11	1	1	0	0	9	5	3
ADX17678-1	2186	937	1470	1484	1221	2172	1002	1566	1524
ADX17679-1	1332	466	933	995	765	1328	541	1188	1262
ADX17680-1	813	462	615	572	546	852	552	685	682
ADX17681-1	1221	914	1025	1011	839	1463	853	1236	1259
ADX17682-1	355	159	302	357	254	445	225	303	282
ADX17683-1	760	429	733	725	581	958	346	671	655
ADX17684-1	751	1001	508	515	426	684	1369	559	556
ADX17685-1	1178	494	922	944	715	1138	538	664	620
ADX17686-1	395	245	330	298	270	361	266	426	467
ADX17687-1	288	117	204	210	166	240	261	285	261
ADX17688-1	475	202	355	366	331	518	182	299	332
ADX17689-1	163	67	122	113	88	152	115	95	87
ADX17690-1	210	101	177	174	140	234	131	143	147
ADX17691-1	125	56	101	95	47	106	56	39	50
ADX17692-1	311	329	256	273	192	344	362	342	344
ADX17693-1	19	91	21	15	14	95	618	208	224
ADX17694-1	9	24	6	5	7	51	55	40	56
ADX17695-1	113	168	67	80	44	355	358	258	257
ADX17696-1	62	1222	60	89	54	578	6437	523	539
ADX17697-1	143	245	103	100	77	205	502	167	145
ADX17698-1	35	74	29	23	24	45	104	31	27
ADX17699-1	55	20	29	25	27	35	58	46	26
ADX17700-1	253	654	180	200	146	339	919	204	198
ADX17701-1	114	87	47	36	38	75	228	40	40
ADX17702-1	154	104	31	29	26	10	42	10	10
ADX17703-1	3	24	2	3	2	10	55	3	12
ADX17704-1	61	256	33	44	22	114	620	82	94
ADX17705-1	147	16	25	43	31	69	16	31	29
ADX17706-1	48	222	40	42	29	78	302	42	55
ADX17707-1	32	41	21	24	17	49	63	19	29
ADX17708-1	7	5	2	2	2	10	9	2	2
ADX17709-1	78	171	22	22	11	68	861	213	196
ADX17710-1	13	35	7	9	8	49	74	69	71
ADX17711-1	24	71	21	18	12	49	157	54	85
ADX17712-1	9	49	7	5	2	21	89	16	25
ADX17713-1	9	46	7	10	3	26	58	24	21
ADX17714-1	11	24	5	11	4	29	27	25	23
ADX17715-1	28	86	20	17	15	48	143	61	59
ADX17716-1	29	33	20	19	8	66	107	55	75
ADX17717-1	65	136	44	52	30	160	292	142	155
ADX17718-1	12	20	6	13	4	26	30	21	27
ADX17719-1	29	103	24	27	17	81	169	87	101
ADX17720-1	27	93	42	43	37	92	197	103	121
ADX17721-1	8	13	10	9	3	22	62	27	30
ADX17722-1	3	2	3	3	3	19	19	23	17
ADX17723-1	5	38	7	4	8	16	34	18	16
ADX17724-1	13	22	8	15	12	38	23	22	26
ADX17725-1	7	11	4	9	5	13	20	18	12
ADX17726-1	10	27	17	13	8	65	163	79	68
ADX17727-1	12	30	7	7	6	38	64	49	50
ADX17728-1	13	16	16	16	9	60	99	43	50
ADX17729-1	5	10	7	6	2	15	96	12	8
ADX17730-1	87	245	45	51	43	130	176	99	92
ADX17731-1	18	33	20	18	5	57	39	51	48
ADX17732-1	13	19	11	6	7	32	65	39	60
ADX17733-1	13	45	16	11	9	50	55	49	44
ADX17734-1	10	52	9	8	5	37	123	39	27
ADX17735-1	4	16	6	4	1	29	24	21	17
ADX17736-1	7	13	7	3	4	13	36	16	16
ADX17737-1	43	14	23	21	24	96	55	103	127
ADX17738-1	371	282	294	287	209	784	454	562	593
ADX17739-1	17	18	17	12	12	18	53	16	14
ADX17740-1	26	52	15	21	21	52	55	41	38
ADX17741-1	32	96	28	33	21	61	83	52	57
ADX17742-1	31	70	16	11	13	48	140	29	27
ADX17743-1	35	26	25	13	21	52	28	34	43
ADX17744-1	184	785	116	103	92	235	1669	186	163
[truncated: 3,209 more rows]

## Sheet: GSE49829_tpm
gene_id	Culture condition in LB
	OD0.3	OD0.3	OD0.3	OD2.0	OD2.0	OD2.0
ADX15747	0.15007	0.16804	0.180974	0.632535	0.135219	0.140268
ADX15748	0.00101141	0.00125089	0.00130888	0.0050244	0.00188958	0.0017482
ADX15749	0.00330065	0.00293934	0.00282012	0.0122926	0.00431018	0.00482753
ADX15750	0.00462472	0.00392743	0.00374852	0.00843149	0.00620147	0.00544186
ADX15751	0.00702835	0.00855246	0.00698186	0.0134124	0.00685655	0.00675812
ADX15752	0.00323448	0.00288874	0.00312877	0.00327259	0.00216665	0.00217609
ADX15753	0.044501	0.0460245	0.0449893	0.0186621	0.0276696	0.0271492
ADX15754	0.0066272	0.00675094	0.00697158	0.0168535	0.00867347	0.00963391
ADX15755	0.00712637	0.00765386	0.00703575	0.00644565	0.00114483	0.00159634
ADX15756	0.000692708	0.000403137	0.000734893	0.00452177	0.000932105	0.00105986
ADX15757	0.0015791	0.00127049	0.00123213	0.0094923	0.00119264	0.000975907
ADX15758	0.00164634	0.00180675	0.00188632	0.0107241	0.0014621	0.00157707
ADX15759	0.078332	0.0789851	0.0773388	0.0172342	0.0149151	0.0154075
ADX15760	0.517261	0.515222	0.496363	0.164182	0.12259	0.132088
ADX15761	0.00164417	0.0020369	0.0014261	0.00390321	0.000787707	0.000634611
ADX15762	0.000260771	0.000151762	0.000387313	0.00392409	0.000456161	0.000485721
ADX15763	0.000658056	0.00095494	0.000380798	0.0203228	0.00111087	0.000573062
ADX15764	0.000308881	0.000269641	4.92e-05	0.000573046	0.000249377	0.000369856
ADX15765	0.0049706	0.00463458	0.00479032	0.0262763	0.00633837	0.00511745
ADX15766	0.000490215	0.000489071	0.000411894	0.00493131	0.000498681	0.000563506
ADX15767	8.24e-05	8.91e-05	0.00011368	0.000543718	0.000110913	0.000104181
ADX15768	0.000263086	0.000408291	0.000446573	0.00243441	0.000542812	0.000466698
ADX15769	0.000949225	0.000909131	0.00145013	0.00666845	0.000766364	0.00118207
ADX15770	0.00168326	0.0013543	0.00172816	0.0175953	0.00203849	0.0019722
ADX15771	0.000353325	0.000360334	0.000429818	0.00137898	0.000190173	0.000231907
ADX15772	0.000245234	0.000183496	0.000130084	0.000657173	0.000131994	0.000114195
ADX15773	0.00086848	0.000753439	0.000865286	0.012921	0.00158526	0.00168799
ADX15774	0.000794564	0.000435991	0.00106212	0.00743602	0.00147544	0.00120513
ADX15775	0.000816412	0.00134815	0.00136191	0.0101904	0.000863695	0.00121354
ADX15776	0.000608852	0.000340162	0.000434065	0.00118479	0.000255612	0.000427705
ADX15777	0.000312754	0.000312024	0.000238896	0.00123783	0.000101002	9.99e-05
ADX15778	0.0011	0.000960257	0.00105029	0.00411931	0.00136915	0.0011708
ADX15779	8.2e-05	6.13e-05	5.22e-05	0.000101406	0.000148937	0.000229072
ADX15780	0.0028998	0.00242641	0.00202446	0.0448509	0.00404041	0.00485366
ADX15781	0.00124577	0.00103971	0.00093023	0.0186674	0.00208894	0.0021228
ADX15782	0.000314386	0.000300584	0.000383562	0.00332674	0.000486492	0.000397362
ADX15783	0.00149086	0.00143426	0.00199966	0.0165515	0.0038689	0.00412288
ADX15784	0.00068919	0.000728837	0.000737009	0.00276179	0.000612065	0.000693201
ADX15785	0.000415043	0.000345062	0.000418302	0.00249537	0.000460746	0.000704047
ADX15786	0.00182306	0.00188435	0.00213271	0.0208281	0.00253266	0.00281881
ADX15787	0.00353986	0.00397455	0.00339135	0.0113585	0.00670404	0.00599637
ADX15788	0.00506538	0.00415555	0.00440394	0.0100123	0.00524377	0.00594555
ADX15789	0.00153371	0.00143878	0.00113655	0.00553035	0.00136762	0.000895395
ADX15790	0.000160305	0.000199914	0.000229591	0.00153659	0.000331648	0.000407895
ADX15791	0.166013	0.167465	0.160151	0.110339	0.0316685	0.032018
ADX15792	0.194368	0.192978	0.192159	0.0985853	0.0250801	0.0241732
ADX15793	0.0919843	0.0971174	0.0965095	0.0457756	0.0446667	0.0437055
ADX15794	0.048179	0.0485263	0.0510572	0.0303191	0.019998	0.0200531
ADX15795	0.00562164	0.00559422	0.0055958	0.00205751	0.00270352	0.00285626
ADX15796	0.0144466	0.0146593	0.014881	0.0023756	0.00505089	0.00407409
ADX15797	0.0280042	0.0269786	0.0281828	0.0128114	0.0117673	0.0114885
ADX15798	0.00353096	0.00356595	0.00377816	0.0125031	0.00255343	0.00254198
ADX15799	0.0182228	0.0186505	0.0167993	0.0300512	0.0163611	0.0159262
ADX15800	0.000959129	0.00109119	0.000985405	0.00154007	0.00139928	0.00104772
ADX15801	0.00360136	0.00348138	0.00395832	0.0470508	0.00554428	0.00580329
ADX15802	0.000359986	0.00026936	0.000229145	0.000371032	0.000411736	0.000191577
ADX15803	0	0	0	2.05e-05	0	0
ADX15804	3.16e-05	3.16e-05	0	2.61e-05	2.55e-05	2.53e-05
ADX15805	0.000139127	0.000208204	0.000191879	0.00244729	0.000402499	0.000296163
ADX15806	0.0015499	0.00154628	0.00208276	0.00816478	0.00166843	0.000687354
ADX15807	4.61e-05	1.53e-05	1.96e-05	2.53e-05	3.72e-05	0
ADX15808	0.000216416	5.89e-05	0.000100187	0.000535336	0.000127073	0.000141348
ADX15809	0.00189638	0.00175181	0.00143066	0.00602296	0.00136094	0.000953147
ADX15810	0.000118407	4.73e-05	0.000150742	0.000468636	9.56e-05	0.00013233
ADX15811	0.000270779	0.000148581	0.000120653	0.00337138	0.000120238	0.000183732
ADX15812	0.00769386	0.0077877	0.00751258	0.0167222	0.0151372	0.0148774
ADX15813	0.000770345	0.00043917	0.000420304	0.00419223	0.00271878	0.00300444
ADX15814	0.00443669	0.00385116	0.00360594	0.00407162	0.00647592	0.00632299
ADX15815	0.0327771	0.0306102	0.0365832	0.0505354	0.0323233	0.0286739
ADX15816	0.00078814	0.000524201	0.00051283	0.00384139	0.00176753	0.00157986
ADX15817	8.93e-05	8.91e-05	8.12e-05	0.00132509	0.000190501	0.000198538
ADX15818	0.000573092	0.000415822	0.000265306	0.00111692	0.000883317	0.000665428
ADX15819	0.00162286	0.00168797	0.00127478	0.00885439	0.00167263	0.00184674
ADX15820	0.000629173	0.000523088	0.000533991	0.0087977	0.00220119	0.00182066
ADX15821	7.95e-05	0.000132204	6.75e-05	0.000644652	0.000149779	7.4e-05
ADX15822	3.6e-05	0	0	0.000148586	0	0
ADX15823	9.5e-05	0.000162409	6.91e-05	0.000458609	0.000120476	0.000162437
ADX15824	0.000444956	0.000332938	0.000424847	0.00541159	0.000898096	0.000621591
ADX15825	0.000133631	0.000213311	0.00037427	0.00132222	0.000258932	0.00040536
ADX15826	4.37e-05	4.36e-05	2.78e-05	0.000198357	0.000123596	5.24e-05
ADX15827	4.8e-05	3.19e-05	0	0.000197922	3.88e-05	5.11e-05
ADX15828	0.00394375	0.00450685	0.00383399	0.0285568	0.00382082	0.00309094
ADX15829	0.00438745	0.00281392	0.00172886	0.0262711	0.0129039	0.0136759
ADX15830	0.000368583	0.000413689	0.000293272	0.00758519	0.00122751	0.00105432
ADX15831	0.00156496	0.0020297	0.00139462	0.00793586	0.00549614	0.00568413
ADX15832	0.00509533	0.0044912	0.00510123	0.0300621	0.00459303	0.00477827
ADX15833	0.00241018	0.00295945	0.00236026	0.0110831	0.0099539	0.00969386
ADX15834	0.00369007	0.00460182	0.0046074	0.0110588	0.0100262	0.00963007
ADX15835	0.00393282	0.00342368	0.00370308	0.00163487	0.00267384	0.00231328
ADX15836	0.011338	0.0103043	0.0107267	0.0562203	0.010878	0.0119024
ADX15837	0.00301725	0.00291098	0.0028422	0.00556809	0.00165077	0.00151749
ADX15838	0.0286992	0.0279036	0.0269647	0.0563256	0.0210199	0.0196859
ADX15839	0.0269617	0.0246956	0.0256119	0.209966	0.0206509	0.0209415
ADX15840	0.0571523	0.0546773	0.0545521	0.0314616	0.0340228	0.0339013
ADX15841	0.0399051	0.0386867	0.0404631	0.0412536	0.0283524	0.0285335
ADX15842	0.00553495	0.00556356	0.00585436	0.00382607	0.00519107	0.00490009
ADX15843	0.00336052	0.00379971	0.00334108	0.0025466	0.00143409	0.00148182
ADX15844	0.00314792	0.00334067	0.00311945	0.00268908	0.00166148	0.00171935
ADX15845	0.00458724	0.0051328	0.00535594	0.0351282	0.00470616	0.00408671
ADX15846	0.00149894	0.0015266	0.00123242	0.0128487	0.00181527	0.00199427
ADX15847	0.000106224	4.95e-05	8.11e-05	0.00033867	5.15e-05	3.39e-05
ADX15848	8.75e-05	0.000130995	0.000133725	0.0292024	0.000657241	0.000887421
ADX15849	0.000265538	0.000298034	0.000549332	0.00533688	0.000803941	0.000768395
ADX15850	0.00216106	0.00176402	0.00150065	0.0164826	0.00309297	0.00270529
ADX15851	0.00192467	0.00174294	0.00147016	0.00581081	0.0035142	0.00427831
ADX15852	0.0023018	0.00209139	0.00221522	0.00159292	0.00100662	0.00130153
ADX15853	0.00138479	0.0015017	0.00134904	0.00137019	0.00085553	0.000711325
ADX15854	0.00506565	0.005394	0.00579787	0.0028716	0.00202523	0.00194411
ADX15855	0.00474905	0.00468443	0.00481623	0.00325212	0.00207955	0.00237742
ADX15856	0.351069	0.337589	0.351814	11.3699	0.2194	0.192254
ADX15857	0.00129099	0.00140275	0.00138317	0.0102233	0.00149636	0.00149993
ADX15858	0	0	0	0	0	0
ADX15859	0.00242108	0.00345062	0.00242175	0.095965	0.0041886	0.00303707
ADX15860	0.000161357	0.000260045	0.00020542	0.00077781	0.000280587	0.000336878
ADX15861	0.00302635	0.00258797	0.00275199	0.0078426	0.00321126	0.00345121
ADX15862	0.00747053	0.00506249	0.00610112	0.0277773	0.00739699	0.00787633
ADX15863	0.00400657	0.00272538	0.00370958	0.0255279	0.00514617	0.00377984
ADX15864	0.00731327	0.0075677	0.00749159	0.116817	0.0352618	0.0345662
ADX15865	8.82e-05	2.93e-05	7.49e-05	0.00185442	0.000201751	0.000176012
ADX15866	0.00169764	0.0017125	0.00194511	0.00804101	0.00290873	0.00221346
ADX15867	0.000969358	0.000862546	0.000850506	0.0109955	0.00106817	0.000982947
ADX15868	0.0603019	0.0642197	0.0633648	0.0887889	0.130407	0.131231
ADX15869	0.0164634	0.0167655	0.0169718	0.0427276	0.0108442	0.0103856
ADX15870	0.0116146	0.0113731	0.0110783	0.00634844	0.00744003	0.00735628
ADX15871	0.0106253	0.0116252	0.0121692	0.0131579	0.0122139	0.0137791
ADX15872	0.0354602	0.0363386	0.0348101	0.0189291	0.0514661	0.0549283
ADX15873	0.0442138	0.041959	0.0458767	0.0207476	0.0262644	0.0255025
ADX15874	0.0173644	0.017913	0.0179578	0.00815067	0.00955217	0.00860668
ADX15875	0.0324193	0.0339187	0.0351712	0.0160388	0.0218496	0.0217387
ADX15876	0.0100565	0.0101028	0.010622	0.00608216	0.00816627	0.00789761
ADX15877	0.00762552	0.00804956	0.00826314	0.00741732	0.00396654	0.00422018
ADX15878	0.00962282	0.00946431	0.0101285	0.00982126	0.00835633	0.00821388
ADX15879	0.0149494	0.0146109	0.0161261	0.0287462	0.0102729	0.010051
ADX15880	0.0119628	0.0124654	0.0131194	0.0262265	0.0203266	0.0200104
ADX15881	0.0103889	0.0111403	0.0100879	0.0071066	0.0102039	0.00995702
ADX15882	0.0257288	0.0267464	0.0250694	0.0166028	0.0209125	0.021801
ADX15883	0.0155425	0.014337	0.0150977	0.00892718	0.0142943	0.0137436
ADX15884	0.0588521	0.0602993	0.060229	0.0291601	0.0452933	0.0474441
ADX15885	0.0102648	0.00927615	0.00962732	0.00410925	0.00432384	0.00417621
ADX15886	0.0299393	0.0304064	0.0307869	0.0128273	0.012336	0.0119368
ADX15887	0.00194886	0.00139134	0.00136571	0.000884546	0.00147238	0.00112754
ADX15888	0.00168314	0.00226134	0.00185707	0.00103625	0.000996524	0.000716587
ADX15889	0.0102689	0.0109885	0.0106483	0.00860377	0.00605085	0.00608191
ADX15890	0.00220627	0.00259581	0.00249883	0.00181291	0.00108103	0.00117818
ADX15891	0.146819	0.134832	0.138033	0.22439	0.122255	0.118672
ADX15892	0.000989886	0.000883622	0.00072959	0.00335075	0.000294439	0.000499071
ADX15893	0.00150842	0.00171989	0.00109734	0.0310942	0.0022617	0.00180619
ADX15894	0.000193882	0.000165797	0.000387871	0.000776488	0.000111809	0.00013266
ADX15895	0.00481288	0.00486788	0.00549332	0.00916849	0.00343015	0.00280862
ADX15896	0.00201254	0.00198816	0.00185879	0.0125271	0.0014974	0.0016538
ADX15897	0.00342416	0.00386028	0.00320403	0.00379745	0.00337272	0.00315708
ADX15898	0.00118869	0.0011118	0.00126738	0.0154003	0.000755762	0.000747256
ADX15899	0.00103602	0.00136248	0.00113908	0.00924145	0.00167288	0.00150369
ADX15900	0.00266319	0.0025911	0.00218558	0.0139922	0.00216792	0.0022665
ADX15901	0.0717896	0.0714398	0.0760839	0.0133518	0.00858774	0.00811176
ADX15902	0.240179	0.24284	0.247049	0.0211213	0.0262062	0.024911
ADX15903	0.19743	0.193512	0.205151	0.0172007	0.0243275	0.0255236
ADX15904	0.102164	0.102481	0.103585	0.0181271	0.0354275	0.0362906
ADX15905	7.49e-05	0.000134582	7.63e-05	2.47e-05	2.42e-05	1.2e-05
ADX15906	0.000511787	0.00032248	0.000480085	4.44e-05	6.52e-05	0.000107512
ADX15907	0.00330737	0.00164983	0.00280703	0.015908	0.00103842	0.00220015
ADX15908	0.0129364	0.0133842	0.0131732	0.0101505	0.0148928	0.0147375
ADX15909	0.00732092	0.00760818	0.00707329	0.00499445	0.00590181	0.00622672
ADX15910	0.00131234	0.00169775	0.00163399	0.00347219	0.00252656	0.0027629
ADX15911	0.0266767	0.0324444	0.0278161	0.0199014	0.0182557	0.0176446
ADX15912	0.032155	0.0285512	0.0311112	0.0190896	0.0129803	0.0107807
ADX15913	0.0122461	0.0117838	0.0120847	0.0339371	0.00497273	0.00607365
ADX15914	0.0111872	0.0116542	0.0116918	0.00656432	0.00739368	0.00772583
ADX15915	0.0045485	0.00429282	0.00476161	0.000699128	0.000934061	0.000885594
ADX15916	0.00943417	0.00919271	0.00936565	0.011084	0.00337426	0.00286803
ADX15917	0.0108012	0.0123641	0.0107112	0.0148123	0.00605843	0.00544567
ADX15918	0.00302695	0.00297936	0.00312939	0.00725309	0.0020994	0.0018163
ADX15919	0.00137626	0.00155074	0.00136045	0.0532153	0.00682369	0.00735436
ADX15920	0.0241591	0.0247502	0.0216947	0.0915576	0.00877219	0.00874031
ADX15921	0.0391461	0.0400988	0.0360705	0.0154863	0.0103761	0.010345
ADX15922	0.00365449	0.00351668	0.00389354	0.00777903	0.0026366	0.00250348
ADX15923	0.00181863	0.00148016	0.00158412	0.00276232	0.0014876	0.00143265
ADX15924	0.00338045	0.0034909	0.00302005	0.00914443	0.00411778	0.0036927
ADX15925	0.000345117	0.000408074	0.00037427	0.00281404	0.000350871	0.000408143
ADX15926	3.44e-05	3.44e-05	7.67e-05	0.000333691	8.34e-05	5.5e-05
ADX15927	0.000899441	0.000538406	0.000732837	0.00670436	0.00124901	0.00152215
ADX15928	0.000528469	0.000775348	0.000712357	0.0421394	0.00225881	0.00215894
ADX15929	0.00455587	0.00509954	0.00444193	0.0126989	0.00265549	0.00234176
ADX15930	0.0123475	0.0112522	0.0111601	0.00401075	0.00791899	0.00812854
ADX15931	0.00556916	0.00519464	0.00475903	0.00597595	0.00247913	0.0025578
ADX15932	0.001754	0.00166121	0.00176992	0.0013063	0.000763523	0.000780738
ADX15933	0.0021694	0.00255513	0.00264674	0.0010683	0.00109468	0.000962095
ADX15934	0.0461982	0.0464333	0.0426279	0.0165908	0.0192657	0.0190489
ADX15935	0.00654793	0.00816582	0.00601384	0.00848427	0.00479563	0.00548837
ADX15936	0.026825	0.0259605	0.0259218	0.0519135	0.0232391	0.0227369
ADX15937	0.0117518	0.0112922	0.0118585	0.045949	0.0166148	0.0178112
ADX15938	0.00339774	0.00353406	0.00340525	0.00878231	0.00402723	0.00352024
ADX15939	0.0125661	0.013004	0.0127848	0.0240048	0.00993526	0.00961575
ADX15940	0.0375925	0.0374191	0.0379584	0.0788205	0.0340967	0.0317581
ADX15941	0.022582	0.0222397	0.0209887	0.00964502	0.00155837	0.00141339
ADX15942	0.0056642	0.00604372	0.00615299	0.000685233	0.000194222	0.00015712
ADX15943	0.0143141	0.0147148	0.0139026	0.00886095	0.000843033	0.000520965
ADX15944	0.0168692	0.0162515	0.0174168	0.00518616	0.00121686	0.00101806
ADX15945	0.000194143	0.000426119	0.000444887	0.00115258	0.000438881	0.000433941
ADX15946	0.000299455	0.000348549	0.000254153	0.00498631	0.00049025	0.000464811
ADX15947	3.26e-05	4.88e-05	2.08e-05	0.000470975	4.61e-05	3.26e-05
ADX15948	1.88e-05	9.38e-06	3.59e-05	0.00017829	2.28e-05	3.75e-05
ADX15949	0.000154925	0.000154564	0.000230103	0.00125614	0.00025016	0.00030918
ADX15950	2.31e-05	0.000115344	8.83e-05	0.000247855	3.73e-05	3.69e-05
ADX15951	0.000820367	0.00104802	0.00090429	0.0139164	0.00214853	0.00185282
ADX15952	0.0219757	0.022731	0.0204445	0.0284829	0.0119864	0.0119101
ADX15953	0.00145611	0.00140635	0.0016664	0.0124853	0.00323291	0.00274517
ADX15954	0.0448589	0.0496946	0.0479918	0.0201735	0.0114562	0.0105622
ADX15955	0.00795837	0.009223	0.00926173	0.0139527	0.00399144	0.0033048
ADX15956	0.00518803	0.00534847	0.00478846	0.0193926	0.00293202	0.00352024
ADX15957	0.00904708	0.00813501	0.00810684	0.0137029	0.0057368	0.00551725
ADX15958	0.00409622	0.00384195	0.00424679	0.033573	0.00605974	0.00648104
ADX15959	0.00573967	0.00614332	0.00519885	0.0141714	0.00829441	0.00868875
ADX15960	0.000753074	0.000809112	0.000811226	0.00537357	0.00180062	0.00215029
ADX15961	0.0319004	0.0323538	0.0314522	0.343689	0.186308	0.191728
ADX15962	0.00637526	0.00550355	0.00571919	0.0618004	0.0106409	0.0110749
ADX15963	0.0176981	0.0167843	0.0180445	0.0125567	0.0122326	0.013019
ADX15964	0.0112036	0.012001	0.011523	0.00899479	0.0049035	0.00494245
ADX15965	0.00689139	0.00752495	0.00661449	0.010067	0.00383334	0.00392014
ADX15966	0.10453	0.1043	0.103336	0.0122656	0.0279188	0.0284626
ADX15967	0.10592	0.104927	0.10543	0.0195351	0.0360154	0.0368169
ADX15968	0.0577644	0.0585444	0.0554457	0.030115	0.0149286	0.0163464
ADX15969	0.0394501	0.0393423	0.0395702	0.0125732	0.0190029	0.020279
ADX15970	0.00964026	0.0118852	0.00960203	0.00825775	0.00481909	0.00478479
ADX15971	0.00570323	0.0054755	0.00529646	0.00309497	0.00252847	0.00237746
ADX15972	0.0131406	0.0124377	0.0106907	0.0537266	0.00744944	0.00804836
ADX15973	0.385023	0.406566	0.369527	0.429541	0.270087	0.268384
ADX15974	0.119019	0.120157	0.117407	0.0436267	0.0591257	0.0595252
ADX15975	0.0671787	0.0695793	0.0702845	0.0125818	0.0267281	0.0253462
ADX15976	0.0577921	0.0577139	0.0552165	0.184828	0.0331379	0.0326516
ADX15977	0.0233871	0.0225954	0.0228123	0.0152321	0.0145267	0.0159264
ADX15978	0.0133352	0.0136303	0.0137347	0.0210404	0.00859912	0.00883198
ADX15979	0.0174299	0.0164954	0.0167977	0.00870813	0.0133926	0.0129168
ADX15980	0.00626741	0.00663611	0.00651152	0.00520738	0.00558349	0.00517561
ADX15981	0.0261198	0.0251021	0.0265671	0.0333221	0.0123996	0.0117862
ADX15982	0.00582253	0.00643833	0.00628383	0.00275545	0.00424661	0.0040491
ADX15983	0.00589796	0.00673085	0.00729248	0.0414592	0.00606354	0.00680821
ADX15984	0.00568187	0.0059891	0.0055465	0.012118	0.00491149	0.00501648
ADX15985	0.00413324	0.00416701	0.00420955	0.010547	0.00368827	0.00388987
ADX15986	0.00791307	0.00711297	0.00741416	0.0139108	0.00430129	0.00469067
ADX15987	0.00675815	0.00715373	0.00607048	0.00715398	0.0125045	0.0129648
ADX15988	0.0104277	0.00999002	0.00949491	0.0701234	0.0175347	0.0191014
ADX15989	0.000608747	0.00068398	0.000639549	0.000643265	0.000496248	0.000471791
ADX15990	0.00360512	0.00304007	0.00349683	0.0127043	0.0040021	0.00383714
ADX15991	0.00224118	0.00170026	0.00225878	0.00154959	0.00135708	0.00169589
ADX15992	0.0106501	0.0103183	0.0107316	0.00324946	0.00407415	0.00378276
ADX15993	0.0146012	0.0130893	0.0142781	0.0118649	0.00931111	0.008235
ADX15994	0.00415726	0.00398865	0.00393389	0.00572623	0.0029706	0.0028863
ADX15995	0.0410793	0.042089	0.0386938	0.0942407	0.0493331	0.0514947
ADX15996	0.0130272	0.0108307	0.0106959	0.0613358	0.00853603	0.00934423
ADX15997	0.00596608	0.00723301	0.00692229	0.0187744	0.00503016	0.00497354
ADX15998	0.0128254	0.0134766	0.0139065	0.0112587	0.00708687	0.00829174
ADX15999	0.0537232	0.0526899	0.0536686	0.0306935	0.00637571	0.00522595
ADX16000	0.0010062	0.00125482	0.00123522	0.00137289	0.000657628	0.000592853
ADX16001	0.00104788	0.0011616	0.000778186	0.00381612	0.000893015	0.000999143
ADX16002	0.000764079	0.000914757	0.00142667	0.00789625	0.000699137	0.000528616
ADX16003	0.0045956	0.00471084	0.00450043	0.00458047	0.00358798	0.0032654
ADX16004	0.00248967	0.00298693	0.00244737	0.00368994	0.00139941	0.00115724
ADX16005	0.0306792	0.0307072	0.0303664	0.0833286	0.0321982	0.032744
ADX16006	0.00378134	0.00511467	0.00435106	0.0302796	0.00619385	0.00612413
ADX16007	0.0205792	0.0213726	0.0231925	0.109183	0.026965	0.0226218
ADX16008	0.00198548	0.00246267	0.00240812	0.00262161	0.00100728	0.00111375
ADX16009	0.00275915	0.00295413	0.00281009	0.00799042	0.00309693	0.00313728
ADX16010	0.00648386	0.00843748	0.00466556	0.0120872	0.00409679	0.00337557
ADX16011	0.00460324	0.00297162	0.00344723	0.0158522	0.002842	0.00302617
ADX16012	0.00857467	0.00912498	0.00873298	0.0223891	0.00715358	0.00912654
ADX16013	0.00548779	0.00355874	0.00279455	0.0380095	0.00243683	0.00525689
ADX16014	0.00362042	0.00475259	0.00485165	0.0306376	0.00523058	0.00471538
ADX16015	3.33e-05	2.66e-05	5.09e-05	0.000302029	5.91e-05	4.78e-05
ADX16016	0.000199928	0.000186164	0.00028846	0.000571479	0.000193696	0.000207475
ADX16017	0.000961645	0.000383761	0.0004897	0.00285452	0.00108695	0.00153531
ADX16018	0.00232635	0.00410624	0.00318943	0.016821	0.00346743	0.00271415
ADX16019	0.00144415	0.00126069	0.00137889	0.014587	0.00204041	0.00288206
ADX16020	0.00169144	0.00196875	0.00143556	0.0113898	0.0027312	0.00292549
ADX16021	0.000541558	0.00135074	0.00137889	0.0060283	0.00131169	0.000648464
ADX16022	0.000461302	0.000434658	0.000163132	0.00363461	0.000434508	0.000327328
ADX16023	0.000135093	4.49e-05	0.000257976	0.00163373	0.000109069	8.99e-05
ADX16024	1.73e-05	6.92e-05	8.83e-05	0.000486041	8.4e-05	0.000110718
ADX16025	0.000102896	2.57e-05	3.27e-05	0.000657531	0.000103842	0.000123208
ADX16026	0.000133631	0.000186647	0.000306221	0.00299704	0.000388397	0.000149343
ADX16027	0.000240869	0.000285364	0.000344975	0.00111717	9.72e-05	0.000156226
ADX16028	0.000354344	0.000326324	0.000347006	0.00409043	0.000308089	0.000391655
ADX16029	0.000142515	0.000170619	0.000145146	0.00173916	0.000253134	0.000295791
ADX16030	0.00259994	0.00254991	0.00201962	0.0177316	0.00327315	0.0040102
ADX16031	8.34e-05	0.000166469	0.000106212	0.000321026	0.000246976	0.000110998
ADX16032	0.00451051	0.00731248	0.00897224	0.0743827	0.00591759	0.00787633
ADX16033	0.00839415	0.00648354	0.00482612	0.0484497	0.00655846	0.00691695
ADX16034	0.000565684	0.000875739	0.000769826	0.00289511	0.00067719	0.000731853
ADX16035	0.000372287	0.000412688	0.000368628	0.00371773	0.000150284	0.000181613
ADX16036	0.002153	0.00198443	0.00201744	0.00984049	0.0031059	0.00298369
ADX16037	0.00695694	0.00631729	0.00604591	0.0510087	0.00998904	0.00974359
ADX16038	0.00154528	0.00171297	0.00121783	0.00177978	0.00170306	0.0021734
ADX16039	0.000182521	0.000318666	0.000319499	0.000131685	0.000128939	0.000145701
ADX16040	0	0	0	1.29e-05	0	0
ADX16041	0.000493597	0.000530326	0.0003867	0.00197236	0.000459818	0.000363714
ADX16042	0	1.38e-05	0	0	3.34e-05	1.1e-05
ADX16043	0.000748335	0.00130653	0.000952688	0.0288465	0.00211461	0.00134409
ADX16044	0	4.6e-05	5.87e-05	0.000304368	0	3.68e-05
ADX16045	0.000127294	8.47e-05	5.4e-05	0.000174933	0.000102772	0.000101615
ADX16046	0.000975921	0.00114297	0.000756258	0.0123153	0.00208969	0.00287909
ADX16047	0.00241792	0.00182261	0.00280459	0.00841782	0.00225579	0.00261643
ADX16048	0.00267317	0.00372525	0.00394334	0.0128401	0.0052071	0.00487752
ADX16049	0.000614305	0.000957612	0.00117309	0.00221604	0.000836938	0.000704923
ADX16050	0.000306466	0.000290464	0.000136554	0.0017436	0.000457741	0.000440357
ADX16051	9.47e-05	4.72e-05	6.03e-05	0.00219914	0.000191121	0.00012598
ADX16052	0.00239603	0.00321381	0.0027453	0.0118099	0.0147448	0.016024
ADX16053	0.00106845	0.00115865	0.000827957	0.00708619	0.00251284	0.00244748
ADX16054	0.000361692	0.000350235	0.00040629	0.0108767	0.00270972	0.00256034
ADX16055	0.00130579	0.00169356	0.00132989	0.00512502	0.00118074	0.00139678
ADX16056	0.00469958	0.00429379	0.00409358	0.0150106	0.00579121	0.00639735
ADX16057	0.00379195	0.00382251	0.00417372	0.0537391	0.0147014	0.0146305
ADX16058	0.00341263	0.00355474	0.003794	0.00672075	0.00271726	0.00252158
ADX16059	0.0108894	0.0109561	0.010926	0.0117562	0.00827013	0.00773505
ADX16060	0.00163971	0.00166438	0.00170926	0.00438111	0.00144376	0.00157345
ADX16061	0.00382926	0.00349992	0.00333384	0.0280908	0.00191479	0.00212989
ADX16062	0.00161496	0.00133499	0.00123358	0.00121747	0.00119209	0.00136284
ADX16063	0.0477513	0.047358	0.0470621	0.0315297	0.0325452	0.035487
ADX16064	0.0497643	0.0494242	0.0505877	0.0244347	0.0177627	0.0164875
ADX16065	0.062863	0.0587064	0.0562868	0.154838	0.0573729	0.0587806
ADX16066	0.0547888	0.0533278	0.0511219	0.095145	0.0381924	0.0358424
ADX16067	0.0178475	0.0178058	0.0185479	0.0758329	0.0139682	0.0157009
ADX16068	0.00156694	0.00198017	0.00186185	0.00516808	0.00109641	0.00133424
ADX16069	0.0180892	0.0194352	0.0204184	0.0301931	0.0174426	0.0173047
ADX16070	0.0572413	0.060731	0.0528382	0.0717242	0.0480293	0.0487311
ADX16071	0.000361744	0.000401	0.000255849	0.00102739	0.000389409	0.000224598
ADX16072	0.00389895	0.00414746	0.00325432	0.0460514	0.0262668	0.0268987
ADX16073	5.74e-05	5.73e-05	6.26e-05	0.00089237	0.00011253	0.000143988
ADX16074	0.000875711	0.000393151	0.000613166	0.0088092	0.00060096	0.000699054
ADX16075	0.00041481	0.000229913	0.000322719	0.00296427	0.000576773	0.000404715
ADX16076	0.00439861	0.00595562	0.00679972	0.079532	0.00824397	0.00639554
ADX16077	0.00162982	0.0014309	0.00132793	0.00675516	0.00238607	0.00202962
ADX16078	0.000861455	0.00105043	0.000852988	0.00812912	0.00208651	0.00213943
ADX16079	0.00028622	0.000171331	0.00036438	0.00611245	0.000623921	0.000731138
ADX16080	0.00202253	0.0015638	0.00135179	0.0136749	0.00240853	0.00193743
ADX16081	0.00152935	0.00128487	0.00129799	0.0079865	0.0012564	0.000920983
ADX16082	0.000799928	0.000865268	0.000728939	0.00830375	0.000781792	0.000860374
ADX16083	3.45e-05	0.00020669	0.00021979	0.00153742	0.000167263	0.000220507
ADX16084	5.37e-05	8.03e-05	0.000102473	0.000442465	4.33e-05	2.14e-05
ADX16085	0.00325374	0.00285772	0.00311555	0.0130245	0.0056131	0.00568312
ADX16086	0.00140446	0.00147902	0.00141549	0.0180301	0.00302373	0.00289627
ADX16087	0.00744069	0.00732302	0.0072111	0.0371705	0.00863211	0.00826739
ADX16088	0.0011582	0.00121186	0.00136659	0.000722066	0.00111754	0.00131918
ADX16089	0.000314529	0.00044828	0.00040042	0.00155607	0.000326491	0.000322816
ADX16090	0.00029777	0.00019805	0.000294843	0.000995743	0.000200339	9.24e-05
ADX16091	0.000872435	0.000768	0.00065334	0.0247123	0.00145017	0.00172061
ADX16092	0.000155608	0.000485142	0.000321915	0.00144345	0.000424007	0.000357125
ADX16093	0.00353705	0.0017644	0.00163743	0.0253202	0.00337488	0.0024385
ADX16094	0.000885321	0.000757077	0.000943069	0.007285	0.000846055	0.000764418
ADX16095	4.94e-05	0	2.1e-05	0.000434395	7.98e-05	9.2e-05
ADX16096	0.00714556	0.00570311	0.00800523	0.0438354	0.00715358	0.00661674
ADX16097	0.00713412	0.00465374	0.00663706	0.0780553	0.0073105	0.0100757
ADX16098	0.000487219	0.000370349	0.000472585	0.00139651	0.000955303	0.00111124
ADX16099	0.00216623	0.00254256	0.00340667	0.0264772	0.00416655	0.00411966
ADX16100	0.0103281	0.0109029	0.00985644	0.010737	0.00377778	0.00428817
ADX16101	0.0238009	0.0251556	0.0229764	0.0182154	0.00899746	0.00952601
ADX16102	0.000311133	0.000199547	0.000169755	0.00126439	0.00213516	0.00216435
ADX16103	0.000495342	0.000494187	0.000544617	0.00904123	0.003981	0.00381038
ADX16104	0.000639768	0.00108507	0.000977369	0.0211535	0.00578504	0.00493684
ADX16105	0	0	0	0	0	0
ADX16106	0.000310239	0.000412688	0.000460785	0.000255807	0.000500948	0.000825516
ADX16107	0.00363801	0.0027086	0.00362914	0.0107229	0.00140283	0.00125701
ADX16108	0.00110274	0.00114665	0.00120614	0.0073381	0.00126648	0.000979467
ADX16109	0.00050506	0.000607858	0.000724629	0.0168628	0.00185112	0.00172789
ADX16110	0.000459719	0.000836357	0.000826247	0.0106583	0.0179902	0.0178093
ADX16111	0.00406977	0.00325588	0.00361702	0.00952898	0.00595156	0.00505706
ADX16112	0.000377106	0.000188113	0.000445793	0.00159913	0.000978619	0.000709576
ADX16113	0.000183042	0.000313055	0.000299607	0.00269513	0.0005489	0.000594906
ADX16114	0.000528349	0.000395338	0.000369946	0.0053367	0.00117306	0.00103333
ADX16115	0.00126512	0.00134631	0.00161059	0.00577209	0.0020428	0.00218812
ADX16116	0.0116642	0.0115194	0.0135494	0.00741564	0.00608786	0.00595663
ADX16117	0.0066136	0.00611772	0.00531335	0.0617591	0.0129341	0.0131473
ADX16118	0.00284802	0.00329966	0.00327487	0.0290889	0.00593385	0.00718715
ADX16119	0.00569555	0.00691521	0.00636162	0.0282661	0.00676737	0.00707724
ADX16120	0.00149815	0.00187512	0.0014738	0.00440216	0.00183631	0.00160907
ADX16121	0.000643303	0.00072608	0.000719705	0.000932279	0.000692501	0.000726204
ADX16122	0.000335713	0.000217704	0.000299172	0.00206225	0.000528529	0.000589577
ADX16123	0.00124123	0.00107681	0.00115651	0.0218411	0.00267231	0.00257043
ADX16124	0.0160553	0.0164604	0.0150192	0.0299875	0.0117449	0.0110463
ADX16125	0.00127294	0.00232828	0.00067523	0.0129451	0.00539552	0.00491139
ADX16126	0.000755502	0.000835668	0.000669087	0.00452314	0.00068952	0.000668648
ADX16127	0.00196543	0.00212862	0.00179298	0.00754831	0.0107003	0.0109742
ADX16128	0.000518804	0.000476186	0.000625252	0.00178526	0.00149114	0.00165658
ADX16129	0.00305632	0.00426887	0.00415032	0.031585	0.0776453	0.0761207
ADX16130	0.0011441	0.0010829	0.00110174	0.00535785	0.00169345	0.00201395
ADX16131	0.0024043	0.00221574	0.00241238	0.0094251	0.00282945	0.0024235
ADX16132	0.000314186	0.00047018	0.00179993	0.0160618	0.0012683	0.00112863
ADX16133	0.00376673	0.00366629	0.00280703	0.00507541	0.00215102	0.00168678
ADX16134	0.00282862	0.0033128	0.00365324	0.00400552	0.00186999	0.00191439
ADX16135	0.00109339	0.000925268	0.00100669	0.00827498	0.00267192	0.00294578
ADX16136	0.00397257	0.0035085	0.00381377	0.0137467	0.00373307	0.00491273
ADX16137	0.0128714	0.0138866	0.0125755	0.0372691	0.0157085	0.0153525
ADX16138	0.00458441	0.00519282	0.00475611	0.0046781	0.00260724	0.0023656
ADX16139	0.00218089	0.0018286	0.00221524	0.00883818	0.00288464	0.00290773
ADX16140	0.00223572	0.00209	0.00215149	0.00598036	0.00137864	0.0014896
ADX16141	0.0046094	0.00403266	0.00465839	0.00321595	0.00202675	0.00199262
ADX16142	0.00159309	0.00182887	0.00176419	0.00271713	0.000616667	0.000783934
ADX16143	0.000274671	0.00029511	0.000215186	0.00200347	0.000358224	0.00045539
ADX16144	0.00199063	0.00199998	0.00216837	0.00343879	0.00150529	0.0015387
ADX16145	0.0075577	0.00643028	0.00699749	0.00725682	0.00533575	0.00451829
ADX16146	0.00122728	0.00122442	0.00126805	0.00256655	0.000545688	0.000383362
ADX16147	0.012921	0.0137492	0.013035	0.072005	0.00706809	0.00684041
ADX16148	0.00472155	0.00489821	0.0054601	0.0103766	0.00300706	0.00267289
ADX16149	0.00821832	0.00779919	0.00986713	0.0343227	0.00523257	0.00485366
ADX16150	0.137929	0.138753	0.128923	0.104574	0.0748051	0.0832849
ADX16151	0.00406317	0.00420383	0.00452614	0.123061	0.00551295	0.00521063
ADX16152	0.0127574	0.0124685	0.0141834	0.0374117	0.00319246	0.00311045
ADX16153	0.0194746	0.0201074	0.0193625	0.114604	0.0101116	0.00941443
ADX16154	0.0777523	0.0764903	0.0737707	0.0185633	0.0489074	0.0464424
ADX16155	0.313801	0.309116	0.298765	0.214689	0.175539	0.175093
ADX16156	0.0518339	0.0574232	0.0552634	0.0193017	0.0218069	0.0214588
ADX16157	0.000777272	0.000590826	0.000730366	0.00108342	0.000508006	0.000428422
ADX16158	0.0009412	0.000939005	0.000841993	0.00369155	0.00071881	0.000954394
ADX16159	0.0171263	0.0187399	0.0191657	0.0313178	0.0183989	0.0192944
ADX16160	0.00782462	0.00744538	0.00765815	0.0103676	0.0176372	0.0177998
ADX16161	0.0778611	0.0789604	0.0807119	0.0181517	0.020334	0.0216123
ADX16162	0.00258587	0.00182738	0.00150884	0.00755145	0.00461038	0.0055906
ADX16163	0.000182386	0.000212287	0.00027089	0.0017545	0.000269959	0.000242655
ADX16164	0.0225357	0.0203143	0.0210329	0.0687107	0.0167318	0.0160807
ADX16165	0.0109952	0.01015	0.0105654	0.00866664	0.00790775	0.00709572
ADX16166	0.0187434	0.0173656	0.0184951	0.0285363	0.00794142	0.00736355
ADX16167	0.0179774	0.0188063	0.018164	0.00539782	0.012373	0.0122337
ADX16168	0.00228731	0.00208581	0.00206921	0.00143746	0.00106885	0.000978341
ADX16169	0.00198601	0.00235716	0.00211422	0.00285162	0.00160342	0.00148971
ADX16170	0.0251349	0.0238225	0.0189992	0.0382116	0.02841	0.0248298
ADX16171	0.0199221	0.0199054	0.0209896	0.0157618	0.011816	0.0129705
ADX16172	0.00605458	0.00681731	0.00615017	0.0132473	0.00461878	0.00416085
ADX16173	0.0185075	0.0217713	0.0203965	0.0608134	0.0249779	0.0233737
ADX16174	0.00870599	0.00829654	0.00838207	0.00928832	0.00282161	0.00254076
ADX16175	0.000661988	0.000674802	0.000476344	0.00170872	0.000302087	0.000252735
ADX16176	0.000135911	0.000158193	5.77e-05	0.000205453	3.66e-05	7.23e-05
ADX16177	0.000888803	0.000647995	0.00104448	0.00267776	0.000441589	0.000682216
ADX16178	0.00116887	0.00127216	0.00157825	0.00808999	0.000943696	0.00121582
ADX16179	0.00102509	0.000906924	0.00110804	0.00162668	0.000858846	0.000988136
ADX16180	0.000164341	0.000109305	0.000116233	0.00121957	0.000206395	0.000174919
ADX16181	0.000929783	0.00111314	0.00110477	0.000919981	0.000600534	0.000296887
ADX16182	0.00109191	0.00102267	0.00124824	0.00102895	0.0012054	0.00119184
ADX16183	0.00309903	0.00345555	0.00286228	0.0145302	0.00310709	0.00324998
ADX16184	0.0775244	0.0725623	0.0663228	0.0326354	0.0334571	0.0322704
ADX16185	0.0104086	0.011215	0.0112443	0.0251586	0.00806729	0.00697943
ADX16186	0.00432934	0.00544343	0.00483208	0.0458689	0.00617667	0.00525499
ADX16187	0.054342	0.0619144	0.0601757	0.108174	0.0316719	0.0372192
ADX16188	0.467771	0.446284	0.452276	0.106277	0.250096	0.252037
ADX16189	0.0166923	0.0168199	0.0170005	0.00725538	0.0103963	0.0104125
ADX16190	0.0545597	0.0548515	0.0556545	0.0101371	0.0209611	0.0210605
ADX16191	0.719426	0.726045	0.708807	0.142954	0.297359	0.290749
ADX16192	0.207855	0.210982	0.209416	0.231513	0.123149	0.126739
ADX16193	0.00029852	0.000446735	0.000356286	0.000353832	0.000482024	0.00040213
ADX16194	0.0168574	0.0161192	0.0150504	0.0116614	0.0060803	0.00559243
ADX16195	0.0163062	0.0167582	0.0170699	0.0132833	0.0102702	0.0108604
ADX16196	0.00855185	0.00912031	0.0082056	0.112267	0.023077	0.0228509
ADX16197	0.251826	0.245537	0.249831	0.0489287	0.0983659	0.0948983
ADX16198	0.0201778	0.0192243	0.0179412	0.0418464	0.0203505	0.0208299
ADX16199	0.0337534	0.0334652	0.0341627	0.0136332	0.0265283	0.0266003
ADX16200	0.105506	0.108183	0.110362	0.0264626	0.0329708	0.0325632
ADX16201	0.13521	0.14304	0.136516	0.0778309	0.245789	0.258568
ADX16202	0.0201528	0.019964	0.0196673	0.00853115	0.0112333	0.0109708
ADX16203	0.000387313	0.00043793	0.000328719	0.000723878	0.000396086	0.00041224
ADX16204	0.00174684	0.00133692	0.00164505	0.00290044	0.00137169	0.00158547
ADX16205	0.00411955	0.00423954	0.00479566	0.007987	0.00299635	0.00308113
ADX16206	0.00162521	0.0013174	0.00157763	0.00914593	0.0021322	0.00212442
ADX16207	0.00174594	0.00185609	0.00174902	0.00269042	0.00217217	0.00207917
ADX16208	0.00151126	0.00135882	0.00133014	0.0119687	0.000994175	0.00126597
ADX16209	0.00233163	0.00311002	0.00258117	0.0153595	0.00323292	0.00368208
ADX16210	0.00718528	0.00727292	0.00821492	0.0089732	0.00695568	0.00606992
ADX16211	0.00402096	0.00419188	0.00440004	0.0112316	0.00373878	0.00362457
ADX16212	0.000970336	0.00116975	0.00159561	0.000233359	9.79e-05	3.23e-05
ADX16213	0.00251959	0.00216752	0.00226648	0.00390625	0.000864845	0.000867155
ADX16214	0.00202932	0.00202459	0.00244477	0.00367221	0.00167137	0.00165256
ADX16215	0.00115784	0.0012239	0.00135118	0.00467118	0.00750057	0.00736114
ADX16216	0.00275123	0.00237152	0.00246578	0.0192008	0.00469123	0.00491954
ADX16217	0.0181397	0.0213425	0.0211025	0.0487394	0.0144937	0.0150796
ADX16218	0.00110605	0.00110347	0.00132275	0.00444941	0.00186713	0.00147154
ADX16219	0.000434117	0.000536224	0.000460554	0.00172157	0.000792769	0.000965368
ADX16220	0.00374559	0.00386571	0.00342559	0.0496099	0.00841166	0.0080936
ADX16221	0.0659547	0.0711861	0.0672153	0.35328	0.0555642	0.052111
ADX16222	0.00619469	0.00611064	0.00580817	0.00394591	0.00299629	0.00334124
ADX16223	0.0213933	0.0223179	0.0208099	0.0374275	0.0201375	0.0219643
ADX16224	0.125423	0.124094	0.124796	0.0625213	0.0799815	0.0766456
ADX16225	0.0111933	0.0108825	0.0118884	0.0132559	0.0087426	0.00849232
ADX16226	0.0143776	0.0131233	0.0122144	0.073538	0.0180966	0.0181371
ADX16227	0.0118035	0.0110814	0.0110073	0.0131636	0.0062093	0.00628159
ADX16228	0.0317263	0.0359296	0.0335674	0.0979226	0.0425754	0.0319999
ADX16229	0.000201071	0.000209324	0.000200332	0.000865006	0.000141162	0.000216338
ADX16230	0.00400992	0.00369864	0.00375646	0.0275115	0.00354286	0.00452972
ADX16231	0.0156118	0.0186905	0.0169841	0.0649486	0.00504172	0.00475839
ADX16232	0.0034537	0.00314936	0.00298256	0.00581338	0.00186483	0.00204579
ADX16233	0.0801158	0.0772391	0.0808384	0.140059	0.0523321	0.0520945
ADX16234	0.011634	0.0099045	0.010993	0.00673626	0.00726375	0.00540713
ADX16235	0.0251096	0.0259668	0.0277822	0.0207285	0.008152	0.00858026
ADX16236	0.0901853	0.0901441	0.0884599	0.0141737	0.0107801	0.0101659
ADX16237	0.0178023	0.0187007	0.0182761	0.0375352	0.00852758	0.00821388
ADX16238	0.00243451	0.00261858	0.00244556	0.0014428	0.00299434	0.0035224
ADX16239	0.006431	0.00553104	0.00609803	0.00672891	0.0051205	0.00495665
ADX16240	0.000836175	0.000811052	0.000842742	0.00072777	0.000834489	0.000750931
ADX16241	0.00435618	0.00395407	0.0044572	0.00756486	0.00141799	0.00178021
ADX16242	0.0320256	0.0300071	0.030307	0.176613	0.0592823	0.0587609
ADX16243	0.00137621	0.00150073	0.00150756	0.00365497	0.00100774	0.00125188
ADX16244	0.00993066	0.0104088	0.00898684	0.0356537	0.0197252	0.0206493
ADX16245	0.00889716	0.00956199	0.00874832	0.00778346	0.0112712	0.0109133
ADX16246	0.00655995	0.0077058	0.00747579	0.0204582	0.00452742	0.00456092
ADX16247	0.0126476	0.0121904	0.0117349	0.0897919	0.00934581	0.0124919
ADX16248	0.00416895	0.00414598	0.00459749	0.00484972	0.00381604	0.00395326
ADX16249	0.0098147	0.00994974	0.0101773	0.0131833	0.0152728	0.0145323
ADX16250	0.00823168	0.0111455	0.00673687	0.0162413	0.0106809	0.0114994
ADX16251	0.0048602	0.00419361	0.00445939	0.0105422	0.00576214	0.00671092
ADX16252	0.00257707	0.00260832	0.00275778	0.00695987	0.00208062	0.00199757
ADX16253	0.0131216	0.0125259	0.0126187	0.0347933	0.00975546	0.00859067
ADX16254	0.0375818	0.0382627	0.038808	0.0270408	0.0115504	0.012826
ADX16255	0.000751543	0.000684591	0.000807017	0.000937608	0.000754498	0.000704271
ADX16256	0.002001	0.00208238	0.00245958	0.00859095	0.00233972	0.0025337
ADX16257	0.000535753	0.000660269	0.000641934	0.00210483	0.00104319	0.00113208
ADX16258	0.000795746	0.00069618	0.000740303	0.00312419	0.00194712	0.00194964
ADX16259	0.00404981	0.00373295	0.00339045	0.0167326	0.00334073	0.0031977
ADX16260	0.00542207	0.00749942	0.00627519	0.0156476	0.00606887	0.00482012
ADX16261	0.00175822	0.00207305	0.00284882	0.00517294	0.00180665	0.00162683
ADX16262	0.00276126	0.0032746	0.00285204	0.0209637	0.00298645	0.0038678
ADX16263	0.00705893	0.00726603	0.00727484	0.0185083	0.00723692	0.00772194
ADX16264	0.000448302	0.000223628	0.000271773	0.00206826	0.000473969	0.000323784
ADX16265	0.00231438	0.00268341	0.00246859	0.0106763	0.0060601	0.00639135
ADX16266	0.00472811	0.00526006	0.00567283	0.0167161	0.00738739	0.00716848
ADX16267	0.000195166	0.000259615	0.000276069	0.000697337	0.000236353	0.00042411
ADX16268	0.00054324	0.000255046	0.000447497	0.00682431	0.00113517	0.00102036
ADX16269	0.00119879	0.00159466	0.00101743	0.0113673	0.00233897	0.00239239
ADX16270	0.000342274	0.000341475	0.000190637	0.00888996	0.000708114	0.00066599
ADX16271	0	0	0	1.7e-05	0	0
ADX16272	3.05e-05	9.13e-05	1.94e-05	0.00103145	0.000160113	0.000243555
ADX16273	0.000135066	6.13e-05	0.000109423	0.00141742	0.000366794	0.000480287
ADX16274	0.000286759	0.000185117	0.000429491	0.00324071	0.000367704	0.000323169
ADX16275	0.000112114	0.000124281	0.000206166	0.00112987	0.000160918	0.000139218
ADX16276	0.00227703	0.00197168	0.00213311	0.0346102	0.00395425	0.00404692
ADX16277	0.00228658	0.00228124	0.00323443	0.017597	0.00882019	0.00750404
ADX16278	0.000388776	0.000568875	0.000560934	0.006625	0.000648688	0.000889665
ADX16279	0.000398147	0.000297914	0.000253436	0.00798158	0.00128579	0.000814436
ADX16280	4.11e-05	1.64e-05	5.24e-05	0.000203541	6.64e-05	1.97e-05
ADX16281	0.000197877	0.000394831	0.000188935	0.000448687	0.000319515	0.000315919
ADX16282	0.00182117	0.000999307	0.00150702	0.0236133	0.000955717	0.00112668
ADX16283	0.00684477	0.00673925	0.00751398	0.0320681	0.00735616	0.0069509
ADX16284	0.00495482	0.00454901	0.00417944	0.00854693	0.00481019	0.00380969
ADX16285	0.00734406	0.00614091	0.00602003	0.0174478	0.00379644	0.00388024
ADX16286	0.0439615	0.0445348	0.0431494	0.0197806	0.0219707	0.0232338
ADX16287	0.0233053	0.022291	0.0209591	0.0232491	0.0105946	0.0116488
ADX16288	0.00214506	0.00207318	0.00226147	0.00273597	0.00129887	0.00120399
ADX16289	0.000449983	0.000389075	0.000343718	0.00200357	0.000314857	0.000407102
ADX16290	0.000264273	0.000144586	0.000184499	0.000421753	6.88e-05	6.12e-05
ADX16291	0.0020888	0.00246447	0.00219673	0.00188706	0.00247829	0.00253739
ADX16292	0.0117525	0.0120219	0.0123419	0.0319336	0.00796708	0.00787741
ADX16293	0.000342316	0.000281249	0.000384524	0.00780354	0.00172325	0.00168778
ADX16294	0.000124912	6.23e-05	0.000198778	0.000772468	0.000327757	0.00029914
ADX16295	5.64e-05	0	7.18e-05	0.000775528	9.11e-05	0.000210227
ADX16296	0.000644489	0.000665158	0.000594144	0.0042513	0.000699758	0.000887028
ADX16297	0.00123817	0.0010223	0.0011958	0.00770977	0.00120647	0.00112472
ADX16298	0.00100632	0.000627482	0.000640561	0.00732261	0.00150305	0.0015263
ADX16299	0.000150213	0.000126807	0.000220653	0.0026296	0.000345169	0.000368956
ADX16300	0.000556912	0.000529155	0.000573946	0.00384854	0.00102772	0.00101615
ADX16301	0.000164071	0.000303993	0.000179036	0.00100497	0.000170311	0.000187104
ADX16302	0.000346562	0.000378683	0.000420191	0.00586483	0.000652866	0.000685039
ADX16303	0.00469919	0.00541571	0.00330065	0.00167013	0.00137366	0.0010995
ADX16304	0.0252499	0.0260523	0.0240908	0.00243908	0.000662763	0.000836076
ADX16305	0.0131096	0.0122041	0.0116461	0.0036655	0.000695843	0.000844925
ADX16306	0.00755939	0.00774644	0.00679083	0.00087185	0.000203862	0.000277156
ADX16307	0.000697297	0.000767022	0.000705618	0.00315488	0.000952715	0.00129881
ADX16308	0.00637666	0.00462675	0.00590398	0.0074088	0.0142747	0.0136512
ADX16309	0.000917544	0.000810787	0.00113473	0.00188059	0.00124875	0.000920792
ADX16310	0.000591262	0.000573497	0.000522724	0.00728578	0.00074256	0.000786645
ADX16311	0.000137325	0.000137005	0.000174826	0.00203817	0.000190064	7.83e-05
ADX16312	0.000247346	0.000234431	0.000283402	0.000448687	8.99e-05	0.000138214
ADX16313	0.00514889	0.0053978	0.0055769	0.00362553	0.00533151	0.00574124
ADX16314	0.0150846	0.0170544	0.0163541	0.037314	0.00891324	0.00865047
ADX16315	0.00467814	0.00469022	0.0053102	0.0304598	0.00506072	0.00498536
ADX16316	0.00142724	0.00142391	0.00169421	0.0159507	0.00417316	0.00426475
ADX16317	0.00428565	0.00508238	0.00499272	0.0481053	0.0121755	0.011877
ADX16318	0.00037054	0.000625605	0.000435439	0.00298477	0.000506267	0.000568828
ADX16319	0.000361744	0.0005614	0.000409358	0.0023862	0.000259606	0.000288769
ADX16320	0.000133728	7.41e-05	5.67e-05	0.000318543	4.8e-05	8.3e-05
ADX16321	7.49e-05	9.97e-05	0.000190769	0.00137972	0.000181472	7.97e-05
ADX16322	4.71e-05	0	0.000119904	0.00326169	0	0.000225553
ADX16323	0.00022656	0.000263704	9.61e-05	0.00217945	0.000243887	0.000241142
ADX16324	0.0183466	0.0165605	0.0184134	0.0180891	0.0167715	0.0165053
ADX16325	0.000594088	0.000900907	0.00096809	0.000666201	0.000786612	0.000948485
ADX16326	0.00369465	0.00328057	0.00301029	0.0145923	0.00432521	0.00430602
ADX16327	0.00166024	0.001926	0.00152377	0.00528476	0.00177681	0.00212667
ADX16328	0.000981337	0.00115182	0.000992105	0.00295105	0.00104862	0.00147458
ADX16329	0.000165453	0.000141486	0.000200604	0.000727595	0.000413461	0.000345914
ADX16330	0.000592648	0.000611655	0.000520336	0.00261184	0.000659971	0.00068517
ADX16331	0.00572086	0.00594533	0.00455194	0.0145772	0.00237354	0.00187112
ADX16332	0.00311729	0.00305945	0.00322647	0.000647814	2.05e-05	0.000141619
ADX16333	0.000456049	0.000739351	0.000762019	4.7e-05	9.2e-05	0
ADX16334	0.0183294	0.0165702	0.0189542	0.0275534	0.00331227	0.00316934
ADX16335	0.00883939	0.00802646	0.00742889	0.0381508	0.00535241	0.00548511
ADX16336	0.0431318	0.0424687	0.0427078	0.0678742	0.00864879	0.00697617
ADX16337	0.0143398	0.0136511	0.0147717	0.00911608	0.00203266	0.00131073
ADX16338	0.00335097	0.00289574	0.00244227	0.000749821	9.05e-05	0.000109386
ADX16339	0.00595597	0.0052104	0.0049512	0.00342669	0.000556218	0.000585439
ADX16340	0.00983481	0.00782681	0.00767151	0.00956238	0.00215717	0.00181522
ADX16341	0.00575467	0.00586606	0.00557424	0.00618913	0.000707012	0.000549257
ADX16342	0.0185098	0.0169755	0.0163926	0.0137455	0.00269178	0.00256971
ADX16343	0.00120487	0.000865484	0.00125779	0.00131139	0.000214008	0.000173126
ADX16344	0.000885294	0.000883229	0.000870002	0.000729968	0.000200631	0.00022317
ADX16345	0.0025288	0.00165294	0.00277531	0.00100661	0.000633614	0.000487264
ADX16346	0.00918715	0.00938569	0.0101521	0.243408	0.110251	0.113586
ADX16347	0.000542941	0.000489254	0.000691206	0.00166075	0.00336537	0.0031038
ADX16348	0.000679084	0.000927881	0.000883321	0.00417519	0.00303929	0.00324077
ADX16349	0.000990178	0.00108666	0.000987449	0.00247656	0.00101261	0.00125151
ADX16350	0.000520089	0.000366265	0.000415444	0.00266552	0.000740996	0.000765218
ADX16351	0.000633438	0.000511587	0.000604812	0.00402917	0.000870617	0.00099927
ADX16352	0.00175604	0.00118109	0.00135642	0.00313991	0.00210273	0.00223657
ADX16353	0.00223055	0.0023995	0.00190134	0.0780777	0.00444731	0.00413404
ADX16354	0.0359775	0.037312	0.0366294	0.0155975	0.0206809	0.02166
ADX16355	0.0151228	0.0175745	0.0159732	0.0152557	0.00851982	0.00904301
ADX16356	0.00039407	0.000262101	0.00022297	0.00126362	0.000106052	0.000104858
ADX16357	0.000962502	0.0013718	0.00204223	0.0152301	0.00114712	0.00124397
ADX16358	0.000472723	0.000282972	0.000361088	0.00109139	0.000279881	0.000402518
ADX16359	0.00391452	0.00418435	0.00427156	0.0400236	0.00641114	0.00656218
ADX16360	0.00704864	0.00731491	0.00707957	0.012208	0.0157283	0.0163429
ADX16361	0.00175014	0.00108376	0.00107562	0.0108977	0.00151043	0.000722629
ADX16362	0.00190855	0.00173853	0.00200718	0.0144369	0.00455566	0.00377574
ADX16363	0.00184072	0.00178133	0.00185127	0.00362744	0.00318029	0.00320327
ADX16364	0.00830641	0.00880318	0.00753768	0.0191015	0.0108599	0.0107836
ADX16365	0.000602318	0.000573599	0.000604144	0.00577909	0.000419974	0.000342397
ADX16366	0.000271225	0.000101472	0.000194226	0.00132785	0.000355835	0.000500681
ADX16367	9.44e-05	9.42e-05	0.000240357	0.000233512	0.000304858	0.00045214
ADX16368	1.59e-05	1.59e-05	2.7e-05	0.000122327	2.99e-05	1.69e-05
ADX16369	0.000380425	0.000307245	0.000322874	0.00135928	0.000307139	0.000231377
ADX16370	2.59e-05	5.17e-05	6.6e-05	0.000235081	2.09e-05	2.07e-05
ADX16371	0.000103726	0.000144877	0.000158461	0.00201844	0.000184236	0.000198723
ADX16372	0.000490468	0.000550489	0.000702454	0.00350492	0.00123745	0.00140297
ADX16373	0.000545911	0.000577647	0.000442265	0.00688836	0.000934915	0.000924392
ADX16374	0.000990213	0.000966427	0.000602904	0.0344873	0.00177271	0.00151218
ADX16375	0.00882717	0.0080727	0.00833906	0.00746616	0.00429863	0.00447395
ADX16376	0.134983	0.139951	0.13335	0.23372	0.0697553	0.0707423
ADX16377	0.00475459	0.0045758	0.00415759	0.0453418	0.00471107	0.00442802
ADX16378	0.000926746	0.000707035	0.000763412	0.00370836	0.0014084	0.00167541
ADX16379	0.00398629	0.00447411	0.0046308	0.015284	0.00864934	0.00799511
ADX16380	0.0107344	0.0109435	0.0112637	0.00353881	0.00322824	0.00320751
ADX16381	0.0100284	0.00958818	0.00970823	0.0824309	0.0171208	0.015844
ADX16382	0.00419907	0.00432137	0.00380462	0.00619165	0.00135911	0.00141931
ADX16383	0.0120103	0.0112441	0.0110404	0.0285032	0.00720992	0.00769193
ADX16384	0.0314525	0.0320779	0.0318039	0.0116057	0.012037	0.0109962
ADX16385	0.00604879	0.00641704	0.00591862	0.00318761	0.00379382	0.00367131
ADX16386	0.00686734	0.00557666	0.00580907	0.0118893	0.00303929	0.00305972
ADX16387	0.0161365	0.0150036	0.0147897	0.0154527	0.00803941	0.00721517
ADX16388	0.0276707	0.0284385	0.0299163	0.00687914	0.00718477	0.00810288
ADX16389	0.00500773	0.0043761	0.00549107	0.00198921	0.00180018	0.00172156
ADX16390	0.000623983	0.000695766	0.000607466	0.00109963	0.000760605	0.000810645
ADX16391	0.00231516	0.00241975	0.00252632	0.0266649	0.00430204	0.00346157
ADX16392	0.000821723	0.00087386	0.000827697	0.000744561	0.000605101	0.000576666
ADX16393	0.0149264	0.0157025	0.0143459	0.0065498	0.00522008	0.00563322
ADX16394	0.0122348	0.0127417	0.0141754	0.00882718	0.00994287	0.00918841
ADX16395	0.0662574	0.0659109	0.0680682	0.0917411	0.0371891	0.0347747
ADX16396	0.000163978	0	0.000208756	0.000946453	0.000132389	0.000130899
ADX16397	0.000465442	0.00039802	0.000402084	0.00283723	0.000295254	0.000398088
ADX16398	0.00331275	0.00310472	0.00319499	0.138604	0.0069701	0.00789334
ADX16399	0.0626904	0.0562707	0.0548237	0.277153	0.0736896	0.0752939
ADX16400	0.00265538	0.00221615	0.00211282	0.0773269	0.0137494	0.0134316
ADX16401	0.00108312	0.00108059	0.00121772	0.0090236	0.00161264	0.0018303
ADX16402	0.000160775	0.000137486	0.000175439	0.000719648	0.000315236	0.000385026
ADX16403	0.000448186	0.000521664	0.000665671	0.0022789	0.000723693	0.000864619
ADX16404	8.08e-05	5.37e-05	8.57e-05	0.000332934	3.26e-05	8.6e-05
ADX16405	0.000793251	0.000814013	0.000865603	0.014427	0.000969805	0.001176
ADX16406	0.00389336	0.00381492	0.00398294	0.0262554	0.00667959	0.0072149
ADX16407	0.0023142	0.00190811	0.00260528	0.00447869	0.00237795	0.00236645
ADX16408	0.000978782	0.00082817	0.00102524	0.00348361	0.00190055	0.00166157
ADX16409	0.00214871	0.00169081	0.00150259	0.00306931	0.0053998	0.00620873
ADX16410	0.00112926	0.000859791	0.000907977	0.00292815	0.003179	0.00316694
ADX16411	0.00161899	0.00143575	0.0019237	0.00925557	0.00676791	0.00697893
ADX16412	0.0130959	0.0142441	0.0134128	0.048064	0.121391	0.121125
ADX16413	0.0298748	0.0297515	0.0290719	0.0353548	0.017092	0.0182721
ADX16414	0.0188556	0.0188898	0.0179536	0.014083	0.0112382	0.0104863
ADX16415	0.0424763	0.0425795	0.0450415	0.0383673	0.0306105	0.0303469
ADX16416	0.0169965	0.0167016	0.0169411	0.0161948	0.0113979	0.0120697
ADX16417	0.0160228	0.0162871	0.0162472	0.0124638	0.00580558	0.00556786
ADX16418	0.00443047	0.00445217	0.00498638	0.00839162	0.00590978	0.00643271
ADX16419	0.00712056	0.00765041	0.00936387	0.108392	0.0108659	0.00930699
ADX16420	0.00215818	0.00237355	0.00235812	0.0172067	0.00680506	0.007461
ADX16421	0.00393454	0.00486822	0.00456701	0.00465959	0.00325444	0.00318702
ADX16422	0.00612564	0.00520666	0.00600785	0.0563075	0.00579724	0.00543653
ADX16423	0.00388634	0.00392048	0.00406559	0.0207264	0.00365333	0.00330975
ADX16424	0.00925403	0.0078256	0.00908828	0.0451647	0.0110291	0.0116437
ADX16425	0.0229163	0.0256478	0.0250419	0.0315818	0.0373701	0.0387115
ADX16426	0.0463032	0.0460939	0.0469254	0.0257598	0.0167514	0.0174275
ADX16427	0.000940549	0.000900821	0.0011495	0.00576993	0.00952236	0.00929505
ADX16428	0.000866831	0.000864809	0.000490463	0.00603561	0.00689474	0.00604829
ADX16429	0.000958101	0.00101561	0.000762335	0.00753792	0.00285239	0.00294776
ADX16430	0.00020928	0.000173993	0.000488455	0.00106413	0.000563213	0.000445499
ADX16431	0.000276818	0.000123551	0.000204027	0.0019221	0.000341117	0.000372169
ADX16432	0.00950901	0.00807089	0.00785968	0.0305434	0.00676049	0.00498498
ADX16433	0.0177424	0.0201795	0.0197881	0.00784761	0.0132539	0.0138819
ADX16434	0.0267551	0.027576	0.0265838	0.0206899	0.0150806	0.0156693
ADX16435	0.00253643	0.00278569	0.00288989	0.00242533	0.000335565	0.000450892
ADX16436	0.00661474	0.00664245	0.00676989	0.0124769	0.00411879	0.00438304
ADX16437	0.00934854	0.0100283	0.00911038	0.0205669	0.00878329	0.00794146
ADX16438	0.0330956	0.0324085	0.0326838	0.0264488	0.0244639	0.0241653
ADX16439	0.000516993	0.000272221	0.000457064	0.00133806	0.000544937	0.000584659
ADX16440	0.00103293	0.000990888	0.00126443	0.00491367	0.00256599	0.00260053
ADX16441	0.00062912	0.0006416	0.000516147	0.00580988	0.00160278	0.00190839
ADX16442	0.000208366	0.000220108	0.000140435	0.00805475	0.00168226	0.0017416
ADX16443	0.00149606	0.00099505	0.00103695	0.00423528	0.000939446	0.00116773
ADX16444	0.00301535	0.0023276	0.00271796	0.0250263	0.00312749	0.00325041
ADX16445	0.000369006	0.000453103	0.000469774	0.00292561	0.000435422	0.00045318
ADX16446	0.000610659	0.000487388	0.000505321	0.00568975	0.00105999	0.000438724
ADX16447	0.000139049	0.000360683	0.000247828	0.00304975	0.000336786	0.000155398
ADX16448	0.00012862	0.00051328	0	0.000424214	0.000415369	0.000102674
ADX16449	0.000955622	0.000842533	0.000905362	0.00245549	0.00224281	0.0018805
ADX16450	0.00119086	0.00129488	0.0010902	0.0119817	0.00182568	0.00227511
ADX16451	0.00152352	0.00140304	0.00140245	0.0107455	0.00126787	0.00114134
ADX16452	0.00913665	0.0095494	0.00869605	0.0302779	0.0110999	0.012781
ADX16453	0.0019536	0.00151382	0.00156952	0.00206438	0.00261855	0.00257394
ADX16454	0.00114168	0.00147063	0.00132467	0.003551	0.00172682	0.00174199
ADX16455	0.0017251	0.001582	0.00170814	0.00887939	0.00216653	0.00216997
ADX16456	0.000501059	0.000214239	0.000364507	0.00271497	0.000462324	0.00034284
ADX16457	0.0289221	0.0316292	0.0300934	0.458839	0.0498443	0.0535012
ADX16458	0.00115939	0.000289172	0.001476	0.00119497	0.000234011	0.000231377
ADX16459	0.000834292	0.000832346	0.00141616	0.00871358	0.000673572	0.00221997
ADX16460	0.00231878	0.00173503	0.001107	0.00788679	0.00163808	0.00161964
ADX16461	0.00135389	0.00135074	0.00172361	0.00580503	0.00240477	0.00367463
ADX16462	0.00310098	0.00478124	0.00251223	0.0318451	0.00455199	0.00540091
ADX16463	0.00166858	0.00221959	0.00106212	0.00206374	0.00179619	0.00133198
ADX16464	0.00840559	0.0115669	0.00774898	0.0210314	0.0086584	0.00717269
ADX16465	0.00194668	0.00249704	0.00283232	0.00802566	0.00112262	0.00199797
ADX16466	0.00434772	0.00780764	0.00848698	0.038239	0.0131046	0.00879233
ADX16467	0.00538979	0.00488838	0.00810919	0.0787825	0.00573605	0.00782275
ADX16468	0.0213414	0.0263611	0.0216707	0.0234627	0.0182557	0.0214981
ADX16469	0.0167883	0.0199909	0.0182703	0.0459937	0.0247035	0.0239932
ADX16470	0.22919	0.242718	0.241891	0.272194	0.500492	0.495533
ADX16471	0.00733382	0.00699591	0.0070693	0.0267377	0.020449	0.0217095
ADX16472	0.0065952	0.00657982	0.00627102	0.0120269	0.0269769	0.0275034
ADX16473	0.0032893	0.00343309	0.0033715	0.00923534	0.0126517	0.011688
ADX16474	0.0180365	0.0168613	0.0185594	0.0323437	0.0407295	0.0405146
ADX16475	0.0224056	0.0229693	0.0205662	0.0259619	0.0388786	0.03994
ADX16476	0.0499404	0.0500553	0.0504383	0.0326245	0.0481165	0.0489635
ADX16477	0.0306034	0.0304581	0.0317467	0.0190247	0.0329903	0.0321066
ADX16478	0.029815	0.029614	0.030466	0.0216874	0.0307834	0.029806
ADX16479	0.134881	0.139699	0.13857	0.260508	0.261883	0.266803
ADX16480	1.58e-05	7.87e-05	2.01e-05	0.000117114	2.55e-05	0
ADX16481	0.00614305	0.00665146	0.00630246	0.078973	0.00892734	0.00934609
ADX16482	0.0164722	0.016024	0.0162833	0.0252412	0.0488851	0.0498805
ADX16483	0.0112674	0.0116403	0.0118263	0.0291177	0.0387558	0.0419032
ADX16484	0.00600986	0.00581415	0.00637584	0.00908493	0.0226799	0.0229335
ADX16485	0.00458043	0.00365579	0.00454004	0.014055	0.0151884	0.0144167
ADX16486	0.0276831	0.0257919	0.0276907	0.012198	0.0111751	0.0111077
ADX16487	0.0105034	0.0119988	0.0109219	0.00471593	0.00392713	0.00347757
ADX16488	0.0111665	0.0106048	0.0108441	0.00339371	0.00392976	0.00362839
ADX16489	0.00828188	0.00779936	0.00921755	0.006984	0.00406252	0.00373632
ADX16490	0.0812531	0.0792268	0.0791697	0.0535032	0.0561203	0.0550314
ADX16491	0.0391301	0.0391011	0.0380768	0.0134822	0.035245	0.0349604
ADX16492	0.0172274	0.0173927	0.0171282	0.00448532	0.0102954	0.00982078
ADX16493	0.00746679	0.00581415	0.00440513	0.0195213	0.0066165	0.0061059
ADX16494	0.00158068	0.00197124	0.00154794	0.0132089	0.00350947	0.00344571
ADX16495	0.000314362	0.000413072	0.000263551	0.00202308	0.00120092	0.00124861
ADX16496	0.000701165	0.00108427	0.0011158	0.00722681	0.00551939	0.00590504
ADX16497	0.0035954	0.00393383	0.00407145	0.00728861	0.00494755	0.00462229
ADX16498	0.000478016	0.000476901	0.000468117	0.00139467	0.000851025	0.000704466
ADX16499	0.00994276	0.0094582	0.0129523	0.0981888	0.0209085	0.0249185
ADX16500	0.00799193	0.00896995	0.00890255	0.038138	0.0207281	0.0192986
ADX16501	0.000579288	0.000361211	0.000313428	0.00183895	0.000631385	0.000624278
ADX16502	4.17e-05	0.000110905	7.08e-05	0.00138636	0.000112186	0.000133108
ADX16503	2.76e-05	0	3.51e-05	0.00011373	6.68e-05	0
ADX16504	0	3.13e-05	0	0	0	0
ADX16505	2.21e-05	2.2e-05	0.000168663	0.000182066	7.13e-05	7.05e-05
ADX16506	0.00100933	0.00100698	0.000999414	0.0150266	0.00244468	0.00235002
ADX16507	0.00282768	0.00266436	0.00259989	0.0170981	0.00152196	0.00213185
ADX16508	0.00109077	0.000979404	0.000972045	0.00542634	0.00140903	0.00119
ADX16509	0.165309	0.162963	0.162981	0.0679755	0.0819332	0.0858167
ADX16510	0.0079814	0.00868415	0.00814291	0.00545745	0.00666836	0.0071483
ADX16511	0.00459357	0.00476617	0.00488306	0.0286534	0.0037272	0.00385026
ADX16512	0.00201615	0.00179399	0.00180363	0.00166241	0.00178906	0.00159493
ADX16513	0.00403566	0.00402625	0.0042871	0.0269293	0.00623593	0.00678445
ADX16514	0.000318833	0.000578344	0.000258299	0.00473207	0.000374417	0.000485892
ADX16515	0.00371537	0.00381063	0.00389005	0.0131129	0.00360703	0.00377894
ADX16516	0.00340928	0.00268656	0.00393141	0.00421667	0.00233365	0.00246515
ADX16517	0.00365336	0.0039398	0.00377727	0.0119798	0.00161971	0.00202292
ADX16518	0.0611368	0.0605446	0.0654017	0.112711	0.155233	0.145092
ADX16519	0.00694646	0.00599584	0.00606119	0.0127425	0.0179801	0.0187746
ADX16520	0.00720075	0.00734099	0.00651216	0.0103336	0.011516	0.0118575
ADX16521	0.00296738	0.00278444	0.00271587	0.0123396	0.00387203	0.00386686
ADX16522	0.00453169	0.00537215	0.00441174	0.00940743	0.00865174	0.00915018
ADX16523	0.0385662	0.0362067	0.0393321	0.0348967	0.013326	0.0143162
ADX16524	0.00705742	0.00763264	0.00822963	0.0701236	0.0495092	0.0464428
ADX16525	0.000675874	0.000465033	0.000741759	0.00372808	0.00345279	0.00355346
ADX16526	0.00197492	0.0021702	0.00163971	0.0176057	0.00813408	0.0076998
ADX16527	0.000477561	0.000461787	0.000420904	0.00437996	0.0043183	0.00415239
ADX16528	0.00129472	0.00137668	0.00149646	0.00965016	0.0124748	0.0125112
ADX16529	0.000864821	0.000581072	0.00071901	0.00213926	0.00277863	0.002691
ADX16530	0	0	6.03e-05	0	3.82e-05	0
ADX16531	0.00395121	0.00213525	0.00188632	0.00855215	0.00106335	0.00210275
ADX16532	0.00127482	0.00254369	0.00162294	0.0129141	0.0013233	0.00188992
ADX16533	0.000131245	0.000157127	0.000150376	0.000443693	0.000148346	0.000125723
ADX16534	0.000180678	9.01e-05	0.00013801	0.000402239	7.29e-05	5.77e-05
ADX16535	0.00127482	0.00109015	0.000695547	0.00675739	0.0008822	0.000726892
ADX16536	0.0353728	0.0360209	0.0329118	0.0501206	0.0201624	0.0204032
ADX16537	0.0299519	0.0281542	0.0261341	0.395779	0.0864462	0.0916133
ADX16538	0.00419316	0.00403504	0.00378597	0.0559815	0.00513809	0.00434434
ADX16539	0.0112993	0.00992981	0.0098552	0.0166117	0.0133151	0.0131269
ADX16540	0.00156489	0.00181306	0.00194939	0.00237254	0.00214647	0.00247155
ADX16541	0.00184339	0.00177567	0.00230632	0.00146755	0.00288674	0.0028035
ADX16542	0.00184011	0.00194822	0.00210356	0.00380863	0.00348668	0.00284788
ADX16543	0.00352563	0.00328291	0.0037902	0.00674004	0.00600915	0.00579558
ADX16544	0.145198	0.13659	0.14373	0.209514	0.182763	0.168841
ADX16545	0.00164634	0.00273749	0.00209591	0.0158373	0.00310142	0.00109518
ADX16546	0.00228658	0.00313671	0.0014555	0.0428927	0.00323065	0.00365061
ADX16547	0.00356706	0.00520124	0.00349319	0.0332583	0.0095258	0.00854244
ADX16548	0.00457316	0.00399218	0.00545811	0.0780082	0.0147687	0.013918
ADX16549	0.00274389	0.00301124	0.00384251	0.0325796	0.0170578	0.0162087
ADX16550	0.00200076	0.00228124	0.0014555	0.0282809	0.0133841	0.0141461
ADX16551	0.0526828	0.0500961	0.0523979	0.514486	0.194725	0.214437
ADX16552	0.0237233	0.0268046	0.0309293	0.0473705	0.0302297	0.0292049
ADX16553	0.016189	0.0219	0.0202605	0.0493219	0.0341157	0.0407409
ADX16554	0.00248145	0.00215922	0.00230399	0.00303065	0.00287708	0.0028447
ADX16555	0.00166008	0.00177042	0.00178546	0.0109269	0.0028192	0.00303879
ADX16556	0.00127249	0.00155407	0.00153618	0.00772449	0.00219641	0.00252196
ADX16557	0.00773053	0.00866991	0.00794113	0.00492351	0.00111913	0.00123421
ADX16558	0.00507074	0.00542399	0.00514661	0.014253	0.00308098	0.00326886
ADX16559	0.00472	0.00512338	0.0043745	0.00666288	0.00512162	0.00358698
ADX16560	0.00151833	0.00151479	0.00148689	0.00163715	0.000641206	0.000820456
ADX16561	0.00060119	0.000738201	0.000647614	0.00974261	0.00231487	0.0022519
ADX16562	0.00125611	0.00158736	0.00143921	0.00352145	0.00113244	0.000969288
ADX16563	0.00241822	0.00226685	0.00245873	0.0244358	0.00279097	0.00255226
ADX16564	0.10004	0.0978794	0.0936745	0.0173841	0.0224469	0.0222613
ADX16565	0.0100056	0.00955424	0.0101253	0.00639547	0.00284557	0.00262844
ADX16566	0.049621	0.05061	0.0502431	0.00888207	0.0139201	0.0136119
ADX16567	0.00919873	0.00982439	0.00874549	0.28601	0.182691	0.187813
ADX16568	0.0018691	0.00152224	0.00172393	0.00562997	0.00135505	0.00138547
ADX16569	0.0619763	0.0616201	0.0611083	0.0630416	0.0360986	0.0381903
ADX16570	0.00541846	0.00565154	0.00477294	0.00974789	0.00408741	0.00460939
ADX16571	0.00330455	0.00286252	0.00395503	0.00848427	0.00247624	0.00230621
ADX16572	0.00288611	0.00304034	0.00308088	0.00628191	0.00192488	0.00168857
ADX16573	0.00765326	0.0084598	0.00876637	0.00754338	0.00403456	0.00416191
ADX16574	0.00583348	0.00501156	0.00582771	0.0233484	0.00518394	0.00491539
ADX16575	0.000203979	0.00015828	0.000173121	0.00222385	0.000677034	0.000741782
ADX16576	0.00195136	0.00236102	0.00246661	0.0349983	0.00191064	0.00177866
ADX16577	0.00104463	0.00138091	0.000964174	0.00368226	0.00134942	0.00131339
ADX16578	0.0581466	0.054704	0.0518704	0.0540943	0.0143846	0.0153252
ADX16579	0.00151748	0.00151394	0.00159295	0.00720011	0.00126814	0.00150889
ADX16580	0.000686969	0.000655568	0.000532344	0.00243815	0.00055463	0.00073913
ADX16581	0.00264534	0.00258095	0.00269913	0.00561341	0.00103646	0.00100927
ADX16582	0.0037569	0.00353328	0.00405169	0.00509056	0.00198991	0.00236865
ADX16583	0.0033299	0.00338404	0.00329132	0.012978	0.00714686	0.00721501
ADX16584	0.00409018	0.00425666	0.00418611	0.00793541	0.00712247	0.00649172
ADX16585	0.00269229	0.00280352	0.0030419	0.00600767	0.00498579	0.00467446
ADX16586	0.00131217	0.00126547	0.00161481	0.00393108	0.00201284	0.00214731
ADX16587	0.00306559	0.00379473	0.00444478	0.00660018	0.00396463	0.00371607
ADX16588	0.00289452	0.00318021	0.00371605	0.00178245	0.00120297	0.00111143
ADX16589	5.42e-05	4.05e-05	0.000103417	0.000156289	3.28e-05	5.4e-05
ADX16590	0.00246432	0.00185471	0.00192639	0.0203195	0.0109602	0.0111474
ADX16591	0.00145693	0.000726768	0.000231849	0.00855935	0.0013233	0.00188992
ADX16592	0.000175618	7.96e-05	4.07e-05	0.000605549	0.000322242	0.000293125
ADX16593	0.000474905	0.000493539	0.000755738	0.00566162	0.000926593	0.000884572
ADX16594	0.0010672	0.00120667	0.00133599	0.0179365	0.00186683	0.00190261
ADX16595	0.000844974	0.00100617	0.00111042	0.00705712	0.00134239	0.00137079
ADX16596	0.00166537	0.00154281	0.00223372	0.00850879	0.00247301	0.00220778
ADX16597	0.000448038	0.0005689	0.000466681	0.00800989	0.000830328	0.000967295
ADX16598	0.000223979	0.000223457	0.000205303	0.000406299	0.00031103	0.000379047
ADX16599	0.00172202	0.00182405	0.00178629	0.0118499	0.00317534	0.0037845
ADX16600	0.00285071	0.0027195	0.00365566	0.0124733	0.00808059	0.00793981
ADX16601	0.0115356	0.0117894	0.0119737	0.0316835	0.00726896	0.00786094
ADX16602	0.00547365	0.00571487	0.00621212	0.0148344	0.00530988	0.00592754
ADX16603	0.0101666	0.0103883	0.00981155	0.0621955	0.00728137	0.00589043
ADX16604	0.00555457	0.00476942	0.00585418	0.0279305	0.0052932	0.00497921
ADX16605	0.00242624	0.00268306	0.00271665	0.00347084	0.00125083	0.00121341
ADX16606	0.0011061	0.00107448	0.00163049	0.00513616	0.000916515	0.000697076
ADX16607	0.0129635	0.0123592	0.011462	0.0158801	0.00729629	0.00659272
ADX16608	0.00327062	0.00322633	0.00294738	0.00496936	0.00264056	0.00187746
ADX16609	0.0230821	0.0226654	0.0222228	0.0282927	0.0191364	0.0197577
ADX16610	0.00610246	0.0061544	0.00622779	0.0199356	0.00516785	0.00573185
ADX16611	0.00257919	0.0036837	0.00400933	0.00385038	0.00221384	0.00175547
ADX16612	0.00173052	0.00191314	0.00154812	0.00759728	0.00241669	0.00220281
ADX16613	0.00059542	0.000723976	0.000568512	0.00199449	0.000781165	0.000549573
ADX16614	0.000710256	0.000581415	0.000811471	0.00259784	0.00052932	0.000436135
ADX16615	0.000592719	0.000402109	0.000407472	0.00115339	0.000488107	0.000454224
ADX16616	0.00134437	0.00134124	0.00157983	0.00127904	0.00123567	0.00155197
ADX16617	0.00492442	0.00433672	0.0053017	0.00671724	0.00147251	0.00169859
ADX16618	0.000165961	0.00013547	0.000115245	0.00115695	0.000231437	0.00015657
ADX16619	0.000153576	9.58e-05	0.000158855	0.00132963	0.000263481	0.000260515
ADX16620	0.000887399	0.000990726	0.00110283	0.0073693	0.00136466	0.00151797
ADX16621	0.00324518	0.00418521	0.00352678	0.0189917	0.0043454	0.00334874
ADX16622	0.0157825	0.0146651	0.0146753	0.0490557	0.0144911	0.0160572
ADX16623	0.00359915	0.00383308	0.00421657	0.00342284	0.00279884	0.0026087
ADX16624	0.00192641	0.00192191	0.00187472	0.00161896	0.00210863	0.00208489
ADX16625	0.0113157	0.011659	0.0110674	0.0171096	0.00902076	0.00960182
ADX16626	0.00315402	0.00401901	0.00337922	0.0245645	0.00549624	0.00476131
ADX16627	0.00262068	0.00203661	0.00200179	0.00250206	0.00329623	0.00339126
ADX16628	0.00495047	0.00551036	0.00572939	0.00870355	0.00647415	0.00649925
ADX16629	0.0050346	0.00474509	0.00513936	0.00514604	0.0042333	0.00433382
ADX16630	0.00410794	0.0037831	0.00417372	0.00931479	0.00545322	0.0049504
ADX16631	0.00197977	0.00183222	0.00200637	0.00878498	0.00571001	0.00561455
ADX16632	0.00117471	0.000868127	0.000996999	0.026547	0.00783318	0.0064947
ADX16633	0.00127695	0.00153246	0.00108377	0.00628691	0.0021665	0.00211256
ADX16634	0.00131975	0.00158447	0.00159472	0.00413147	0.000975215	0.00112495
ADX16635	0.00156412	0.00165075	0.00172794	0.00770619	0.00187856	0.0020122
ADX16636	0.00473138	0.0043308	0.0049123	0.0127264	0.00700936	0.00650877
ADX16637	0.0395556	0.0399202	0.0378591	0.0525576	0.0335762	0.0342493
ADX16638	0.0025541	0.00280782	0.00260954	0.00452047	0.00450503	0.00449329
ADX16639	0.00722434	0.00720749	0.00780462	0.0208489	0.0131029	0.012996
ADX16640	0.00183622	0.00180661	0.00179902	0.010096	0.0224901	0.0225004
ADX16641	0.0049445	0.00488729	0.00498333	0.0505281	0.0107562	0.0101965
ADX16642	0.0262666	0.0265343	0.0265137	0.0299272	0.0435223	0.0435588
ADX16643	1.66e-05	0	2.11e-05	1.37e-05	1.34e-05	0
ADX16644	0.000240565	0.000174548	0.000111366	0.000865558	0.000459069	0.000523733
ADX16645	0.000362968	0.000384069	0.000196037	0.00189547	0.000222004	0.000210725
ADX16646	0.000321132	0.000253636	0.000255516	0.00407113	0.000756199	0.000587469
ADX16647	0.00017895	0.000334748	0.000284771	0.00151241	0.000632084	0.000553544
ADX16648	0.00162646	0.00153252	0.00161047	0.00266356	0.00109428	0.00100983
ADX16649	0.00973824	0.0108002	0.00998525	0.0025741	0.00268344	0.00277722
ADX16650	0.0952172	0.10235	0.0913052	0.16576	0.0316177	0.0290551
ADX16651	0.00736123	0.00659357	0.00629321	0.00655704	0.00494539	0.00579047
ADX16652	0.0181417	0.0161858	0.0184156	0.0149587	0.0144855	0.0134612
ADX16653	0.0118318	0.0124053	0.0121178	0.0121999	0.00836575	0.00877173
ADX16654	0.0216223	0.0207914	0.0225195	0.0150334	0.0120181	0.0116746
ADX16655	0.0133774	0.0141229	0.0138541	0.0121975	0.0199434	0.0191116
ADX16656	0.0247439	0.0240038	0.0249084	0.023474	0.0223141	0.0227259
ADX16657	0.00763049	0.00705904	0.00674107	0.00552908	0.00720596	0.00747556
ADX16658	0.0216445	0.0211109	0.022192	0.0192044	0.0208369	0.0203704
ADX16659	0.0277253	0.0272321	0.0264972	0.0145215	0.0191685	0.0178929
ADX16660	0.000920476	0.00114791	0.00096258	0.0143392	0.0194812	0.0187633
ADX16661	5.14e-05	5.12e-05	6.54e-05	0.000719963	0.00121639	0.00102503
ADX16662	0.000271493	0.00040629	0.000311069	0.0054174	0.00416465	0.00364098
ADX16663	0.00357236	0.00341171	0.0027987	0.0104732	0.00253905	0.00238861
ADX16664	0.000968826	0.00116655	0.000829349	0.0071345	0.00180713	0.00177345
ADX16665	0.0117163	0.0108324	0.0114118	0.0163231	0.00992809	0.0103606
ADX16666	0.00190328	0.00188189	0.00179563	0.0246471	0.00260678	0.00246891
ADX16667	0.00296314	0.00324861	0.0030676	0.0211301	0.017088	0.0188451
ADX16668	0.413959	0.415625	0.415824	0.315006	0.611764	0.62257
ADX16669	0.00627757	0.00632386	0.00570623	0.0176433	0.00777	0.00813101
ADX16670	0.0152297	0.0161745	0.0145936	0.0611678	0.00709543	0.00797422
ADX16671	0.00117372	0.00132711	0.00109577	0.0133555	0.00574884	0.00618384
ADX16672	0.00798528	0.00792113	0.00772607	0.0112308	0.00845475	0.00908809
ADX16673	0.0102896	0.0114302	0.0113932	0.0230644	0.0112394	0.0101811
ADX16674	0.00155036	0.00139944	0.00185625	0.00760921	0.00143051	0.00122287
ADX16675	0.0162563	0.0159828	0.0169033	0.0805444	0.00655499	0.00595923
ADX16676	0.340669	0.344205	0.342675	0.0387267	0.0880077	0.0873274
ADX16677	0.0119335	0.0125374	0.0141691	0.0122696	0.0242635	0.0239515
ADX16678	0.00178382	0.00234394	0.00227094	0.0109058	0.0018617	0.00197967
ADX16679	0.0141323	0.0132454	0.0143051	0.00938526	0.00585193	0.00614951
ADX16680	0.00524057	0.00544238	0.00425269	0.00562249	0.00258562	0.00274
ADX16681	0.00662393	0.0057744	0.00761406	0.00869638	0.00337488	0.00256684
ADX16682	0.0015085	0.00151878	0.00133902	0.00502095	0.000748615	0.000607617
ADX16683	0.00743216	0.00699353	0.00684541	0.00468898	0.0047276	0.00440471
ADX16684	0.00187924	0.00162897	0.00188256	0.0222014	0.00430293	0.00462338
ADX16685	0.000890999	0.000716872	0.000695223	0.00464502	0.00183319	0.00135369
ADX16686	0.00700866	0.0069366	0.007394	0.0207905	0.00317867	0.0033658
ADX16687	0.0109625	0.0109929	0.00970859	0.0134546	0.00744722	0.00837055
ADX16688	0.0101098	0.0109234	0.0105304	0.0106424	0.00916232	0.011005
ADX16689	0.120544	0.116004	0.122397	0.0749138	0.0988142	0.0964813
ADX16690	0.00882674	0.00939983	0.00909071	0.0164983	0.0170752	0.0159132
ADX16691	0.00499752	0.00551282	0.00612946	0.00670031	0.00903726	0.00903284
ADX16692	0.00515557	0.00525817	0.00542992	0.00550619	0.0051827	0.0053651
ADX16693	0.0147817	0.0155061	0.0157037	0.0189519	0.0124486	0.0132276
ADX16694	0.00764234	0.00685967	0.00764008	0.0177785	0.040183	0.041232
ADX16695	0.000233132	0.000232588	0.00018887	0.000454359	0.000188221	0.000203021
ADX16696	0.0170294	0.0167172	0.0172553	0.0128646	0.0113538	0.0115827
ADX16697	0.000846975	0.000845	0.000611988	0.00809734	0.00190358	0.00180906
ADX16698	7.45e-05	0.000136214	9.48e-05	0.00113601	0.000270566	0.000336878
ADX16699	0.000191336	0.000233309	0.000189455	0.00112189	0.000394773	0.000322446
ADX16700	0.00701313	0.00791498	0.00738163	0.00414348	0.00295737	0.00267429
ADX16701	1.06e-05	0	1.35e-05	0	1.71e-05	0
ADX16702	9.31e-05	0.000278704	0.000355642	0.00099815	0.00067662	0.000371669
ADX16703	0.0006431	0.00076992	0.00180118	0.0110826	0.00186916	0.0015401
ADX16704	0.000135627	0.00012629	0.000161153	8.95e-05	0.000364999	0.000252624
ADX16705	0.000167311	0.00016692	0.000212999	0.0108985	0.00135079	0.000934913
ADX16706	0.0102896	0.012507	0.010983	0.00385312	0.00493365	0.0046629
ADX16707	3.01e-05	6.01e-05	0.000115076	4.97e-05	4.87e-05	7.22e-05
ADX16708	0.000153959	0.000256	0.000130668	0.00287746	0.0004972	0.00040967
ADX16709	0.00993479	0.00825968	0.0102387	0.0522709	0.0108855	0.0128401
ADX16710	0.00220491	0.000244419	0.00155946	0.00646421	0.00178015	0.00273796
ADX16711	6.08e-05	9.1e-05	7.74e-05	0.000375965	7.36e-05	0.000121328
ADX16712	0.000717879	0.000644584	0.000913916	0.0110887	0.00102393	0.00160457
ADX16713	0.0128535	0.0134095	0.0125962	0.0190547	0.0161588	0.0171491
ADX16714	0.012744	0.0133735	0.0130995	0.0468581	0.0112035	0.013941
ADX16715	0.00188061	0.00198343	0.00191533	0.00168356	0.00273298	0.00287379
ADX16716	0	2.92e-05	0	4.82e-05	0	2.33e-05
ADX16717	2.39e-05	1.19e-05	0	4.93e-05	9.65e-06	2.86e-05
ADX16718	0	1.16e-05	1.48e-05	9.61e-06	9.41e-06	0
ADX16719	0.000340152	0.000212099	0.00037891	0.00581979	0.000617905	0.000763687
ADX16720	0.00862327	0.00827067	0.00700052	0.0778011	0.00773562	0.00788134
ADX16721	0.00011083	0.000130676	0.000224471	0.00049431	0.000138287	0.000112602
ADX16722	0.0012066	0.0013041	0.00119474	0.00165816	0.00129887	0.00147154
ADX16723	0.000582286	0.000519777	0.000448679	0.00567303	0.00157117	0.00177366
ADX16724	0	0	0	0	0	1.27e-05
ADX16725	0.000460728	0.000459654	0.000391029	0.00544513	0.00173587	0.000980762
ADX16726	5.89e-05	0	2.14e-05	8.33e-05	5.44e-05	4.71e-05
ADX16727	0.000100061	0.000232931	0.000382156	0.00192512	0.000350068	0.000532505
ADX16728	0.000906153	0.000785087	0.000850023	0.0070391	0.00142467	0.00123732
ADX16729	0.000573636	0.000590183	0.00066182	0.00267535	0.00114335	0.000987383
ADX16730	0.000579288	0.000505695	0.000442487	0.00324802	0.00113415	0.00106358
ADX16731	0.000117194	9.35e-05	0.000119357	0.000676423	0.000170311	0.000205815
ADX16732	0.000126253	0.000188937	8.04e-05	5.21e-05	0.000560621	0.000554311
ADX16733	0.000128754	0.000149863	8.2e-05	0.000371574	0.000277202	0.000188431
ADX16734	5.41e-05	7.2e-05	4.59e-05	0.000304869	8.01e-05	0.000100784
ADX16735	0.000456248	0.000598927	0.000489128	0.00344519	0.000872421	0.000824264
ADX16736	2.24e-05	4.48e-05	4.28e-05	0.000138707	5.43e-05	0.000116382
ADX16737	8.92e-05	8.9e-05	0.000151439	0.000318773	0.000264108	0.000142437
ADX16738	0.000794418	0.00103788	0.000866876	0.00393021	0.00177143	0.00144951
ADX16739	0.000160399	6.4e-05	8.17e-05	0.000899346	0.000181299	0.000179259
ADX16740	0.00129803	0.00124105	0.00123937	0.00497239	0.0025981	0.00241775
ADX16741	0.00367593	0.00372748	0.00360571	0.0105091	0.016858	0.0169088
ADX16742	0.00015991	7.36e-05	0.000187918	0.000831692	0.000536281	0.000441871
ADX16743	0.000797082	0.000578344	0.000461249	0.0110535	0.00111155	0.00173533
ADX16744	0.000163183	0.000144713	0.000184662	0.0015025	0.00020494	0.000173686
ADX16745	0.000565104	0.000505058	0.000824337	0.00654279	0.000979017	0.00100559
ADX16746	2.11e-05	0	2.68e-05	0.000191048	0.000119041	0.000100887
ADX16747	0.000233855	0.000449953	0.000446573	0.00220371	0.000525955	0.000493366
ADX16748	0.000339218	0.000789662	0.0011516	0.00522109	0.00246483	0.00379102
ADX16749	0.00102068	0.000715565	0.000491669	0.0102812	0.00175947	0.00162956
ADX16750	0.00036872	0.00018393	0.000176029	0.00304028	0.000576773	0.000533488
ADX16751	7.96e-05	0	0	0	0	2.12e-05
ADX16752	0.000256279	0.000255681	0.000228384	0.000507154	0.000641417	0.000490992
ADX16753	0.00207037	0.00212767	0.00212049	0.010692	0.0108712	0.0112832
ADX16754	0.000703803	0.000702162	0.000537598	0.00292481	0.00263654	0.00247203
ADX16755	0.00200447	0.00213771	0.00205907	0.00781556	0.00331477	0.00336206
ADX16756	0.00259336	0.0025427	0.00253309	0.00242408	0.00125446	0.00131172
ADX16757	0.00439374	0.00434602	0.00439836	0.0108376	0.0104297	0.0103423
ADX16758	0.00238553	0.00314156	0.00263204	0.00891701	0.00261933	0.00203125
ADX16759	0.0111716	0.0104554	0.0119767	0.00975335	0.00414671	0.00476267
ADX16760	0.0110347	0.0107267	0.0104219	0.0143089	0.00377678	0.0040053
ADX16761	0.0389922	0.038496	0.0351617	0.0680974	0.0155217	0.0176166
ADX16762	0.0051301	0.00500081	0.00486551	0.0112962	0.00318054	0.00364931
ADX16763	0.00616037	0.00685858	0.00750164	0.0153122	0.00342387	0.00367041
ADX16764	0.000711966	0.00082869	0.000582678	0.00916916	0.0277141	0.028187
ADX16765	0.0177703	0.0174001	0.0176788	0.00706629	0.00443138	0.00440438
ADX16766	0.0120188	0.0125203	0.0125764	0.00775019	0.0047688	0.00485179
ADX16767	0.0107632	0.0114253	0.0130447	0.0540295	0.0238446	0.024951
ADX16768	0.0975244	0.0993022	0.0987951	0.056684	0.101857	0.105694
ADX16769	0.000863114	0.000789936	0.000844541	0.00209975	0.00070836	0.000734552
ADX16770	0.00756936	0.0077877	0.00722729	0.104152	0.0166148	0.019449
ADX16771	0.012733	0.0133899	0.0134061	0.0862615	0.0177817	0.0151641
ADX16772	0.00436956	0.00407812	0.00358889	0.013017	0.00489339	0.00382564
ADX16773	0.0122973	0.0131199	0.0133551	0.0942789	0.0210724	0.0202342
ADX16774	0.0209434	0.026527	0.024576	0.0641201	0.0467566	0.0491379
ADX16775	0.000825369	0.000823444	0.000910658	0.00730464	0.00342069	0.00285509
ADX16776	0.00146546	0.00202597	0.00125264	0.003953	0.00292406	0.00302485
ADX16777	0.00761074	0.00649652	0.00584142	0.0133664	0.00374886	0.00425499
ADX16778	0.0107937	0.00999935	0.0106457	0.0664561	0.00617667	0.00653323
ADX16779	0.000992566	0.00105627	0.00134786	0.0103666	0.00208353	0.00132056
ADX16780	0.00266898	0.00273282	0.00196715	0.030636	0.0029487	0.00353225
ADX16781	0.0108637	0.00766616	0.0100073	0.00203914	0.0117658	0.0114219
ADX16782	0.00919569	0.00968582	0.00805117	0.0126559	0.00422269	0.00395685
ADX16783	0.0549435	0.0523595	0.0508936	0.220347	0.135701	0.134173
ADX16784	0.00553671	0.00612276	0.00462833	0.0182886	0.00269283	0.00244952
ADX16785	0.000986674	0.000703124	0.001615	0.0810074	0.0289052	0.0326305
ADX16786	0.000258208	0.000309127	0.000295847	0.0128169	0.0490521	0.0502521
ADX16787	0.00142821	0.00233162	0.00181822	0.0930326	0.238425	0.240405
ADX16788	0.00872558	0.0103477	0.0123659	0.545301	1.16915	1.17938
ADX16789	0.0001375	0.000274359	5.83e-05	0.132385	0.0210552	0.0206353
ADX16790	0.000119995	0	0	0.00190463	0.00331811	0.00375971
ADX16791	0.00663845	0.00587789	0.0051764	0.180496	0.0418049	0.0435866
ADX16792	0.00328203	0.00336287	0.00287962	0.0069849	0.00193362	0.00233671
ADX16793	0.00304572	0.002628	0.00256749	0.00957026	0.0025919	0.00200419
ADX16794	0.002278	0.00196452	0.00196615	0.0152494	0.00386535	0.0028972
ADX16795	0.000153791	0.000153433	7.34e-05	0.00153755	0.000217288	0.000222515
ADX16796	0.000262254	0.000246251	0.000157115	0.00345985	0.000560468	0.000418699
ADX16797	0.000309316	0.000318239	0.000381478	0.000462271	0.000288749	0.000285499
ADX16798	0.00070084	0.000381385	0.000243334	0.00472808	0.00298346	0.00284816
ADX16799	0.00117005	0.00109866	0.00113908	0.00436983	0.00255612	0.00225264
ADX16800	0.00036359	0.000435291	0.000324015	0.00293802	0.00132096	0.00101585
ADX16801	0.000256599	0.000256	0.00032667	0.00262357	0.00153303	0.00102417
ADX16802	5.11e-05	5.09e-05	3.25e-05	0.00124211	0.000597802	0.000652219
ADX16803	0.000258533	0.000412688	0.000460785	0.00230226	0.00137761	0.00111445
ADX16804	0.00156078	0.00126878	0.00169263	0.0192564	0.00214685	0.00281487
ADX16805	7.34e-05	3.99e-05	4.24e-05	0.000247435	9.15e-05	0.000106466
ADX16806	0.00254141	0.00265916	0.00205172	0.0181441	0.00235209	0.00331524
ADX16807	0.000455475	0.000537034	0.000579855	0.00201437	0.000869183	0.000760239
ADX16808	0.000463322	0.000462241	9.83e-05	0.0110152	0.000872821	0.000986282
ADX16809	0.00195428	0.00168385	0.00109319	0.00251476	0.00423139	0.00460923
ADX16810	0.00293191	0.00245149	0.00295049	0.00561781	0.00570358	0.00610747
ADX16811	0.00511557	0.00504531	0.00539609	0.11032	0.00507411	0.00464364
ADX16812	0.000245722	0.000232891	0.000179873	0.000410284	0.000143829	0.000186345
ADX16813	0.00127557	0.00101808	0.00129912	0.00385649	0.00034328	0.00135767
ADX16814	8.39e-05	8.37e-05	0.00014245	0.000953375	0.000105395	0.000193531
ADX16815	0.00710649	0.00664679	0.00735078	0.0435811	0.02803	0.0291918
ADX16816	0.000850088	0.00144885	0.00130769	0.0050526	0.0124682	0.0128086
ADX16817	0.000829121	0.000890817	0.00075782	0.0720462	0.0106245	0.0113705
ADX16818	0.000328741	0.000655949	0.000795175	0.0813731	0.00552056	0.00614073
ADX16819	0	0	0	0	0.000107192	0.000211971
ADX16820	0.000137654	0.000137332	0	0.00136202	0.00261169	0.00291194
ADX16821	0.00425984	0.00416011	0.00454471	0.00583758	0.00433534	0.00402313
ADX16822	0.0178856	0.015479	0.0183804	0.0514387	0.0231389	0.0221904
ADX16823	0.00274489	0.00286569	0.00271155	0.00566443	0.00408709	0.00383754
ADX16824	0.00319895	0.00331345	0.00303492	0.00703943	0.00755067	0.0069452
ADX16825	0.00212627	0.00219707	0.00169181	0.0391028	0.0274358	0.029673
ADX16826	0.00432367	0.00507263	0.00380345	0.0114144	0.00293642	0.00294781
ADX16827	0.000605271	0.000603859	0.000758128	0.00607744	0.00124532	0.00120792
ADX16828	5.4e-05	4.31e-05	0.000109906	0.000729638	0.000575026	0.000508253
ADX16829	0.000164239	0.000114699	0.000104545	0.00369706	0.0021879	0.00194039
ADX16830	2.51e-05	7.51e-05	3.19e-05	0.00145888	0.00188436	0.00234396
ADX16831	0.00106003	0.00102109	0.000651483	0.02161	0.0034528	0.00318051
ADX16832	0.0112138	0.00995825	0.0112953	0.0517185	0.0211913	0.0292158
ADX16833	0.000794564	0.00118907	0.00085981	0.00406197	0.000737722	0.000887987
ADX16834	0.00184745	0.00171482	0.00180118	0.00153295	0.00128387	0.00126008
ADX16835	0.0125205	0.012991	0.0132154	0.023801	0.0118362	0.0115939
ADX16836	0.00235668	0.00222159	0.00205528	0.00128526	0.00149818	0.00185164
ADX16837	0.0147976	0.0159329	0.0189415	0.0112679	0.0045046	0.00480891
ADX16838	0.00153068	0.00115382	0.000909384	0.00835806	0.00156536	0.00138482
ADX16839	1.91e-05	9.54e-06	0	0.000141864	4.63e-05	5.34e-05
ADX16840	0.000184567	0.000184136	0.000117484	0.000608737	0.000558793	0.000331502
ADX16841	5.01e-05	8e-05	5.1e-05	0.000867428	0.000307381	0.00027193
ADX16842	8.99e-05	0.000134484	0.000171609	0.00274164	0.000362768	0.000358685
ADX16843	0.00133672	0.00148867	0.00154344	0.050598	0.00175685	0.00250635
ADX16844	0.00499639	0.00478733	0.00459741	0.0192528	0.0103044	0.00935909
ADX16845	0.00603743	0.00628242	0.00752083	0.0142386	0.00618468	0.00575231
ADX16846	0.00203923	0.00169539	0.00179563	0.00253617	0.00222262	0.00199412
ADX16847	0.00766087	0.00835485	0.00798398	0.027032	0.012552	0.0123808
ADX16848	0.00339728	0.0028773	0.00404497	0.00761771	0.00205218	0.00202908
ADX16849	0.0708921	0.0762066	0.0749606	0.0883451	0.0459419	0.0476464
ADX16850	0.0739976	0.0751355	0.0794727	0.0510604	0.0425217	0.0402955
ADX16851	0.00137403	0.000778877	0.00127218	0.00244615	0.00368097	0.00423781
ADX16852	0.00612476	0.00953235	0.0077973	0.0563598	0.0660635	0.0731427
ADX16853	0.013956	0.0127435	0.0102387	0.0512957	0.014705	0.013973
ADX16854	0.00765667	0.0077294	0.0081679	0.00940756	0.00395823	0.00328555
ADX16855	0.0137351	0.0146417	0.0146415	0.00302525	0.00191782	0.00155829
ADX16856	0.0132295	0.0127796	0.0141688	0.0541954	0.008816	0.0088844
ADX16857	0.00199361	0.00263056	0.00180118	0.00212107	0.000934581	0.000924062
ADX16858	0.000181049	0.000240835	0.000460978	0.00044785	0.000243618	4.82e-05
ADX16859	0.000106505	0.000106257	6.03e-05	0.000439094	0.000162422	0.00011336
ADX16860	0.0141633	0.0148549	0.0135618	0.0799518	0.0180808	0.0202931
ADX16861	0.0505126	0.0587939	0.0573995	0.0527567	0.0703862	0.0754184
ADX16862	0.00546759	0.00600689	0.00587044	0.0044757	0.0034357	0.00339704
ADX16863	0.00580865	0.00594562	0.00601192	0.00609574	0.00643152	0.00685293
ADX16864	0.0149199	0.0124999	0.0142553	0.0635322	0.0187161	0.0204381
ADX16865	0.010139	0.0120183	0.0106713	0.0550029	0.0368362	0.0389859
ADX16866	0.00237143	0.0023258	0.00225147	0.0183274	0.00256361	0.0035294
ADX16867	0.00151511	0.00178761	0.00162695	0.0235083	0.00388245	0.00424892
ADX16868	0.00537866	0.00601938	0.00529933	0.00929413	0.0154064	0.0161664
ADX16869	0.00202759	0.00191136	0.0023577	0.00401506	0.00355755	0.00347927
ADX16870	0.00310232	0.00288501	0.00364569	0.00394698	0.00306002	0.0024877
ADX16871	0.0240615	0.0239088	0.0235205	0.015154	0.0374076	0.0374306
ADX16872	0.0341743	0.028882	0.0345473	0.023079	0.0579795	0.0545606
ADX16873	0.0267299	0.0267954	0.028548	0.0726499	0.0198426	0.0200693
ADX16874	0.0236752	0.0238017	0.0236155	0.0303761	0.0189883	0.0182554
ADX16875	0.00764242	0.00802746	0.00717805	0.0162533	0.0107948	0.0106136
ADX16876	0.0165598	0.0154671	0.0176024	0.00607913	0.0137591	0.0118075
ADX16877	0.026459	0.0282359	0.0264782	0.0123556	0.0239657	0.0235383
ADX16878	0.0697533	0.0642026	0.0703463	0.0432651	0.0554897	0.0500548
ADX16879	0.15149	0.141599	0.149587	0.0539709	0.116947	0.108211
ADX16880	0.048378	0.0458418	0.0462991	0.0158002	0.0335564	0.0290852
ADX16881	0.0139133	0.0156662	0.0147511	0.00767273	0.0113594	0.0110352
ADX16882	0.028538	0.0288117	0.0280082	0.0112499	0.0228109	0.0220096
ADX16883	0.0224451	0.0222621	0.0214481	0.0325515	0.0334938	0.0334478
ADX16884	0.0393747	0.0382612	0.0372168	0.029552	0.0627521	0.0605955
ADX16885	0.066252	0.0635818	0.0684486	0.03776	0.042916	0.0437316
ADX16886	0.0112431	0.0104559	0.0109989	0.00503177	0.00242327	0.00280635
ADX16887	0.0067993	0.00569809	0.00796355	0.0353574	0.00739248	0.0091185
ADX16888	0.00172644	0.00182576	0.00180228	0.00347343	0.00281559	0.0022602
ADX16889	1.16142	1.16144	1.13932	0.240674	0.274985	0.275425
ADX16890	0.44005	0.436934	0.435969	0.0336323	0.115806	0.121388
ADX16891	0.227326	0.230712	0.227823	0.17712	0.0768219	0.0825622
ADX16892	0.0326106	0.0329207	0.0327692	0.0109311	0.0125001	0.0119217
ADX16893	0.0631443	0.0620614	0.0658621	0.0265053	0.0209052	0.0215848
ADX16894	0.0203143	0.0206297	0.0198707	0.0251102	0.00778319	0.00788218
ADX16895	0.127044	0.131639	0.124007	0.0417083	0.0749039	0.0778661
ADX16896	0.132818	0.133026	0.138225	0.0232122	0.0364095	0.0355854
ADX16897	0.00454814	0.00411073	0.0039843	0.0085214	0.0024904	0.00230061
ADX16898	0.0155617	0.0142195	0.0143492	0.0476678	0.0126812	0.0115517
ADX16899	0.00206342	0.00185275	0.00175126	0.00186019	0.00137716	0.00136166
ADX16900	0.00699088	0.0064311	0.00693501	0.00409241	0.00520433	0.00437269
ADX16901	0.00338847	0.00297349	0.00316194	0.0200258	0.00571491	0.006387
ADX16902	0.0190328	0.0186917	0.018362	0.0474236	0.0435057	0.046577
ADX16903	0.00106112	0.00102656	0.00106433	0.00727791	0.00101246	0.000885559
ADX16904	0.00387023	0.00445524	0.0041454	0.0239493	0.00533295	0.00510954
ADX16905	0.0411584	0.0476702	0.043966	0.0353024	0.0498443	0.0513604
ADX16906	0.0374836	0.0413068	0.0377389	0.0244428	0.0445039	0.0475232
ADX16907	0.0189479	0.0163999	0.0191699	0.127161	0.0152977	0.0173293
ADX16908	0.00434401	0.003918	0.00421752	0.0434344	0.00687264	0.00665517
ADX16909	0.00533328	0.00529298	0.00543885	0.00815043	0.0112944	0.0117469
ADX16910	0.0446502	0.0446572	0.0440274	0.00765728	0.00620805	0.00658297
ADX16911	0.00380521	0.0040675	0.00365796	0.0164243	0.012947	0.0131112
ADX16912	0.00694208	0.00749278	0.00669913	0.0268278	0.00590393	0.00617274
ADX16913	0.00267134	0.00335606	0.00295998	0.000815795	0.000998484	0.000473878
ADX16914	0.00218817	0.00285878	0.00172449	0.0217369	0.00618322	0.00827627
ADX16915	0.0208958	0.0192677	0.0204352	0.08466	0.0195799	0.0211286
ADX16916	0.022117	0.0215239	0.0221107	0.0249866	0.0102975	0.00920677
ADX16917	0.00814122	0.00902471	0.00708235	0.00596696	0.00405327	0.0043687
ADX16918	0.0237355	0.0218538	0.0221807	0.0272746	0.0123337	0.0132531
ADX16919	0.023023	0.0200179	0.0234153	0.0486255	0.0143302	0.0147337
ADX16920	0.0193574	0.019617	0.0189079	0.0132222	0.0184026	0.0175555
ADX16921	0.00603398	0.00621321	0.00665985	0.00256753	0.00360899	0.00350209
ADX16922	0.00511805	0.00476808	0.00542595	0.0060728	0.00257716	0.00280439
ADX16923	0.000848081	0.00113695	0.000742275	0.00372587	0.00162617	0.00184059
ADX16924	0.00157804	0.0016228	0.00165868	0.00045374	0.000418146	0.000574939
ADX16925	0.0224735	0.029723	0.0286105	0.037842	0.00966299	0.0101728
ADX16926	0.00275123	0.00285461	0.00371268	0.0457334	0.0190581	0.0210838
ADX16927	0	0	2.16e-05	1.4e-05	0	0
ADX16928	0.00333887	0.00291208	0.00320803	0.0144579	0.00371289	0.00340289
ADX16929	0.0069445	0.0073967	0.00754589	0.00675838	0.00638058	0.00641807
ADX16930	0.0343583	0.033207	0.0336258	0.0660445	0.0569237	0.0578543
ADX16931	0.0250653	0.0246872	0.0246125	0.0931215	0.0465961	0.0466401
ADX16932	0.0473423	0.0471308	0.0468483	0.0430483	0.0248812	0.0229827
ADX16933	0.0575489	0.0539626	0.0623674	0.0364899	0.0251427	0.0274765
ADX16934	0.0151859	0.015426	0.0156069	0.0221137	0.00863433	0.00784654
ADX16935	0.00192179	0.00295585	0.00254853	0.00508396	0.00193947	0.00223724
ADX16936	0.00243591	0.00259783	0.00278029	0.00187	0.00223791	0.00254798
ADX16937	0.007579	0.00727666	0.00765081	0.0622278	0.0120795	0.0120432
ADX16938	0.0639058	0.0687062	0.0666669	0.0518753	0.109836	0.106516
ADX16939	0.00276722	0.0027925	0.00327993	0.0217155	0.0450165	0.0442306
ADX16940	0.000408858	0.000271937	0.00030363	0.00627892	0.000715205	0.000897543
ADX16941	0.0103248	0.00966795	0.00816473	0.0125811	0.00657194	0.00694804
ADX16942	0.00241734	0.00209437	0.00198415	0.0104119	0.00778095	0.0073379
ADX16943	0.00151613	0.0013124	0.00141923	0.00174649	0.000342016	0.000231377
ADX16944	2.61e-05	1.3e-05	1.66e-05	0.000237172	0.000306117	0.000417478
ADX16945	0.00195064	0.00194609	0.00242123	0.0683165	0.217685	0.215702
ADX16946	0.00927118	0.00959992	0.010104	0.0359061	0.0818263	0.0827556
ADX16947	0.00231087	0.00239894	0.00186851	0.0299975	0.019968	0.0185716
ADX16948	9.89e-05	0.000197415	0.000251913	0.000530267	0.00059909	0.000473878
ADX16949	0.00035657	0.000355739	0.000194546	0.000798026	0.000945891	0.000813256
ADX16950	0.00772457	0.00817719	0.00694384	0.0268385	0.0135679	0.0136977
ADX16951	0.00120654	0.00115287	0.00129805	0.0183557	0.0025519	0.00203482
ADX16952	0.00168995	0.00195794	0.00159623	0.00636039	0.00288283	0.00295917
ADX16953	0.00278951	0.00364941	0.00318273	0.0135401	0.00252834	0.00254189
ADX16954	0.00142628	0.00209087	0.00151932	0.0277689	0.00813113	0.0088064
ADX16955	0.000354492	0.000446735	0.000332534	0.00319987	0.00117493	0.00150427
ADX16956	0.000801506	0.000994143	0.000854912	0.00300075	0.00171394	0.00195404
ADX16957	0.000185845	0.000284297	0.000331233	0.000725326	0.000500144	0.000534075
ADX16958	0.000215941	0.000193894	0.000247419	0.0006588	0.000714801	0.00067228
ADX16959	0.000558973	0.000557669	0.000498949	0.00348589	0.000897395	0.00076933
ADX16960	0.000536476	0.000599451	0.000409785	0.00313184	0.00195774	0.00241534
ADX16961	0.00362367	0.00326449	0.00271973	0.0121522	0.00377708	0.00347552
ADX16962	0.0021143	0.00224999	0.00251223	0.010925	0.00349934	0.00343183
ADX16963	0.000739373	0.000983531	0.000784399	0.00955116	0.00517346	0.00570545
ADX16964	0.0068729	0.00764502	0.00789488	0.0146887	0.00475163	0.00510806
ADX16965	0.0155831	0.0169709	0.0199899	0.0274635	0.0866273	0.0882161
ADX16966	0.00015258	0.00019028	4.86e-05	0.00445051	0.000600534	0.0007308
ADX16967	0.00297999	0.00308076	0.00318896	0.0194435	0.00521282	0.00592985
ADX16968	0.00795257	0.00848653	0.00738872	0.0143018	0.0047573	0.00495132
ADX16969	0.00157008	0.00139858	0.0010708	0.0173153	0.00194669	0.00176811
ADX16970	0.0027032	0.00234891	0.00233126	0.00301983	0.00485771	0.00424616
ADX16971	0.000315072	0.000330882	0.000422223	0.00218773	0.000401646	0.000450076
ADX16972	0.000432443	0.000304542	0.000420996	0.00138433	0.00055451	0.0006498
ADX16973	0.00110749	0.000743302	0.000743414	0.00953028	0.0115751	0.011268
ADX16974	0.00115577	0.00118511	0.0013079	0.00103241	0.000388801	0.000538195
ADX16975	0.0007379	0.000572583	0.000521891	0.00375201	0.00241609	0.00291249
ADX16976	0.00315014	0.00370953	0.00305709	0.011284	0.00448203	0.00472015
ADX16977	0.00149354	0.0012035	0.00109695	0.00677321	0.000892769	0.000997359
ADX16978	0.000396108	0.000303281	0.000199365	0.000607647	0.00021568	0.000117656
ADX16979	0.00278392	0.00299527	0.00187632	0.014133	0.00299683	0.0019173
ADX16980	0.00154069	0.00192137	0.00189137	0.00358427	0.00191026	0.00245977
ADX16981	0.000580605	0.000450528	0.000533834	0.00531929	0.00182294	0.00200841
ADX16982	0.000674319	0.00049833	0.000508717	0.00113261	0.00161308	0.0017943
ADX16983	0.00204788	0.0021032	0.00212147	0.0219018	0.00706736	0.00684357
ADX16984	0.00455628	0.00481082	0.00401201	0.01844	0.0305933	0.029279
ADX16985	0.0014843	0.0017585	0.00135817	0.0126977	0.0161779	0.0162673
ADX16986	0.000305443	0.000380913	0.000194426	0.0011963	0.00277427	0.00304782
ADX16987	0.0318573	0.029067	0.0322639	0.177408	0.0660143	0.0658922
ADX16988	0.00232217	0.00143798	0.00234465	0.0144596	0.00252131	0.00294038
ADX16989	0.00153544	0.00170207	0.00206333	0.00566204	0.00256539	0.00223009
ADX16990	0.00096745	0.000846033	0.000904722	0.00134921	0.000573755	0.000433815
ADX16991	0.0926493	0.0914229	0.0900465	0.0276393	0.0428464	0.0425971
ADX16992	0.0125941	0.0113053	0.0118474	0.302481	0.0333718	0.0310745
ADX16993	0.00600503	0.00594151	0.00574944	0.00556525	0.00977654	0.00958726
ADX16994	0.00275594	0.00299742	0.00307715	0.00337136	0.00160494	0.00142458
ADX16995	0.00511347	0.00447635	0.0049462	0.0132069	0.0038046	0.00412195
ADX16996	0.00645313	0.00618292	0.00653721	0.0069756	0.00398691	0.00444461
ADX16997	0.00364561	0.00345262	0.00380036	0.00492284	0.00390309	0.0034163
ADX16998	0.00745742	0.00760264	0.00788562	0.0103659	0.00508313	0.00496086
ADX16999	0.0163346	0.0143457	0.0163022	0.00977215	0.0104925	0.00970818
ADX17000	0.00231878	0.00272906	0.0032518	0.00389858	0.00310064	0.00334051
ADX17001	0.00311451	0.00352489	0.00411423	0.0163887	0.00720559	0.0078062
ADX17002	0.022085	0.0245373	0.0225779	0.0172445	0.0402537	0.0423382
ADX17003	0.00858216	0.00793455	0.00652113	0.0138564	0.00867016	0.00753238
ADX17004	0.000204938	0.000238537	0.000217418	0.00481597	0.00284037	0.0028493
ADX17005	0.000257011	0.000256411	0.000163597	0.00273979	0.00198607	0.00219818
ADX17006	0.000154731	0.000210505	0.000214892	0.00229649	0.00220319	0.00202119
ADX17007	0.000366395	0.000639696	0.000621933	0.00684784	0.00438788	0.00472847
ADX17008	0.000150213	0.000179835	0.000133863	0.00143675	0.00106723	0.000743446
ADX17009	0.00139951	0.00107892	0.00109331	0.0559673	0.00680512	0.00710939
ADX17010	0.00175218	0.0017481	0.00175267	0.00800514	0.00321902	0.00322561
ADX17011	0.00624965	0.0066359	0.00636503	0.0103431	0.00735231	0.00737646
ADX17012	6.26e-05	0	7.96e-05	0.000361033	0	0
ADX17013	0.00617097	0.00626801	0.00629201	0.116431	0.0817663	0.0829858
ADX17014	0.000724388	0.000739123	0.000586856	0.000855215	0.00233936	0.00244445
ADX17015	0.00411584	0.00426119	0.0035591	0.0268295	0.0207528	0.0206432
ADX17016	0.000347869	0.000255727	0.000419556	0.000981277	0.00115298	0.00135924
ADX17017	0.000708	0.000894709	0.000901339	0.00971021	0.00308669	0.00284472
ADX17018	0.00545261	0.00561537	0.00358276	0.0500354	0.0191709	0.0188147
ADX17019	0.00545979	0.00645266	0.00630913	0.0283271	0.016886	0.0197804
ADX17020	0.00304146	0.00279792	0.00296686	0.0297682	0.0331977	0.0353465
ADX17021	0.00718331	0.00803816	0.00580825	0.00736371	0.00564275	0.0044169
ADX17022	0.0145541	0.0128027	0.0145439	0.0295498	0.0128243	0.0119929
ADX17023	0.00137195	0.00144479	0.00161722	0.00458779	0.0017025	0.00141968
ADX17024	0.00480305	0.0048287	0.00465654	0.0107843	0.0044147	0.00389311
ADX17025	0.0403127	0.0455624	0.045579	0.0848427	0.0760183	0.071112
ADX17026	0.0165175	0.0172894	0.0182703	0.144009	0.0811063	0.0706826
ADX17027	0.00635534	0.00483087	0.00346751	0.0306931	0.0200355	0.0149783
ADX17028	0.0137913	0.00978188	0.0108362	0.046819	0.0253136	0.0261468
ADX17029	0.0205792	0.0183826	0.017669	0.0240717	0.00975635	0.00955103
ADX17030	0.0139939	0.0159322	0.0150906	0.393806	0.616342	0.619261
ADX17031	0.00142746	0.00154281	0.00212014	0.399202	0.0574314	0.0574497
ADX17032	0.00749023	0.00649148	0.0053939	0.0575808	0.0266936	0.0231921
ADX17033	0.0218052	0.0221038	0.0197328	0.00606535	0.015625	0.013282
ADX17034	0.0636515	0.0641723	0.0632241	0.323915	0.0340898	0.0361316
ADX17035	0.719379	0.72049	0.704405	0.0869238	0.258125	0.268176
ADX17036	0.417417	0.410493	0.395654	0.035234	0.110113	0.111646
ADX17037	0.117367	0.11747	0.117077	0.0114854	0.0366766	0.0377316
ADX17038	0.0104798	0.00952783	0.00901092	0.00311845	0.00511749	0.00561647
ADX17039	0.0461258	0.0466251	0.0437832	0.482141	0.0468774	0.0477457
ADX17040	0.0287386	0.0277957	0.0271193	0.0327235	0.041735	0.0403995
ADX17041	0.00474368	0.00483701	0.00466252	0.00511932	0.00239365	0.0028679
ADX17042	0.00121695	0.00117787	0.00154927	0.00377412	0.00117315	0.00136294
ADX17043	0.00347195	0.00428258	0.00313423	0.00556943	0.00356759	0.00357783
ADX17044	0.0298821	0.0255937	0.0244045	0.055787	0.0368711	0.0398317
ADX17045	0.0121851	0.0151283	0.0130995	0.0493427	0.0365088	0.0341525
ADX17046	0.119359	0.113743	0.113703	0.0811096	0.0475183	0.0617684
ADX17047	0.00715523	0.00754917	0.00773876	0.00101811	0.000408979	0.000454923
ADX17048	0.0048547	0.0052214	0.00431122	0.00513547	0.00317382	0.00330824
ADX17049	0.00183929	0.00256207	0.00287172	0.00852719	0.00249362	0.00357366
ADX17050	4.85e-05	0	3.09e-05	2e-05	1.96e-05	0
ADX17051	0.190192	0.188672	0.194907	0.159012	0.192343	0.18415
ADX17052	0.0129829	0.0115746	0.0124841	0.107278	0.0101473	0.0100331
ADX17053	7.55e-05	3.77e-05	0	0.00102745	0.000304858	0.000120571
ADX17054	0.000451581	0.00054707	0.000328513	0.00515971	0.000520839	0.000411982
ADX17055	0.00190063	0.00163465	0.00250308	0.0169145	0.0023811	0.00219734
ADX17056	0.00271374	0.00236899	0.00187135	0.0345897	0.00237354	0.000992887
ADX17057	0.000224734	0.000512479	0.000449592	0.00206481	0.000233281	0.000333168
ADX17058	0.0178148	0.0153218	0.0125129	0.505257	0.0386851	0.0345719
ADX17059	0.00233602	0.00122077	0.00113293	0.0267828	0.00215543	0.00195357
ADX17060	0.00348519	0.00596067	0.00454256	0.0110843	0.00529261	0.00417318
ADX17061	0.00798331	0.00584077	0.00496876	0.0848427	0.00830739	0.00807226
ADX17062	0.000573922	0.000408988	0.000417513	0.0360328	0.00139008	0.00137444
ADX17063	0.000264684	0.00019805	0.000505445	0.00261894	0.000534237	0.000845158
ADX17064	0.00593061	0.00686346	0.00483208	0.0209784	0.00756523	0.00686463
ADX17065	0.00554457	0.00537557	0.00553187	0.0126404	0.00787237	0.00783926
ADX17066	0.00134776	0.00116361	0.00118786	0.00126089	0.00165311	0.00159312
ADX17067	0.00549086	0.00492565	0.00446439	0.0874299	0.0122562	0.0127444
ADX17068	0.00590033	0.00717874	0.00604591	0.0436673	0.0125482	0.0118326
ADX17069	0.00281158	0.00202585	0.00218739	0.000804959	0.00097734	0.00084165
ADX17070	0.00279811	0.00288785	0.0028603	0.00214806	0.00131316	0.00108932
ADX17071	0.00110417	0.00134107	0.00105937	0.00176811	0.000749344	0.000932525
ADX17072	0.00190469	0.00200641	0.00181523	0.00563278	0.0012285	0.00140154
ADX17073	0.0142471	0.0136396	0.0109926	0.0237322	0.00708742	0.00804156
ADX17074	0.000674319	0.000946828	0.000985639	0.00193573	0.000584743	0.000558225
ADX17075	0.00168626	0.00157932	0.00164291	0.00533459	0.00340353	0.00269218
ADX17076	0.00124868	0.000862454	0.0010394	0.00890997	0.00112445	0.00113097
ADX17077	1.00144	1.02561	0.990047	3.82973	1.09338	1.10638
ADX17078	0.0156804	0.0156438	0.0167527	0.0145517	0.0106242	0.0103246
ADX17079	0.000232271	9.27e-05	0.00011828	0.00114911	0.00112515	0.00103832
ADX17080	0.00458961	0.00539129	0.00395811	0.0470602	0.00753044	0.00590927
ADX17081	0.0015058	0.00159618	0.00107831	0.0181843	0.00215283	0.00257936
ADX17082	5.67e-05	3.77e-05	7.22e-05	0.00145044	0.00109951	0.00120792
ADX17083	1.11e-05	6.64e-05	4.23e-05	0.00180108	0.000626635	0.000584177
ADX17084	0.00171805	0.00111785	0.00128379	0.0103474	0.00144739	0.00172924
ADX17085	3.95e-05	0.000157478	0.000100475	0.00063449	0.000127438	0.000173255
ADX17086	4.22e-05	5.27e-05	1.34e-05	0.00067909	2.56e-05	5.06e-05
ADX17087	0.00217591	0.00214026	0.00206782	0.00621632	0.00586404	0.00599375
ADX17088	0.00329267	0.00425556	0.00314387	0.0182643	0.00652507	0.00681005
ADX17089	0.0051448	0.00562634	0.00585697	0.0150106	0.00603084	0.00584449
ADX17090	0.0031405	0.00247088	0.00286043	0.00511583	0.00783327	0.00776548
ADX17091	0.000100714	0.000234451	0.000192325	0.00462275	0.00111126	0.00115236
ADX17092	0.00203006	0.00178705	0.00164693	0.0100597	0.00258702	0.00246258
ADX17093	0.000236703	0.000236151	0.000336793	0.00272094	0.00616028	0.00626878
ADX17094	0.000781489	0.00105484	0.00111194	0.0213907	0.0126312	0.0130272
ADX17095	0.000212595	4.24e-05	0.00016239	0.00224377	0.000446265	0.000746717
ADX17096	0.000212157	0.000253994	0.00032411	0.010531	0.00318593	0.00342104
ADX17097	0.000249308	0.00015828	0.000144267	0.00371888	0.00170173	0.00184541
ADX17098	0.000174189	0.000148957	0.000190077	0.00900749	0.00468107	0.00494621
ADX17099	0.000307152	0.00153218	0.0013686	0.0141827	0.0292618	0.0311392
ADX17100	0.00199154	0.00168585	0.00184391	0.022492	0.0138375	0.0137781
ADX17101	0.00199361	0.00109072	0.00188305	0.015908	0.00794394	0.00821388
ADX17102	0.00100017	0.000892004	0.000733107	0.00363612	0.00588491	0.00533479
ADX17103	0.000830285	0.00136086	0.000830513	0.00567248	0.00507541	0.00558639
ADX17104	9.78e-05	0.000170687	0.000248921	0.00090687	0.00128261	0.00126818
ADX17105	0.000182251	0.000181826	0.00019335	0.00146518	0.000723448	0.000715305
ADX17106	0.000244344	0.000514634	0.000345632	0.00772315	0.00127132	0.00130035
ADX17107	0.000274146	0.000209688	0.000267573	0.00266735	0.000383645	0.000474158
ADX17108	0.000170076	0.000424198	0.00043304	0.0117798	0.00803276	0.0069241
ADX17109	1.48e-05	4.43e-05	3.77e-05	0.000975905	0.00117056	0.00116919
ADX17110	0	3.43e-05	0	0.000509906	0.00166425	0.00189235
ADX17111	0.000246458	0.000122941	0.0001961	0.00297204	0.00544706	0.0052382
ADX17112	0.000422334	0.000268131	0.000391029	0.00835764	0.00297578	0.00312618
ADX17113	7.18e-05	0.000143241	0.000121855	0.00710311	0.00268541	0.00269339
ADX17114	0.00262562	0.00226551	0.00271023	0.023873	0.00973969	0.0108763
ADX17115	2.21e-05	8.81e-05	5.62e-05	0.00245789	0.000891351	0.000863692
ADX17116	0.00116742	0.00102927	0.000794954	0.00989459	0.00451536	0.00450788
ADX17117	0.0014163	0.0011989	0.000874208	0.00631676	0.00242551	0.00248386
ADX17118	0.00131078	0.00117695	0.000834361	0.0048636	0.00216944	0.00172649
ADX17119	0.000433754	0.000264453	0.000306779	0.00154982	0.000642023	0.000557852
ADX17120	0.000959129	0.00105762	0.00092114	0.00466184	0.00176608	0.00154472
ADX17121	0.00013876	0.000191681	0.000163064	0.00321241	0.00103411	0.0010736
ADX17122	0.000113907	7.58e-05	4.83e-05	0.000313073	0.000398509	0.000363714
ADX17123	0.00155315	0.00193691	0.000741479	0.00680343	0.00446718	0.003642
ADX17124	0.00190762	0.00167249	0.00132467	0.0123451	0.00317361	0.00419923
ADX17125	0.00270942	0.0026412	0.00281737	0.0107439	0.00689638	0.00609231
ADX17126	0.00262952	0.00252017	0.00282075	0.0017914	0.00196983	0.00197519
ADX17127	0.0273931	0.0262305	0.0247094	0.0777488	0.0531784	0.053404
ADX17128	0.00460729	0.00602657	0.00521372	0.0135073	0.00380239	0.00359613
ADX17129	0.000957172	0.00101722	0.0010861	0.0023677	0.00129357	0.00116273
ADX17130	0.0229695	0.0216863	0.0232985	0.064887	0.0231883	0.0241795
ADX17131	0.0204693	0.0197911	0.0182588	0.0289077	0.0715833	0.0711504
ADX17132	0.0113984	0.00964613	0.0112926	0.0194919	0.00798512	0.00800145
ADX17133	0.0439581	0.0434524	0.0407131	0.0542613	0.0263786	0.026842
ADX17134	0.00415295	0.0046843	0.00405157	0.00405974	0.00201636	0.00195948
ADX17135	0.0270439	0.0282707	0.0242786	0.152006	0.0350563	0.0362959
ADX17136	0.00163296	0.00233577	0.00210393	0.00194668	0.00177902	0.00169618
ADX17137	0.00170464	0.0018732	0.00188708	0.00515371	0.00195468	0.0019524
ADX17138	0.0020023	0.00221959	0.00297393	0.0369639	0.0110466	0.00932387
ADX17139	0.00180003	0.00208938	0.00187293	0.00386038	0.00134847	0.00127802
ADX17140	0.00105406	0.000801218	0.000942522	0.00557686	0.00286706	0.00293496
ADX17141	0.0110973	0.00910941	0.00876278	0.0243814	0.0141764	0.0114378
ADX17142	0.00147223	0.00122932	0.00107974	0.00316676	0.00100774	0.000855879
ADX17143	0.000572256	0.000812465	0.000560405	0.00105259	0.000319857	0.000368966
ADX17144	0.0173469	0.0186501	0.0177631	0.0211218	0.0594783	0.060486
ADX17145	0.0286259	0.0276595	0.0299374	0.0640038	0.0327442	0.035292
ADX17146	0.00105488	0.000963236	0.00111533	0.00265364	0.00128472	0.00125599
ADX17147	0.00107089	0.00110701	0.000886986	0.00624485	0.00126043	0.00149343
ADX17148	0.00629865	0.0065819	0.006014	0.00620091	0.00436193	0.00385771
ADX17149	0.0222664	0.023068	0.0235669	0.013324	0.0156363	0.0160294
ADX17150	0.0047582	0.00454365	0.00478114	0.00219988	0.00252446	0.00218404
ADX17151	0.0194327	0.0179005	0.0210905	0.164486	0.0351733	0.0358299
ADX17152	0.171557	0.18574	0.160866	0.176187	0.132452	0.13526
ADX17153	0.00300037	0.00271791	0.00283548	0.0131893	0.00264529	0.00224816
ADX17154	0.00102357	0.00103462	0.00115735	0.00048307	0.000326206	0.000338661
ADX17155	0.00652511	0.00515784	0.00555928	0.00939478	0.0018641	0.00220373
ADX17156	0.0134173	0.0123006	0.012003	0.0142027	0.00365964	0.00412503
ADX17157	0.176638	0.1752	0.175096	0.0882364	0.0625823	0.0599613
ADX17158	0.00330246	0.00326425	0.00334786	0.00380721	0.00212314	0.00179412
ADX17159	0.0125824	0.0126646	0.0118892	0.0114353	0.00492122	0.00531224
ADX17160	0.00491299	0.00462539	0.00468656	0.0105554	0.00198886	0.00202171
ADX17161	0.00615169	0.00602726	0.00575955	0.0110318	0.004343	0.00398583
ADX17162	0.00359448	0.00363456	0.00344234	0.00989275	0.00397395	0.00405847
ADX17163	0.00654486	0.00570498	0.00706512	0.00577209	0.00362256	0.00300278
ADX17164	0.0194414	0.0202351	0.0214126	0.0221488	0.0194505	0.0199029
ADX17165	0.00503687	0.00471746	0.00573183	0.00779773	0.00489646	0.00426695
ADX17166	0.0548492	0.0530032	0.0507536	0.0849137	0.109074	0.101041
ADX17167	0.014388	0.0156594	0.0157638	0.061475	0.0499851	0.0474038
ADX17168	0.000947343	0.000930593	0.00115038	0.00466274	0.00183563	0.00139613
ADX17169	0.00727369	0.00920364	0.00903411	0.0238437	0.00716154	0.00793065
ADX17170	0.000398406	0.000473915	0.000429171	0.00200893	0.000185571	0.000281339
ADX17171	0.000829621	0.000919651	0.000968157	0.0135482	0.00193498	0.0019132
ADX17172	0.0190993	0.0186926	0.0183428	0.0518266	0.0178321	0.0173417
ADX17173	0.000738569	0.000753592	0.000705191	0.00359855	0.000704705	0.000616376
ADX17174	0.000732571	0.000911902	0.00093262	0.00270433	0.000477498	0.000439934
ADX17175	0.0126053	0.0121942	0.0123304	0.025154	0.0133796	0.01302
ADX17176	0.0125883	0.0123679	0.0129253	0.00986071	0.0139635	0.0128888
ADX17177	0.00618071	0.00556583	0.00564352	0.0034357	0.00573761	0.00558064
ADX17178	0.0019676	0.00186647	0.00172469	0.0144685	0.0032292	0.00301262
ADX17179	0.00883353	0.00949084	0.00667331	0.0798802	0.0105802	0.00875631
ADX17180	0.00137338	0.00111327	0.00109276	0.00173401	0.00129938	0.00130189
ADX17181	0.00460729	0.00367723	0.00625646	0.00392556	0.00632353	0.00429083
ADX17182	0.00175263	0.00155112	0.00165543	0.0800878	0.00686957	0.00771744
ADX17183	9.68e-05	0.000257445	0.000205321	0.00130323	0.000312504	0.000334735
ADX17184	0.000117177	0.000102291	7.46e-05	0.000368356	8.28e-05	0.000175385
ADX17185	0.00215543	0.0028672	0.00313603	0.0217925	0.00464054	0.003728
ADX17186	0.000261892	0.000357543	0.000368505	0.00386424	0.000712221	0.000825239
ADX17187	0.00234511	0.00230573	0.00244466	0.00807092	0.00587211	0.00613159
ADX17188	0.0042519	0.00220583	0.0032478	0.0734836	0.0286982	0.0277643
ADX17189	0.00284069	0.00365279	0.00281277	0.0162398	0.00412821	0.0043841
ADX17190	0.00163936	0.00233151	0.00297513	0.0170261	0.00501259	0.00431577
ADX17191	0.000679314	0.000597996	0.000712204	0.00843485	0.00119368	0.00121215
ADX17192	0.000141535	0.000155326	0.000144148	0.00130707	0.000365662	0.00047453
ADX17193	0.00021035	0.000209859	0.000223159	0.00176334	0.00101896	0.0012034
ADX17194	0.00435329	0.00325735	0.00390465	0.00509872	0.00483266	0.00481776
ADX17195	0.00293989	0.00283842	0.00295794	0.0276814	0.0042494	0.00435298
ADX17196	2.63e-05	7.88e-05	6.7e-05	0.00019529	0.000127479	0.000231081
ADX17197	0.000746706	0.00062577	0.000570368	0.00595992	0.00224263	0.00212202
ADX17198	0.00516873	0.0046792	0.00426494	0.110414	0.0183149	0.0180323
ADX17199	0.00376103	0.00332747	0.00343296	0.0353414	0.00779176	0.00713758
ADX17200	0.017094	0.0159779	0.0151066	0.0414635	0.0239172	0.0226544
ADX17201	0.0146445	0.0141992	0.0142712	0.00838232	0.00929451	0.00868544
ADX17202	0.00946343	0.00970362	0.00917918	0.038334	0.00703399	0.00677495
ADX17203	0.000396928	0.000274156	0.000272096	0.00110774	0.000517671	0.000584965
ADX17204	0.000364592	0.000323326	0.000412581	0.00167013	0.00101389	0.000905467
ADX17205	0.00139804	0.00133899	0.00135266	0.00336604	0.00284438	0.00272308
ADX17206	3.88e-05	9.67e-06	1.23e-05	0.00026376	9.39e-05	6.19e-05
ADX17207	0.00105981	0.000915304	0.00122839	0.00828211	0.00136647	0.00131321
ADX17208	0.00152843	0.00136149	0.00111189	0.147991	0.0136179	0.015992
ADX17209	0.00676803	0.00636797	0.0058142	0.013838	0.00537537	0.0044803
ADX17210	0.00531488	0.00579031	0.00557539	0.0254002	0.00899395	0.00914728
ADX17211	0.00394408	0.00469647	0.0034419	0.011697	0.0049305	0.00523048
ADX17212	0.00085102	0.00061748	9.85e-05	0.00644294	0.0216742	0.0188363
ADX17213	0.00021134	0.000210847	0.000134526	0.00289707	0.00228213	0.00246733
ADX17214	0.000252864	0.000426925	0.000198102	0.00580587	0.00350198	0.00343151
ADX17215	0.0113727	0.0102656	0.0113758	0.0283553	0.0133355	0.0164278
ADX17216	0.0132496	0.0135	0.0143556	0.0425376	0.0134284	0.0150775
ADX17217	0.0127266	0.0151283	0.0144784	0.0149591	0.00743292	0.00994312
ADX17218	0.0112763	0.0120937	0.00969001	0.0188281	0.00568999	0.00517587
ADX17219	0.000929287	0.00071777	0.000782342	0.000580861	0.000387234	0.000239297
ADX17220	0.00282523	0.00326706	0.00314714	0.0142949	0.0052877	0.00589452
ADX17221	0.00139824	0.00180632	0.00130082	0.00339962	0.000911786	0.000858594
ADX17222	0.000478189	0.000528189	0.000456579	0.00111246	0.000496375	0.000490788
ADX17223	0.000905308	0.000881168	0.000787092	0.00229403	0.00105179	0.000881318
ADX17224	0.00222858	0.00228347	0.00268379	0.00225144	0.000859105	0.000849436
ADX17225	0.00122305	0.00169767	0.00128625	0.00622618	0.00150263	0.00110367
ADX17226	0.0121137	0.0130043	0.0128965	0.0196263	0.00217336	0.00262957
ADX17227	0.000915702	0.000769319	0.000644236	0.00182799	0.000544747	0.000557852
ADX17228	0.00314322	0.00485176	0.00309555	0.0167729	0.0038305	0.0042608
ADX17229	0.000190843	0.000222131	0.000242958	0.000576983	0.000436555	0.000355469
ADX17230	0.000505632	0.000655788	0.00122305	0.00300181	0.00265346	0.00250251
ADX17231	0.000881698	0.000786063	0.000955294	0.00499621	0.00304427	0.00332449
ADX17232	0.000652763	0.00102827	0.000699804	0.0050424	0.00280149	0.00257798
ADX17233	0.00120548	0.000515428	0.000876951	0.00404689	0.00305879	0.00309309
ADX17234	0.000666068	0.000687429	0.000584797	0.00284072	0.00352322	0.00333689
ADX17235	0.000868988	0.000866961	0.000854859	0.0334485	0.00688828	0.00785127
ADX17236	0.000201856	0.000251731	0.000244129	0.00203889	0.000790404	0.0011924
ADX17237	0.000551229	0.000458286	0.000380118	0.00876834	0.00283712	0.00304354
ADX17238	0.0001744	0.00026099	0	0.00280412	0.000704016	0.000487264
ADX17239	0.00327397	0.0025664	0.00315578	0.0218663	0.00309639	0.00347223
ADX17240	0.0115014	0.0100238	0.00959318	0.039351	0.011456	0.0118547
ADX17241	0.00115655	0.001337	0.00102833	0.00437458	0.00174892	0.00180251
ADX17242	0.00137612	0.00137291	0.00191117	0.0106247	0.00333306	0.00294601
ADX17243	0.000376449	0.000250381	0.000599061	0.0102173	0.00326723	0.00310525
ADX17244	0.000528082	0.000319303	0.000488938	0.00308759	0.000426351	0.000485424
ADX17245	0.000598233	0.000740078	0.000426494	0.0047946	0.00113985	0.00105061
ADX17246	0.00323145	0.00335965	0.00290137	0.00429122	0.00400952	0.00456176
ADX17247	0.00101187	0.00114593	0.000940028	0.00607711	0.00442693	0.00434435
ADX17248	0.00191208	0.00193996	0.00169158	0.00750891	0.00217169	0.00194029
ADX17249	0.00175459	0.00151314	0.00159011	0.00100536	0.00170469	0.00182795
ADX17250	0.0030205	0.00281476	0.00228184	0.0137664	0.00428768	0.00339154
ADX17251	0.000116706	0.000349302	7.43e-05	0.000561341	0.000298375	0.00038818
ADX17252	0.00047555	0.000400019	0.000391737	0.00159921	0.000519447	0.000588035
ADX17253	0.0118206	0.0129297	0.0112864	0.0290344	0.010837	0.0102602
ADX17254	0.0017356	0.00141351	0.00153316	0.00516942	0.00214476	0.00189442
ADX17255	0.00145165	0.00170383	0.00108709	0.0193976	0.00227505	0.00235169
ADX17256	0.00348952	0.00267798	0.00341725	0.0249364	0.00375638	0.00414265
ADX17257	0.00119969	0.00130737	0.00126883	0.0102268	0.00464916	0.00430216
ADX17258	0.000740111	0.000615321	0.000706664	0.00974717	0.00308726	0.00320021
ADX17259	0.000300227	0.00050375	0.000382212	0.00370202	0.00170775	0.0015578
ADX17260	0.000136625	0.000119268	4.35e-05	0.00104205	0.000799715	0.000927044
ADX17261	0.000275056	0.000424095	0.000318334	0.00141233	0.00175636	0.00175655
ADX17262	0.000176016	0.000248774	0.000149388	0.00974814	0.00435797	0.00487095
ADX17263	0.000376584	0.000486207	0.000282012	0.000876739	0.0011625	0.0012732
ADX17264	0.00023727	0.00028406	0.00024165	0.000599964	0.00215826	0.00229812
ADX17265	4.83e-05	4.81e-05	3.07e-05	0.000238713	0.000574602	0.000597023
ADX17266	0.00666599	0.00650548	0.00624334	0.0172531	0.00643768	0.00653921
ADX17267	0.00197065	0.0020784	0.00247295	0.00471219	0.00584131	0.00528116
ADX17268	0.00675735	0.00723189	0.00742955	0.107079	0.0227647	0.0222633
ADX17269	0.000476508	0.000490253	0.00054976	0.00176807	0.00226019	0.00190191
ADX17270	0.0032264	0.00354511	0.00374667	0.0227925	0.0240245	0.0227796
ADX17271	0.000282644	0.000322269	0.000154212	0.00339593	0.000619387	0.000526462
ADX17272	0.265395	0.266299	0.262933	0.0789013	0.190866	0.192707
ADX17273	0.00173152	0.00204518	0.002027	0.00160824	0.00104445	0.00120746
ADX17274	0.0105149	0.0116893	0.0124301	0.0580894	0.0135829	0.012111
ADX17275	0.014269	0.0153133	0.0178761	0.0737335	0.0151461	0.0146125
ADX17276	0.00150122	0.00187215	0.00111485	0.0116046	0.00474708	0.00414439
ADX17277	0.000777047	0.00117536	0.000765864	0.0111608	0.00291416	0.00248117
ADX17278	0.00242108	0.00207037	0.00220159	0.0185371	0.00614328	0.00607413
ADX17279	0.000507234	0.000433758	0.000553498	0.00250943	0.00187209	0.00121473
ADX17280	9.85e-05	0.000229399	0.000188181	0.00288452	0.00063648	0.000642427
ADX17281	0.00093854	0.000936351	0.00110741	0.00345411	0.00177421	0.0013705
ADX17282	0.000944619	0.000992903	0.000923405	0.00329635	0.00159338	0.00161585
ADX17283	0.0104788	0.0111804	0.00996819	0.0392413	0.030903	0.0316008
ADX17284	0.0030334	0.00340859	0.0026829	0.00695065	0.000992504	0.00110878
ADX17285	0.00032267	0.000214612	0.000182571	0.000532115	0.000130255	0.000171719
ADX17286	0.00957394	0.00917082	0.00907042	0.00201944	0.00184894	0.00203125
ADX17287	0.00152861	0.00152505	0.00162654	0.0137705	0.00432868	0.00413426
ADX17288	0.000927514	0.000549427	0.0010701	0.0036327	0.00238691	0.00242946
ADX17289	0.00395496	0.00364479	0.00337087	0.0169685	0.0107969	0.0109429
ADX17290	0.000648353	0.000910369	0.000489128	0.00350459	0.00153158	0.00174437
ADX17291	0.00243482	0.00199655	0.00140124	0.00635289	0.00228891	0.00226314
ADX17292	0.000523988	0.000674537	0.00062404	0.00149825	0.000409399	0.000505989
ADX17293	0.0055305	0.00547555	0.00596747	0.0288764	0.00388654	0.00399085
ADX17294	0.0616708	0.060727	0.0628604	0.0502996	0.0319888	0.0328555
ADX17295	0.0184326	0.0179898	0.0183283	0.0232698	0.0111612	0.0120866
ADX17296	0.0141482	0.0149585	0.012117	0.0100599	0.0121644	0.0111474
ADX17297	0.00640109	0.00632648	0.00753981	0.0367981	0.018595	0.018911
ADX17298	0.00921645	0.00812431	0.00795611	0.0166562	0.0136078	0.0134042
ADX17299	0.000745869	0.00091325	0.000733743	0.00662528	0.00216238	0.00208392
ADX17300	0.000323128	0.000443265	0.000385656	0.0124392	0.0196149	0.0196037
ADX17301	0.00273175	0.00327046	0.00278219	0.0464007	0.0172029	0.0206437
ADX17302	0.00047728	0.000350123	0.000375292	0.000567161	0.000521337	0.00059391
ADX17303	0.0420896	0.0398547	0.0394762	0.045531	0.0184943	0.0167251
ADX17304	0.00293989	0.00284324	0.00316984	0.0120462	0.00159851	0.00136499
ADX17305	0.00467832	0.0044246	0.00540503	0.0625896	0.00386441	0.003346
ADX17306	0.00250941	0.00333808	0.00319468	0.0381584	0.0075751	0.00795644
ADX17307	0.0137949	0.0136499	0.0154027	0.0554741	0.021727	0.0206701
ADX17308	0.00382687	0.00459712	0.00432506	0.00730903	0.00624236	0.00498756
ADX17309	0.00152244	0.00162364	0.00153718	0.0115144	0.00478946	0.0038555
ADX17310	0.00253716	0.00346874	0.0023926	0.0309928	0.00766252	0.00757628
ADX17311	0.000468103	0.000449715	0.000375216	0.00448873	0.00146971	0.00123174
ADX17312	0.000136891	4.55e-05	0.000348544	0.00129804	0.000294719	0.000309614
ADX17313	0.000720673	0.000878768	0.000917472	0.00950767	0.0029092	0.00294038
ADX17314	0.000591048	0.000964913	0.00123128	0.00301269	0.00420792	0.0050613
ADX17315	0.00123286	0.000851525	0.00108659	0.0117685	0.00153132	0.00215756
ADX17316	0.000185677	0.000246992	0.000236381	0.00196478	0.000849477	0.000765806
ADX17317	0.000397749	0.000379569	0.000550398	0.00909742	0.00113092	0.0011458
ADX17318	0.000826	0.00103598	0.000570848	0.00293836	0.00142902	0.00160133
ADX17319	0.000533755	0.000414174	0.000226504	0.00589253	0.00079004	0.000781147
ADX17320	0.000511147	0.000288235	0.000480974	0.00122775	0.000251195	0.000230627
ADX17321	0.025681	0.023791	0.0252502	0.0299667	0.0201784	0.0216901
ADX17322	0.00234694	0.00190786	0.00226854	0.00915621	0.00764946	0.0073552
ADX17323	0.00174657	0.00151522	0.00183683	0.0273939	0.0193737	0.0190344
ADX17324	0.00526877	0.00519464	0.00599734	0.26429	0.0864769	0.0819904
ADX17325	0.00533808	0.00631729	0.00620994	0.0204442	0.040883	0.0395706
ADX17326	0.00724195	0.00722506	0.00630003	0.0343352	0.00833175	0.00684089
ADX17327	0.00162406	0.00187489	0.00138822	0.00313736	0.00110515	0.00112976
ADX17328	7.76e-05	3.87e-05	7.41e-05	0.000783656	0.00117447	0.00125415
ADX17329	0.00015058	0.000100152	0.000191699	0.00235904	0.000972572	0.00100169
ADX17330	0.00185832	0.00144199	0.00175244	0.012088	0.00283396	0.00269218
ADX17331	0.0006431	0.0006416	0.000732536	0.00206525	0.000409904	0.000702503
ADX17332	0.000997108	0.00096715	0.000846264	0.00239798	0.0030412	0.00276376
ADX17333	0.000137042	0.000136723	0.00024716	0.00176089	0.000654633	0.00048317
ADX17334	0.000111945	3.72e-05	0.000118762	0.000446136	0.000135569	0.000104256
ADX17335	0.000406169	0.000675369	0.000344723	0.0154057	0.00131169	0.00151308
ADX17336	0.00049043	0.000771567	0.000624356	0.00648568	0.00202545	0.00161116
ADX17337	0.00759688	0.00879909	0.00775038	0.00394717	0.0070576	0.00677048
ADX17338	0.00279074	0.00292444	0.00270935	0.00569481	0.00251248	0.00242009
ADX17339	0.00204832	0.00209144	0.00207799	0.00215076	0.00144701	0.00141795
ADX17340	0.00773704	0.0074419	0.00789672	0.0148093	0.00716485	0.00654577
ADX17341	0.00194018	0.00160478	0.00124556	0.00263894	0.00137899	0.00146937
ADX17342	0.00103231	0.000668769	0.000682708	0.00292942	0.0010824	0.00123075
ADX17343	0.000716899	0.00117802	0.000805295	0.00361625	0.00129377	0.00117822
ADX17344	0.000476812	0.000323476	0.000364211	0.000644773	0.000369559	0.000228375
ADX17345	0.0153563	0.0152759	0.0156284	0.0414459	0.010596	0.0100135
ADX17346	0.0424627	0.0454723	0.0423426	0.0213302	0.0156202	0.0166013
ADX17347	0.0117833	0.0115902	0.0115149	0.0203212	0.0109202	0.0103998
ADX17348	0.00365715	0.00303021	0.00489257	0.00413992	0.00465414	0.00430487
ADX17349	0.000354432	0.000596709	0.000479421	0.00798197	0.000608076	0.000654281
ADX17350	0.0140992	0.0148478	0.0145952	0.04157	0.0181095	0.0163709
ADX17351	0.00252678	0.00236683	0.00266278	0.0304878	0.0254888	0.0263898
ADX17352	0.00441421	0.00411847	0.00405862	0.0240289	0.00651721	0.00574238
ADX17353	0.00314858	0.00290069	0.00290698	0.00300546	0.00167178	0.00163032
ADX17354	0.00178056	0.0016056	0.00150393	0.00522326	0.00269541	0.00259674
ADX17355	0.000852921	0.000939983	0.000833315	0.00492292	0.000784698	0.000823368
ADX17356	0.00100128	0.00119386	0.00102599	0.00489322	0.00151163	0.00125418
ADX17357	0.00106126	0.00117387	0.00120421	0.0018167	0.000903382	0.00104976
ADX17358	0.00159915	0.00170004	0.00166872	0.0077169	0.00389442	0.00345297
ADX17359	0.105586	0.109833	0.109813	0.183714	0.0569144	0.0604682
ADX17360	0.0220594	0.021865	0.0230988	0.0820081	0.0637606	0.0632336
ADX17361	0.0352239	0.0366697	0.0380189	0.0955763	0.0698593	0.0713653
ADX17362	0.0164058	0.0196698	0.0163056	0.0684675	0.0156853	0.0164278
ADX17363	0.00952172	0.00750768	0.0082116	0.031911	0.0152509	0.0134855
ADX17364	0.000356247	0.000367263	0.000483765	0.000656026	0.000316381	0.000492928
ADX17365	0.000142628	0.000121968	5.19e-05	0.00146165	0.000345456	0.000260242
ADX17366	0.000125483	0.000250381	0.000239624	0.00266427	0.000303929	0.000400677
ADX17367	0.000209517	0.000371606	0.000296368	0.00205389	0.000469875	0.000427419
ADX17368	2.7e-05	5.39e-05	2.58e-05	0.00186559	0.000103604	0.000129395
ADX17369	0.00022296	0.000200196	8.52e-05	0.00224286	0.000666031	0.000516149
ADX17370	0.00575007	0.00543473	0.00488822	0.0232382	0.0219443	0.0220899
ADX17371	0.00159021	0.00167983	0.00107177	0.0099883	0.0019258	0.00138143
ADX17372	0.000387504	0.000276143	0.000458085	0.00150629	0.00030168	0.000309333
ADX17373	0.00141359	0.0013447	0.00142294	0.00485203	0.00140668	0.00183697
ADX17374	0.00197193	0.00181941	0.00147227	0.00451109	0.00326789	0.00323111
ADX17375	0.000115552	0.00015371	0.000119086	0.000780372	0.000213238	0.000149343
ADX17376	0.000573126	0.000531897	0.000627824	0.000769299	0.000903913	0.000978856
ADX17377	0.00663272	0.007149	0.0071246	0.0530053	0.0150609	0.0152695
ADX17378	0.00317767	0.003442	0.00242725	0.0112292	0.00434916	0.00306813
ADX17379	0.00115225	0.00114956	0.000968157	0.00486444	0.00213964	0.0019132
ADX17380	0.0461997	0.0454602	0.0448017	0.028957	0.0286089	0.0290645
ADX17381	0.0096058	0.00922605	0.00953442	0.010847	0.0090172	0.00805792
ADX17382	0.00213649	0.00185647	0.00175478	0.0020685	0.00156911	0.00140841
ADX17383	0.0138747	0.0143068	0.0120918	0.0158936	0.0133069	0.0128597
ADX17384	0.00139652	0.00145131	0.00172849	0.0133541	0.00772015	0.00730811
ADX17385	0.000114065	0.000132765	0.000145213	0.00105025	0.000245576	0.000151758
ADX17386	0.000557031	0.00030874	0.000590953	0.00331716	0.000824493	0.000691695
ADX17387	0.000423124	0.000249445	0.00029382	0.000285452	0.000543474	0.000675534
ADX17388	0.00711281	0.00781382	0.00686768	0.0578907	0.00864613	0.00953767
ADX17389	0.00247501	0.00246923	0.00221728	0.00903225	0.00288631	0.00256112
ADX17390	0.0286166	0.030929	0.0315961	0.0694035	0.0170426	0.0178379
ADX17391	0.00179425	0.00164997	0.00198627	0.00142798	0.00113368	0.00120811
ADX17392	0.00103137	0.000953504	0.000884093	0.00140034	0.000671696	0.00069158
ADX17393	0.00175653	0.00169497	0.00151524	0.00125048	0.000751695	0.000827518
ADX17394	0.00805954	0.00585491	0.00836772	0.00722615	0.00259014	0.00374778
ADX17395	0.000669358	0.000653589	0.000688968	0.00266565	0.000666891	0.000795809
ADX17396	0.000130065	0.000273942	0.000257574	0.00361058	0.0011551	0.00110749
ADX17397	2.67e-05	2.67e-05	6.8e-05	0.000308519	0.000172621	0.000149343
ADX17398	0.00211997	0.00190868	0.00157983	0.0188871	0.0019203	0.00148593
ADX17399	0.0317673	0.0327603	0.0317002	0.00952496	0.0172193	0.0163595
ADX17400	0.0089206	0.00863544	0.00832069	0.0959852	0.0119798	0.0111399
ADX17401	0.00987048	0.00933522	0.00995132	0.00449269	0.0041114	0.00422404
ADX17402	0.00353225	0.00317927	0.00293271	0.0098139	0.00632353	0.00606847
ADX17403	0.00172949	0.0016906	0.00164577	0.0120854	0.00277853	0.00253808
ADX17404	0.00480592	0.00525574	0.00474561	0.00787462	0.00559629	0.00479553
ADX17405	0.00145021	0.00124014	0.00114291	0.0183351	0.00906007	0.0100055
ADX17406	0.00209246	0.00180383	0.00183625	0.00127306	0.000623259	0.000405424
ADX17407	0.00340187	0.00337298	0.00387637	0.00526371	0.00144108	0.00160925
ADX17408	0.0142031	0.0149318	0.0136098	0.0185111	0.0137172	0.0144467
ADX17409	0.00224567	0.00288318	0.00199187	0.00197309	0.00251154	0.00235102
ADX17410	0.00380825	0.00387243	0.00382262	0.0912437	0.00875084	0.00976312
ADX17411	0.00434154	0.00484743	0.00472898	0.00152497	0.00258143	0.00238972
ADX17412	0.00449372	0.00450871	0.00435565	0.0160422	0.017563	0.0175284
ADX17413	0.00193077	0.00178532	0.00209831	0.00190265	0.00140674	0.00135332
ADX17414	0.00115039	0.000765138	0.00142385	0.000843157	0.00134157	0.00102036
ADX17415	0.00325342	0.0035292	0.00381314	0.0167982	0.00685854	0.00706992
ADX17416	0.0471862	0.0456197	0.0473619	0.0333158	0.035967	0.0359757
ADX17417	0.00650679	0.0065768	0.0061312	0.0458221	0.010093	0.0093386
ADX17418	0.00873274	0.00856955	0.00897598	0.0158471	0.00835073	0.00808532
ADX17419	0.00116885	0.00124056	0.00120309	0.00201982	0.00164642	0.0015584
ADX17420	0.00154208	0.00189247	0.0017547	0.00420838	0.00263324	0.00285416
ADX17421	0.00574624	0.00631377	0.00630101	0.00142773	0.00211551	0.00227518
ADX17422	0.00307028	0.00295964	0.00343333	0.00289081	0.00217734	0.00233499
ADX17423	0.00234286	0.00245111	0.0021604	0.00852082	0.00276061	0.00251724
ADX17424	0.000404958	0.000238735	0.000351506	0.000242841	0.000237779	0.000205714
ADX17425	0.0011225	0.000746589	0.000762151	0.00573845	0.00151043	0.00173238
ADX17426	0.00252261	0.00198689	0.00152123	0.0264928	0.00450207	0.00264964
ADX17427	0.00126464	0.00100362	0.00102454	0.00180113	0.00148512	0.0016749
ADX17428	0.000587498	0.000519141	0.000512866	0.00283732	0.00107061	0.000937964
ADX17429	0.00161523	0.00226798	0.00236095	0.013565	0.00280133	0.00296082
ADX17430	0	0.000242813	0.000103281	0.00506158	0.00914795	0.0104266
ADX17431	6.36e-05	0.000190398	0	0.00236039	0.00526434	0.00573829
ADX17432	0	2.81e-05	3.58e-05	0.00280875	0.00240926	0.00280912
ADX17433	0.00121054	0.00123791	0.00115584	0.0364574	0.0206463	0.0200999
ADX17434	0.000610738	0.000755019	0.000676101	0.259312	0.0763744	0.0770197
ADX17435	0.00103293	0.00202141	0.00187135	0.00406197	0.00439425	0.00463022
ADX17436	0.0975138	0.0906532	0.0959284	0.686051	0.099433	0.096292
ADX17437	0.00741724	0.00964894	0.00749863	0.00953356	0.00698642	0.00577584
ADX17438	0.00704838	0.00713459	0.00638599	0.0196835	0.00544134	0.0054417
ADX17439	0.00175097	0.00182581	0.00185313	0.000308756	0.000195869	0.000193664
ADX17440	0.00632683	0.00651569	0.00580274	0.0139394	0.00952947	0.00963943
ADX17441	0.0348792	0.03745	0.0353014	0.132876	0.0311943	0.0278431
ADX17442	0.00547929	0.00489444	0.0064889	0.0130285	0.00632699	0.00600148
ADX17443	0.0277981	0.0271958	0.0271591	0.0279848	0.014962	0.0153957
ADX17444	0.000936838	0.00095023	0.000924317	0.00227234	0.00110933	0.00105945
ADX17445	0.00574303	0.00525217	0.00577489	0.0194907	0.0110877	0.0109629
ADX17446	0.00318042	0.00279971	0.0034535	0.0151946	0.0130653	0.015345
ADX17447	0.00518348	0.00424517	0.00443215	0.0295993	0.0204874	0.0225419
ADX17448	0.00406078	0.00405131	0.00385536	0.0255379	0.0339519	0.0313721
ADX17449	0.0013373	0.00123514	0.00128616	0.00894171	0.0108864	0.0111927
ADX17450	0.0104611	0.00821248	0.008078	0.00890849	0.00623054	0.00657111
ADX17451	0.0201524	0.0207677	0.0190153	0.0376905	0.0439105	0.0431891
ADX17452	0.0150995	0.0155503	0.0137971	0.0214868	0.00968376	0.00942895
ADX17453	0.184971	0.1897	0.184429	0.181264	0.249204	0.256589
ADX17454	0.00741931	0.00726742	0.00786159	0.00636475	0.00630466	0.00701141
ADX17455	0.0376406	0.035798	0.034708	0.0846977	0.0399039	0.0387527
ADX17456	0.00475227	0.00457409	0.00495727	0.00807862	0.00686226	0.00663461
ADX17457	0.0044404	0.00457238	0.00429081	0.0355104	0.00315306	0.00338805
ADX17458	0.0110389	0.0110132	0.0110752	0.0132011	0.0115979	0.0111464
ADX17459	0.00315681	0.00318931	0.00284882	0.0247774	0.00561354	0.0067625
ADX17460	0.000246294	0.000245719	0.000139356	0.00187286	0.000596541	0.000349527
ADX17461	0.000152117	0.000173442	0.000221321	0.00292067	0.00071933	0.000572456
ADX17462	0.000162041	8.08e-05	0.000103145	0.00180374	0.00150449	0.00116417
ADX17463	0.000119763	0.000159311	0.000152467	0.000740625	0.000596262	0.000525816
ADX17464	0.00109391	0.00112546	0.00126207	0.0155028	0.00295312	0.00322006
ADX17465	0.000659975	0.000598577	0.00045829	0.132236	0.0157429	0.0165714
ADX17466	0.00506167	0.00527103	0.00470358	0.0137089	0.00429538	0.00492538
ADX17467	0.000694238	0.000593673	0.000852254	0.00216707	0.00138123	0.00174174
ADX17468	0.00151592	0.00120163	0.00138794	0.01214	0.00194482	0.00181518
ADX17469	0.00472469	0.00464078	0.00496074	0.0105426	0.00444371	0.00396599
ADX17470	0.000858621	0.000911884	0.00109309	0.0251445	0.0125226	0.0122932
ADX17471	0.00358141	0.00370265	0.00377983	0.0126078	0.00323606	0.00284412
ADX17472	0.0352439	0.0347576	0.0387827	0.0132274	0.0258379	0.0276814
ADX17473	0.0140915	0.0131887	0.0125222	0.0113028	0.00881428	0.00849232
ADX17474	0.0020204	0.00244762	0.00224142	0.0109712	0.00107192	0.00168195
ADX17475	0.0034575	0.00290603	0.00325602	0.0031633	0.00173987	0.00155015
ADX17476	0.00682184	0.00583041	0.00726622	0.0105561	0.0041491	0.00422947
ADX17477	0.0131292	0.013034	0.0129483	0.0116803	0.00890887	0.00942916
ADX17478	0.000650675	0.000827358	0.000665937	0.00438678	0.000793142	0.000743476
ADX17479	0.00180916	0.00157932	0.00169141	0.00389251	0.00276152	0.00329458
ADX17480	0.0165913	0.0174037	0.0156379	0.246369	0.0106059	0.0105717
ADX17481	0.0158614	0.0169606	0.0156365	0.00355468	0.00797903	0.00814895
ADX17482	0.0165462	0.0170139	0.0156071	0.00515333	0.00682489	0.00702524
ADX17483	0.00302578	0.0035025	0.00330882	0.00609332	0.00355472	0.00402565
ADX17484	0.000161348	0.000190239	0.000242756	0.00558765	0.0119371	0.0121891
ADX17485	0.0100274	0.00915404	0.0105129	0.0171847	0.0106885	0.0100973
ADX17486	0.0492431	0.0544444	0.0521639	0.129764	0.0372349	0.0384292
ADX17487	0.000974503	0.00102942	0.00109466	0.000283597	0.000370246	0.000411838
ADX17488	0.0202117	0.0154901	0.0140351	0.0128022	0.0123127	0.0126142
ADX17489	0.000246458	9.22e-05	0.00031376	0.00165113	0.000198979	0.000172147
ADX17490	0.00039297	0.000268247	0.000210645	0.00257513	0.000283871	0.000346717
ADX17491	8.61e-05	9.82e-05	0.000109619	0.000456416	8.94e-05	6.87e-05
ADX17492	2.13e-05	0	0	0.000246176	3.44e-05	1.7e-05
ADX17493	0	2.31e-05	0	0.000209724	5.6e-05	5.54e-05
ADX17494	8.3e-05	8.28e-05	0	0.000393424	6.7e-05	8.28e-05
ADX17495	0.000280858	0.000305676	0.000162524	0.00153685	0.000123683	0.000264964
ADX17496	0.000494832	0.000609838	0.000741129	0.00285609	0.000493508	0.000650605
ADX17497	0.000204478	0.000174858	0.000130158	0.00441977	0.000400924	0.000338116
ADX17498	0.0656465	0.0688197	0.0619114	0.185422	0.208659	0.204383
ADX17499	0.000481787	0.00109866	0.000700975	0.00663987	0.00166703	0.00148344
ADX17500	0.00211538	0.00164145	0.00182861	0.0177868	0.0134099	0.0130296
ADX17501	0.000145308	0.000126848	9.25e-05	0.0157105	0.00227298	0.0021314
ADX17502	0.00371362	0.00330155	0.00303441	0.00947571	0.00503426	0.00473126
ADX17503	0.0013747	0.0015468	0.00134219	0.000732946	0.000884564	0.000849854
ADX17504	0.00698916	0.00474542	0.00457245	0.0303353	0.00869924	0.00906627
ADX17505	0.0124241	0.0141152	0.0116711	0.0467538	0.017852	0.0176293
ADX17506	0.0133104	0.013091	0.0138205	0.0265425	0.030562	0.0284095
ADX17507	0.0069439	0.00711664	0.00819721	0.0447116	0.0390906	0.0367357
ADX17508	0.00178707	0.00234006	0.00170631	0.0706601	0.0132557	0.0136415
ADX17509	0.00441863	0.00474202	0.00517703	0.0330226	0.00888301	0.00903597
ADX17510	0.0217819	0.0205312	0.0216907	0.0561394	0.0152122	0.015041
ADX17511	0.0175354	0.0189188	0.0182432	0.0237871	0.00869883	0.00903097
ADX17512	0.00132544	0.00076557	0.00119893	0.000977848	0.000366088	0.000612561
ADX17513	0.00227718	0.00215674	0.00225262	0.00335565	0.00511176	0.0050051
ADX17514	0.00156051	0.00272452	0.00186248	0.0258147	0.0121264	0.0128464
ADX17515	0.0254214	0.0252413	0.0255825	0.0352347	0.0128031	0.0119826
ADX17516	0.0252417	0.0243808	0.028041	0.056606	0.0364746	0.0322138
ADX17517	0.0031059	0.00288786	0.00255534	0.0168292	0.0040087	0.00386238
ADX17518	0.00393041	0.00378685	0.00372253	0.00455413	0.00632731	0.00625609
ADX17519	0.0900238	0.0871963	0.0816237	0.0740261	0.121731	0.125074
ADX17520	0.00806642	0.00855794	0.00778955	0.0050127	0.0131838	0.0127684
ADX17521	0.00178479	0.00175365	0.00137708	0.00118178	0.00122264	0.00148951
ADX17522	0	0	0	0	0	0
ADX17523	0.0041864	0.00396546	0.00467089	0.0258116	0.00784217	0.00814817
ADX17524	0.00763422	0.00811314	0.00714132	0.00550109	0.00318897	0.00280862
ADX17525	0.008526	0.00878577	0.00880236	0.0064908	0.00207449	0.00257325
ADX17526	0.132829	0.137652	0.130995	0.217506	0.0555084	0.0608574
ADX17527	0.0123138	0.0125569	0.0119597	0.0241796	0.00743789	0.00763384
ADX17528	0.00229661	0.00256157	0.00221746	0.00398947	0.00227086	0.0022556
ADX17529	0.0031672	0.00279696	0.00227649	0.00704732	0.00379277	0.00343556
ADX17530	0.000965998	0.00063676	0.00101019	0.000611607	0.000891321	0.000936369
ADX17531	0.0255836	0.0243522	0.0249312	0.0169054	0.0176455	0.0174061
ADX17532	0.00644514	0.00586606	0.0051822	0.082978	0.017619	0.0141712
ADX17533	0.00376399	0.00359194	0.00364597	0.00553249	0.00366648	0.00414777
ADX17534	0.00325363	0.00292144	0.00310659	0.0273643	0.00495816	0.00474003
ADX17535	0.00876609	0.00893271	0.00922035	0.0233076	0.0434671	0.0454102
ADX17536	0.00632976	0.00589599	0.00599596	0.0157812	0.0203446	0.0204269
ADX17537	0.0137534	0.013823	0.0139425	0.0350291	0.0581106	0.0611162
ADX17538	0.000470857	0.000635556	0.00070522	0.00146162	0.00120753	0.000884402
ADX17539	0.00366531	0.0039234	0.0036941	0.00314815	0.00246601	0.0023773
ADX17540	0.00708212	0.0067072	0.00614139	0.00465471	0.0017402	0.00213028
ADX17541	0.00203531	0.00211517	0.00205129	0.00962638	0.00178015	0.00194064
ADX17542	0.206001	0.213289	0.20614	0.0547465	0.198648	0.202794
ADX17543	0.362438	0.366995	0.326108	1.33036	0.391431	0.406263
ADX17544	0.00124039	0.000956248	0.000879279	0.00297531	0.00172976	0.00173279
ADX17545	0.0287192	0.0290525	0.0287531	0.0348351	0.0209652	0.0218274
ADX17546	0.011225	0.0119602	0.0118459	0.0814125	0.0230142	0.0226177
ADX17547	0.00114784	0.00128831	0.000991593	0.0625335	0.0159859	0.0174422
ADX17548	0.0142644	0.0139865	0.0138409	0.0322689	0.011302	0.0121047
ADX17549	0.000951902	0.000836624	0.00109643	0.00370019	0.0010613	0.000976982
ADX17550	0.0128167	0.0128081	0.0130587	0.0104976	0.010296	0.0105717
ADX17551	0.0179303	0.018511	0.0184951	0.0132409	0.00960007	0.00965178
ADX17552	0.041063	0.0411259	0.0410193	0.0567804	0.0176933	0.017875
ADX17553	0.00481052	0.00513663	0.00510674	0.0100176	0.00420643	0.00442286
ADX17554	0.00375848	0.00470251	0.00431419	0.0298728	0.00703889	0.00831225
ADX17555	0.0130551	0.0138698	0.015732	0.0290478	0.018586	0.0192519
ADX17556	0.00473684	0.0045449	0.00473196	0.00299005	0.00153705	0.00161021
ADX17557	0.000609453	0.000405355	0.000362078	0.0353274	0.00434641	0.00385963
ADX17558	0.000523007	0.00056716	0.00063688	0.00727491	0.00240501	0.00214196
ADX17559	0.000610056	0.000608633	0.000517765	0.0051308	0.00229849	0.00240248
ADX17560	0.000226643	0.00015828	0.000144267	0.00222385	0.00107959	0.00128455
ADX17561	0.00482722	0.0035486	0.0051751	0.0404312	0.0637925	0.0592211
ADX17562	0.00293989	0.00366629	0.0040546	0.981751	0.615538	0.617997
ADX17563	0.00101626	0.0017743	0.00129377	0.0159211	0.00410241	0.00405624
ADX17564	0.0169043	0.0178426	0.0190254	0.0810046	0.0245266	0.021317
ADX17565	0.0018843	0.00185305	0.00155926	0.00924447	0.00331426	0.00318026
ADX17566	0.0043919	0.00225342	0.00463274	0.026384	0.0141833	0.0133225
ADX17567	0.000668748	0.000424574	0.000503081	0.018698	0.00107984	0.00106768
ADX17568	0.000318833	0.000144586	0.0001476	0.00179245	0.000655231	0.000786682
ADX17569	4.02e-05	5.35e-05	0	0.000420068	0.000119064	0.000117723
ADX17570	0.000164942	0.000197468	0.000209983	0.00212617	0.000563739	0.000579339
ADX17571	7.37e-05	0.000102876	0.000168783	0.00242928	0.000440048	0.000446854
ADX17572	9.17e-05	6.86e-05	0.000131286	0.000935348	0.000490302	0.000475637
ADX17573	3.17e-05	3.16e-05	0.000120918	0.00300213	0.00043454	0.000454923
ADX17574	0.00017342	0.000158598	0.000110389	0.0025143	0.00206518	0.00206501
ADX17575	0.00029149	0.00029081	0.000148436	0.000865252	0.000329471	0.000232688
ADX17576	0.000880822	0.00135809	0.000713589	0.0303057	0.0429269	0.0442974
ADX17577	0.000187084	0.000261306	0.000357258	0.00232932	0.000604174	0.000537636
ADX17578	0.000506046	0.000216371	0.000153389	0.00158956	0.000330739	0.000384725
ADX17579	2.54e-05	5.08e-05	0	0.000104874	2.05e-05	0.000121838
ADX17580	0.00444384	0.00496127	0.00343482	0.0150928	0.00145219	0.00135138
ADX17581	0.000444689	0.000419004	0.000534672	0.000224074	0.000638263	0.000670521
ADX17582	7.61e-05	5.69e-05	0.000121067	0.000768446	6.14e-05	0.000167011
ADX17583	4.92e-05	0	4.17e-05	0.0010808	7.94e-05	5.23e-05
ADX17584	0.00096465	0.0006416	0.000818716	0.00848427	0.00090862	0.00064171
ADX17585	0.000495487	0.000560242	0.000967216	0.00868855	0.000933414	0.00145028
ADX17586	0.000266006	0.00024126	0.000338647	0.000159516	0.000566191	0.000752859
ADX17587	0.0141633	0.0149757	0.0117125	0.0163697	0.00820965	0.00792398
ADX17588	0.00701612	0.00759548	0.00768321	0.00840514	0.00471756	0.0051241
ADX17589	0.00127017	0.000877298	0.000948448	0.00230611	0.00139032	0.00127717
ADX17590	0.0129545	0.0137367	0.0134764	0.0161751	0.00316756	0.00360465
ADX17591	0.00236932	0.00249886	0.00258542	0.0171639	0.0038531	0.00362059
ADX17592	0.00324438	0.00304863	0.00312178	0.0166886	0.00388338	0.00396013
ADX17593	0.0231288	0.0252552	0.0308359	0.195063	0.0549905	0.0546623
ADX17594	0.00187084	0.00154187	0.00161543	0.0027096	0.00151043	0.001909
ADX17595	0.00321719	0.00338899	0.00372963	0.0127153	0.00753106	0.00688675
ADX17596	0.00207743	0.00176342	0.0018557	0.00529971	0.0016587	0.00180495
ADX17597	0.00140761	0.00157284	0.00154111	0.0079852	0.00404573	0.00364063
ADX17598	0.00473045	0.00533949	0.00615411	0.00432755	0.00521302	0.0050441
ADX17599	0.00657108	0.00680986	0.00719822	0.0392293	0.00579872	0.00561146
ADX17600	0.0124737	0.0131225	0.0119872	0.00692349	0.00867965	0.00906627
ADX17601	0.00179935	0.0020611	0.00169682	0.0146826	0.00265793	0.00302169
ADX17602	0.00942006	0.00974148	0.00991685	0.00878301	0.0104135	0.0107446
ADX17603	0.0603503	0.0622857	0.0553416	0.146616	0.0505911	0.0526058
ADX17604	0.00332374	0.00368787	0.00326251	0.003573	0.0042258	0.00397986
ADX17605	0.0477225	0.0440713	0.0451706	0.255845	0.0522792	0.0457428
ADX17606	0.000889522	0.000791507	0.000780459	0.000941596	0.000669637	0.000518165
ADX17607	0.0094794	0.00719401	0.00825163	0.0122922	0.00438264	0.00536813
ADX17608	0.00588778	0.00495099	0.00542539	0.0030978	0.0040292	0.00358098
ADX17609	0.00676992	0.00611568	0.00668909	0.0211899	0.00500347	0.00526979
ADX17610	0.000157609	6.74e-05	5.73e-05	0.00235777	0.000272671	0.000269602
ADX17611	0.000463121	0.000450194	0.000468648	0.00161559	0.000278031	0.000274902
ADX17612	0.00805859	0.00830842	0.00778622	0.00130039	0.00222048	0.00216478
ADX17613	0.00637353	0.0064852	0.00658001	0.00560825	0.00340488	0.00356905
ADX17614	0.00666272	0.00662038	0.00673784	0.00291301	0.00228833	0.00249848
ADX17615	0.0254163	0.0239293	0.0241584	0.0207446	0.0145581	0.0137545
ADX17616	0.000946324	0.00127655	0.00108597	0.00413224	0.00185087	0.0017662
ADX17617	0.00213558	0.00220807	0.00271876	0.00643524	0.00279003	0.00347153
ADX17618	0.0123717	0.0125836	0.0131379	0.0797173	0.0151043	0.0150307
ADX17619	0.0430617	0.0409437	0.0363453	0.033839	0.0222811	0.0189916
ADX17620	0.0401069	0.0442095	0.0420713	0.0141198	0.0156446	0.0145092
ADX17621	0.003701	0.00470676	0.00305481	0.0121396	0.00311938	0.00272714
ADX17622	0.00196736	0.00249241	0.00218656	0.00442882	0.00118497	0.0011467
ADX17623	0.0436998	0.0397019	0.0420603	0.0406836	0.0255227	0.0265219
ADX17624	0.0015136	0.00185855	0.00111169	0.0063362	0.00119852	0.00113856
ADX17625	0.00192613	0.00184579	0.00167776	0.0067498	0.00143231	0.00159827
ADX17626	0.00549295	0.00478547	0.00462913	0.0139066	0.00574646	0.00450837
ADX17627	0.00948189	0.00860138	0.00958988	0.00923714	0.00785374	0.00843815
ADX17628	0.0317675	0.0294071	0.0280866	0.0680224	0.0247045	0.0235297
ADX17629	0.157439	0.148893	0.15762	0.138645	0.164257	0.160672
ADX17630	0.112016	0.103823	0.108071	0.137677	0.175022	0.173052
ADX17631	0.011212	0.00975173	0.0116355	0.0118424	0.0167792	0.0153664
ADX17632	0.0227044	0.0209906	0.0226366	0.0204148	0.044125	0.0457489
ADX17633	0.0371906	0.0370743	0.0382617	0.109966	0.105928	0.101096
ADX17634	0.0143731	0.0138344	0.0133875	0.017626	0.0247656	0.0248567
ADX17635	0.13873	0.139242	0.131299	0.142309	0.219518	0.221154
ADX17636	0.104506	0.0929066	0.106259	0.566882	0.15733	0.150052
ADX17637	0.0114815	0.0111386	0.0122351	0.0124776	0.0252267	0.0257376
ADX17638	0.0226799	0.023586	0.0219835	0.389601	0.0500455	0.0494822
ADX17639	0.00363503	0.00353986	0.00320803	0.00426303	0.0119378	0.0110752
ADX17640	0.000688793	0.000807746	0.000584591	0.00170383	0.00107318	0.00124438
ADX17641	0.000633613	0.000447762	0.000672198	0.00322174	0.00267499	0.00239198
ADX17642	0.00129004	0.00110317	0.000860263	0.00891482	0.00605075	0.00666918
ADX17643	0.000170076	0.000169679	0.00021652	0.00413696	0.000429101	0.000560037
ADX17644	0.000797444	0.000692928	0.000753219	0.00345734	0.00423677	0.00373732
ADX17645	0.000526445	0.000692331	0.000456958	0.00339371	0.00106257	0.00124163
ADX17646	0.0105592	0.00990698	0.0098389	0.0268236	0.00758185	0.00706609
ADX17647	0.0138744	0.0141069	0.013522	0.0350866	0.0322916	0.0324581
ADX17648	0.000559632	0.000253785	0.000388612	0.0033979	0.00104741	0.00144174
ADX17649	0.00213458	0.00208253	0.00246225	0.00291723	0.00103783	0.000884934
ADX17650	0.00945265	0.00972531	0.0104044	0.0211092	0.0302882	0.0305761
ADX17651	0.0261917	0.0279971	0.0267486	0.0519736	0.0472882	0.0462964
ADX17652	0.0174923	0.0170116	0.0145965	0.0848427	0.031212	0.0348503
ADX17653	0.0110425	0.00980061	0.0105891	0.0821821	0.022867	0.0270743
ADX17654	0.0299334	0.0291457	0.0309624	0.129934	0.0407817	0.0408971
ADX17655	0.0380586	0.0377121	0.0403398	0.0961314	0.0439353	0.0400727
ADX17656	0.0127222	0.0127963	0.0139441	0.0850143	0.0198285	0.0203945
ADX17657	0.00611531	0.00647488	0.00644955	0.0017673	0.00231131	0.00276389
ADX17658	0.00492873	0.00510367	0.0044904	0.0102851	0.0105988	0.00986412
ADX17659	0.000785466	0.00081302	0.000924962	0.00339209	0.0016805	0.00163024
ADX17660	0.00125995	0.00173588	0.00198592	0.00197884	0.00387517	0.00459786
ADX17661	0.00264288	0.00232031	0.00183931	0.00470703	0.00409679	0.00348809
ADX17662	0.00909463	0.0089614	0.00878062	0.00819992	0.0141413	0.0130603
ADX17663	0.0061917	0.00617726	0.00682026	0.00371006	0.00913529	0.00983549
ADX17664	0.0388614	0.0359729	0.0381848	0.322523	0.0472351	0.0477695
ADX17665	0	0	0	0	0	0
ADX17666	0.0657242	0.0671833	0.0670747	0.0668081	0.0465388	0.046961
ADX17667	0.522059	0.532121	0.528606	0.330506	0.864192	0.878394
ADX17668	0.200915	0.209466	0.197325	2.07722	0.318274	0.327701
ADX17669	0.250589	0.241367	0.246494	0.200312	0.458325	0.461981
ADX17670	0.028047	0.0285503	0.0288478	0.0121036	0.0431708	0.0453698
ADX17671	0.0286025	0.0290036	0.0267959	0.012415	0.0409691	0.0390107
ADX17672	0.00544744	0.0052622	0.00489854	0.014794	0.00366502	0.00441755
ADX17673	0.00761283	0.00700707	0.00812854	0.0318717	0.00618593	0.00592027
ADX17674	0.00747053	0.00801561	0.0102283	0.0196417	0.00523479	0.00405068
ADX17675	0.0045017	0.0073784	0.00470762	0.0155103	0.00493251	0.00295186
ADX17676	0.0730383	0.072512	0.066936	0.372131	0.0625215	0.0591589
ADX17677	6.26e-05	6.24e-05	0	0.000464185	0.000252504	0.000149797
ADX17678	0.0330978	0.0333351	0.0349988	0.0186023	0.0284669	0.0273916
ADX17679	0.121522	0.129295	0.126849	0.0581012	0.124926	0.131214
ADX17680	0.0206127	0.0191268	0.0232974	0.0152551	0.018536	0.0182471
ADX17681	0.144477	0.142172	0.150554	0.0991381	0.140657	0.141661
ADX17682	0.0341479	0.0402728	0.0365633	0.0209776	0.0276609	0.025454
ADX17683	0.120676	0.119081	0.121773	0.0469689	0.0891881	0.0860815
ADX17684	0.0522712	0.0528679	0.0558037	0.11615	0.0464383	0.0456692
ADX17685	0.0215369	0.0219994	0.0212625	0.0103622	0.0125224	0.011561
ADX17686	0.0258218	0.0232635	0.0268962	0.0171621	0.0269121	0.0291702
ADX17687	0.0344111	0.0353406	0.0356477	0.0363016	0.0388132	0.0351446
ADX17688	0.0437462	0.0449965	0.0519272	0.0184927	0.0297474	0.0326588
ADX17689	0.021098	0.019496	0.019374	0.0163982	0.0132639	0.0120102
ADX17690	0.00683399	0.0067025	0.00688152	0.0041705	0.00445762	0.00453074
ADX17691	0.00724216	0.00679604	0.00429042	0.00331094	0.00225776	0.00286198
ADX17692	0.00806781	0.00858349	0.00770321	0.00940676	0.00870177	0.00865414
ADX17693	0.000482325	0.000343714	0.000409358	0.0117038	0.003857	0.00410694
ADX17694	0.000857467	0.000712889	0.00127356	0.00648104	0.00461521	0.00638857
ADX17695	0.0115866	0.0138025	0.009687	0.0510482	0.0360219	0.0354785
ADX17696	0.00349788	0.00517642	0.00400777	0.309424	0.0246162	0.0250838
ADX17697	0.00242247	0.00234642	0.0023055	0.0097351	0.00317105	0.00272231
ADX17698	0.00157052	0.00124268	0.00165467	0.00464402	0.00135542	0.00116724
ADX17699	0.00259477	0.00223165	0.00307553	0.00427902	0.00332295	0.00185705
ADX17700	0.00564673	0.00625951	0.00583086	0.0237715	0.00516679	0.00495838
ADX17701	0.00138571	0.00105892	0.0014263	0.00554273	0.000952136	0.000941419
ADX17702	0.000311046	0.0002903	0.000332117	0.000347479	8.1e-05	8.01e-05
ADX17703	6.25e-05	9.35e-05	7.95e-05	0.00141619	7.56e-05	0.00029914
ADX17704	0.00192384	0.00255913	0.00163279	0.0298031	0.00385952	0.00437453
ADX17705	0.00177407	0.00304428	0.00280058	0.000936196	0.00177606	0.00164278
ADX17706	0.000698785	0.000732012	0.000644965	0.00435017	0.000592377	0.000767001
ADX17707	0.000674202	0.000768719	0.000694823	0.00166774	0.000492482	0.000743222
ADX17708	2.27e-05	2.27e-05	2.89e-05	8.43e-05	1.83e-05	1.81e-05
ADX17709	0.000306944	0.000306228	0.000195382	0.00990503	0.00239929	0.00218294
ADX17710	0.00016577	0.000212636	0.000241187	0.00144496	0.00131924	0.0013422
ADX17711	0.000299697	0.000256284	0.000218022	0.00184748	0.00062219	0.00096835
ADX17712	0.000148357	0.000105722	5.4e-05	0.0015553	0.000273776	0.00042296
ADX17713	0.000109215	0.000155657	5.96e-05	0.000746153	0.000302316	0.000261549
ADX17714	0.000102793	0.000225618	0.000104691	0.000457693	0.000414954	0.000377461
ADX17715	0.00051065	0.00043304	0.000487573	0.00301055	0.00125745	0.00120253
ADX17716	0.000524311	0.000496934	0.000266995	0.00231291	0.00116409	0.00156953
ADX17717	0.00089652	0.00105705	0.000778186	0.00490576	0.00233594	0.00252109
ADX17718	0.000202087	0.000436834	0.000171515	0.000833153	0.000571048	0.000725941
ADX17719	0.00395121	0.00443474	0.00356305	0.0229415	0.0115639	0.0132736
ADX17720	0.00142864	0.00145924	0.00160225	0.00552529	0.00282863	0.00328555
ADX17721	0.000394994	0.000354666	0.000150858	0.00201929	0.000861034	0.000945937
ADX17722	8.34e-05	8.32e-05	0.000106212	0.000435679	0.000516405	0.000377395
ADX17723	0.000318705	0.000181692	0.000463698	0.0012764	0.00066165	0.000581514
ADX17724	9.29e-05	0.000173797	0.000177419	0.000220246	0.000206278	0.000241039
ADX17725	0.000137424	0.000308482	0.000218689	0.000566562	0.000499275	0.000329104
ADX17726	0.000427685	0.000326291	0.000256224	0.00338126	0.00160461	0.00136563
ADX17727	0.000364695	0.000363844	0.000397958	0.00274933	0.00206107	0.00207946
ADX17728	0.000443159	0.000442126	0.000317349	0.00226095	0.000961555	0.0011055
ADX17729	0.000148357	0.000126866	5.4e-05	0.00167763	0.000205332	0.000135347
ADX17730	0.00124137	0.00140361	0.00151013	0.0040033	0.00220491	0.00202594
ADX17731	0.000723346	0.000649493	0.000230219	0.00116305	0.0014892	0.00138582
ADX17732	0.000130624	7.11e-05	0.000105824	0.000636443	0.000373904	0.000568763
ADX17733	0.000175985	0.000120707	0.000126024	0.000498808	0.000435128	0.000386329
ADX17734	0.00016261	0.000144205	0.000115008	0.00183242	0.000568899	0.00038942
ADX17735	0.000314988	0.000209502	6.68e-05	0.00103889	0.000890077	0.000712429
ADX17736	6.93e-05	2.96e-05	5.04e-05	0.000293969	0.000127929	0.000126489
ADX17737	0.000411227	0.000374592	0.000546285	0.000810834	0.00148681	0.00181262
ADX17738	0.00935129	0.00910735	0.00846302	0.0119068	0.014432	0.0150567
ADX17739	0.000899348	0.000633353	0.000808193	0.00231191	0.000683384	0.000591231
ADX17740	0.000294269	0.000411016	0.000524478	0.000889676	0.000649386	0.000595095
ADX17741	0.000665378	0.000782367	0.000635309	0.00162631	0.000997654	0.00108127
ADX17742	0.000174031	0.000119367	0.000180014	0.0012556	0.000254666	0.000234434
ADX17743	0.00102282	0.000530628	0.00109379	0.000944571	0.00112307	0.00140436
ADX17744	0.00118471	0.00104949	0.00119618	0.0140548	0.00153367	0.0013289
[truncated: 3,214 more rows]

## Sheet: GSE117256_counts
Locus_tag	Gene	Uniprot ID	Feature	Start	End	Strand	WT_LB_R1	WT_LB_R2 raw countings	WT_LB_R3 raw countings	WT_SPI-2_R1 raw countings	WT_SPI-2_R2 raw countings	WT_SPI-2_R3 raw countings
SL1344_RS23640	finO	WP_000139307.1	CDS	21	584	-	599	763	620	724	884	949
SL1344_RS24690	sulII	WP_001043260.1	CDS	27	842	-	17374	19683	20795	18964	20254	20961
SL1344_RS00005	thr operon leader peptide	WP_001575544.1	CDS	190	255	+	3831	4275	4556	13346	13276	12056
SL1344_RS00010	thrA	WP_001264681.1	CDS	337	2799	+	1356	1475	1110	2646	2775	2789
SL1344_RS24205	repZ	WP_000907875.1	CDS	455	1486	+	1059	932	1201	3883	4088	4139
SL1344_RS23645	traX	WP_000177629.1	CDS	639	1379	-	248	301	249	357	436	476
SL1344_RS24695	repC	WP_000240536.1	CDS	1150	2001	-	2098	3429	1786	1609	1546	1739
SL1344_RS23650	traI	WP_000986921.1	CDS	1399	6657	-	1283	2148	1160	2738	3383	3600
SL1344_RS24700	repA	WP_000190708.1	CDS	1988	2827	-	2828	4015	2204	2637	2351	2536
SL1344_RS24210	yacA	WP_000079928.1	CDS	2395	2664	+	944	795	815	532	621	678
SL1344_RS24215	yacB	WP_000969996.1	CDS	2661	2942	+	961	1081	807	787	953	934
SL1344_RS00015	thrB	WP_000241685.1	CDS	2801	3730	+	1135	1381	1026	11749	15647	14483
SL1344_RS24705	SL1344_P3_0005	WP_007857788.1	CDS	2857	3063	-	2126	3021	2277	1941	2026	2245
SL1344_RS24220	yacC	WP_001057996.1	CDS	2982	3830	+	2082	2091	1938	2431	2880	2735
SL1344_RS24710	SL1344_P3_0006	WP_000455501.1	CDS	3065	3277	-	2290	1882	2266	1438	1583	1716
SL1344_RS24715	mobA	WP_001395566.1	CDS	3338	5467	-	3197	5252	2250	2854	2570	2920
SL1344_RS00020	thrC	WP_000781105.1	CDS	3734	5020	+	2084	2443	1857	12474	16304	16029
SL1344_RS24225	yadA	WP_001334658.1	CDS	3947	4420	+	560	492	594	689	818	871
SL1344_RS24230	yaeB	WP_000627831.1	CDS	4897	5163	-	300	335	261	592	620	704
ncRNA0491	RUF_107c.105		sRNA	5014	5162	+	374	507	329	2091	2589	2569
SL1344_RS00025	yaaA	WP_000906175.1	CDS	5114	5887	-	1786	1488	1904	2334	2681	2828
SL1344_RS24235	yafA	WP_001442119.1	CDS	5163	5657	-	474	600	492	1016	992	1165
SL1344_RS24720	mobC	WP_000238497.1	CDS	5666	5950	+	474	770	359	398	437	481
SL1344_RS24240	yafB	WP_000517689.1	CDS	5713	6315	-	958	1001	1095	1088	1125	1393
SL1344_RS00030	yaaJ	WP_001113820.1	CDS	5966	7396	-	876	759	956	3790	4619	4138
ncRNA0472	StyR-295		sRNA	6399	6507	+	15	7	13	24	25	27
SL1344_RS24725		WP_024259074.1	CDS	6630	7043	+	168	225	137	314	354	431
SL1344_RS24245	yagA	WP_001132021.1	CDS	6669	8015	+	1996	2221	1555	1348	1446	1575
SL1344_RS23655		WP_000450265.1	CDS	6739	6966	+	628	513	682	497	676	716
SL1344_RS23660		WP_000911322.1	CDS	6966	7364	+	813	1037	888	952	1130	1133
SL1344_RS24730	strB	WP_000480968.1	CDS	7015	7851	-	4995	4641	5745	6503	6670	7836
SL1344_RS23665	traD	WP_000009318.1	CDS	7373	9535	-	203	231	190	360	416	433
SL1344_RS00035	talB	WP_000130175.1	CDS	7665	8618	+	29163	16885	29823	15713	15356	18259
SL1344_RS24735	aph(3'')-Ib	WP_001082319.1	CDS	7851	8654	-	16300	19739	17949	18079	19860	20997
SL1344_RS24250	cib	WP_001283356.1	CDS	8294	10174	+	3669	3592	2613	37825	34209	42093
SL1344_RS00040	mog	WP_000380372.1	CDS	8729	9319	+	1933	1391	1954	764	778	861
SL1344_RS00045	yaaH	WP_000528527.1	CDS	9376	9942	-	163	160	439	226	270	236
SL1344_RS23670	traT	WP_000782438.1	CDS	9912	10643	-	14343	18255	13181	16317	15804	19165
SL1344_RS00050	htgA	WP_001103477.1	CDS	10092	10805	-	21	32	18	105	108	140
SL1344_RS24255	imm	WP_000762580.1	CDS	10192	10539	-	118	102	126	1048	1099	1282
SL1344_RS24260		WP_000142425.1	CDS	10658	11005	+	90	84	66	583	670	716
SL1344_RS23675	traS	WP_000792633.1	CDS	10679	11167	-	3136	5586	3136	3323	3516	4440
SL1344_RS00055	yaaI	WP_001258094.1	CDS	10841	11245	-	36	15	29	112	129	104
SL1344_RS24265		WP_000194563.1	CDS	11023	11613	-	515	831	349	359	348	419
SL1344_RS23680	traG	WP_001007087.1	CDS	11189	14011	-	1298	2201	1367	2258	2828	2977
SL1344_RS00060	dnaK	WP_000516125.1	CDS	11593	13509	+	87327	43502	99227	41662	43077	44997
SL1344_RS24270		WP_000343102.1	CDS	11610	11870	-	270	289	172	155	179	169
SL1344_RS24275	ybfA	WP_000465034.1	CDS	12439	12852	+	221	263	172	133	243	216
SL1344_RS24280	resA	WP_001164192.1	CDS	12854	13639	+	383	445	291	256	321	320
ncRNA0097	tpke11		sRNA	13514	13576	+	12653	5616	12290	5379	4275	5194
SL1344_RS00065	dnaJ	WP_001119009.1	CDS	13595	14734	+	4956	4242	6964	4315	4956	5599
SL1344_RS23685	traH	WP_001161719.1	CDS	14008	15390	-	247	316	213	393	494	487
SL1344_RS24285	parA	WP_000312331.1	CDS	14223	14855	+	1933	1926	1833	1415	1689	1833
ncRNA0208	STnc890		sRNA	14722	14786	+	252	125	397	176	178	266
SL1344_RS24290	SL1344_P2_0020	WP_000752652.1	CDS	14855	15229	+	1120	1349	1063	1132	1508	1761
SL1344_RS00070	SL1344_0014	WP_000534902.1	CDS	15014	15961	+	92	83	132	338	469	410
SL1344_RS23690	trbB	WP_000055840.1	CDS	15380	15928	-	144	141	99	191	274	246
SL1344_RS24295	stbA	WP_001217836.1	CDS	15468	16442	+	2123	2019	2039	2947	3686	3551
SL1344_RS23695	traQ	WP_001233881.1	CDS	15915	16208	-	77	81	69	134	206	182
SL1344_RS00075	SL1344_0015	WP_000026889.1	CDS	16088	16432	+	19	13	8	14	24	21
SL1344_RS23700	traF	WP_001226854.1	CDS	16422	17171	-	100	135	100	207	279	273
ncRNA0305	STnc3200		sRNA	16445	16493	-	4	5	9	15	6	14
SL1344_RS24300	stbB	WP_000272884.1	CDS	16446	16838	+	901	856	835	2225	2993	2741
SL1344_RS00080	SL1344_0016	WP_001068132.1	CDS	16493	17026	-	17	19	26	47	49	46
SL1344_RS24305		WP_000618104.1	CDS	16922	17101	-	308	225	346	369	364	390
ncRNA0306	STnc3210		sRNA	17025	17111	+	5	2	6	116	121	111
SL1344_RS00085	SL1344_0017	WP_000860682.1	CDS	17043	17486	-	12	3	13	19	21	25
SL1344_RS23705	trbE	WP_000700023.1	CDS	17183	17398	-	42	60	42	64	103	117
SL1344_RS23710	traN	WP_000827529.1	CDS	17409	19235	-	218	382	213	446	686	664
SL1344_RS24310	yccB	WP_001134319.1	CDS	17495	18421	+	76	105	55	266	313	366
SL1344_RS00090	chiA	WP_000235798.1	CDS	17867	19966	+	221	258	255	628	754	733
SL1344_RS24315	ycdB	WP_000086147.1	CDS	18806	19489	+	9	9	5	20	22	16
SL1344_RS23715		WP_001229397.1	CDS	19232	19651	-	57	82	46	100	162	138
SL1344_RS24320	yceA	WP_001104881.1	CDS	19490	19711	+	7	8	4	7	9	12
SL1344_RS23720	trbC	WP_000554823.1	CDS	19688	20326	-	86	129	73	171	215	208
SL1344_RS24325	yceB	WP_000274500.1	CDS	19725	20159	+	25	30	23	27	39	43
SL1344_RS00095	SL1344_0019	WP_000155792.1	CDS	20058	23054	+	178	252	199	363	489	476
SL1344_RS24330	ycfA	WP_001005043.1	CDS	20205	20981	+	50	77	33	105	144	115
SL1344_RS23725	SL1344_P1_0018	WP_001197741.1	CDS	20311	20550	-	51	50	45	77	75	84
SL1344_RS23730	traU	WP_000833320.1	CDS	20638	21630	-	93	103	78	127	175	188
SL1344_RS24335		WP_000554464.1	CDS	21097	21318	-	15	31	22	26	21	26
SL1344_RS24340	ycgB	WP_001198939.1	CDS	21399	21824	+	30	27	19	25	21	47
SL1344_RS23735	traW	WP_000871995.1	CDS	21627	22259	-	64	98	51	98	100	112
SL1344_RS24345	ycgC	WP_000271705.1	CDS	21871	22293	+	49	67	32	86	93	97
SL1344_RS23740	trbI	WP_000105164.1	CDS	22256	22642	-	30	45	32	52	48	39
SL1344_RS24350		WP_001027495.1	CDS	22290	22481	+	25	28	13	43	34	48
SL1344_RS24355		WP_001434357.1	CDS	22552	22866	+	15	17	10	39	37	32
SL1344_RS23745	traC	WP_000793310.1	CDS	22617	25265	-	166	187	188	346	457	513
SL1344_RS24360	ssb	WP_001276120.1	CDS	23250	23777	+	18	29	20	24	28	18
SL1344_RS00100	SL1344_0020	WP_000738617.1	CDS	23335	24039	+	91	46	100	76	103	118
SL1344_RS24365		WP_000006024.1	CDS	23835	24068	+	18	17	15	61	57	91
SL1344_RS24370	ycjA	WP_001145480.1	CDS	24127	26085	+	189	188	149	569	854	694
SL1344_RS00105	bcfA	WP_000743357.1	CDS	24469	25011	+	99	77	91	113	113	141
SL1344_RS00110	bcfB	WP_000742554.1	CDS	25112	25798	+	24	29	25	32	37	38
SL1344_RS23750		WP_001239255.1	CDS	25281	25544	-	19	27	17	21	24	31
SL1344_RS23755	SL1344_P1_0023	WP_000549562.1	CDS	25661	26128	-	35	48	34	24	49	53
SL1344_RS00115	bcfC	WP_001245854.1	CDS	25803	28424	+	104	118	86	198	259	220
SL1344_RS23760	traR	WP_001278699.1	CDS	26121	26342	-	14	17	18	15	16	26
SL1344_RS24375	psiB	WP_000845897.1	CDS	26140	26574	+	90	93	75	174	280	240
SL1344_RS23765	traV	WP_001079995.1	CDS	26477	26992	-	178	158	135	186	201	206
SL1344_RS24380	psiA	WP_001276263.1	CDS	26571	27290	+	212	186	145	358	456	391
SL1344_RS23770	trbD	WP_001026266.1	CDS	26989	27225	-	78	79	59	69	88	87
SL1344_RS23775	traP	WP_000527897.1	CDS	27212	27808	-	100	106	83	57	57	64
SL1344_RS24385	SL1344_P2_0039	WP_000978012.1	CDS	27287	27883	+	336	344	240	602	725	719
SL1344_RS23780	traB	WP_000146700.1	CDS	27798	29219	-	43	69	53	63	87	99
SL1344_RS24390		WP_000554462.1	CDS	28045	28266	-	12	14	6	14	18	19
SL1344_RS24395	ard	WP_000117622.1	CDS	28346	28846	+	73	89	54	119	151	161
SL1344_RS00120	bcfD	WP_000701247.1	CDS	28425	29432	+	62	50	62	120	154	162
SL1344_RS23785	traK	WP_001230719.1	CDS	29219	29959	-	75	141	55	89	104	124
SL1344_RS00125	bcfE	WP_001082039.1	CDS	29433	29978	+	25	27	22	42	69	85
SL1344_RS24400	ydfA	WP_000218864.1	CDS	29575	30009	+	16	17	5	33	53	41
SL1344_RS23790	traE	WP_000399768.1	CDS	29946	30512	-	10	46	17	29	40	44
SL1344_RS00130	bcfF	WP_001243232.1	CDS	29994	30512	+	36	32	51	36	54	48
SL1344_RS24405		WP_000774889.1	CDS	30112	30366	-	10	16	11	28	45	45
SL1344_RS24410	ydgA	WP_000038402.1	CDS	30434	31360	+	860	1113	898	1460	2031	2044
SL1344_RS00135	bcfG	WP_001737970.1	CDS	30505	31209	+	33	42	38	80	68	69
SL1344_RS23795	traL	WP_000012129.1	CDS	30534	30845	-	34	39	28	58	85	74
SL1344_RS23800	traA	WP_001273051.1	CDS	30860	31222	-	28	42	28	60	72	78
SL1344_RS00140	bcfH	WP_000291392.1	CDS	31274	32119	+	96	112	97	130	135	163
SL1344_RS24415		WP_000150323.1	CDS	31423	31605	+	42	69	62	125	183	253
SL1344_RS23805	traJ	WP_000336297.1	CDS	31585	32271	-	15	9	27	55	40	59
SL1344_RS24420		WP_000148286.1	CDS	31636	31887	-	118	183	129	122	146	166
SL1344_RS00145	SL1344_0029	WP_000839833.1	CDS	32158	32445	+	44	48	51	107	118	140
SL1344_RS23810	traM	WP_001151546.1	CDS	32464	32844	-	171	129	135	172	167	183
SL1344_RS24425	ydiA	WP_001077019.1	CDS	32467	33315	+	43	16	32	324	564	345
SL1344_RS00150	SL1344_0030	WP_001250362.1	CDS	32545	32994	-	10	4	5	3	15	15
SL1344_RS23815	SL1344_P1_0036	WP_014344446.1	CDS	33259	33729	+	260	261	204	246	250	249
SL1344_RS00155	SL1344_0031	WP_001247395.1	CDS	33364	34368	+	44	37	54	66	64	65
SL1344_RS24430	SL1344_P2_0047A	WP_000157095.1	CDS	33401	33736	-	2737	2412	2101	1576	1755	2103
SL1344_RS24435	nikA	WP_001281051.1	CDS	33969	34301	+	413	474	441	402	471	551
SL1344_RS23820		WP_001677522.1	CDS	34252	34542	-	7	20	14	53	41	30
SL1344_RS00160	SL1344_0032	WP_000158347.1	CDS	34376	34816	-	6	7	28	17	17	20
SL1344_RS24440	nikB	WP_000128933.1	CDS	34396	37011	+	2154	2271	2284	2579	2762	3118
SL1344_RS23825		WP_001677523.1	CDS	34589	34858	-	47	56	52	70	90	92
SL1344_RS00165	SL1344_0033	WP_001036514.1	CDS	35339	37057	+	123	154	112	157	197	218
SL1344_RS23830	psiA	WP_001265368.1	CDS	35368	35973	-	51	81	60	101	140	158
SL1344_RS23835	psiB	WP_001244365.1	CDS	36102	36533	-	39	87	76	73	135	78
SL1344_RS23840	SL1344_P1_0039	WP_000117513.1	CDS	36576	38573	-	36	84	55	98	131	115
SL1344_RS24445	trbC	WP_031603148.1	CDS	37048	39123	-	628	711	553	1082	1204	1210
SL1344_RS00170	SL1344_0034	WP_000262866.1	CDS	37103	38674	-	225	225	250	699	843	805
SL1344_RS23845	SL1344_P1_0040	WP_000131520.1	CDS	38642	38884	-	26	14	13	23	26	31
SL1344_RS00175	SL1344_0035	WP_000791534.1	CDS	38773	39534	-	10	10	12	20	27	35
SL1344_RS23850	ssbB	WP_000741240.1	CDS	38939	39457	-	18	14	26	13	23	24
SL1344_RS24450	trbB	WP_000151583.1	CDS	39332	40402	-	246	210	180	324	400	324
SL1344_RS23855		WP_000449983.1	CDS	39952	40200	+	6	0	3	12	17	15
SL1344_RS00180	SL1344_0036	WP_000831880.1	CDS	40131	41624	+	736	620	671	497	611	639
SL1344_RS23860	SL1344_P1_0042	WP_000015983.1	CDS	40158	40481	-	144	139	129	579	750	765
SL1344_RS24455	trbA	WP_000121274.1	CDS	40421	41629	-	175	148	112	264	282	301
SL1344_RS23865	SL1344_P1_0043	WP_043942466.1	CDS	40717	41058	-	46	33	27	86	89	84
SL1344_RS23870	SL1344_P1_0044	WP_001200150.1	CDS	41218	41652	-	23	32	18	62	108	89
ncRNA0215	STnc1010		sRNA	41629	41707	+	108	89	78	61	77	83
SL1344_RS00185	SL1344_0037	WP_000971148.1	CDS	41723	42913	+	185	172	181	250	230	267
SL1344_RS24460	pndA	WP_001331364.1	CDS	41921	42073	+	106157	89833	82324	63920	64620	68460
SL1344_RS24465		WP_001291965.1	CDS	42145	42396	-	288	382	279	433	438	495
SL1344_RS23875	SL1344_P1_0045	WP_001246548.1	CDS	42148	42912	-	61	143	47	88	120	136
SL1344_RS24470	SL1344_P2_0054A	WP_001275298.1	CDS	42696	42992	+	42550	39296	39537	54626	62062	56252
SL1344_RS00190	SL1344_0038	WP_014411390.1	CDS	42938	44185	+	96	97	104	133	149	145
SL1344_RS23880	SL1344_P1_0047	WP_000990115.1	CDS	42984	43397	-	9	11	6	10	9	13
SL1344_RS23885	SL1344_P1_0048	WP_001109588.1	CDS	43453	43674	-	5	6	9	15	11	16
SL1344_RS24475		WP_000062603.1	CDS	43625	43834	+	1849	1322	1415	1253	1438	1576
SL1344_RS23890	SL1344_P1_0049	WP_000088645.1	CDS	43674	44354	-	0	1	2	5	8	3
SL1344_RS24480	exc	WP_000653334.1	CDS	43906	44568	-	4660	4467	4597	2733	2935	3444
SL1344_RS00195	SL1344_0039	WP_001094892.1	CDS	44312	46027	+	469	560	375	1143	1259	1452
SL1344_RS23895		WP_000091632.1	CDS	44499	44687	-	4	7	4	19	10	14
SL1344_RS24485	traY	WP_000698351.1	CDS	44633	46795	-	590	783	463	1044	1142	1039
SL1344_RS23900	SL1344_P1_0050	WP_000369839.1	CDS	44736	45092	-	6	8	4	22	21	27
SL1344_RS23905		WP_031602401.1	CDS	45085	45309	-	1	2	1	3	5	2
ncRNA0131	STnc10		sRNA	46050	46114	-	1	3	2	47	41	50
SL1344_RS23910	samA	WP_000925627.1	CDS	46066	46488	+	263	243	272	411	498	507
SL1344_RS00200	nhaA	WP_000681340.1	CDS	46190	47356	+	3851	5162	2354	3113	3529	3998
SL1344_RS23915	samB	WP_000457541.1	CDS	46488	47762	+	227	314	217	698	894	1005
SL1344_RS24490	traX	WP_001037987.1	CDS	46892	47476	-	188	172	133	155	212	210
SL1344_RS00205	nhaR	WP_001519185.1	CDS	47424	48317	+	2794	3929	2001	1664	1851	2330
SL1344_RS24495	traW	WP_001189161.1	CDS	47505	48707	-	323	293	192	184	238	248
SL1344_RS23920	parB	WP_000064272.1	CDS	47844	48818	-	8758	6362	7956	4643	4754	5369
SL1344_RS00210	SL1344_0042	WP_001116457.1	CDS	48372	50411	-	448	457	340	467	475	454
SL1344_RS23925	parA	WP_000427676.1	CDS	48818	50023	-	4941	2737	4460	3553	3938	4152
SL1344_RS24500	traU	WP_001024779.1	CDS	49288	52332	-	750	647	577	922	1088	1113
SL1344_RS23930	samB2	WP_000728917.1	CDS	50438	51379	+	3994	5188	4550	4365	5797	5687
SL1344_RS00215	SL1344_0043	WP_000099996.1	CDS	50451	51824	-	125	94	79	70	82	63
SL1344_RS23935		WP_001541562.1	CDS	51411	51977	-	520	631	801	719	708	861
SL1344_RS23940		WP_001527010.1	CDS	52034	52369	-	496	580	801	515	533	602
ncRNA0132	STnc20		sRNA	52094	52272	+	62	157	77	69	73	95
SL1344_RS00220	rpsT	WP_001518655.1	CDS	52280	52543	-	5717	2832	8333	11477	11205	10833
SL1344_RS24505	traT	WP_001164788.1	CDS	52422	53222	-	221	243	168	110	160	131
ncRNA0416	StyR-29		sRNA	52537	52672	-	1407	554	2494	3362	3686	3753
SL1344_RS23945	SL1344_P1_0058	WP_001676651.1	CDS	52553	52936	-	345	415	584	466	593	564
SL1344_RS00225	yaaY	WP_001575565.1	CDS	52649	52864	+	79	75	121	226	334	279
SL1344_RS00230	ribF	WP_000767311.1	CDS	52872	53810	+	1386	1475	1735	2098	2550	2620
SL1344_RS23950	tlpA	WP_001247118.1	CDS	53055	54170	-	2196	2013	2879	1790	2112	1977
SL1344_RS24510	traS	WP_001277255.1	CDS	53206	53394	-	43	47	42	18	29	21
SL1344_RS24515	traR	WP_000086957.1	CDS	53458	53862	-	339	369	213	64	65	66
SL1344_RS00235	ileS	WP_001737973.1	CDS	53855	56689	+	9015	9865	10204	9221	10372	11019
SL1344_RS24520	traQ	WP_001055569.1	CDS	53913	54440	-	252	233	122	133	117	154
SL1344_RS23955	SL1344_P1_0060	WP_001135407.1	CDS	54429	54917	+	322	357	355	960	1341	1337
SL1344_RS24525	traP	WP_000801920.1	CDS	54440	55144	-	576	592	314	365	418	479
SL1344_RS24530	traO	WP_001272005.1	CDS	55144	56433	-	699	843	387	319	440	441
SL1344_RS23960	SL1344_P1_0061	WP_001541566.1	CDS	55572	56312	+	3242	4384	3407	26619	37485	37478
SL1344_RS24535	traN	WP_001191877.1	CDS	56436	57419	-	354	391	193	58	103	76
SL1344_RS23965	rlgA	WP_001240331.1	CDS	56519	57079	+	1995	2606	2012	7543	10252	10755
SL1344_RS00240	lspA	WP_000042739.1	CDS	56689	57189	+	2232	2200	2421	2643	2804	3028
SL1344_RS23970	rlgA2	WP_000098783.1	CDS	57063	58727	+	3098	4242	3196	9759	12517	13536
SL1344_RS00245	fkpB	WP_000047269.1	CDS	57344	57793	+	1070	990	1179	1553	1608	1780
SL1344_RS24540	traM	WP_000138548.1	CDS	57430	58122	-	374	438	196	309	412	348
SL1344_RS00250	ispH	WP_001166422.1	CDS	57796	58746	+	2137	2113	2316	2749	3040	3303
SL1344_RS24545	traL	WP_001055900.1	CDS	58119	58466	-	235	244	113	254	300	254
SL1344_RS24550	sogL	WP_001141529.1	CDS	58484	62251	-	1529	1512	766	1049	1411	1200
SL1344_RS23975	SL1344_P1_0064	WP_001262004.1	CDS	58717	59685	+	1632	2220	1655	4684	6404	6727
ncRNA0133	STnc30		sRNA	58792	58923	+	219	162	252	441	463	512
SL1344_RS00255	SL1344_0051	WP_000516322.1	CDS	58946	60148	+	1826	2151	1678	1060	1096	1121
SL1344_RS23980	SL1344_P1_0065	WP_001121399.1	CDS	59874	60911	-	111	86	124	215	241	247
SL1344_RS00260	rihC	WP_000127283.1	CDS	60164	61084	+	2365	2169	2368	1240	1388	1399
SL1344_RS00265	citB2	WP_000377406.1	CDS	61106	61792	-	172	162	220	391	473	465
SL1344_RS23985	spvR	WP_000346691.1	CDS	61520	62413	+	10	16	24	506	748	701
SL1344_RS00270	citA2	WP_001737977.1	CDS	61794	63413	-	199	245	228	1052	1361	1309
ncRNA0307	STnc3220		sRNA	61807	62034	+	100	175	162	203	218	219
SL1344_RS24555	nuc	WP_000014583.1	CDS	62341	62892	-	265	253	170	143	147	139
SL1344_RS23990		WP_001576629.1	CDS	62587	62751	+	4	1	1	120	149	183
SL1344_RS23995	spvA	WP_001526990.1	CDS	62925	63692	+	91	83	65	5214	9701	9134
SL1344_RS24560	traJ	WP_001024972.1	CDS	63194	64342	-	353	367	220	131	141	126
SL1344_RS00275	SL1344_0055	WP_000444828.1	CDS	63548	64849	-	23	36	20	24	33	27
SL1344_RS24000	spvB	WP_001676648.1	CDS	63874	65649	+	183	244	163	8817	14370	15073
SL1344_RS24565	traI	WP_000646098.1	CDS	64339	65157	-	235	251	131	70	88	93
SL1344_RS00280	SL1344_0056	WP_000150421.1	CDS	64862	66637	-	23	18	26	41	38	45
SL1344_RS24570	traH	WP_001079808.1	CDS	65154	65612	-	107	87	49	42	39	37
SL1344_RS24005	spvC	WP_001122242.1	CDS	65930	66655	+	7	11	9	1360	2489	2618
SL1344_RS24575	traG	WP_000977522.1	CDS	66007	66591	-	56	94	53	131	145	153
SL1344_RS24580	traF	WP_000976351.1	CDS	66651	67853	-	2052	1671	1475	1024	1015	1186
SL1344_RS00285	oadG	WP_001001154.1	CDS	66654	66893	-	2	2	5	5	11	4
ncRNA0296	STnc3090		sRNA	66916	67048	+	17	11	12	89	126	172
SL1344_RS24010	spvD	WP_001575489.1	CDS	66916	67566	+	20	13	18	1276	2138	2246
ncRNA0366	STnc4160		sRNA	66919	67051	-	64	122	68	69	141	203
SL1344_RS00290	SL1344_0058	WP_000183602.1	CDS	67052	68392	-	59	48	58	93	153	165
SL1344_RS24015	SL1344_P1_0071	WP_001687480.1	CDS	67693	67956	-	127	113	103	282	304	317
SL1344_RS24585	traE	WP_001238939.1	CDS	67938	68762	-	572	400	536	316	361	368
SL1344_RS24020	SL1344_P1_0072	end_range=68598,.	CDS	68174	68598	+	5741	4886	6547	4843	5317	5686
SL1344_RS24025		WP_000390505.1	CDS	68591	69007	-	6	7	8	12	10	10
SL1344_RS00295	citC2	WP_014411397.1	CDS	68649	69683	+	39	27	40	53	51	35
SL1344_RS24590	rci	WP_001139957.1	CDS	68913	70067	-	251	261	311	776	884	831
SL1344_RS24030	SL1344_P1_0073A	WP_001738676.1	CDS	69031	69627	-	6	15	9	16	19	19
SL1344_RS00300	citD2	WP_000691461.1	CDS	69713	70006	+	25	17	15	13	14	5
SL1344_RS24035	SL1344_P1_0074	WP_000905606.1	CDS	69880	70365	-	96	233	75	152	154	192
SL1344_RS00305	citE2	WP_001247803.1	CDS	70003	70872	+	75	55	58	58	61	63
SL1344_RS24595		WP_000008649.1	CDS	70154	70360	+	18	26	6	67	114	118
SL1344_RS24040		WP_001541544.1	CDS	70359	70868	-	304	394	248	402	372	513
SL1344_RS00310	citF2	WP_000665573.1	CDS	70883	72403	+	93	101	107	106	102	140
SL1344_RS24600	pilV	WP_001417545.1	CDS	71003	72295	-	182	229	122	218	313	329
SL1344_RS24045	SL1344_P1_0075	WP_000545754.1	CDS	71034	71585	-	933	1584	725	1348	1442	1467
SL1344_RS24050	rsdB	WP_000082169.1	CDS	71594	72376	-	1566	1528	1725	1693	1910	1960
SL1344_RS00315	citX2	WP_000679040.1	CDS	72403	72954	+	36	54	50	46	55	64
SL1344_RS24055	SL1344_P1_0077	WP_000198608.1	CDS	72411	72932	-	1426	1453	1588	1197	1528	1429
SL1344_RS24060	SL1344_P1_0078	WP_001266176.1	CDS	72929	73219	-	1231	1247	1230	969	1243	1166
SL1344_RS00320	citG2	WP_001103238.1	CDS	72932	73840	+	65	67	67	89	109	116
SL1344_RS24605	pilT	WP_000014116.1	CDS	72936	73496	-	756	717	494	104	106	89
SL1344_RS24065	ccdB	WP_001159863.1	CDS	73221	73526	-	1588	1648	1622	1107	1314	1290
SL1344_RS24610	pilS	WP_000959785.1	CDS	73506	74120	-	1076	1069	535	387	436	445
SL1344_RS24070	ccdA	WP_000813641.1	CDS	73528	73746	-	1555	1225	1587	973	1198	1240
SL1344_RS00325	dapB	WP_000544031.1	CDS	74020	74841	+	1760	1953	1568	4888	5949	6570
SL1344_RS24615	pilR	WP_001208805.1	CDS	74138	75235	-	703	796	394	194	213	237
SL1344_RS24075	SL1344_P1_0081	WP_001090415.1	CDS	74455	74943	+	1059	1201	1081	2645	3108	3190
ncRNA0010	DapZ		sRNA	74847	74924	+	4500	2885	2347	1630	1926	2165
ncRNA0308	STnc3230		sRNA	74891	75015	-	20	26	16	104	161	141
SL1344_RS00330		WP_000355307.1	CDS	74967	75242	-	16	24	13	101	159	136
SL1344_RS24620	pilQ	WP_000362202.1	CDS	75248	76801	-	718	845	380	247	274	295
SL1344_RS24080	SL1344_P1_0082	WP_001687482.1	CDS	75427	75723	+	62	65	56	237	286	299
ncRNA0125	sRNA26		sRNA	75473	75557	+	11	5	3	5	22	8
SL1344_RS00335	carA	WP_000597287.1	CDS	75883	77031	+	209	127	273	4770	5979	5474
SL1344_RS24085	repA2	WP_000361607.1	CDS	76229	77206	+	5590	5911	5494	6999	6632	7676
SL1344_RS24625	pilP	WP_001247336.1	CDS	76812	77264	-	327	370	160	51	70	51
SL1344_RS00340	carB	WP_001126305.1	CDS	77050	80277	+	1082	627	1026	12764	13947	13194
SL1344_RS24630	pilO	WP_000752774.1	CDS	77251	78546	-	702	672	370	321	325	375
SL1344_RS24090		end_range=77945,.	CDS	77465	77945	-	21	26	29	133	128	132
SL1344_RS24095		gbkey=CDS	CDS	78078	78459	-	68	89	81	498	648	459
SL1344_RS24635	pilN	WP_000748143.1	CDS	78539	80221	-	876	752	489	278	322	314
SL1344_RS24100	pefB	WP_000979451.1	CDS	79178	79480	+	18	8	18	18	14	14
SL1344_RS24105	pefA	WP_000748205.1	CDS	79755	80273	+	403	294	318	123	154	142
SL1344_RS24640	pilM	WP_000539807.1	CDS	80235	80672	-	120	148	76	20	15	37
SL1344_RS24110	pefC	WP_000007893.1	CDS	80501	82909	+	70	117	70	168	200	216
SL1344_RS00345	caiF	WP_000333324.1	CDS	80551	80946	+	717	683	1159	437	543	502
SL1344_RS24645	pilL	WP_000742600.1	CDS	80672	81739	-	419	336	184	26	35	40
SL1344_RS00350	caiE	WP_000122861.1	CDS	81023	81619	-	47	46	63	33	63	70
SL1344_RS00355	caiD	WP_000004385.1	CDS	81728	82513	-	141	106	131	45	41	60
SL1344_RS24650	pilJ	WP_000008893.1	CDS	82413	82865	-	58	49	35	28	29	35
SL1344_RS00360	caiC	WP_000355806.1	CDS	82567	84120	-	98	97	92	165	208	241
SL1344_RS24115	pefD	WP_001038510.1	CDS	82902	83594	+	71	105	61	103	139	156
SL1344_RS24655	pilI	WP_001136192.1	CDS	82908	83162	-	45	34	33	25	19	33
SL1344_RS24660	trcD	WP_000776428.1	CDS	83430	83996	-	498	463	488	737	988	923
SL1344_RS24120	SL1344_P1_0090	WP_015589604.1	CDS	83612	84166	+	111	137	110	269	307	339
SL1344_RS24665	traC	WP_000213857.1	CDS	84010	84693	-	376	377	355	744	956	899
SL1344_RS00365		gbkey=CDS	CDS	84183	85400	-	154	137	177	163	191	192
SL1344_RS24125	SL1344_P1_0091	WP_001526837.1	CDS	84407	85294	+	2514	2584	2873	7995	9576	9187
SL1344_RS24670	traB	WP_001303319.1	CDS	84947	85480	-	329	319	325	58	56	51
SL1344_RS00370	caiA	WP_000347134.1	CDS	85512	86654	-	345	364	378	184	205	169
SL1344_RS24130	pefI	WP_000004313.1	CDS	85726	85938	+	51	55	41	154	196	213
SL1344_RS24675	traA	WP_000483804.1	CDS	85922	86158	-	52	46	71	159	142	147
SL1344_RS24135	SL1344_P1_0093	WP_001526811.1	CDS	85923	86273	+	63	64	56	224	236	264
SL1344_RS24140	srgA	WP_024131145.1	CDS	86635	87171	+	42	55	55	60	88	84
SL1344_RS00375	caiT	WP_000787076.1	CDS	86689	88206	-	17	23	54	28	39	36
SL1344_RS24200		WP_000637314.1	CDS	86864	87070	+	15	22	8	21	23	14
SL1344_RS24145	srgB	WP_022637868.1	CDS	87358	88203	+	34	44	34	56	81	83
SL1344_RS24150	rcK	WP_000725062.1	CDS	88293	88850	+	162	397	174	103	135	171
SL1344_RS00380		WP_000264222.1	CDS	88434	88619	+	7	5	6	4	10	3
SL1344_RS00385	fixA	WP_000692185.1	CDS	88687	89457	+	89	52	117	76	95	98
SL1344_RS24155	srgC	WP_000417898.1	CDS	89117	89875	+	325	378	323	823	1074	1003
SL1344_RS00390	fixB	WP_001032189.1	CDS	89473	90414	+	71	51	100	40	53	49
SL1344_RS24160		WP_024133854.1	CDS	89972	90151	-	6	11	5	16	19	11
SL1344_RS00395	fixC	WP_001287777.1	CDS	90464	91750	+	68	66	90	79	95	93
SL1344_RS24165	repA	WP_000132731.1	CDS	91053	91922	-	1329	1108	1372	3435	4328	3980
SL1344_RS00400	fixX	WP_000203736.1	CDS	91747	92034	+	43	56	51	42	63	63
SL1344_RS24170	tap	WP_001541552.1	CDS	91915	91992	-	1428	1104	1577	2559	3536	3086
SL1344_RS24175		WP_001691570.1	CDS	91997	92164	-	8521	6149	7778	9190	9852	8094
SL1344_RS00405	yaaU	WP_001737995.1	CDS	92181	93521	+	155	150	193	466	539	522
SL1344_RS24180	repC	WP_000078115.1	CDS	92242	92487	-	3273	4200	3869	3392	3393	3582
SL1344_RS24185	SL1344_P1_0103	WP_010999935.1	CDS	92687	93130	-	245	347	272	521	532	631
SL1344_RS24190		WP_000983042.1	CDS	93296	93451	-	459	566	410	951	1067	1181
SL1344_RS24195	SL1344_P1_0104	gbkey=CDS	CDS	93494	93748	-	285	349	296	598	705	774
SL1344_RS00410	SL1344_0081	WP_001172089.1	CDS	93610	93840	+	171	176	115	1283	1230	1636
SL1344_RS00415	SL1344_0082	WP_000802644.1	CDS	94134	94550	+	333	636	346	5109	7230	7501
ncRNA0167	STnc470		sRNA	94653	94771	-	149	122	85	657	968	982
SL1344_RS00420	SL1344_0083	WP_000745961.1	CDS	94774	95064	-	233	250	175	1586	2466	2265
ncRNA0367	STnc4170		sRNA	95102	95188	+	16	6	8	21	22	33
ncRNA0376	SLnc0002		sRNA	95264	95384	-	48	60	29	731	1054	827
SL1344_RS00425		WP_014343787.1	CDS	95274	95468	+	2	3	5	13	6	10
SL1344_RS00430	SL1344_0084	WP_000066317.1	CDS	95962	97851	+	174	165	188	580	643	659
SL1344_RS00435	yabF	WP_000600709.1	CDS	98258	98788	+	97	93	67	250	249	308
SL1344_RS00440	kefC	WP_000377155.1	CDS	98781	100643	+	350	758	266	830	892	1142
SL1344_RS00445	folA	WP_000624381.1	CDS	100842	101321	+	315	267	310	498	629	645
ncRNA0492	RUF_107c.1		sRNA	101262	101488	-	386	448	372	735	775	899
SL1344_RS00450	apaH	WP_000257211.1	CDS	101427	102275	-	1479	1802	1352	3214	3395	3970
SL1344_RS00455	apaG	WP_000610894.1	CDS	102286	102663	-	1145	1111	1296	2493	2638	2917
SL1344_RS00460	ksgA	WP_001065397.1	CDS	102666	103487	-	2204	1837	2211	4218	4669	5420
SL1344_RS00465	pdxAa	WP_000093011.1	CDS	103484	104473	-	2500	2350	2407	3955	3926	4461
SL1344_RS00470	surA	WP_000800482.1	CDS	104473	105759	-	7240	5148	6588	8898	9458	10276
SL1344_RS00475	imp	WP_000746126.1	CDS	105813	108173	-	6331	5507	6017	10117	11975	12164
SL1344_RS00480	djlA	WP_001200595.1	CDS	108427	109239	+	966	919	952	916	1186	1266
ncRNA0493	RUF_107c.2		sRNA	109242	109324	-	46	35	51	110	98	125
SL1344_RS00485	rluA	WP_000525196.1	CDS	109334	109993	-	529	479	575	964	1066	1080
SL1344_RS00490	hepA	WP_001116976.1	CDS	110005	112911	-	1027	814	1194	2339	2562	2665
SL1344_RS00495	polB	WP_000035723.1	CDS	113085	115436	-	496	620	522	990	1116	1140
SL1344_RS00500	SL1344_0099	WP_000877512.1	CDS	115480	116100	-	102	66	92	105	141	111
SL1344_RS00505	SL1344_0100	WP_001103147.1	CDS	116819	117238	+	25	15	15	36	38	27
SL1344_RS00510	araD	WP_000888683.1	CDS	117244	117939	-	90	76	91	77	86	92
SL1344_RS00515	araA	WP_000151691.1	CDS	118080	119582	-	135	95	108	167	169	186
SL1344_RS00520	araB	WP_000951812.1	CDS	119593	121302	-	78	72	68	86	70	59
ncRNA0447	StyR-199		sRNA	120107	120156	+	28	26	26	88	106	88
SL1344_RS00525	araC	WP_000852387.1	CDS	121643	122488	+	1435	1387	1343	538	658	646
SL1344_RS00530	yabI	WP_001148368.1	CDS	122607	123374	+	630	727	600	477	559	571
SL1344_RS00535	thiQ	WP_000915965.1	CDS	123413	124120	-	180	206	188	804	934	950
SL1344_RS00540	thiP	WP_000235634.1	CDS	124104	125714	-	453	515	473	2911	3313	3331
SL1344_RS00545	tbpA	WP_000915326.1	CDS	125690	126673	-	339	347	361	2417	2923	3050
ncRNA0084	SroA		sRNA	126714	126802	-	103	46	115	274	324	337
SL1344_RS00550	yabN	WP_001139040.1	CDS	126851	128509	-	503	465	534	530	510	520
ncRNA0073	SgrS		sRNA	128577	128815	+	6203	10348	5945	2292	2712	3076
SL1344_RS00555	sgrT	WP_001248755.1	CDS	128602	128724	+	5506	9603	5522	2080	2554	2823
SL1344_RS00560	leuD	WP_000818267.1	CDS	129060	129665	-	323	254	307	340	344	371
SL1344_RS00565	leuC	WP_001140629.1	CDS	129676	131076	-	489	367	391	670	637	607
SL1344_RS00570	leuB	WP_000042325.1	CDS	131079	132170	-	470	352	397	637	745	645
SL1344_RS00575	leuA	WP_000082819.1	CDS	132170	133741	-	292	207	208	669	614	687
SL1344_RS00580	leuL	WP_001575587.1	CDS	133829	133915	-	318	310	345	971	1004	907
SL1344_RS00585	leuO	WP_001115420.1	CDS	134572	135516	+	31	32	31	94	123	109
SL1344_RS00590	ilvI	WP_000425604.1	CDS	135838	137562	+	389	430	408	955	1045	1172
SL1344_RS00595	ilvH	WP_001563086.1	CDS	137565	138056	+	348	686	333	918	1104	1269
ncRNA0246	STnc1500		sRNA	138100	138274	-	32	49	40	57	87	65
SL1344_RS00600	fruR	WP_000762406.1	CDS	138340	139344	+	3799	3162	3756	901	1039	1018
ncRNA0114	sRNA11		sRNA	139457	139729	+	49	24	47	34	31	39
SL1344_RS00605	mraZ	WP_000488294.1	CDS	139950	140408	+	6258	5563	5684	8487	8812	9583
SL1344_RS00610	mraW	WP_000970444.1	CDS	140410	141351	+	5802	7146	5324	9240	10870	11115
SL1344_RS00615	ftsL	WP_000625651.1	CDS	141348	141713	+	3714	3778	3007	4328	4938	5037
SL1344_RS00620	ftsI	WP_000642235.1	CDS	141729	143495	+	20590	14131	16147	25563	30199	34520
ncRNA0168	STnc475		sRNA	142801	142976	+	16451	10237	12661	21189	25884	29769
SL1344_RS00625	murE	WP_000775073.1	CDS	143482	144969	+	3213	4594	2746	3615	3919	4686
SL1344_RS00630	murF	WP_000626630.1	CDS	144966	146324	+	5542	5169	4592	5044	4908	5724
SL1344_RS00635	mraY	WP_000964141.1	CDS	146318	147400	+	3940	4135	3550	4254	4435	5070
SL1344_RS00640	murD	WP_000796445.1	CDS	147403	148719	+	5016	6113	4279	5391	5330	6105
SL1344_RS00645	ftsW	WP_001239803.1	CDS	148719	149963	+	3208	4000	2917	3529	3641	4314
SL1344_RS00650	murG	WP_000016613.1	CDS	149960	151027	+	3220	3965	2868	3854	3840	4287
SL1344_RS00655	murC	WP_001096070.1	CDS	151146	152621	+	4740	5800	4133	5406	5656	6249
SL1344_RS00660	ddlB	WP_000763905.1	CDS	152614	153534	+	4205	5570	3609	3827	4096	4714
SL1344_RS00665	ftsQ	WP_000075728.1	CDS	153536	154366	+	2083	3213	1978	3576	3891	4500
SL1344_RS00670	ftsA	WP_000588463.1	CDS	154363	155625	+	6022	7112	5072	6376	7364	8349
SL1344_RS00675	ftsZ	WP_000462785.1	CDS	155686	156837	+	10838	11869	8731	10977	11864	13805
SL1344_RS00680	lpxC	WP_000595487.1	CDS	156938	157855	+	25165	21595	23440	21729	23626	24420
SL1344_RS00685	yacA	WP_000014333.1	CDS	158134	158631	+	1826	1418	2019	1500	1521	1564
SL1344_RS00690	secA	WP_000905756.1	CDS	158693	161398	+	10092	7475	10904	6856	6637	7678
ncRNA0134	STnc40		sRNA	161417	161558	+	555	294	530	344	358	439
SL1344_RS00695	mutT	WP_000736056.1	CDS	161550	161945	+	95	196	131	452	750	729
SL1344_RS00700		WP_001521503.1	CDS	161979	162113	-	380	487	436	786	673	723
SL1344_RS00705	yacG	WP_001286419.1	CDS	162267	162458	-	763	803	896	689	753	711
SL1344_RS00710	yacF	WP_000557442.1	CDS	162468	163211	-	899	725	1020	819	967	887
SL1344_RS00715	coaE	WP_001270913.1	CDS	163211	163831	-	895	569	940	881	984	901
SL1344_RS00720	guaC	WP_001217365.1	CDS	164057	165100	+	6589	4988	6850	6590	6604	8874
SL1344_RS00725	pilC	WP_000114087.1	CDS	165131	166333	-	31	22	31	52	46	66
SL1344_RS00730	pilB	WP_000650592.1	CDS	166323	167708	-	39	36	39	47	44	46
SL1344_RS00735	pilA	WP_000414989.1	CDS	167718	168155	-	10	7	10	12	7	9
SL1344_RS00740	nadC	WP_001135135.1	CDS	168377	169270	-	960	683	938	1039	1081	1105
SL1344_RS00745	ampD	WP_000936329.1	CDS	169358	169921	+	946	887	943	986	1052	997
SL1344_RS00750	ampE	WP_000172039.1	CDS	169918	170772	+	1124	1422	1133	1716	1895	1924
SL1344_RS00755	SL1344_0148	WP_000024779.1	CDS	170864	171814	-	215	230	172	282	301	325
SL1344_RS00760	SL1344_0149	WP_000357540.1	CDS	171814	173220	-	56	60	78	174	246	213
SL1344_RS00765	aroP	WP_000378215.1	CDS	173384	174754	-	758	763	610	2086	2380	2161
SL1344_RS00770	pdhR	WP_000331771.1	CDS	175320	176084	+	1553	1754	2806	4864	7075	6450
ncRNA0094	tp2		sRNA	176086	176242	-	8	4	4	20	8	11
ncRNA0424	StyR-51		sRNA	176086	176169	+	293	449	596	1530	1918	1893
SL1344_RS00775	aceE	WP_000003852.1	CDS	176244	178907	+	20737	20588	26836	27180	36820	36357
SL1344_RS00780	aceF	WP_000963612.1	CDS	178922	180811	+	20205	20474	21695	22890	29307	30685
SL1344_RS00785	lpdA	WP_001519338.1	CDS	181011	182435	+	55698	40445	34555	23598	26324	27113
ncRNA0135	STnc50		sRNA	182462	182543	-	25	31	17	13	8	9
SL1344_RS00790	SL1344_0155	WP_000765363.1	CDS	182724	183008	+	56	29	47	53	49	60
SL1344_RS00795	SL1344_0156	WP_000757452.1	CDS	183046	183837	-	28	31	29	79	110	86
SL1344_RS00800		gbkey=CDS	CDS	183850	185464	-	175	179	147	579	654	655
SL1344_RS00805	acnB	WP_000888962.1	CDS	185853	188450	+	25703	34854	14541	3948	3880	4369
SL1344_RS00810	SL1344_0160	WP_000536990.1	CDS	188511	189353	-	2000	1340	1547	3570	2684	3821
SL1344_RS00815	yacL	WP_000384308.1	CDS	189599	189961	+	2594	3258	2547	790	861	1073
SL1344_RS00820	kdgT	WP_001022089.1	CDS	190196	191149	+	464	422	399	107	101	129
SL1344_RS00825	SL1344_0163	WP_000782192.1	CDS	191146	192417	+	735	774	661	204	197	239
SL1344_RS00830	pdxAb	WP_000448745.1	CDS	192407	193390	+	921	933	925	540	604	622
SL1344_RS00835	SL1344_0165	WP_000678254.1	CDS	193400	194167	+	2294	2440	2214	1830	1831	1938
SL1344_RS00840	speD	WP_000734276.1	CDS	194197	194991	-	1384	499	1702	1974	2176	2173
SL1344_RS00845	speE	WP_000829968.1	CDS	195012	195872	-	1267	504	1549	1256	1594	1369
SL1344_RS00850	yacC	WP_000846613.1	CDS	195979	196326	-	206	175	241	637	706	759
SL1344_RS00855	cueO	WP_000946047.1	CDS	196528	198138	+	1086	1063	781	1521	1717	2043
SL1344_RS00860	gcd	WP_000829731.1	CDS	198216	200606	-	904	1520	489	15686	16380	22397
SL1344_RS00865	hpt	WP_000683342.1	CDS	200812	201348	+	1601	937	1748	955	1114	1103
SL1344_RS00870	yadF	WP_000651591.1	CDS	201406	202068	-	5741	2606	5465	21390	21126	24625
SL1344_RS00875	yadG	WP_000150619.1	CDS	202177	203103	+	335	464	316	391	406	492
SL1344_RS00880	yadH	WP_000983414.1	CDS	203100	203870	+	449	922	417	486	507	507
SL1344_RS00885	stiH	WP_000794043.1	CDS	203987	205066	-	100	70	88	184	267	254
SL1344_RS00890	stiC	WP_001231776.1	CDS	205075	207621	-	81	69	89	149	187	205
SL1344_RS00895	stiB	WP_001086408.1	CDS	207648	208331	-	9	8	8	25	29	32
SL1344_RS00900	stiA	WP_000777532.1	CDS	208379	208918	-	78	49	72	55	76	76
SL1344_RS00905	yadI	WP_000901960.1	CDS	209289	209729	+	82	289	285	55	75	68
SL1344_RS00910	yadE	WP_000245304.1	CDS	209791	211020	+	394	354	539	970	1129	1093
ncRNA0368	STnc4190		sRNA	209868	209971	-	2	2	3	21	19	11
SL1344_RS00915	panD	WP_000621526.1	CDS	211027	211407	-	1913	898	1731	2731	2889	2972
SL1344_RS00920	panC	WP_000905344.1	CDS	211502	212356	-	888	584	1245	1223	1293	1240
SL1344_RS00925	panB	WP_000805487.1	CDS	212482	213273	-	517	588	721	799	889	809
SL1344_RS00930	folK	WP_000150773.1	CDS	213394	213873	-	504	475	750	902	935	859
SL1344_RS00935	pcnB	WP_000174614.1	CDS	213870	215288	-	3154	1956	3570	4269	5109	4590
SL1344_RS00940	yadB	WP_001738007.1	CDS	215429	216325	-	608	455	687	909	978	1132
SL1344_RS00945	dksA	WP_001155232.1	CDS	216394	216849	-	59402	59115	53101	15749	16266	17527
SL1344_RS00950	sfsA	WP_000899412.1	CDS	217026	217730	-	1021	1061	908	2506	2617	2995
SL1344_RS00955	ligT	WP_001294181.1	CDS	217747	218277	-	562	635	538	763	810	803
SL1344_RS00960	hrpB	WP_001738008.1	CDS	218350	220779	+	2086	2515	1922	2949	3261	3303
SL1344_RS00965	mrcB	WP_000918127.1	CDS	220920	223442	+	4122	4627	3827	6203	6948	7577
ncRNA0494	RUF_107c.19		sRNA	223450	223563	+	389	311	325	506	533	633
SL1344_RS00970	fhuA	WP_000113220.1	CDS	223735	225924	+	284	329	241	17431	19908	19746
SL1344_RS00975	fhuC	WP_001157204.1	CDS	225973	226770	+	73	74	63	2546	2697	2857
SL1344_RS00980	fhuD	WP_001205357.1	CDS	226770	227660	+	81	102	75	2831	3231	3167
SL1344_RS00985	fhuB	WP_000088083.1	CDS	227657	229714	+	216	277	201	4015	4170	4314
ncRNA0126	sRNA28		sRNA	230133	230365	+	8	1	5	12	8	11
ncRNA0136	STnc60		sRNA	230168	230221	-	0	1	0	2	1	2
SL1344_RS00990	stfA	WP_001090554.1	CDS	230653	231213	+	72	44	38	85	81	97
SL1344_RS00995	stfC	WP_000951687.1	CDS	231299	233956	+	115	115	128	382	465	445
SL1344_RS01000	stfD	WP_000987334.1	CDS	233974	234726	+	25	18	27	62	65	82
SL1344_RS01005	stfE	WP_001250313.1	CDS	234745	235257	+	38	33	35	45	45	67
SL1344_RS01010	stfF	WP_000725075.1	CDS	235254	235730	+	44	42	47	47	70	81
SL1344_RS01015	stfG	WP_001129320.1	CDS	235730	236260	+	22	25	28	31	54	71
SL1344_RS01020	SL1344_0202	WP_000691870.1	CDS	236260	237099	+	329	407	381	654	740	787
ncRNA0247	STnc1510		sRNA	237091	237187	+	170	195	197	313	293	381
SL1344_RS01025	hemL	WP_000045268.1	CDS	237207	238487	-	2490	2049	2378	1963	2035	2228
SL1344_RS01030	clcA	WP_000845425.1	CDS	238657	240078	+	814	991	791	1361	1418	1571
SL1344_RS01035	yadR	WP_001278668.1	CDS	240160	240504	+	948	935	566	2574	3392	3139
SL1344_RS01040	yadS	WP_000964234.1	CDS	240605	241228	-	418	315	454	362	435	449
ncRNA0441	StyR-150		sRNA	241227	241270	+	18	9	14	92	88	93
SL1344_RS01045	btuF	WP_001118843.1	CDS	241265	242065	-	696	521	743	648	689	737
SL1344_RS01050	mtn	WP_000689821.1	CDS	242058	242756	-	2285	1747	2224	1359	1540	1686
SL1344_RS01055	dgt	WP_000146443.1	CDS	242841	244358	+	843	1045	699	1663	1950	2058
SL1344_RS01060	htrA	WP_000753958.1	CDS	244488	245915	+	11550	6983	8005	4166	4484	4636
ncRNA0297	STnc3100		sRNA	245838	245954	+	2222	907	1445	652	649	669
SL1344_RS01065	cdaR	WP_000929420.1	CDS	246068	247225	+	646	519	876	186	225	218
SL1344_RS01070	yaeH	WP_000272193.1	CDS	247314	247700	-	26265	27612	21653	9740	8817	11063
SL1344_RS01075	SL1344_0213	WP_000017171.1	CDS	247947	249248	+	761	1014	655	5965	8100	7721
ncRNA0298	STnc3110		sRNA	249153	249277	+	322	497	255	1853	2366	2427
SL1344_RS01080	dapD	WP_001186673.1	CDS	249285	250109	-	9401	5677	8004	6668	6759	7529
SL1344_RS01085	glnD	WP_001094519.1	CDS	250139	252811	-	1336	1193	1323	2217	2451	2561
SL1344_RS01090	map	WP_001018214.1	CDS	253048	253842	-	2371	1454	2483	3991	4121	4335
ncRNA0091	Tff		sRNA	254126	254276	+	5119	2245	7058	7370	8913	8176
SL1344_RS01095	rpsB	WP_000246886.1	CDS	254293	255018	+	32971	15657	38182	26793	30899	29277
SL1344_RS01100	tsf	WP_000808106.1	CDS	255276	256127	+	49675	29976	47126	23819	25436	26285
SL1344_RS01105	pyrH	WP_000224567.1	CDS	256272	256997	+	2469	2042	3225	2807	3246	3336
SL1344_RS01110	frr	WP_000622423.1	CDS	257144	257701	+	10684	6502	11072	9741	10425	11791
ncRNA0109	sRNA1		sRNA	257717	257816	+	1679	808	1615	1374	1464	1693
SL1344_RS01115	dxr	WP_000811905.1	CDS	257842	259038	+	1253	1231	1366	2071	1973	2314
ncRNA0209	STnc920		sRNA	259068	259166	+	378	445	403	458	494	535
SL1344_RS01120	uppS	WP_000947413.1	CDS	259351	260109	+	913	1121	1110	1486	1993	1981
SL1344_RS01125	cdsA	WP_000922422.1	CDS	260122	260979	+	1904	2425	2084	2405	3276	3088
SL1344_RS01130	yaeL	WP_000949017.1	CDS	260991	262343	+	5646	6523	5791	8865	10701	11320
SL1344_RS01135	yaeT	WP_001240935.1	CDS	262375	264789	+	21327	15257	19242	19163	21095	22968
SL1344_RS01140	hlpA	WP_000758966.1	CDS	264912	265397	+	24598	14232	23443	23495	23096	26551
SL1344_RS01145	lpxD	WP_001139265.1	CDS	265401	266426	+	10315	7562	11132	18135	18970	21014
SL1344_RS01150	fabZ	WP_000210741.1	CDS	266532	266987	+	2295	1886	2217	3431	3567	3759
SL1344_RS01155	lpxA	WP_000565950.1	CDS	266991	267779	+	4392	4670	4734	6569	7405	8045
SL1344_RS01160	lpxB	WP_000741212.1	CDS	267779	268927	+	3101	3927	3168	6329	6529	7291
SL1344_RS01165	rnhB	WP_000569412.1	CDS	268924	269520	+	1261	1525	1273	1976	2064	2205
SL1344_RS01170	dnaE	WP_001294825.1	CDS	269544	273026	+	4110	5076	4098	6149	7057	7412
SL1344_RS01175	accA	WP_000055753.1	CDS	273039	273998	+	3447	2286	3316	3023	3360	3543
SL1344_RS01180	SL1344_0234	WP_000524168.1	CDS	274178	275941	+	525	494	493	955	1128	1197
SL1344_RS01185	ldcC	WP_001021054.1	CDS	276017	278158	+	1200	1270	1125	1804	1885	2251
SL1344_RS01190	yaeR	WP_000901088.1	CDS	278214	278603	+	445	592	387	577	572	787
SL1344_RS01195	mesJ	WP_000210056.1	CDS	278666	279958	+	806	966	776	895	943	1126
SL1344_RS01200	rof	WP_000062330.1	CDS	280042	280302	-	4874	5238	3947	4387	5130	5779
SL1344_RS01205	yaeP	WP_001518678.1	CDS	280289	280489	-	3682	3939	3311	3655	4273	4874
SL1344_RS01210	yaeQ	WP_001185319.1	CDS	280687	281232	+	346	256	332	1324	1883	1730
SL1344_RS01215	yaeJ	WP_000560527.1	CDS	281229	281651	+	423	331	446	1566	1974	2015
SL1344_RS01220	cutF	WP_000252573.1	CDS	281683	282384	+	954	810	885	2615	2930	3484
SL1344_RS01225	proS	WP_001260683.1	CDS	282458	284176	-	5923	4131	6497	5257	5716	5854
SL1344_RS01230	yaeB	WP_000093986.1	CDS	284287	284994	-	1023	665	1106	1607	1584	1710
SL1344_RS01235	rcsF	WP_001202315.1	CDS	284991	285395	-	1241	585	1354	1154	1272	1305
SL1344_RS01240	metQ	WP_000874215.1	CDS	285514	286329	-	7024	5888	5930	10048	9301	10379
ncRNA0210	STnc925		sRNA	285917	285972	-	457	283	371	679	706	775
SL1344_RS01245	yaeE	WP_001287486.1	CDS	286368	287021	-	639	491	678	1627	1828	2125
SL1344_RS01250	abc	WP_000594021.1	CDS	287014	288045	-	670	427	810	2128	2566	2693
SL1344_RS01255	yaeD	WP_001051726.1	CDS	288235	288801	+	302	361	309	451	515	564
ncRNA0448	StyR-215a		sRNA	288995	289054	+	493	148	808	986	1037	811
SL1344_RS01260		product=16S ribosomal RNA	rRNA	289168	290723	+	321	4870	485	314	388	475
SL1344_RS01265		290815..290817)	tRNA	290781	290857	+	1363	912	2254	1957	2114	1982
SL1344_RS01270		291000..291002)	tRNA	290967	291042	+	1829	1489	2628	2875	3718	3454
ncRNA0417	StyR-44a		sRNA	291072	291217	+	46	21	66	81	88	96
SL1344_RS01275		product=23S ribosomal RNA	rRNA	291216	294327	+	1179	1451	1379	992	1087	1299
rrf	rrf	RF00001	rRNA	294512	294627	+	6	4	3	4	3	9
SL1344_RS01285		294853..294855)	tRNA	294819	294895	+	140	90	116	144	142	133
SL1344_RS01290	dkgB	WP_000154871.1	CDS	295060	295863	+	362	335	400	470	502	566
SL1344_RS01295	yafC	WP_000648534.1	CDS	295884	296798	-	298	246	283	219	255	250
SL1344_RS01300	SL1344_0252	WP_001127538.1	CDS	296903	298078	+	146	156	113	223	338	268
SL1344_RS01305	yafD	WP_001230968.1	CDS	298210	299010	+	1136	893	1116	1248	1176	1429
SL1344_RS01310	yafE	WP_000207232.1	CDS	299088	299858	+	232	293	240	581	610	743
SL1344_RS01315	dniR	WP_000644706.1	CDS	299914	301281	-	5618	4245	7700	10996	14440	12102
SL1344_RS01320	gloB	WP_001052775.1	CDS	301353	302108	-	510	479	471	517	599	640
SL1344_RS01325	yafS	WP_000801238.1	CDS	302143	302865	+	354	372	334	395	428	522
SL1344_RS01330	rnhA	WP_000917872.1	CDS	302862	303329	-	354	278	311	635	609	690
SL1344_RS01335	dnaQ	WP_000131352.1	CDS	303384	304124	+	1260	1093	1298	1721	1988	2198
SL1344_RS01340		304292..304294)	tRNA	304258	304334	+	812	800	669	394	470	613
SL1344_RS01345	sciA	WP_000367626.1	CDS	304656	305711	-	108	105	90	176	197	214
SL1344_RS01350	sciB	WP_000145244.1	CDS	305722	306717	-	62	53	61	111	112	139
SL1344_RS01355	sciC	WP_000371510.1	CDS	306714	308597	-	106	125	112	224	269	260
SL1344_RS01360	sciD	WP_000108007.1	CDS	308613	309107	-	38	56	50	89	89	96
SL1344_RS01365	sciE	WP_000750535.1	CDS	309104	309928	-	114	117	128	136	166	156
SL1344_RS01370	sciF	WP_000806681.1	CDS	309915	310817	-	58	60	110	153	159	146
SL1344_RS01375		WP_011233137.1	CDS	310826	310897	-	1	0	6	4	4	4
SL1344_RS01380	sciG	WP_000449778.1	CDS	311185	313824	+	329	396	334	342	358	414
SL1344_RS01385	sciH	WP_000996817.1	CDS	313924	314466	+	90	90	81	70	93	112
SL1344_RS01390	sciI	WP_000013879.1	CDS	314490	315983	+	165	147	166	187	209	192
SL1344_RS01395	sciJ	WP_001526444.1	CDS	316169	316615	+	43	44	41	126	128	131
SL1344_RS01400	sciK	WP_000312802.1	CDS	316869	317354	+	28	28	32	22	27	34
SL1344_RS01405	SL1344_0272	WP_001081550.1	CDS	317659	318144	+	14	13	21	32	36	39
SL1344_RS01410	SL1344_0273	WP_001521649.1	CDS	318180	318512	+	5	9	8	8	20	13
SL1344_RS01415	sciK1	WP_000119443.1	CDS	318655	319140	+	46	23	27	46	49	55
SL1344_RS01420	sciN	WP_001007106.1	CDS	319207	319743	+	14	16	11	12	11	23
SL1344_RS01425	sciO	WP_000118732.1	CDS	319747	321090	+	82	62	80	137	140	163
SL1344_RS01430	sciP	WP_000132483.1	CDS	321087	322391	+	92	98	103	170	164	162
SL1344_RS01435	sciQ	WP_000976553.1	CDS	322396	323169	+	22	33	45	55	79	51
SL1344_RS01440	sciR	WP_000477474.1	CDS	323360	323803	+	15	10	27	25	20	31
SL1344_RS01445	sciS	WP_001168956.1	CDS	323837	327706	+	324	1058	252	803	913	906
SL1344_RS01450	sciT	WP_001254137.1	CDS	327706	328494	+	29	88	41	112	168	177
ncRNA0484	StyR-341		sRNA	328467	328520	-	1	3	0	21	16	17
SL1344_RS01455	sciU	WP_001271468.1	CDS	328521	328907	+	27	33	23	61	76	73
SL1344_RS01460	sciV	WP_001518421.1	CDS	328934	329452	+	45	62	55	108	153	132
SL1344_RS01465	vgrS	WP_000011535.1	CDS	329849	332038	+	166	155	128	226	278	239
SL1344_RS01470	sciW	WP_000375832.1	CDS	332062	332508	+	23	28	21	20	40	28
SL1344_RS01475	SL1344_0286	WP_000272655.1	CDS	332527	336123	+	355	615	376	845	1118	1231
SL1344_RS01480	SL1344_0286A	WP_000932531.1	CDS	336117	336380	+	381	280	404	377	537	558
SL1344_RS01485		WP_023139295.1	CDS	336540	337313	+	262	514	330	1057	1463	1638
SL1344_RS01490	sciX	WP_000935097.1	CDS	337307	337753	+	209	235	214	529	597	671
SL1344_RS01495		WP_000943619.1	CDS	338316	338753	+	40	49	42	61	43	64
SL1344_RS01500		WP_000994224.1	CDS	338806	339081	-	4	2	3	4	7	13
ncRNA0026	IsrA		sRNA	338816	339238	+	16	4	7	12	20	13
SL1344_RS01505	SL1344_0291	WP_000245823.1	CDS	339579	339830	+	20	35	42	102	105	132
SL1344_RS01515		WP_001224073.1	CDS	340233	340430	+	40	21	33	81	118	104
SL1344_RS01520		WP_001541869.1	CDS	340656	340937	+	5	4	4	13	16	23
SL1344_RS01525	safA	WP_000835839.1	CDS	341699	342199	+	183	273	217	338	349	423
SL1344_RS01530	safB	WP_001535430.1	CDS	342283	343020	+	46	81	44	109	87	113
SL1344_RS01535	safC	WP_000669634.1	CDS	343044	345554	+	353	490	297	414	551	623
SL1344_RS01540	safD	WP_000266939.1	CDS	345576	346046	+	58	67	53	121	149	180
SL1344_RS01545	ybeJ	WP_000119390.1	CDS	346452	347273	+	112	156	80	542	713	622
SL1344_RS01550		WP_001550229.1	CDS	347353	347613	+	48	216	38	293	371	298
SL1344_RS01560	sinR	WP_000970302.1	CDS	348088	349035	+	1931	2633	1594	742	844	837
SL1344_RS01565	SL1344_0301	WP_001575654.1	CDS	349152	349367	+	66	61	69	32	20	24
SL1344_RS01570	pagN	WP_000787603.1	CDS	349371	350090	-	762	849	746	13787	21738	19565
SL1344_RS01575	sciZ	WP_000788200.1	CDS	350421	350828	-	244	252	247	949	1094	1255
ncRNA0216	STnc1030		sRNA	350913	351102	+	61	61	54	52	67	75
ncRNA0217	STnc1040		sRNA	350914	351100	-	19	6	4	81	107	110
SL1344_RS01580	yafV	WP_000015789.1	CDS	351199	351966	-	851	856	698	1293	1429	1643
SL1344_RS01585	fadE	WP_000973041.1	CDS	352075	354519	-	3288	2962	846	1499	1722	1716
SL1344_RS01590	gmhA	WP_000284051.1	CDS	354759	355337	+	2454	2049	2331	1585	1604	1935
SL1344_RS01595	yafJ	WP_000333387.1	CDS	355550	356317	+	1407	1535	1302	1428	1540	1701
SL1344_RS01600	yafK	WP_001225658.1	CDS	356288	357028	-	975	483	1199	1834	2172	2081
SL1344_RS01605	dbh	WP_001226198.1	CDS	357278	358333	+	701	703	681	837	829	778
SL1344_RS01610		WP_001740586.1	CDS	358552	359526	+	125	196	173	224	265	230
SL1344_RS01615	prfH	WP_000602086.1	CDS	359681	360295	+	177	197	182	221	291	273
SL1344_RS01620	pepD	WP_001292977.1	CDS	360451	361908	-	9552	8404	9331	6952	7631	8550
SL1344_RS01625	gpt	WP_001292018.1	CDS	362157	362615	+	940	341	1047	1317	1510	1346
SL1344_RS01630	frsA	WP_000189588.1	CDS	362704	363948	+	2595	2684	2333	2947	3127	3301
SL1344_RS01635	crl	WP_000174696.1	CDS	364006	364407	+	1480	1801	1240	1967	2186	2680
SL1344_RS01640	phoE	WP_001043675.1	CDS	364458	365510	-	199	129	216	275	330	291
SL1344_RS01645	proB	WP_001285275.1	CDS	365793	366896	+	1562	1478	1730	2598	2844	3023
SL1344_RS01650	proA	WP_000893231.1	CDS	366908	368158	+	4553	4110	4239	4295	4751	5134
SL1344_RS01655		368307..368309)	tRNA	368274	368349	+	682	747	497	596	646	603
SL1344_RS01660	SL1344_0319	WP_000881469.1	CDS	368675	369475	-	39	32	28	59	75	70
SL1344_RS01665		WP_001541905.1	CDS	369474	369746	+	3	6	10	22	12	15
SL1344_RS01670		WP_001541906.1	CDS	369730	370107	+	25	25	19	45	50	34
SL1344_RS01675	SL1344_0322	WP_001141638.1	CDS	370241	370540	+	9870	8566	8835	944	902	1082
SL1344_RS01680	SL1344_0323	WP_001518021.1	CDS	370887	372119	+	58	62	54	59	62	60
SL1344_RS01685	leuC2	gbkey=CDS	CDS	372251	373672	+	93	102	94	91	92	111
SL1344_RS01690	leuD2	WP_000379343.1	CDS	373674	374300	+	27	25	14	34	47	36
SL1344_RS01695	SL1344_0326	WP_000780210.1	CDS	374315	375193	+	90	375	92	257	304	328
SL1344_RS01700	SL1344_0327	WP_000105593.1	CDS	375193	376107	+	187	191	173	417	514	568
ncRNA0309	STnc3270		sRNA	376115	376194	+	37	25	39	61	73	99
SL1344_RS01705	SL1344_0328	WP_000859023.1	CDS	376141	377106	+	443	333	427	852	883	985
SL1344_RS01710	SL1344_0329	WP_001675688.1	CDS	377051	377323	-	67	125	82	63	95	90
SL1344_RS01715	SL1344_0330	WP_000766837.1	CDS	378014	378412	+	45	33	28	62	59	74
SL1344_RS01720	stbE	WP_001247039.1	CDS	378459	379217	-	95	62	75	238	337	285
SL1344_RS01725	stbD	WP_000899100.1	CDS	379183	380508	-	73	65	76	413	565	471
SL1344_RS01730	stbC	WP_000075343.1	CDS	380513	383080	-	114	141	119	280	349	325
SL1344_RS01735	stbB	WP_000781488.1	CDS	383064	383825	-	5	3	6	8	16	13
SL1344_RS01740	stbA	WP_000062035.1	CDS	383887	384423	-	3	3	4	8	4	3
SL1344_RS01745	SL1344_0336	WP_001006010.1	CDS	385087	385821	+	436	463	400	246	285	313
SL1344_RS01750	SL1344_0337	WP_001539242.1	CDS	385794	386294	+	157	175	154	162	183	172
ncRNA0265	STnc1700		sRNA	386380	386476	+	19	16	9	26	22	22
SL1344_RS01755	SL1344_0338	WP_001520747.1	CDS	386618	388168	+	377	405	320	675	815	850
SL1344_RS01760	SL1344_0339	WP_000081378.1	CDS	388268	389011	+	328	411	334	415	511	613
SL1344_RS01765	SL1344_0340	WP_000545421.1	CDS	388984	389472	+	200	264	216	428	407	459
SL1344_RS01770	SL1344_0341	WP_000830238.1	CDS	389874	390398	+	19	9	9	16	23	24
SL1344_RS01775	SL1344_0342	WP_000610820.1	CDS	390542	391183	+	18	19	13	25	25	30
SL1344_RS01780	SL1344_0343	WP_000737127.1	CDS	391194	391418	+	20	17	14	37	34	34
SL1344_RS01785	SL1344_0344	WP_000722978.1	CDS	391476	391835	+	98	134	88	174	237	224
SL1344_RS01790	SL1344_0345	WP_001521068.1	CDS	391905	393362	-	48	46	52	83	81	113
SL1344_RS01795	SL1344_0346	WP_000673160.1	CDS	393379	396546	-	90	91	74	191	202	205
SL1344_RS01800	SL1344_0347	WP_001254844.1	CDS	396543	397769	-	24	19	15	44	49	49
SL1344_RS01805	SL1344_0348	WP_000083318.1	CDS	398046	400334	+	146	212	115	288	267	331
SL1344_RS01810	SL1344_0349	WP_001020583.1	CDS	400346	400810	+	117	77	92	115	126	175
SL1344_RS01815	SL1344_0350	WP_001159470.1	CDS	400888	401082	+	227	255	200	222	267	289
SL1344_RS01820		gbkey=CDS	CDS	401126	401239	-	131	66	33	96	85	100
SL1344_RS01825	SL1344_0351	WP_000288496.1	CDS	401375	402628	+	990	753	262	1033	784	965
SL1344_RS01830	mod	WP_000910371.1	CDS	402817	404775	+	962	944	1064	1045	1151	1160
SL1344_RS01835	res	WP_001023581.1	CDS	404788	407757	+	2704	2251	2781	2250	2333	2566
SL1344_RS01840	SL1344_0354	WP_000934834.1	CDS	408034	408135	+	161	164	69	1965	2069	3023
SL1344_RS01845	SL1344_0355	WP_000393711.1	CDS	408252	409655	+	267	559	159	3879	4118	6254
SL1344_RS01850	SL1344_0356	WP_000151047.1	CDS	409652	410662	+	544	1082	349	4046	4385	5909
SL1344_RS01855		WP_000241458.1	CDS	410662	410793	+	121	189	50	1007	1095	1538
SL1344_RS01860	SL1344_0358	WP_000074605.1	CDS	410999	412003	+	290	363	254	10685	11927	12170
SL1344_RS01865	foxA	WP_001526309.1	CDS	412167	414257	+	241	199	224	4554	4581	4885
SL1344_RS01870	yahN	WP_000433131.1	CDS	414298	414930	-	1081	1276	1087	626	682	664
SL1344_RS01875	yahO	WP_000848026.1	CDS	415162	415437	+	6611	7217	2916	12038	11312	16565
SL1344_RS01880	prpR	WP_000205278.1	CDS	415573	417198	-	2065	1184	652	293	327	298
SL1344_RS01885	prpB	WP_000052224.1	CDS	417463	418350	+	134	170	26	84	99	102
ncRNA0310	STnc3280		sRNA	418336	418463	-	45	30	37	77	99	85
SL1344_RS01890	prpC	WP_000132749.1	CDS	418473	419642	+	149	189	85	129	140	181
SL1344_RS01895	prpD	WP_000107071.1	CDS	419682	421133	+	194	280	108	154	127	159
SL1344_RS01900	prpE	WP_000010229.1	CDS	421174	423060	+	200	434	167	265	346	302
SL1344_RS01905	hemB	WP_000130724.1	CDS	423164	424138	-	3488	3143	3581	2965	2914	3150
SL1344_RS01910	yaiU	WP_000556518.1	CDS	424651	427587	+	589	722	680	2470	3483	3361
SL1344_RS01915	yaiV	WP_000950242.1	CDS	427673	428296	+	139	189	157	191	270	276
SL1344_RS01920	ampH	WP_000830784.1	CDS	428341	429498	-	344	256	348	807	1068	1065
SL1344_RS01925	sbmA	WP_000477024.1	CDS	429845	431065	+	262	372	325	771	1032	1034
SL1344_RS01930	yaiW	WP_001271421.1	CDS	431080	432174	+	252	374	257	497	610	632
SL1344_RS01935	yaiY	WP_000763139.1	CDS	432212	432520	-	341	219	203	513	661	638
SL1344_RS01940	yaiZ	WP_001239243.1	CDS	432788	433003	+	1616	1986	1505	672	695	704
SL1344_RS01945	ddlA	WP_001096588.1	CDS	433029	434123	-	2300	1450	2329	1996	1992	2206
SL1344_RS01950	SL1344_0376	WP_000480794.1	CDS	434201	434914	+	135	219	94	447	482	627
SL1344_RS01955	SL1344_0377	WP_000446768.1	CDS	435083	436294	+	107	82	102	421	419	510
SL1344_RS01960	yaiB	WP_001518423.1	CDS	436591	436851	+	9094	7301	7340	21324	26826	25106
ncRNA0365	STnc4150		sRNA	436949	437082	-	4	0	1	11	11	9
SL1344_RS01965	psiF	WP_000705165.1	CDS	437203	437523	+	890	886	460	4291	4784	6275
SL1344_RS01970	adrA	WP_000484086.1	CDS	437615	438727	+	332	487	237	1767	1886	2353
SL1344_RS01975	proC	WP_000412195.1	CDS	438742	439551	-	3564	4059	3007	3076	3043	3583
SL1344_RS01980	yaiI	WP_000158137.1	CDS	439691	440146	+	267	317	290	348	386	435
SL1344_RS01985	aroL	WP_000983569.1	CDS	440331	440876	+	669	708	757	2540	2657	2751
SL1344_RS01990	yaiA	WP_001143163.1	CDS	440903	441094	+	1246	1193	913	5460	5733	7207
ncRNA0442	StyR-169		sRNA	441095	441126	+	308	289	235	1331	1221	1540
SL1344_RS01995	aroM	WP_001276437.1	CDS	441345	442022	+	814	932	712	3410	3537	3745
SL1344_RS02000	yaiE	WP_000941952.1	CDS	442093	442377	+	1656	1636	1534	2884	3037	3311
SL1344_RS02005	rdgC	WP_000964305.1	CDS	442415	443326	-	996	747	1080	1215	1575	1515
SL1344_RS02010	yajF	WP_001219263.1	CDS	443452	444360	+	604	760	450	672	737	820
SL1344_RS02015	araJ	WP_000755620.1	CDS	444382	445554	-	217	266	276	501	601	524
SL1344_RS02020	sbcC	WP_001526312.1	CDS	445727	448867	-	1453	1247	1423	1485	1538	1546
SL1344_RS02025	sbcD	WP_001221261.1	CDS	448864	450066	-	354	245	393	476	558	531
SL1344_RS02030		WP_001249030.1	CDS	450108	450239	-	5	2	5	19	14	10
SL1344_RS02035	phoB	WP_000113921.1	CDS	450281	450970	+	1090	1429	1127	5248	7911	6566
SL1344_RS02040	phoR	WP_000893645.1	CDS	451040	452335	+	831	847	868	4073	5543	4894
SL1344_RS02045	brnQ	WP_000149625.1	CDS	452744	454063	+	1948	2079	2055	3526	3962	4100
SL1344_RS02050	proY	WP_001555879.1	CDS	454138	455508	+	941	785	978	1533	1733	1784
SL1344_RS02055	malZ	WP_000930727.1	CDS	455670	457487	+	187	276	201	535	656	714
SL1344_RS02060	tsaA	WP_000244731.1	CDS	457559	458161	-	14832	13499	12198	9915	11112	12877
SL1344_RS02065	yajB	WP_001009858.1	CDS	458371	458952	-	1539	1690	1675	2305	2429	2698
SL1344_RS02070	queA	WP_001266530.1	CDS	459046	460110	+	511	361	641	616	754	756
SL1344_RS02075	tgt	WP_000667305.1	CDS	460307	461434	+	3200	2543	3760	2414	2502	2615
SL1344_RS02080	yajC	WP_000007628.1	CDS	461457	461789	+	4585	4117	4988	2746	3096	3101
SL1344_RS02085	secD	WP_001541956.1	CDS	461850	463664	+	7756	6534	8279	6383	6938	7560
SL1344_RS02090	secF	WP_000046629.1	CDS	463675	464646	+	3009	3065	2987	3072	3950	4246
SL1344_RS02095	SL1344_0404	WP_000793035.1	CDS	464794	465159	+	199	214	199	568	656	665
SL1344_RS02100	SL1344_0405	WP_000198318.1	CDS	465185	465877	+	177	231	159	517	590	576
SL1344_RS02105	yajD	WP_000974818.1	CDS	466047	466394	+	635	603	678	766	961	908
ncRNA0057	RdlE		sRNA	466718	466783	-	594	153	274	213	143	85
SL1344_RS02110		WP_000176312.1	CDS	466832	466939	+	5592	4059	3918	3770	4042	4623
SL1344_RS02115	tsx	WP_000752021.1	CDS	467023	467886	-	3211	5383	4119	713	938	829
SL1344_RS02120	yajI	WP_000198484.1	CDS	468186	468725	-	224	282	134	323	291	330
SL1344_RS02125	nrdR	WP_000543533.1	CDS	468877	469326	+	1240	1070	1433	3917	5312	4583
SL1344_RS02130	ribD	WP_001150216.1	CDS	469330	470433	+	1817	2082	1669	8921	11177	10463
SL1344_RS02135	ribH	WP_001021372.1	CDS	470522	470992	+	1490	2049	1717	2306	3048	2833
SL1344_RS02140	nusB	WP_000801129.1	CDS	471013	471432	+	3647	3082	4120	6385	8089	8084
SL1344_RS02145	thiL	WP_000752138.1	CDS	471511	472488	+	453	679	451	985	1235	1355
SL1344_RS02150	pgpA	WP_000154063.1	CDS	472466	472981	+	444	513	448	1087	1473	1426
SL1344_RS02155	yajO	WP_001199859.1	CDS	473085	474059	-	933	1253	685	1690	1727	2263
SL1344_RS02160	dxs	WP_000006777.1	CDS	474116	475978	-	2415	2377	2643	2242	2397	2677
SL1344_RS02165	ispA	WP_000348074.1	CDS	476002	476901	-	1585	1321	1732	2473	2648	2704
SL1344_RS02170	xseB	WP_001124944.1	CDS	476902	477144	-	1000	736	1050	1051	1180	1169
SL1344_RS02175	thiI	WP_000668709.1	CDS	477354	478802	+	618	417	713	953	1102	1185
SL1344_RS02180	phnV	WP_000909791.1	CDS	478846	479643	-	84	89	89	170	199	201
SL1344_RS02185	phnU	WP_000052716.1	CDS	479646	480506	-	55	49	42	75	71	95
SL1344_RS02190	phnT	WP_000928801.1	CDS	480509	481618	-	85	96	95	142	216	176
SL1344_RS02195	phnS	WP_000778012.1	CDS	481624	482637	-	88	92	100	141	146	152
SL1344_RS02200	phnR	WP_000836268.1	CDS	482835	483554	-	388	438	414	376	482	497
SL1344_RS02205	phnW	WP_000203955.1	CDS	483694	484797	+	53	522	50	229	302	280
SL1344_RS02210	phnX	WP_001526311.1	CDS	484807	485616	+	35	39	35	202	199	184
ncRNA0511	RUF_107c.30		sRNA	485618	485703	+	8	6	4	28	26	24
SL1344_RS02215	thiJ	WP_001275806.1	CDS	485713	486303	-	1089	1068	901	1420	1470	1701
SL1344_RS02220	apbA	WP_000705816.1	CDS	486266	487177	-	564	619	611	916	1144	1278
ncRNA0478	StyR-322		sRNA	486531	486701	+	11	3	12	20	27	21
SL1344_RS02225	yajQ	WP_001138913.1	CDS	487303	487794	+	2040	2010	2190	1799	2351	2568
SL1344_RS02230	yajR	WP_001000938.1	CDS	487841	489205	-	894	849	846	1240	1598	1497
SL1344_RS02235	SL1344_0431	WP_000403151.1	CDS	489742	491253	+	165	183	167	385	443	445
SL1344_RS02240	SL1344_0432	WP_000595924.1	CDS	491265	492758	+	222	351	190	389	365	407
SL1344_RS02245	cyoE	WP_001519400.1	CDS	492840	493727	-	11397	22628	8329	8630	8755	9739
SL1344_RS02250	cyoD	WP_000019878.1	CDS	493742	494071	-	4068	7040	2580	1917	2100	2440
SL1344_RS02255	cyoC	WP_000179833.1	CDS	494071	494685	-	6905	9277	3257	2739	2918	3375
SL1344_RS02260	cyoB	WP_000467158.1	CDS	494675	496666	-	33288	30684	11890	11434	12028	13386
SL1344_RS02265	cyoA	WP_001239449.1	CDS	496677	497633	-	37200	25883	10924	10693	10419	11637
ncRNA0218	STnc1065		sRNA	497375	497538	-	6850	4837	1914	1892	1863	1952
SL1344_RS02270	ampG	WP_000098481.1	CDS	498086	499561	-	1416	1302	1561	1401	1389	1450
SL1344_RS02275	yajG	WP_001537832.1	CDS	499605	500183	-	2220	864	1981	1438	1582	1545
SL1344_RS02280	bolA	WP_000973433.1	CDS	500487	500804	+	7210	8719	4265	11007	11761	15878
SL1344_RS02285	tig	WP_001198406.1	CDS	501151	502449	+	29962	16676	28373	12786	13775	14447
SL1344_RS02290	clpP	WP_000122257.1	CDS	502696	503319	+	6089	5000	5979	4793	5324	5749
SL1344_RS02295	clpX	WP_000130314.1	CDS	503571	504842	+	21358	14222	18718	26096	26636	33080
ncRNA0078	SraA		sRNA	504869	504976	-	13	10	12	12	16	16
SL1344_RS02300	lon	WP_001067723.1	CDS	505028	507382	+	17430	16505	19397	22141	26363	28046
SL1344_RS02305	hupB	WP_001043544.1	CDS	507591	507863	+	71162	120433	74379	20538	22577	24345
SL1344_RS02310	cypD	WP_000969434.1	CDS	508154	510025	+	2678	2672	2795	4706	6272	6715
SL1344_RS02315	comE1	WP_000680322.1	CDS	510175	510549	+	40	161	43	34	30	43
SL1344_RS02320	ybaW	WP_001194543.1	CDS	510653	511051	+	304	364	171	691	787	863
SL1344_RS02325	ybaX	WP_000817201.1	CDS	511157	511852	-	512	683	501	843	949	997
SL1344_RS02330	ybaE	WP_001238163.1	CDS	511917	513617	-	458	419	392	271	273	303
SL1344_RS02335	cof	WP_000113030.1	CDS	513718	514536	+	243	211	205	203	227	259
ncRNA0211	STnc930		sRNA	514486	514580	+	20	10	13	19	14	21
SL1344_RS02340	SL1344_0452	WP_001682220.1	CDS	514586	515638	-	200	255	195	353	390	362
SL1344_RS02345	ybaO	WP_000884594.1	CDS	515754	516212	+	775	812	843	911	868	866
SL1344_RS02350	mdlA	WP_001235572.1	CDS	516253	518025	+	830	976	839	1268	1310	1386
SL1344_RS02355	mdlB	WP_001256070.1	CDS	518018	519799	+	780	1094	891	1376	1454	1482
SL1344_RS02360	glnK	WP_000780341.1	CDS	520012	520350	+	15	8	11	17	17	34
SL1344_RS02365	amtB	WP_000684912.1	CDS	520382	521668	+	136	234	136	233	284	289
SL1344_RS02370	tesB	WP_000084180.1	CDS	521768	522628	-	1016	869	893	1691	1746	1991
SL1344_RS02375	ybaY	WP_000779803.1	CDS	522843	523412	+	6394	5838	2888	8454	8945	11832
SL1344_RS02380	ybaZ	WP_001672610.1	CDS	523445	523756	-	252	233	266	375	478	427
ncRNA0014	Ffs		sRNA	523911	524024	+	4393	8305	3959	1531	1526	2721
SL1344_RS24775		RF00169	ncRNA	523919	524015	+	4382	8276	3947	1525	1508	2716
SL1344_RS02385	ylaB	WP_000213137.1	CDS	524065	525615	-	718	630	799	1166	1210	1419
SL1344_RS02390	rpmE2	WP_000801415.1	CDS	525840	526100	+	121	131	116	329	386	431
SL1344_RS02395	rpmJa	WP_001197749.1	CDS	526106	526246	+	508	966	426	969	1062	1093
SL1344_RS02400	ylaC	WP_000136181.1	CDS	526302	526772	-	1943	1720	2129	3342	3748	4057
SL1344_RS02405	maa	WP_001278792.1	CDS	526889	527440	-	987	802	923	2582	2503	2960
SL1344_RS02410	hha	WP_001280991.1	CDS	527619	527837	-	1593	1271	1468	2518	2691	3226
SL1344_RS02415	ybaJ	WP_000344807.1	CDS	527865	528239	-	2554	1416	2101	3758	3889	4788
SL1344_RS02420	acrB	WP_001132508.1	CDS	528735	531884	-	13727	11764	11325	14250	14046	17279
SL1344_RS02425	acrA	WP_001039202.1	CDS	531907	533100	-	5164	3738	4214	6191	6429	7546
SL1344_RS02430	acrR	WP_000101755.1	CDS	533242	533895	+	1220	1057	1306	953	1104	1164
SL1344_RS02435	aefA	WP_000178249.1	CDS	534014	537376	+	1866	1778	2145	3822	4213	4462
SL1344_RS02440	SL1344_0472	WP_000440523.1	CDS	537418	538353	-	983	1127	920	1527	1902	1960
SL1344_RS02445	ybaM	WP_000051161.1	CDS	538423	538590	-	228	244	166	632	723	737
SL1344_RS02450	priC	WP_001738050.1	CDS	538604	539131	-	323	309	239	1082	1306	1276
SL1344_RS02455		WP_001189860.1	CDS	539200	539577	+	130	138	124	1857	2283	2267
SL1344_RS02460	apt	WP_000127350.1	CDS	539730	540281	+	320	271	373	2083	2401	2573
SL1344_RS02465	dnaX	WP_000121962.1	CDS	540395	542323	+	2700	2706	2698	4562	4642	5030
SL1344_RS02470	ybaB	WP_000467098.1	CDS	542369	542698	+	3579	2098	3184	3438	3481	3797
SL1344_RS02475	recR	WP_001195023.1	CDS	542698	543303	+	3817	2397	3273	5083	4963	5085
SL1344_RS02480	htpG	WP_001520210.1	CDS	543414	545288	+	23512	14331	29675	9640	10449	12042
ncRNA0510	RUF_107c.26		sRNA	545301	545385	-	13	10	21	27	29	46
SL1344_RS02485	adk	WP_001220237.1	CDS	545529	546173	+	5714	3011	6201	2084	2380	2370
SL1344_RS02490	hemH	WP_001250078.1	CDS	546402	547364	+	969	1065	823	1276	1363	1530
SL1344_RS02495	aes	WP_000801786.1	CDS	547361	548332	-	261	179	263	125	101	121
SL1344_RS02500	gsk	WP_000671592.1	CDS	548485	549789	+	297	337	347	740	968	954
SL1344_RS02505	ybaL	WP_000546207.1	CDS	549838	551514	-	4145	5178	3361	5099	6447	5995
SL1344_RS02510	fsr	WP_001251593.1	CDS	551729	552949	-	532	428	516	767	653	859
SL1344_RS02515	ushA	WP_000670396.1	CDS	553122	554774	+	8389	7551	7168	2680	2681	2885
ncRNA0509	RUF_107c.24		sRNA	554741	554803	+	1619	1302	1344	392	407	429
SL1344_RS02520	ybaK	WP_000186618.1	CDS	554891	555370	-	497	431	441	907	946	933
ncRNA0003	ChiX		sRNA	555494	555573	+	1234	469	1519	1658	1404	1940
SL1344_RS02525	ybaP	WP_000421859.1	CDS	555572	556366	-	511	518	457	735	756	825
SL1344_RS02530	SL1344_0490	WP_000488548.1	CDS	556452	557279	-	113	95	124	148	146	140
SL1344_RS02535	copA	WP_000083899.1	CDS	557433	559934	-	2335	2134	1738	1660	1693	2677
SL1344_RS02540	cueR	WP_001026760.1	CDS	560044	560460	+	667	695	599	362	593	536
SL1344_RS02545	ybbJ	WP_000561177.1	CDS	560461	560913	-	718	847	779	574	698	752
SL1344_RS02550	ybbK	WP_000906146.1	CDS	560910	561827	-	886	961	945	727	901	968
SL1344_RS02555	ybbL	WP_000140195.1	CDS	561974	562651	+	348	195	306	241	242	255
SL1344_RS02560	ybbM	WP_001002130.1	CDS	562638	563417	+	436	383	421	352	367	387
ncRNA0508	RUF_107c.23		sRNA	563424	563507	-	643	229	770	655	666	641
SL1344_RS02565	ybbN	WP_000116058.1	CDS	563503	564357	-	4601	2697	5471	4748	5168	5358
SL1344_RS02570	ybbO	WP_001172802.1	CDS	564417	565187	-	744	520	662	1138	1175	1329
SL1344_RS02575	tesA	WP_001010574.1	CDS	565342	565956	-	543	277	473	864	855	1027
SL1344_RS02580	ybbA	WP_001110598.1	CDS	565927	566613	+	316	425	186	521	640	708
SL1344_RS02585	ybbP	WP_000561776.1	CDS	566610	569024	+	1140	1646	1027	2040	2516	2560
ncRNA0212	STnc940		sRNA	569013	569075	+	47	47	44	74	79	88
SL1344_RS02590	SL1344_0502	WP_000152869.1	CDS	569210	570343	+	253	284	269	293	336	417
SL1344_RS02595	sfbA	WP_000524317.1	CDS	570600	571430	+	365	304	294	1676	1442	1763
SL1344_RS02600	sfbB	WP_000569660.1	CDS	571467	572483	+	272	314	222	1290	1239	1420
SL1344_RS02605	sfbC	WP_000342247.1	CDS	572476	573135	+	305	403	223	986	991	1187
SL1344_RS02610	ybbB	WP_001154078.1	CDS	573174	574268	-	1432	1634	1823	1321	1412	1435
ncRNA0213	STnc950		sRNA	573181	573240	+	19	22	14	97	110	125
SL1344_RS02615	ybbS	WP_000460169.1	CDS	574338	575264	-	169	130	167	122	145	135
SL1344_RS02620	allA	WP_000764664.1	CDS	575491	575973	+	362	391	362	298	424	349
SL1344_RS02625	allR	WP_000141265.1	CDS	576052	576870	+	1840	1738	1620	1561	1863	1962
SL1344_RS02630	gcl	WP_001096865.1	CDS	576955	578736	+	131	141	117	120	164	158
SL1344_RS02635	gip	WP_000943591.1	CDS	578749	579525	+	69	119	78	106	112	126
SL1344_RS02640	garRa	WP_000765810.1	CDS	579626	580504	+	143	188	133	60	48	46
SL1344_RS02645	SL1344_0513	WP_000005067.1	CDS	580570	581817	+	69	93	82	161	184	185
SL1344_RS02650	allP	WP_000401063.1	CDS	581913	583367	+	64	70	51	52	55	36
SL1344_RS02655	allB	WP_000006865.1	CDS	583446	584807	+	422	429	287	119	136	164
SL1344_RS02660	ybbY	WP_000484503.1	CDS	584866	586164	+	34	59	49	80	124	109
SL1344_RS02665	glxK	WP_000706331.1	CDS	586187	587335	+	96	129	80	114	142	150
ncRNA0169	STnc480		sRNA	587340	587395	-	93	66	99	82	72	107
SL1344_RS02670	ylbA	WP_000540981.1	CDS	587415	588200	-	782	700	731	940	987	1136
SL1344_RS02675	allC	WP_000589769.1	CDS	588211	589446	-	200	266	186	64	78	83
SL1344_RS02680	allD	WP_000703934.1	CDS	589468	590517	-	176	134	154	22	19	12
SL1344_RS02685	fdrA	WP_000580915.1	CDS	590848	592512	+	135	161	95	202	224	232
SL1344_RS02690	ylbE	WP_000495330.1	CDS	592522	593781	+	52	67	58	72	57	76
SL1344_RS02695	ylbF	WP_000821191.1	CDS	593793	594602	+	32	49	40	48	34	38
SL1344_RS02700	arcC	WP_000855337.1	CDS	594606	595499	+	79	103	92	88	123	127
SL1344_RS02705	purK	WP_000815603.1	CDS	595540	596607	-	698	561	731	4283	4676	4630
SL1344_RS02710	purE	WP_000098736.1	CDS	596604	597113	-	156	129	188	2542	3062	2810
SL1344_RS02715	lpxH	WP_000212284.1	CDS	597231	597953	-	2113	816	1739	1835	1641	2031
SL1344_RS02720	ppiB	WP_000255991.1	CDS	597956	598450	-	9537	4045	8188	7546	7549	8824
SL1344_RS02725	cysS	WP_000912376.1	CDS	598623	600008	+	3048	2285	3039	2383	2646	2651
SL1344_RS02730	SL1344_0531	WP_000819114.1	CDS	600052	600876	-	251	219	233	450	661	527
SL1344_RS02735	SL1344_0532	WP_001038573.1	CDS	600873	601310	-	194	121	192	107	133	110
SL1344_RS02740	ybcI	WP_001143507.1	CDS	601303	601848	-	101	68	68	69	85	84
SL1344_RS02745	ybcJ	WP_000190278.1	CDS	601976	602188	-	902	631	1014	1597	1692	1834
SL1344_RS02750	folD	WP_000729167.1	CDS	602190	603056	-	1431	1286	1534	2549	2835	2891
SL1344_RS02755	fimA	WP_000681030.1	CDS	603603	604160	+	633	714	763	159	134	143
ncRNA0104	fimA-trailer		sRNA	604162	604211	+	198	212	233	35	23	24
SL1344_RS02760	fimI	WP_000619606.1	CDS	604236	604769	+	104	211	128	34	33	37
SL1344_RS02765	fimC	WP_000935025.1	CDS	604813	605505	+	81	84	91	38	15	20
SL1344_RS02770	fimD	WP_000754233.1	CDS	605536	608148	+	172	182	200	198	284	250
SL1344_RS02775	fimH	WP_000708653.1	CDS	608163	609170	+	135	114	125	157	194	170
SL1344_RS02780	fimF	WP_000603405.1	CDS	609180	609698	+	109	78	92	283	290	315
SL1344_RS02785	fimZ	WP_000801273.1	CDS	609744	610376	-	55	36	63	59	28	30
ncRNA0129	sRNA32		sRNA	610437	610589	-	7	10	8	18	9	11
SL1344_RS02790	fimY	WP_001258122.1	CDS	610980	611702	-	13	11	12	20	22	17
SL1344_RS02795	SL1344_0544	WP_000226489.1	CDS	611721	612032	-	13	15	17	7	20	15
SL1344_RS02800	fimW	WP_000944156.1	CDS	612194	612790	-	75	64	67	89	115	91
SL1344_RS02805		613080..613082)	tRNA	613046	613122	+	33	24	68	222	215	243
SL1344_RS24780		gbkey=CDS	CDS	613144	613350	-	132	115	111	172	248	202
SL1344_RS02815	SL1344_0547	WP_000247905.1	CDS	614292	615932	-	83	72	78	106	115	91
SL1344_RS02820	gtrBa	WP_000703614.1	CDS	615925	616851	-	73	23	57	101	91	92
SL1344_RS02825	gtrAa	WP_000915523.1	CDS	616848	617210	-	19	10	16	61	38	31
ncRNA0270	STnc1870		sRNA	617317	617426	+	1	1	1	8	9	6
SL1344_RS02830		gbkey=CDS	CDS	617633	617878	-	7	11	11	29	27	40
SL1344_RS02835		WP_000946038.1	CDS	618078	618407	-	6	8	11	21	24	17
SL1344_RS02840		WP_000215115.1	CDS	618531	618695	+	120	298	123	413	519	479
SL1344_RS02845	ykgD	WP_000339633.1	CDS	618746	619600	-	260	235	276	165	198	222
SL1344_RS02850	ykgC	WP_000195929.1	CDS	619816	621141	+	175	162	131	230	266	274
SL1344_RS02855	SL1344_0553	WP_000922170.1	CDS	621298	621534	+	11	8	6	9	15	13
SL1344_RS02860	ykgB	WP_000362180.1	CDS	621547	622107	+	37	44	36	36	65	45
SL1344_RS02865	SL1344_0555	WP_001033457.1	CDS	622186	623361	-	1429	1374	1444	845	1014	1008
SL1344_RS02870	pheP	WP_000786288.1	CDS	623687	625081	+	649	654	730	985	1276	1197
SL1344_RS02875	ybdG	WP_001156978.1	CDS	625123	626370	-	1600	1065	1258	1078	1301	1202
SL1344_RS02880	apeE	WP_000192437.1	CDS	626681	628651	+	906	1168	567	1259	1597	1607
SL1344_RS02885	SL1344_0559	WP_001031461.1	CDS	628818	631547	+	1254	1346	1272	1025	1169	1253
SL1344_RS02890	SL1344_0560	WP_000109360.1	CDS	631675	632661	-	74	44	51	55	71	65
SL1344_RS02895	SL1344_0561	WP_001195685.1	CDS	632728	633789	-	48	56	27	52	62	56
SL1344_RS02900	manZ	WP_000005803.1	CDS	633804	634658	-	37	20	30	46	75	82
SL1344_RS02905	manY	WP_000927523.1	CDS	634661	635404	-	19	16	27	27	18	15
SL1344_RS02910	manX	WP_000594176.1	CDS	635419	635889	-	20	8	12	14	17	18
SL1344_RS02915	SL1344_0565	WP_001216659.1	CDS	635867	636316	-	16	6	6	16	16	13
SL1344_RS02920	nfnB	WP_000355879.1	CDS	636516	637169	-	2072	1101	1852	1288	1158	1442
SL1344_RS02925	ybdF	WP_000348999.1	CDS	637266	637634	-	279	225	290	314	330	378
SL1344_RS02930	ramR	WP_000113609.1	CDS	637634	638215	-	673	519	682	677	741	792
ncRNA0406	StyR-3		sRNA	638338	638481	+	138	191	168	63	95	54
SL1344_RS02935	ramA	WP_000155631.1	CDS	638504	638845	+	162	150	142	106	166	187
SL1344_RS02940	ybdJ	WP_000682497.1	CDS	638851	639099	-	166	125	95	420	368	485
SL1344_RS02945	ybdK	WP_001196903.1	CDS	639166	640284	-	228	329	124	2077	2072	2390
ncRNA0444	StyR-178		sRNA	639906	639939	+	0	1	0	5	2	1
SL1344_RS02950	entD	WP_000958064.1	CDS	640296	641000	-	22	15	19	1897	1674	1863
SL1344_RS02955	fepA	WP_001034955.1	CDS	641046	643301	-	236	241	263	25939	23794	26257
SL1344_RS02960	fes	WP_000656600.1	CDS	643490	644704	+	72	87	44	12490	12667	14924
SL1344_RS02965	ybdZ	WP_000396006.1	CDS	644735	644953	+	6	20	8	2684	2600	3162
SL1344_RS02970	entF	WP_000194140.1	CDS	644950	648834	+	314	359	329	29416	27273	33124
SL1344_RS02975	fepE	WP_001139583.1	CDS	649084	650220	+	685	582	810	1629	1732	1870
SL1344_RS02980	fepC	WP_000140620.1	CDS	650273	651067	-	36	15	23	621	548	677
SL1344_RS02985	fepG	WP_001539406.1	CDS	651064	652056	-	68	100	66	922	732	896
SL1344_RS02990	fepD	WP_001277880.1	CDS	652053	653060	-	29	24	42	1383	1288	1382
SL1344_RS02995	ybdA	WP_001081661.1	CDS	653171	654415	+	93	116	67	932	951	1020
SL1344_RS03000	fepB	WP_001238988.1	CDS	654478	655434	-	88	63	75	2559	2674	3118
SL1344_RS03005	entC	WP_000367601.1	CDS	655743	656918	+	74	62	57	6842	4636	6237
SL1344_RS03010	entE	WP_001222445.1	CDS	656928	658538	+	131	113	138	8097	5394	7387
SL1344_RS03015	entB	WP_001007166.1	CDS	658552	659409	+	117	120	102	6052	4158	5790
SL1344_RS03020	entA	WP_000145522.1	CDS	659409	660164	+	71	92	80	3754	2692	3950
SL1344_RS03025	ybdB	WP_000637965.1	CDS	660167	660580	+	59	62	67	2767	2003	3021
SL1344_RS03030	cstAa	WP_001043109.1	CDS	660762	662867	+	21699	33371	10908	7298	7239	8314
SL1344_RS03035	ybdD	WP_000460619.1	CDS	662931	663128	+	1660	2564	853	836	1004	1029
SL1344_RS03040	ybdH	WP_001016847.1	CDS	663164	664252	-	187	197	207	1403	1932	1837
SL1344_RS03045	ybdL	WP_001245592.1	CDS	664379	665539	+	409	314	485	1886	2486	2457
SL1344_RS03050	ybdM	WP_001164756.1	CDS	665540	666157	-	337	389	266	482	614	644
SL1344_RS03055	ybdN	WP_000118144.1	CDS	666130	667365	-	303	292	253	476	444	482
SL1344_RS03060	ybdO	WP_000002497.1	CDS	667531	668433	-	730	525	596	754	889	883
ncRNA0304	STnc3180		sRNA	668611	668715	+	20	22	19	71	111	86
SL1344_RS03065	dsbG	WP_000597126.1	CDS	668750	669496	-	2656	2049	1649	2308	2310	2719
ncRNA0137	STnc70		sRNA	669616	669786	+	2536	1708	2333	1858	1720	1998
SL1344_RS03070	ahpC	WP_000052802.1	CDS	669937	670500	+	13243	9735	10989	10887	10723	13323
SL1344_RS03075	ahpF	WP_000887644.1	CDS	670742	672307	+	1942	1831	1714	2481	2762	2825
SL1344_RS03080	SL1344_0598	WP_000377438.1	CDS	672639	673199	+	33	46	18	14	31	23
SL1344_RS03085	SL1344_0599	WP_000064328.1	CDS	673192	675471	+	156	191	171	196	222	259
SL1344_RS03090	SL1344_0600	WP_001250381.1	CDS	675468	676025	+	50	63	48	129	198	202
SL1344_RS03095	SL1344_0601	WP_000417097.1	CDS	676025	676792	+	1110	1124	951	1499	1715	1826
SL1344_RS03100	ybdQ	WP_000278499.1	CDS	676860	677288	-	18536	15430	16507	7715	8745	9797
SL1344_RS03105	ybdR	WP_000646113.1	CDS	677511	678749	+	134	233	99	1690	2041	2625
SL1344_RS03110	rnk	WP_000089748.1	CDS	678832	679242	-	707	677	703	597	704	697
ncRNA0113	sRNA10		sRNA	679292	679410	-	725	955	727	4284	4945	5099
SL1344_RS03115	rna	WP_001092580.1	CDS	679477	680283	-	2639	2313	2690	13271	15982	15907
SL1344_RS03120	citT	WP_000059029.1	CDS	680393	681856	-	207	183	258	666	704	745
SL1344_RS03125	citG	WP_000982663.1	CDS	681894	682790	-	11	18	13	28	23	27
SL1344_RS03130	citX	WP_001236063.1	CDS	682762	683313	-	21	21	8	22	16	26
SL1344_RS03135	citF	WP_000192315.1	CDS	683317	684846	-	34	19	28	61	56	51
SL1344_RS03140	citE	WP_000622342.1	CDS	684856	685764	-	23	19	9	30	19	26
SL1344_RS03145	citD	WP_000700679.1	CDS	685761	686057	-	8	6	4	7	2	11
SL1344_RS03150	citC	WP_000467874.1	CDS	686054	687130	-	21	5	7	26	35	28
SL1344_RS03155	citA	WP_001277836.1	CDS	687515	689176	+	213	281	180	540	716	774
SL1344_RS03160	citB	WP_000138788.1	CDS	689145	689825	+	193	263	165	246	258	390
ncRNA0328	STnc3550		sRNA	689832	689990	-	40	29	118	34	46	39
SL1344_RS03165	dcuC	WP_000958610.1	CDS	689879	691264	-	184	113	523	172	198	184
ncRNA0118	sRNA18		sRNA	691416	691466	+	2	4	7	41	26	43
SL1344_RS03170	pagP	WP_001526101.1	CDS	691655	692215	+	603	484	994	6903	8283	7658
SL1344_RS03175	cspE	WP_000034826.1	CDS	692403	692612	+	13041	7291	12802	13377	12270	14333
SL1344_RS03180	ccrB	WP_000939753.1	CDS	692670	693053	-	212	297	231	305	502	484
SL1344_RS03185	SL1344_0619	WP_000495780.1	CDS	693144	693932	+	110	175	92	214	243	307
ncRNA0437	StyR-126		sRNA	693987	694033	+	91	116	77	127	211	217
SL1344_RS03190	tatE	WP_000503938.1	CDS	694061	694264	+	298	318	285	481	671	687
SL1344_RS03195	lipA	WP_000042640.1	CDS	694350	695315	-	4494	2477	3877	3581	3569	4197
SL1344_RS03200	ybeF	WP_001282817.1	CDS	695521	696474	-	256	299	277	898	1050	1243
SL1344_RS03205	lipB	WP_000284009.1	CDS	696776	697417	-	389	255	444	1325	1625	1519
SL1344_RS03210	ybeD	WP_000850547.1	CDS	697517	697780	-	4038	2419	3914	3904	4998	5043
SL1344_RS03215	dacA	WP_000858711.1	CDS	697889	699100	-	2213	1381	2509	3099	3139	3307
SL1344_RS03220	rlpA	WP_001231299.1	CDS	699240	700307	-	1496	1478	1484	1826	2084	2219
SL1344_RS03225	mrdB	WP_000131713.1	CDS	700318	701430	-	759	824	855	1136	1429	1467
SL1344_RS03230	mrdA	WP_000828700.1	CDS	701433	703334	-	1088	785	1206	2002	2124	2157
SL1344_RS03235	ybeA	WP_000776107.1	CDS	703365	703832	-	742	738	805	1460	1556	1625
SL1344_RS03240	ybeB	WP_001161670.1	CDS	703836	704153	-	837	808	893	1358	1485	1455
SL1344_RS03245		WP_001010585.1	CDS	704342	704482	-	95	97	148	292	368	350
SL1344_RS03250	cobC	WP_001241924.1	CDS	704482	705090	-	291	352	284	640	794	782
SL1344_RS03255	cobD	WP_001173255.1	CDS	705187	706281	+	460	601	694	154	180	178
SL1344_RS03260	nadD	WP_001518902.1	CDS	706256	706897	-	374	351	388	831	927	989
SL1344_RS03265	holA	WP_000620491.1	CDS	706899	707930	-	1607	1635	1789	3298	3449	3775
SL1344_RS03270	rlpB	WP_001269947.1	CDS	707930	708520	-	2947	2552	3064	3962	4438	4770
SL1344_RS03275	leuS	WP_001157918.1	CDS	708535	711117	-	8325	6940	8753	11601	12772	12947
SL1344_RS03280	SL1344_0637	WP_000739136.1	CDS	711405	711695	+	12	14	19	28	32	32
SL1344_RS03285	SL1344_0638	WP_001518451.1	CDS	711718	712884	+	59	89	75	156	186	166
SL1344_RS03290	SL1344_0639	WP_000694477.1	CDS	712934	713887	+	163	259	196	176	200	216
SL1344_RS03295	SL1344_0640	WP_001044182.1	CDS	713955	715883	+	1610	1813	1707	1033	1107	1250
SL1344_RS03300	ybeL	WP_001044884.1	CDS	715976	716449	+	1229	2124	1090	1297	1532	1902
SL1344_RS03305	ybeQ	WP_001016626.1	CDS	716488	717483	-	85	104	119	200	335	312
SL1344_RS03310	ybeR	WP_001669181.1	CDS	717608	718315	+	13	38	37	38	59	78
SL1344_RS03315	ybeS	WP_000845203.1	CDS	718312	719745	+	91	141	87	203	223	235
SL1344_RS03320		WP_001738061.1	CDS	719824	720453	+	46	33	24	98	151	148
SL1344_RS03325	ybeV	WP_001017750.1	CDS	720450	721922	+	154	181	155	371	447	529
SL1344_RS03330	hscC	WP_000368034.1	CDS	721944	723623	-	248	459	759	387	401	449
SL1344_RS03335	SL1344_0649	WP_000498891.1	CDS	723699	724937	-	722	1025	914	437	403	446
SL1344_RS03340	rihA	WP_001207419.1	CDS	724969	725904	-	916	1208	875	420	496	487
SL1344_RS03345	gltL	WP_000631369.1	CDS	726021	726746	-	3421	5134	700	634	606	785
SL1344_RS03350	gltK	WP_000272794.1	CDS	726746	727420	-	4428	5388	707	592	493	601
SL1344_RS03355	gltJ	WP_000020930.1	CDS	727420	728160	-	5832	5912	832	948	679	902
ncRNA0085	SroC		sRNA	728173	728327	-	41776	59805	22821	4987	4115	4693
SL1344_RS03360	gltI	WP_001526121.1	CDS	728320	729228	-	71439	78353	24028	8047	6444	7816
SL1344_RS03365	lnt	WP_001575804.1	CDS	729583	731121	-	2309	1911	2571	4394	4156	5089
SL1344_RS03370	ybeX	WP_001278615.1	CDS	731141	732019	-	3646	2730	3688	6031	6041	7237
ncRNA0507	RUF_107c.18		sRNA	731995	732186	+	31	38	32	76	66	65
SL1344_RS03375	ybeY	WP_000084476.1	CDS	732177	732650	-	2392	2149	2537	3374	3499	4240
SL1344_RS03380	phoL	WP_001018045.1	CDS	732647	733693	-	4102	2977	4203	5509	5531	6529
SL1344_RS03385	miaB	WP_001519200.1	CDS	733898	735322	-	2954	1577	2862	4804	6331	5685
SL1344_RS03390	ubiF	WP_000184633.1	CDS	735466	736641	+	1438	1832	1486	1816	2102	2315
SL1344_RS03395	SL1344_0661	WP_001109079.1	CDS	736708	737283	-	81	66	119	142	145	169
SL1344_RS03400		complement(737459..737461))	tRNA	737419	737493	-	522	243	671	1560	1725	1594
SL1344_RS03405		complement(737577..737579))	tRNA	737537	737611	-	1077	455	1431	1977	2602	2160
SL1344_RS03410		complement(737698..737700))	tRNA	737658	737734	-	1245	502	1919	2781	3802	3212
SL1344_RS03415		complement(737790..737792))	tRNA	737750	737824	-	1662	723	2402	4476	5459	4700
SL1344_RS03420		complement(737900..737902))	tRNA	737860	737934	-	2532	1552	3765	7123	8512	7625
SL1344_RS03425		complement(738006..738008))	tRNA	737958	738042	-	5412	5740	5936	7684	9198	8138
SL1344_RS03430		complement(738091..738093))	tRNA	738051	738127	-	1781	813	2450	4804	6046	5217
ncRNA0311	STnc3290		sRNA	738320	738476	+	59	85	68	242	253	272
SL1344_RS03435	asnB	WP_000337041.1	CDS	738350	740014	-	7190	5339	5535	2887	2900	3238
ncRNA0468	StyR-287		sRNA	739998	740059	-	660	463	537	240	329	326
SL1344_RS03440	nagD	WP_000153143.1	CDS	740304	741056	-	1164	650	1184	1423	1490	1668
SL1344_RS03445	nagC	WP_000187577.1	CDS	741103	742323	-	1131	1069	1249	1559	1728	1882
SL1344_RS03450	nagA	WP_000271186.1	CDS	742328	743482	-	1902	1730	1892	2875	3062	3348
SL1344_RS03455	nagB	WP_001237059.1	CDS	743542	744342	-	1468	1393	1290	1544	1614	1972
SL1344_RS03460	nagE	WP_001023068.1	CDS	744669	746621	+	9856	11439	8807	1575	1434	1691
SL1344_RS03465	glnS	WP_001287180.1	CDS	746832	748499	+	5058	3733	5114	4140	4498	4718
ncRNA0312	STnc3300		sRNA	748526	748639	-	37	19	46	54	58	60
SL1344_RS03470	ybfM	WP_001258803.1	CDS	748945	750351	+	2187	1837	2129	522	504	447
SL1344_RS03475	ybfN	WP_000722261.1	CDS	750401	750733	+	777	588	598	167	161	196
SL1344_RS03480	SL1344_0671	WP_000057014.1	CDS	750782	752086	-	313	454	195	347	332	351
ncRNA0486	StyR-358		sRNA	751572	751684	+	8	9	13	37	46	36
SL1344_RS03485	SL1344_0672	WP_000811134.1	CDS	752137	753276	-	253	252	89	130	126	165
SL1344_RS03490	SL1344_0673	WP_000228709.1	CDS	753263	754666	-	381	378	121	388	465	446
SL1344_RS03495	SL1344_0674	WP_000423362.1	CDS	754764	755690	-	598	437	432	804	797	892
SL1344_RS03500	fur	WP_000131699.1	CDS	755805	756257	-	4311	2992	3425	7141	7518	7754
ncRNA0095	tp28		sRNA	756377	756432	-	333	190	295	695	729	746
SL1344_RS03505	fldA	WP_001018621.1	CDS	756539	757069	-	3729	2755	3591	6234	6718	6748
SL1344_RS03510	ybfE	WP_001040938.1	CDS	757232	757513	-	128	45	163	567	584	576
SL1344_RS03515	ybfF	WP_000773246.1	CDS	757647	758417	-	958	841	999	1296	1375	1382
SL1344_RS03520	seqA	WP_000848395.1	CDS	758602	759144	+	1969	1354	2077	2236	2411	2619
SL1344_RS03525	pgm	WP_000974387.1	CDS	759169	760809	+	13280	10056	11909	9717	9773	11288
SL1344_RS03530	SL1344_0681	WP_000070056.1	CDS	760924	761409	-	304	133	580	111	129	128
SL1344_RS03535	potE	WP_000042658.1	CDS	761474	762793	-	853	433	1540	191	227	185
SL1344_RS03540	speF	WP_001292402.1	CDS	762790	764988	-	1108	545	2364	133	150	153
ncRNA0506	RUF_178		sRNA	765332	765503	-	273	365	1484	64	64	58
SL1344_RS03545		WP_000862019.1	CDS	765386	765499	+	4	2	8	5	0	1
SL1344_RS03550	kdpE	WP_000186054.1	CDS	765750	766427	-	237	307	219	1039	1319	1352
SL1344_RS03555	kdpD	WP_000997487.1	CDS	766424	769108	-	733	897	721	1432	1896	1865
SL1344_RS03560	kdpC	WP_000579804.1	CDS	769105	769689	-	100	111	93	167	198	217
SL1344_RS03565	kdpB	WP_000088019.1	CDS	769698	771746	-	87	102	73	161	198	197
SL1344_RS03570	kdpA	WP_000730066.1	CDS	771767	773446	-	37	37	24	55	54	57
SL1344_RS03575	kdpF	WP_001670793.1	CDS	773446	773535	-	3	2	1	6	3	3
SL1344_RS03580	ybfA	WP_000401437.1	CDS	773872	774078	+	717	723	889	892	978	1082
SL1344_RS03585	phrB	WP_001142016.1	CDS	774189	775610	+	341	512	335	1903	1882	2294
SL1344_RS03590	ybgH	WP_001041129.1	CDS	775649	777130	-	132	159	187	431	557	534
SL1344_RS03595	ybgI	WP_000798844.1	CDS	777459	778202	+	1479	1994	1251	1635	1929	2125
SL1344_RS03600	ybgJ	WP_001188373.1	CDS	778218	778874	+	1151	1566	852	1238	1446	1669
SL1344_RS03605	ybgK	WP_000932050.1	CDS	778868	779800	+	1437	1883	1221	1709	1976	2101
SL1344_RS03610	ybgL	WP_001017909.1	CDS	779790	780524	+	827	1388	775	1589	1759	1832
SL1344_RS03615	SL1344_0696	WP_001521652.1	CDS	780848	780979	+	6	4	16	181	222	227
SL1344_RS03620	fimB	WP_000824704.1	CDS	781039	781605	+	160	121	173	582	702	617
SL1344_RS03625		WP_000898682.1	CDS	782179	782400	+	15	18	13	7	12	8
SL1344_RS03630	SL1344_0699	WP_001194239.1	CDS	782402	783142	+	46	58	54	48	61	63
SL1344_RS03635		gbkey=CDS	CDS	783428	784579	+	19	22	15	55	18	39
SL1344_RS03640	SL1344_0702	WP_001524627.1	CDS	784579	785472	+	23	25	18	37	19	28
SL1344_RS03645	SL1344_0703	WP_000824901.1	CDS	785485	786618	+	38	30	39	58	41	28
SL1344_RS03650	SL1344_0704	WP_000998823.1	CDS	786747	787517	+	23	22	12	45	45	37
SL1344_RS03655	SL1344_0705	WP_000702849.1	CDS	787521	788231	+	34	18	18	62	38	61
SL1344_RS03660	SL1344_0706	WP_000273739.1	CDS	788325	790103	+	52	52	55	73	59	72
SL1344_RS03665	SL1344_0707	WP_001667936.1	CDS	790296	791129	+	30	22	25	19	15	21
SL1344_RS03670	SL1344_0708	WP_000367426.1	CDS	791133	793082	+	73	73	75	69	79	85
SL1344_RS03675	SL1344_0709	WP_001519950.1	CDS	793150	793287	+	114	74	154	116	115	103
SL1344_RS03680	nei	WP_001113970.1	CDS	793336	794127	+	746	489	662	541	597	609
SL1344_RS03685	abrB	WP_001122057.1	CDS	794182	795228	-	868	845	481	763	672	887
SL1344_RS03690	gltA	WP_000785811.1	CDS	795365	796648	-	62172	53510	23146	9156	6694	8883
SL1344_RS03695	SL1344_0713	WP_010988982.1	CDS	796608	796994	+	125	88	50	30	26	25
SL1344_RS03700	sdhC	WP_000263340.1	CDS	797388	797792	+	16849	9103	7824	991	823	884
SL1344_RS03705	sdhD	WP_000254356.1	CDS	797786	798133	+	8519	8119	3945	468	344	353
SL1344_RS03710	sdhA	WP_000775561.1	CDS	798133	799899	+	16072	27516	8227	1125	940	1219
SL1344_RS03715	sdhB	WP_001537859.1	CDS	799916	800632	+	27112	33279	14157	1234	1049	1289
SL1344_RS03720	sucA	WP_001181501.1	CDS	801156	803957	+	41048	67873	31645	7324	6333	8060
SL1344_RS03725	sucB	WP_000099858.1	CDS	803972	805180	+	29333	54028	29355	6123	4744	6223
SL1344_RS03730	sucC	WP_001048589.1	CDS	805322	806488	+	15598	33996	15965	3995	3320	4660
SL1344_RS03735	sucD	WP_000114631.1	CDS	806488	807357	+	16588	24545	17907	4181	3622	4862
ncRNA0063	RybD		sRNA	807346	807433	+	3421	2516	3687	894	654	1025
SL1344_RS03740		WP_001526411.1	CDS	807386	807511	+	2119	1352	2210	540	357	607
ncRNA0387	SLnc1001		sRNA	808314	808360	-	8	18	26	8	9	5
SL1344_RS03745	cydA	WP_000884369.1	CDS	808940	810508	+	41729	36745	58294	2844	3682	3484
SL1344_RS03750	cydB	WP_000568258.1	CDS	810524	811663	+	19430	23952	24491	1593	2195	1959
SL1344_RS03755	ybgT	WP_000270278.1	CDS	811678	811791	+	11048	7164	11506	662	909	815
SL1344_RS03760		WP_000581368.1	CDS	811791	811931	+	13420	9355	12545	965	1261	1139
SL1344_RS03765	ybgE	WP_000875305.1	CDS	811928	812209	+	6977	5884	7003	1151	1365	1276
SL1344_RS03770	ybgC	WP_001046240.1	CDS	812438	812842	+	471	353	469	1661	1952	2015
SL1344_RS03775	tolQ	WP_001537860.1	CDS	812848	813531	+	1433	936	1549	2393	2458	2762
SL1344_RS03780	tolR	WP_000124676.1	CDS	813535	813963	+	1111	938	1223	1460	1477	1651
SL1344_RS03785	tolA	WP_000030590.1	CDS	814028	815251	+	1277	1242	1227	1645	2032	2350
SL1344_RS03790	tolB	WP_001562341.1	CDS	815375	816667	+	13137	10341	11932	13019	14008	15293
SL1344_RS03795	pal	WP_001176621.1	CDS	816702	817226	+	23282	14445	22509	14634	15357	18194
SL1344_RS03800	ybgF	WP_000097552.1	CDS	817236	818024	+	9214	6811	8394	9165	9530	11324
ncRNA0203	STnc835		sRNA	817257	817293	+	4169	2376	3649	2470	2211	2804
SL1344_RS03805		818222..818224)	tRNA	818189	818264	+	822	482	1278	3196	3931	3667
SL1344_RS24785		RF00391	ncRNA	818196	818361	+	1581	857	2341	6378	8296	7406
SL1344_RS03810		818429..818431)	tRNA	818396	818471	+	1204	606	1639	3974	5042	4571
SL1344_RS03815		818508..818510)	tRNA	818475	818550	+	512	239	861	2359	2829	2594
SL1344_RS03820		818633..818635)	tRNA	818600	818675	+	526	360	877	2469	2798	2635
SL1344_RS24790		RF00391	ncRNA	818607	818775	+	944	603	1517	4876	5724	5179
SL1344_RS03825		818843..818845)	tRNA	818810	818885	+	1655	928	1719	1197	1533	1341
SL1344_RS24795		RF00391	ncRNA	818915	819040	+	6	8	11	24	33	26
SL1344_RS24800		RF00391	ncRNA	819070	819194	+	0	0	5	5	6	8
SL1344_RS03830	nadA	WP_000115347.1	CDS	819489	820532	+	143	188	141	1732	1479	1912
SL1344_RS03835	pnuC	WP_000345368.1	CDS	820557	821276	+	374	451	353	2539	2241	2742
SL1344_RS03840	ybgR	WP_000951251.1	CDS	821273	822211	-	833	969	727	768	829	1057
SL1344_RS03845	ybgS	WP_000784380.1	CDS	822322	822708	-	945	1009	403	12237	11944	18655
SL1344_RS03850	aroG	WP_001109234.1	CDS	823028	824080	+	3344	2229	2809	4671	4359	5324
SL1344_RS03855	SL1344_0738	WP_001538328.1	CDS	824174	824716	-	428	382	319	198	197	207
SL1344_RS03860	SL1344_0739	WP_000086829.1	CDS	824734	825579	-	489	704	517	166	192	182
SL1344_RS03865	SL1344_0740	WP_000405925.1	CDS	825709	826599	+	491	438	525	183	137	186
SL1344_RS03870	SL1344_0741	WP_001538325.1	CDS	826600	827526	-	68	63	100	85	110	107
SL1344_RS03875	SL1344_0742	WP_000074128.1	CDS	827806	829074	+	40	28	37	60	53	67
SL1344_RS03880	dcoC	WP_001089088.1	CDS	829124	829369	+	6	17	12	22	18	27
SL1344_RS03885	dcoA	WP_000214940.1	CDS	829385	831160	+	134	105	83	83	106	114
SL1344_RS03890	dcoB	WP_000444828.1	CDS	831173	832474	+	91	100	73	70	81	92
SL1344_RS03895	SL1344_0746	WP_001005988.1	CDS	832593	833291	+	168	221	172	231	283	308
SL1344_RS03900	SL1344_0747	WP_000128327.1	CDS	833671	834750	+	44	55	75	158	186	209
SL1344_RS03905	SL1344_0748	WP_001214710.1	CDS	834750	835526	+	60	99	71	128	150	179
SL1344_RS03910	gpmA	WP_000301556.1	CDS	835617	836369	-	15323	16352	11206	28858	30775	35179
SL1344_RS03915	galM	WP_000931428.1	CDS	836593	837633	-	3191	2304	3161	2617	2832	3351
SL1344_RS03920	galK	WP_001049367.1	CDS	837627	838775	-	2230	2200	1952	1988	2039	2469
SL1344_RS03925	galT	WP_000187473.1	CDS	838778	839824	-	1210	1453	1161	1286	1332	1622
SL1344_RS03930	galE	WP_001265465.1	CDS	839835	840851	-	1235	1108	1130	1018	1226	1376
SL1344_RS03935	SL1344_0754	WP_000885513.1	CDS	841074	841982	-	66	41	53	77	94	76
SL1344_RS03940	modF	WP_000096928.1	CDS	842153	843628	-	1315	1428	1246	1410	1378	1509
SL1344_RS03945	modE	WP_001147410.1	CDS	843696	844484	-	918	727	861	950	927	1037
SL1344_RS03950	ybhT	WP_000891513.1	CDS	844613	844762	+	3327	3927	3961	5105	5988	6973
SL1344_RS03955	modA	WP_000951419.1	CDS	844929	845702	+	3724	4097	3604	649	715	748
SL1344_RS03960	modB	WP_000604026.1	CDS	845702	846391	+	3421	4682	3073	753	697	794
SL1344_RS03965	modC	WP_000891710.1	CDS	846394	847452	+	3513	4632	3639	852	842	1007
SL1344_RS03970	ybhA	WP_000127031.1	CDS	847453	848271	-	973	909	938	796	957	1003
ncRNA0475	StyR-305		sRNA	847583	847697	+	76	104	112	48	38	41
SL1344_RS03975	ybhE	WP_000815462.1	CDS	848435	849430	+	1952	2330	1393	3040	3314	3875
SL1344_RS03980	ybhC	WP_001094775.1	CDS	849574	850857	-	6246	3793	6481	2726	2754	2635
SL1344_RS03985	hutI	WP_001249472.1	CDS	851095	852318	+	3570	4382	2588	1409	1560	1594
SL1344_RS03990	hutG	WP_000195682.1	CDS	852315	853256	+	2717	3612	1741	902	943	989
SL1344_RS03995	hutC	WP_000287416.1	CDS	853301	854026	+	1509	1407	1012	606	596	659
SL1344_RS04000	hutU	WP_001115209.1	CDS	854223	855908	+	4315	6418	2031	407	389	392
SL1344_RS04005	hutH	WP_001095227.1	CDS	855910	857430	+	3237	9161	2113	287	336	346
SL1344_RS04010	ybhB	WP_000767419.1	CDS	857515	857991	-	792	974	620	4764	5463	5939
SL1344_RS04015	bioA	WP_000205518.1	CDS	858049	859338	-	74	78	60	5361	6421	6547
SL1344_RS04020	bioB	WP_000090729.1	CDS	859425	860465	+	85	83	74	6765	8227	8440
SL1344_RS04025	bioF	WP_000118956.1	CDS	860462	861619	+	69	76	48	4384	4936	5396
SL1344_RS04030	bioC	WP_000079909.1	CDS	861603	862358	+	30	43	39	1154	1293	1594
SL1344_RS04035	bioDa	WP_000167222.1	CDS	862351	863037	+	43	44	44	1686	1818	2311
ncRNA0315	STnc3340		sRNA	863329	863391	-	20	7	13	29	23	28
SL1344_RS04040	uvrB	WP_000042502.1	CDS	863688	865709	+	1546	1960	1544	2984	3585	3864
SL1344_RS04045		WP_001616936.1	CDS	866018	866191	+	391	474	279	301	388	360
SL1344_RS04050	slrP	WP_000482001.1	CDS	866199	868496	+	3664	6310	2894	3823	5033	5277
SL1344_RS04055	ybhK	WP_001246033.1	CDS	868588	869496	-	561	658	1072	591	656	675
SL1344_RS04060	moaA	WP_000168180.1	CDS	869893	870882	+	1143	1117	2466	1904	1904	2246
SL1344_RS04065	moaB	WP_000084604.1	CDS	870904	871416	+	2233	1641	3082	1778	1724	2172
SL1344_RS04070	moaC	WP_000080894.1	CDS	871419	871904	+	927	824	1582	1150	1195	1430
SL1344_RS04075	moaD	WP_000598596.1	CDS	871897	872142	+	487	554	776	621	600	720
SL1344_RS04080	moaE	WP_000545202.1	CDS	872144	872596	+	826	1076	1434	1113	1163	1431
SL1344_RS04085	ybhL	WP_000373611.1	CDS	872644	873348	+	8106	9121	7618	10724	10357	12337
SL1344_RS04090	ybhM	WP_000529073.1	CDS	873495	874202	+	26	25	32	196	310	238
SL1344_RS04095	SL1344_0785	WP_000512322.1	CDS	874235	874834	+	18	31	22	107	144	170
SL1344_RS04100	SL1344_0786	WP_001052198.1	CDS	874842	875402	+	35	24	32	97	98	135
SL1344_RS04105	ybhN	WP_001129814.1	CDS	875405	876367	-	189	428	162	1320	1465	1818
SL1344_RS04110	ybhO	WP_000649649.1	CDS	876367	877608	-	221	333	123	1129	1278	1564
SL1344_RS04115	ybhP	WP_000192039.1	CDS	877605	878363	-	103	162	66	1020	1234	1416
SL1344_RS04120	ybhQ	WP_000871970.1	CDS	878496	878906	+	4675	6184	3846	2415	2514	2680
SL1344_RS04125	ybhR	WP_000469050.1	CDS	878868	879974	-	647	578	474	1387	1709	1776
SL1344_RS04130	ybhS	WP_000045765.1	CDS	880090	881220	-	870	964	695	1708	2161	2312
SL1344_RS04135	ybhF	WP_001287616.1	CDS	881213	882949	-	1187	1573	930	2824	3310	3792
SL1344_RS04140	SL1344_0794	WP_000743436.1	CDS	882942	883937	-	1050	1039	751	1900	2317	2507
SL1344_RS04145	ybiH	WP_001025255.1	CDS	883937	884611	-	649	629	488	1368	1487	1625
SL1344_RS04150	rhlE	WP_000007060.1	CDS	884841	886205	+	154	125	140	395	514	524
SL1344_RS04155	dinG	WP_001218630.1	CDS	886413	888557	+	1085	1039	1165	1177	1229	1319
SL1344_RS04160	ybiB	WP_000386494.1	CDS	888587	889561	+	855	843	855	1128	1279	1348
ncRNA0214	STnc970		sRNA	889560	889716	-	222	162	225	764	809	756
SL1344_RS04165	ybiJ	WP_000849089.1	CDS	889717	889977	-	115	62	124	421	484	536
SL1344_RS04170		WP_001586196.1	CDS	889964	890104	-	28	18	25	104	114	136
SL1344_RS04175	ybiI	WP_000146330.1	CDS	890262	890528	-	289	369	190	760	892	1097
SL1344_RS04180	ybiN	WP_001275968.1	CDS	890733	891665	+	311	292	358	334	416	401
SL1344_RS04185	ybiO	WP_001267705.1	CDS	891662	893884	-	370	356	264	1628	1733	1999
SL1344_RS04190	glnQ	WP_000569093.1	CDS	894003	894725	-	4532	3478	1370	856	758	1006
SL1344_RS04195	glnP	WP_001159076.1	CDS	894722	895381	-	3014	2776	781	532	503	640
SL1344_RS04200	glnH	WP_000838671.1	CDS	895525	896271	-	15102	13499	4077	2355	2418	3008
SL1344_RS04205	dps	WP_000100805.1	CDS	896748	897251	-	19858	18680	11922	21626	21196	29668
SL1344_RS04210	ybiF	WP_001119554.1	CDS	897554	898441	-	449	298	391	293	276	327
ncRNA0187	STnc650		sRNA	898557	898793	+	4668	3418	4840	20359	23307	25114
SL1344_RS04215	ompX	WP_000716763.1	CDS	898795	899310	+	18250	15152	15151	90477	88908	103183
SL1344_RS04220	ybiP	WP_001089314.1	CDS	899373	900953	-	376	199	414	321	316	361
ncRNA0061	RybA		sRNA	901188	901397	-	7258	4821	2818	16517	20779	20665
SL1344_RS04225	SL1344_0810	WP_000533542.1	CDS	901532	902005	+	230	244	202	293	325	352
SL1344_RS04230	ybiR	WP_000050090.1	CDS	902002	903114	+	443	527	420	375	454	469
SL1344_RS04235	ybiS	WP_001056404.1	CDS	903158	904078	-	1017	572	839	1972	2223	2197
SL1344_RS04240	ybiT	WP_000961478.1	CDS	904297	905889	+	995	845	1016	1959	2081	2261
ncRNA0388	SLnc1002		sRNA	905985	906201	+	65	68	83	81	90	64
SL1344_RS04245	SL1344_0814	WP_000025354.1	CDS	906345	907241	+	35	42	45	86	82	99
SL1344_RS04250		WP_010988986.1	CDS	907270	907989	-	13	10	5	18	19	31
SL1344_RS04255	ybiU	WP_000210950.1	CDS	908194	909459	-	240	324	116	205	201	253
SL1344_RS04260	ybiV(1)	WP_000217910.1	CDS	909721	910530	+	971	641	659	1890	2031	2346
SL1344_RS04265	pflF	WP_000192673.1	CDS	910608	913040	-	189	169	305	126	155	106
SL1344_RS04270	pflE	WP_000576947.1	CDS	913046	913945	-	26	44	70	28	36	44
SL1344_RS04275	moeB	WP_000829280.1	CDS	914223	914972	-	680	562	718	749	829	919
SL1344_RS04280	moeA	WP_000395790.1	CDS	914972	916207	-	858	703	963	793	847	973
SL1344_RS04285	ybiK	WP_001030503.1	CDS	916410	917351	+	2167	3013	1591	4035	4663	4744
SL1344_RS04290	yliA	WP_001120598.1	CDS	917362	919233	+	2613	3147	1991	3699	3677	4198
SL1344_RS04295	yliB	WP_000191434.1	CDS	919266	920804	+	2680	3025	1792	2383	2303	2854
SL1344_RS04300	yliC	WP_000936064.1	CDS	920865	921785	+	1333	1616	947	1588	1546	1777
SL1344_RS04305	yliD	WP_001236024.1	CDS	921788	922699	+	830	1095	510	968	1043	1100
SL1344_RS04310	rimO	WP_000073317.1	CDS	922790	924115	-	657	419	876	1151	1454	1311
SL1344_RS04315	bssR	WP_000259651.1	CDS	924346	924729	+	661	755	1115	2651	3802	3900
ncRNA0229	STnc1200		sRNA	924756	924838	-	81	115	107	198	250	226
SL1344_RS04320	SL1344_0830	WP_001521476.1	CDS	925442	925957	+	34	23	19	55	66	84
SL1344_RS04325	SL1344_0831	WP_001521753.1	CDS	925980	926729	+	78	71	60	115	141	191
SL1344_RS04330	SL1344_0832	WP_000157776.1	CDS	926740	927687	+	69	88	56	140	141	167
SL1344_RS04335		WP_001200424.1	CDS	927720	927917	+	11	23	9	35	27	29
SL1344_RS04340	SL1344_0833	WP_000835387.1	CDS	927981	929144	+	171	234	171	412	468	549
SL1344_RS04345	SL1344_0834	WP_001000303.1	CDS	929593	931278	+	101	123	99	213	253	271
SL1344_RS04350	SL1344_0835	WP_000545327.1	CDS	931284	932174	-	130	133	141	2968	4427	3943
ncRNA0266	STnc1710		sRNA	932197	932336	+	251	308	277	255	215	270
SL1344_RS04355	SL1344_0836	WP_000287113.1	CDS	932439	932864	-	149	209	199	2478	3451	3023
SL1344_RS04360	yliI	WP_001526306.1	CDS	933211	933891	+	144	160	122	226	257	292
SL1344_RS04365	yliJ	WP_000631907.1	CDS	933888	934514	-	1771	1742	1430	2137	2052	2628
SL1344_RS04370	dacC	WP_000195709.1	CDS	934758	935960	+	2129	3068	1432	7842	9606	11122
ncRNA0427	StyR-90		sRNA	935790	935878	-	8	5	9	48	24	41
SL1344_RS04375	deoR	WP_000450103.1	CDS	936005	936763	-	929	628	1007	4176	4483	4835
SL1344_RS04380	ybjG	WP_001738110.1	CDS	936835	937443	-	656	590	507	5124	5231	5669
SL1344_RS04385	mdfA	WP_001181280.1	CDS	937756	938988	+	221	372	288	471	555	603
SL1344_RS04390	SL1344_0843	WP_000023547.1	CDS	939042	939857	-	581	425	541	863	842	980
SL1344_RS04395	SL1344_0844	WP_000217432.1	CDS	939854	941065	-	474	592	433	816	853	944
SL1344_RS04400	SL1344_0845	WP_000661875.1	CDS	941233	941853	+	120	103	124	162	176	189
ncRNA0062	RybB		sRNA	941813	941893	-	908	236	629	872	1187	1358
SL1344_RS04405	SL1344_0846	WP_001024853.1	CDS	941970	943655	-	777	628	764	1092	1117	1202
SL1344_RS04410	ybjM	WP_000680850.1	CDS	943926	944303	+	49	72	46	88	136	127
SL1344_RS04415	grxA	WP_000495513.1	CDS	944335	944598	-	2544	2994	2833	2653	2508	2987
SL1344_RS04420	ybjC	WP_001259137.1	CDS	944768	945058	+	226	209	219	475	592	572
SL1344_RS04425		gbkey=CDS	CDS	945042	945763	+	366	488	382	1117	1455	1486
SL1344_RS04430	rimK	WP_000684361.1	CDS	945821	946723	+	342	415	424	769	1022	1082
SL1344_RS04435	ybjN	WP_000624814.1	CDS	946820	947296	+	710	567	792	815	911	888
SL1344_RS04440	potF	WP_000125769.1	CDS	947645	948757	+	479	366	138	1568	1760	1809
SL1344_RS04445	potG	WP_001000698.1	CDS	948845	949978	+	254	297	132	1082	1196	1315
SL1344_RS04450	potH	WP_000105452.1	CDS	949988	950941	+	141	164	87	406	488	484
SL1344_RS04455	potI	WP_001061629.1	CDS	950938	951783	+	161	265	144	532	714	805
SL1344_RS04460	ybjO	WP_000505788.1	CDS	951857	952330	+	187	233	207	863	1016	1163
SL1344_RS04465	rumB	WP_001149782.1	CDS	952373	953503	+	296	264	338	576	670	645
SL1344_RS04470	SL1344_0860	WP_000399324.1	CDS	953786	955129	+	63	58	57	160	186	220
SL1344_RS04475	SL1344_0861	WP_000655399.1	CDS	955159	955479	+	24	26	38	44	38	59
SL1344_RS04480	SL1344_0862	WP_000644017.1	CDS	955489	956976	+	203	311	227	464	580	623
SL1344_RS04485	artJ	WP_000737538.1	CDS	957195	957926	-	243	182	169	258	306	397
SL1344_RS04490	artM	WP_000895397.1	CDS	958163	958831	-	1081	940	1009	2320	2662	3117
SL1344_RS04495	artQ	WP_001001677.1	CDS	958831	959547	-	1194	1328	1321	2492	2576	3169
SL1344_RS04500	artI	WP_000756589.1	CDS	959554	960285	-	3386	2900	2987	4011	4022	5139
SL1344_RS04505	artP	WP_000027186.1	CDS	960303	961031	-	1635	1356	1430	3608	3835	4447
SL1344_RS04510	ybjP	WP_001270724.1	CDS	961261	961776	-	2126	1516	1729	2076	1874	2646
SL1344_RS04515	SL1344_0869	WP_001160725.1	CDS	961904	962227	+	481	855	407	2664	3891	3744
SL1344_RS04520	ybjR	WP_000645852.1	CDS	962224	963054	+	1012	1285	801	5013	6682	6427
SL1344_RS04525	SL1344_0871	WP_000866904.1	CDS	963051	964064	-	703	506	616	743	815	856
SL1344_RS04530	ybjT	WP_000069000.1	CDS	964160	965593	-	1306	1178	1044	1238	1174	1415
SL1344_RS04535	ltaA	WP_000566344.1	CDS	965604	966605	-	1698	1833	1340	2227	2230	2600
SL1344_RS04540	poxB	WP_000815313.1	CDS	966644	968362	-	934	1365	519	4031	4358	5234
SL1344_RS04545	hcr	WP_001669316.1	CDS	968520	969488	-	363	325	420	834	1103	954
ncRNA0456	StyR-222		sRNA	969177	969251	+	6	2	5	7	13	11
SL1344_RS04550	hcp	WP_000458775.1	CDS	969500	971152	-	410	458	573	436	492	472
SL1344_RS04555	ybjE	WP_000491118.1	CDS	971296	972195	-	1305	895	1152	1309	1409	1560
SL1344_RS04560	ybjD	WP_000599761.1	CDS	972397	974055	+	2320	2683	1891	911	1062	1127
SL1344_RS04565	ybjX	WP_001519667.1	CDS	974052	975002	-	2509	1706	2612	6499	6759	7611
ncRNA0219	STnc1070		sRNA	974644	974892	+	500	596	523	1723	2253	2284
SL1344_RS04570	ybjY	WP_001201751.1	CDS	975148	976266	+	975	1288	812	5231	6796	7030
SL1344_RS04575	ybjZ	WP_000125877.1	CDS	976263	978209	+	1497	1997	1310	5366	7193	7745
SL1344_RS04580	cspD	WP_000447499.1	CDS	978339	978560	-	12676	8581	11730	2251	2357	2714
SL1344_RS04585	clpS	WP_000520789.1	CDS	978884	979204	+	2242	3070	2004	2878	3331	3726
SL1344_RS04590	clpA	WP_000934063.1	CDS	979235	981511	+	11822	15771	7881	15690	18801	21773
ncRNA0170	STnc490a		sRNA	981624	981711	-	1	1	5	6	6	9
SL1344_RS04595	tnp	WP_000502119.1	CDS	981703	982161	+	8	20	20	34	45	34
ncRNA0429	StyR-103a		sRNA	982000	982107	-	0	1	1	0	1	0
ncRNA0408	StyR-24a		sRNA	982113	982272	+	22	15	17	26	42	51
SL1344_RS04600	SL1344_0886	WP_001147384.1	CDS	982624	983307	-	183	157	106	578	591	759
SL1344_RS04605	SL1344_0887	WP_000988123.1	CDS	983478	983879	-	119	146	73	623	695	873
SL1344_RS04610		complement(984031..984033))	tRNA	983980	984067	-	168	186	122	359	333	381
SL1344_RS04615	SL1344_0888	WP_000097893.1	CDS	984216	984893	-	431	393	362	884	1029	1135
SL1344_RS04620	SL1344_0889	WP_000809973.1	CDS	984913	985773	-	174	140	140	274	339	414
SL1344_RS04625	SL1344_0890	WP_000597928.1	CDS	985882	986793	+	124	219	130	114	155	181
SL1344_RS04630	infA	WP_001040187.1	CDS	986884	987102	-	1428	667	1818	5682	7157	6917
SL1344_RS04635	SL1344_0892	WP_001539595.1	CDS	987030	987413	-	1331	950	1981	6375	8265	7592
SL1344_RS04640	aat	WP_001241650.1	CDS	987414	988118	-	685	698	867	1433	1558	1487
SL1344_RS04645	cydC	WP_001202267.1	CDS	988163	989884	-	1522	1775	2023	1589	1675	1709
SL1344_RS04650	cydD	WP_001044541.1	CDS	989885	991651	-	1674	1374	2166	1790	1854	1888
SL1344_RS04655	trxB	WP_000537407.1	CDS	991765	992733	-	8081	4961	7071	12567	13786	14441
SL1344_RS04660	lrp	WP_000228469.1	CDS	993279	993773	+	10724	10581	9188	7782	8599	9548
SL1344_RS04665	ftsK	WP_001526798.1	CDS	993908	997993	+	11325	10747	9689	11566	11930	12824
SL1344_RS04670	lolA	WP_001519746.1	CDS	998136	998747	+	2657	2612	2474	2888	3398	3762
SL1344_RS04675	ycaJ	WP_000067785.1	CDS	998757	1000100	+	2878	2778	2688	4276	4293	4760
SL1344_RS04680	serS	WP_000886697.1	CDS	1000359	1001651	+	9269	7656	10761	7487	7578	8333
ncRNA0138	STnc130		sRNA	1001645	1001760	-	19	34	37	21	19	14
SL1344_RS04685	dmsA	WP_000850250.1	CDS	1001888	1004332	+	3118	4156	6397	290	279	319
SL1344_RS04690	dmsB	WP_000213069.1	CDS	1004343	1004960	+	322	518	596	36	33	31
SL1344_RS04695	dmsC	WP_000534681.1	CDS	1004962	1005825	+	830	1722	1142	321	568	482
SL1344_RS04700		WP_001579039.1	CDS	1005855	1005962	+	136	270	219	82	110	95
SL1344_RS04705	ycaD	WP_000109271.1	CDS	1006175	1007323	+	185	187	248	1315	1774	1546
SL1344_RS04710	ycaM	WP_001134268.1	CDS	1007541	1008962	+	385	329	362	1266	1271	1332
ncRNA0313	STnc3310		sRNA	1009199	1009379	-	1373	1204	1398	1565	1960	2051
SL1344_RS04715	pflA	WP_000067973.1	CDS	1009255	1010052	-	2428	2380	2567	2495	3014	3250
SL1344_RS04720		gbkey=CDS	CDS	1010286	1010486	-	170	178	187	195	178	221
SL1344_RS04725	sopD2	WP_001145561.1	CDS	1010628	1011587	+	549	797	507	7381	9478	8886
SL1344_RS04730	pflB	WP_001292799.1	CDS	1011663	1013945	-	21427	12938	35466	19355	22658	25887
SL1344_RS04735	focA	WP_000642539.1	CDS	1014005	1014862	-	1749	2390	5375	4368	4872	5901
ncRNA0505	RUF_167		sRNA	1014991	1015135	-	99	68	204	121	131	140
SL1344_RS04740	ycaO	WP_000194823.1	CDS	1015267	1017027	-	618	341	690	822	952	958
SL1344_RS04745	ycaP	WP_000642866.1	CDS	1017164	1017856	+	173	337	134	684	887	1098
SL1344_RS04750	serC	WP_000079584.1	CDS	1018042	1019130	+	4259	3233	4124	8805	8868	9883
SL1344_RS04755	aroA	WP_000445178.1	CDS	1019201	1020484	+	1397	1318	1409	3836	3840	4432
SL1344_RS04760	ycaL	WP_000792312.1	CDS	1020627	1021388	+	291	232	285	728	804	908
SL1344_RS04765	cmk	WP_000125006.1	CDS	1021561	1022244	+	1184	762	1566	3273	3723	3621
SL1344_RS04770	rpsA	WP_000140324.1	CDS	1022358	1024031	+	31963	21269	38758	33597	41019	44223
SL1344_RS04775	himD	WP_000167332.1	CDS	1024187	1024471	+	4626	3447	3695	6069	6252	7460
ncRNA0314	STnc3330		sRNA	1024493	1024591	-	14	14	22	13	10	11
SL1344_RS04780	rec2	WP_000705784.1	CDS	1024701	1026965	+	156	177	167	318	402	435
SL1344_RS04785	msbA	WP_000551246.1	CDS	1027002	1028750	+	2036	1308	2296	2513	2879	2824
SL1344_RS04790	lpxK	WP_000561681.1	CDS	1028747	1029724	+	806	934	938	1389	1557	1581
SL1344_RS04795	ycaQ	WP_000056911.1	CDS	1029768	1031000	+	247	257	256	490	562	554
SL1344_RS04800	ycaR	WP_000350061.1	CDS	1031052	1031234	+	86	107	119	205	224	281
SL1344_RS04805	kdsB	WP_000011576.1	CDS	1031231	1031977	+	649	1034	787	1158	1324	1482
SL1344_RS04810	SL1344_0926	WP_000436889.1	CDS	1032188	1033081	+	607	1221	1371	446	533	512
SL1344_RS04815	ycbC	WP_000899563.1	CDS	1033061	1033837	-	364	280	349	655	702	769
SL1344_RS04820	smtA	WP_001154025.1	CDS	1033973	1034776	+	784	1017	830	812	1018	1010
SL1344_RS04825	mukF	WP_001288828.1	CDS	1034769	1036091	+	1881	2131	1829	1421	1678	1745
SL1344_RS04830	mukE	WP_000060025.1	CDS	1036072	1036776	+	2981	2933	2504	1583	1703	1674
SL1344_RS04835	mukB	WP_000572724.1	CDS	1036776	1041242	+	19712	18895	15578	13997	16872	16175
ncRNA0504	RUF_107c.10		sRNA	1041280	1041377	+	583	412	403	324	341	365
SL1344_RS04840	ycbB	WP_000925872.1	CDS	1041587	1043428	+	5276	5319	4278	9008	9324	10819
SL1344_RS04845	ycbK	WP_000357052.1	CDS	1043688	1044236	+	3064	2106	2795	3561	3910	4094
SL1344_RS04850	ycbL	WP_001109471.1	CDS	1044264	1044911	+	3399	3042	3032	3600	4062	4405
SL1344_RS04855	aspC	WP_000462653.1	CDS	1044973	1046163	-	8342	6085	7825	9189	8712	10043
SL1344_RS04860	ompF	WP_000977713.1	CDS	1046348	1047439	-	10430	9838	10951	4529	5349	5181
ncRNA0316	STnc3350		sRNA	1047890	1048059	+	70	48	68	70	75	55
SL1344_RS04865	asnCa	WP_000117870.1	CDS	1048046	1049446	-	9818	7673	9586	10241	11298	11975
SL1344_RS04870	SL1344_0938	WP_000762342.1	CDS	1049647	1050108	-	374	417	373	386	446	440
SL1344_RS04875		WP_000301921.1	CDS	1050105	1050338	-	56	44	48	91	105	82
SL1344_RS04880	dpaL	WP_000544849.1	CDS	1050425	1051639	+	183	146	134	85	107	123
SL1344_RS04885	SL1344_0940	WP_000893207.1	CDS	1051884	1053320	+	42	47	51	69	78	71
SL1344_RS04890	pncB	WP_000191399.1	CDS	1053398	1054600	-	1125	803	1201	4506	4523	4567
SL1344_RS04895	SL1344_0942	WP_001262306.1	CDS	1054795	1056087	-	1642	1732	1768	2120	2339	2385
ncRNA0369	STnc4200		sRNA	1055773	1055892	+	21	22	39	109	81	98
SL1344_RS04900	SL1344_0943	WP_000065276.1	CDS	1056132	1056380	-	54	43	32	30	28	43
SL1344_RS04905	SL1344_0944	WP_001237031.1	CDS	1056421	1056660	-	15	21	11	15	16	19
SL1344_RS04910	SL1344_0945	WP_000432238.1	CDS	1056703	1057812	-	59	49	60	35	57	60
SL1344_RS04915	recEa	WP_000017133.1	CDS	1057823	1060708	-	124	119	115	105	113	151
ncRNA0027	IsrB		sRNA	1060741	1060834	+	178	109	141	54	55	80
SL1344_RS04920		WP_000407058.1	CDS	1060835	1061071	-	91	119	92	21	22	37
SL1344_RS04925	SL1344_0948	WP_000917564.1	CDS	1061156	1061314	-	85	82	58	22	17	12
SL1344_RS04930	SL1344_0950	WP_001038966.1	CDS	1061617	1062027	-	869	755	922	1706	1834	1959
SL1344_RS04935		WP_000370145.1	CDS	1062147	1062386	+	63	46	47	20	33	32
SL1344_RS04940	C1	WP_000426364.1	CDS	1062406	1062726	+	93	70	51	30	33	26
ncRNA0220	STnc1080		sRNA	1062745	1062806	-	44	30	40	34	33	39
SL1344_RS04945	SL1344_0952	WP_000062941.1	CDS	1062811	1063794	+	112	100	109	101	100	111
SL1344_RS04950	SL1344_0953	WP_000800010.1	CDS	1063797	1064546	+	34	41	29	22	28	25
SL1344_RS04955	SL1344_0954	WP_000113629.1	CDS	1064557	1064904	+	7	15	13	18	12	15
SL1344_RS04960	SL1344_0955	WP_000065108.1	CDS	1064901	1065212	+	168	237	180	263	325	325
SL1344_RS04965	SL1344_0956	WP_000284861.1	CDS	1065311	1065580	+	1836	2576	1855	1849	1884	2192
ncRNA0188	STnc660		sRNA	1065576	1065670	+	941	1200	1008	1316	1419	1688
SL1344_RS04970	SL1344_0957	WP_001217665.1	CDS	1065872	1066105	+	237	167	246	112	105	114
SL1344_RS04975		WP_000807548.1	CDS	1066217	1066438	+	272	275	274	334	399	434
SL1344_RS04980	SL1344_0958	WP_000929805.1	CDS	1066521	1067123	+	74	85	117	264	318	290
SL1344_RS04985		WP_001241019.1	CDS	1067123	1067329	+	6	7	5	11	10	12
SL1344_RS04990	ninG	WP_001096552.1	CDS	1067332	1067943	+	21	12	8	20	15	30
SL1344_RS04995	SL1344_0960	WP_001617856.1	CDS	1067940	1068086	+	6	4	4	9	6	10
SL1344_RS05000	SL1344_0961	WP_001047631.1	CDS	1068076	1068873	+	27	71	28	85	111	118
SL1344_RS05005	SL1344_0962	WP_010989004.1	CDS	1068940	1069257	+	104	100	132	188	214	251
SL1344_RS05010	SL1344_0963	WP_001534733.1	CDS	1069431	1069556	+	12	17	5	10	1	8
SL1344_RS05015	SL1344_0964	WP_000798705.1	CDS	1069692	1070141	-	306	281	421	128	165	119
ncRNA0139	STnc140		sRNA	1070213	1070327	+	16	23	12	7	8	13
SL1344_RS05020	gtgA	WP_001141973.1	CDS	1070502	1071188	-	389	321	291	306	330	352
SL1344_RS05025	SL1344_0965A	WP_000783335.1	CDS	1071458	1071793	+	5	3	2	12	13	15
SL1344_RS05030	nucD	WP_001222795.1	CDS	1071780	1072229	+	48	60	61	113	150	171
SL1344_RS05035	SL1344_0967	WP_001541990.1	CDS	1072247	1072726	+	34	17	28	71	82	67
SL1344_RS05040	SL1344_0968	WP_000371784.1	CDS	1072934	1073467	+	114	96	79	123	191	158
SL1344_RS05045	SL1344_0969	WP_015701323.1	CDS	1073508	1075562	+	138	207	150	338	473	497
SL1344_RS05050		WP_000196190.1	CDS	1075559	1075765	+	4	18	14	14	23	20
SL1344_RS05055	SL1344_0971	WP_001009208.1	CDS	1075762	1077309	+	128	213	124	270	328	327
SL1344_RS05060	SL1344_0972	WP_001751953.1	CDS	1077272	1079314	+	241	334	206	368	539	550
SL1344_RS05065	SL1344_0973	WP_001107908.1	CDS	1079405	1079728	+	30	47	28	57	58	57
SL1344_RS05070	SL1344_0974	WP_000774239.1	CDS	1079721	1080020	+	11	35	13	28	47	52
SL1344_RS05075	SL1344_0975	WP_000453194.1	CDS	1080001	1080567	+	49	63	30	59	119	101
SL1344_RS05080	SL1344_0976	WP_000196702.1	CDS	1080564	1080965	+	53	74	29	42	80	86
SL1344_RS05085	SL1344_0977	WP_000132758.1	CDS	1080977	1081726	+	118	126	75	140	208	225
SL1344_RS05090	SL1344_0978	WP_000478859.1	CDS	1081772	1082170	+	86	99	62	88	122	131
SL1344_RS05095	SL1344_0979	WP_000883476.1	CDS	1082233	1082496	+	37	56	41	45	74	67
SL1344_RS05100	SL1344_0980	WP_015701325.1	CDS	1082510	1085563	+	351	430	331	462	579	576
SL1344_RS05105	SL1344_0981	WP_001670730.1	CDS	1085563	1085892	+	40	51	38	27	43	49
SL1344_RS05110	SL1344_0982	WP_000725267.1	CDS	1085991	1086488	+	603	766	564	342	419	491
SL1344_RS05115	sodCa	WP_000877926.1	CDS	1086605	1087138	-	3911	2700	3167	29083	43361	38379
SL1344_RS05120	SL1344_0984	WP_001152415.1	CDS	1087228	1087923	+	182	194	167	177	237	194
SL1344_RS05125	SL1344_0985	WP_000606351.1	CDS	1087933	1088670	+	115	153	112	132	133	139
SL1344_RS05130	SL1344_0986	WP_000246065.1	CDS	1088568	1089272	+	163	149	152	151	153	174
SL1344_RS05135	SL1344_0987	WP_000033415.1	CDS	1089344	1092694	+	352	352	373	712	789	796
SL1344_RS05140		WP_000178849.1	CDS	1092733	1092975	+	58	45	64	29	18	30
SL1344_RS05145	SL1344_0988	WP_001144682.1	CDS	1093029	1095236	+	168	164	157	325	402	373
SL1344_RS05150	SL1344_0989	WP_000143167.1	CDS	1095236	1095817	+	109	141	97	160	199	169
SL1344_RS05160	sseI	WP_001533476.1	CDS	1096293	1097261	+	128	136	110	3724	5431	4136
SL1344_RS05165		WP_001541994.1	CDS	1097529	1097777	+	10	38	21	196	419	363
SL1344_RS05170	SL1344_0993	WP_000334547.1	CDS	1097909	1098535	-	14	19	20	84	108	94
SL1344_RS05175	SL1344_0994	WP_010989011.1	CDS	1098604	1098903	-	208	267	165	478	536	482
SL1344_RS05180	gtgE	WP_001525490.1	CDS	1098888	1099574	-	2553	2097	2061	2207	2693	2379
SL1344_RS05185	gtgF	WP_000497441.1	CDS	1099845	1100036	-	17	15	17	35	31	43
SL1344_RS05190	pepN	WP_000193784.1	CDS	1100463	1103075	+	7653	10104	6504	8166	8984	10322
SL1344_RS05195	pyrD	WP_000291723.1	CDS	1103283	1104293	+	356	324	666	768	970	1066
SL1344_RS05200	ycbW	WP_001220671.1	CDS	1104459	1105001	+	1956	1632	1642	3293	4069	4154
SL1344_RS05205	SL1344_1000	WP_000224069.1	CDS	1104998	1106107	-	353	254	388	438	475	529
SL1344_RS05210	rlmL	WP_001086485.1	CDS	1106206	1108314	+	1145	1259	1369	1669	2244	2060
SL1344_RS05215	uup	WP_000053044.1	CDS	1108327	1110234	+	1994	1511	2116	2529	2922	2895
SL1344_RS05220	pqiA	WP_000333148.1	CDS	1110249	1111502	+	881	785	911	1205	1431	1455
SL1344_RS05225	pqiB	WP_000433414.1	CDS	1111507	1113147	+	1386	1172	1328	2453	3110	3018
SL1344_RS05230	ymbA	WP_000759136.1	CDS	1113144	1113707	+	1040	763	999	2028	2384	2253
ncRNA0024	IS042		sRNA	1113719	1113828	-	20	15	25	15	21	15
SL1344_RS05235	rmf	WP_001537784.1	CDS	1113963	1114130	+	6254	6463	3488	7925	9379	13523
SL1344_RS05240	fabA	WP_000227928.1	CDS	1114230	1114748	-	1704	1239	1991	2158	2388	2618
SL1344_RS05245	lonH	WP_000156453.1	CDS	1114817	1116577	-	1489	1098	1591	1847	1891	2026
SL1344_RS05250	ycbG	WP_000877172.1	CDS	1116763	1117215	+	711	524	646	506	574	659
SL1344_RS05255	ompA	WP_001674965.1	CDS	1117287	1118339	-	118112	83966	92994	229376	222783	275425
SL1344_RS05260	sulA	WP_000288732.1	CDS	1118696	1119205	-	963	766	933	991	1028	1139
SL1344_RS05265	sxy	WP_001202375.1	CDS	1119422	1120027	+	582	571	504	284	329	370
SL1344_RS05270	yccS	WP_000950880.1	CDS	1120014	1122167	-	818	631	906	1065	1048	903
SL1344_RS05275	yccF	WP_001261222.1	CDS	1122186	1122632	-	226	144	265	154	207	202
SL1344_RS05280	helD	WP_000420505.1	CDS	1122756	1124810	+	1485	2196	1326	2311	2661	3146
SL1344_RS05285	mgsA	WP_000424187.1	CDS	1124846	1125304	-	3801	2543	3930	921	910	979
SL1344_RS05290	yccT	WP_000847719.1	CDS	1125399	1126061	-	97	128	71	283	309	302
SL1344_RS05295	SL1344_1018	WP_001537782.1	CDS	1126235	1126648	+	1035	2876	956	2725	3297	3901
SL1344_RS05300	yccV	WP_000561983.1	CDS	1126693	1127010	-	3709	2492	4239	3267	3709	3620
SL1344_RS05305	yccW	WP_000140480.1	CDS	1127068	1128279	-	740	530	844	1162	1223	1225
SL1344_RS05310	SL1344_1021	WP_000859419.1	CDS	1128494	1129042	+	151	201	214	286	305	304
SL1344_RS05315	SL1344_1022	WP_000548082.1	CDS	1129068	1129847	+	424	371	385	745	833	761
SL1344_RS05320	yccX	WP_000072884.1	CDS	1129896	1130177	+	116	176	115	273	309	367
SL1344_RS05325	yccK	WP_000904446.1	CDS	1130174	1130503	-	621	400	647	1425	1616	1576
SL1344_RS05330	yccA	WP_000374050.1	CDS	1130590	1131249	-	9052	5517	7852	9334	12563	11788
SL1344_RS05335		1131678..1131680)	tRNA	1131644	1131731	+	449	546	449	501	537	672
SL1344_RS05340	pipA	WP_000938191.1	CDS	1131870	1132550	-	54	76	58	759	993	828
SL1344_RS05345	pipB	WP_001123045.1	CDS	1132772	1133647	-	204	312	145	10434	16756	10938
SL1344_RS05350	SL1344_1028	WP_001532024.1	CDS	1133907	1134185	+	49	33	43	23	32	22
SL1344_RS05355	pipC	WP_000444724.1	CDS	1134195	1134536	-	14359	15020	11500	1026	950	591
SL1344_RS05360	sopB	WP_001166946.1	CDS	1134553	1136238	-	27518	31524	20047	1830	1433	1026
SL1344_RS05365	orfX	WP_001111006.1	CDS	1136570	1136740	+	664	1143	2340	11	20	14
SL1344_RS05370	SL1344_1032	WP_000174813.1	CDS	1136741	1136851	-	37	47	51	144	138	150
SL1344_RS05375	pipD	WP_000760228.1	CDS	1136960	1138429	-	1127	1167	1096	2168	2494	2338
SL1344_RS05380	copS	WP_000240046.1	CDS	1138602	1139966	-	278	217	267	626	729	746
SL1344_RS05385	copR	WP_000698205.1	CDS	1139959	1140639	-	292	212	280	689	884	856
SL1344_RS05390	SL1344_1036	WP_000833188.1	CDS	1140775	1141185	+	272	259	272	679	826	837
ncRNA0377	SLnc0010		sRNA	1141185	1141393	-	60	28	58	127	150	160
ncRNA0378	SLnc0010a		sRNA	1141185	1141397	+	297	281	232	142	150	190
SL1344_RS05395	hpaC	WP_001195556.1	CDS	1141518	1142030	-	173	165	89	193	251	237
SL1344_RS05400	hpaB	WP_000801497.1	CDS	1142048	1143610	-	209	155	71	149	172	157
SL1344_RS05405	hpaR	WP_000543922.1	CDS	1143828	1144268	-	117	96	129	97	132	143
SL1344_RS05410	hpaG	WP_000679216.1	CDS	1144543	1145832	+	838	669	357	170	161	141
SL1344_RS05415	hpaE	WP_000723524.1	CDS	1145829	1147295	+	785	902	318	253	286	227
SL1344_RS05420	hpaD	WP_000516978.1	CDS	1147297	1148148	+	330	502	160	196	183	188
SL1344_RS05425	hpaF	WP_001119849.1	CDS	1148158	1148538	+	242	421	146	109	91	124
SL1344_RS05430	hpaH	WP_000884795.1	CDS	1148681	1149484	+	170	299	136	115	118	120
SL1344_RS05435	hpaI	WP_000785072.1	CDS	1149495	1150286	+	155	272	105	103	143	111
SL1344_RS05440	hpaX	WP_001285801.1	CDS	1150358	1151734	+	185	264	191	260	339	354
SL1344_RS05445	hpaA	WP_000336602.1	CDS	1151744	1152640	+	119	158	88	139	156	178
SL1344_RS05450	SL1344_1048	WP_000976562.1	CDS	1152654	1153592	+	213	204	231	476	523	550
ncRNA0271	STnc1880		sRNA	1153745	1153841	+	21	15	34	70	72	101
SL1344_RS05455	SL1344_1049	WP_001537781.1	CDS	1154000	1154362	-	34	28	23	218	217	250
ncRNA0317	STnc3400		sRNA	1154915	1155001	+	28	26	19	191	259	204
SL1344_RS05460	yccD	WP_001284251.1	CDS	1155016	1155321	-	1322	1519	1054	716	731	962
SL1344_RS05465	cbpA	WP_000420603.1	CDS	1155321	1156241	-	2641	2067	2163	1337	1446	1590
SL1344_RS05470	scsA	WP_001118902.1	CDS	1156476	1156838	+	429	350	417	542	681	666
SL1344_RS05475	scsB	WP_000972957.1	CDS	1156887	1158773	+	121	144	158	166	197	214
SL1344_RS05480	scsC	WP_000876693.1	CDS	1158770	1159393	+	59	45	62	78	103	94
SL1344_RS05485	scsD	WP_000907530.1	CDS	1159383	1159889	+	109	129	73	179	213	197
SL1344_RS05490	agp	WP_000749201.1	CDS	1160022	1161263	+	2929	3094	3082	1206	1223	1371
SL1344_RS05495	yccJ	WP_001143125.1	CDS	1161297	1161524	-	4643	8494	3584	12983	12836	18158
SL1344_RS05500	wrbA	WP_001062899.1	CDS	1161545	1162141	-	2142	3560	1943	6298	6441	9270
SL1344_RS05505	ymdF	WP_001273663.1	CDS	1162526	1162693	+	417	719	303	3045	4529	5998
SL1344_RS05510	ycdC	WP_000083126.1	CDS	1162830	1163468	+	216	196	218	563	650	751
SL1344_RS05515	SL1344_1061	WP_000821066.1	CDS	1163465	1163860	-	4451	5122	3389	2667	3057	3016
SL1344_RS05520	putA	WP_000537528.1	CDS	1163919	1167881	-	43701	48776	26320	12110	10461	11596
SL1344_RS05525	putP	WP_001018467.1	CDS	1168303	1169811	+	19675	21448	7274	1223	1353	1366
ncRNA0189	STnc670		sRNA	1170291	1170591	+	8549	9031	4790	2626	2940	3305
SL1344_RS05530		WP_000245336.1	CDS	1170429	1170725	+	6860	6877	3049	3593	3950	4584
SL1344_RS05535	phoH	WP_000533527.1	CDS	1170704	1171492	+	13068	17209	5599	6755	6710	8939
SL1344_RS05540	SL1344_1065	WP_000433674.1	CDS	1171598	1172479	-	942	666	1133	2681	3096	3187
ncRNA0177	STnc500		sRNA	1172561	1172641	-	101	74	74	38	39	47
SL1344_RS05545	SL1344_1066	WP_000628082.1	CDS	1172764	1174260	-	297	254	258	132	128	141
SL1344_RS05550	SL1344_1067	WP_000054243.1	CDS	1174597	1175277	-	338	264	320	67	51	62
SL1344_RS05555	SL1344_1068	WP_000525751.1	CDS	1175783	1176943	+	256	240	193	68	59	75
SL1344_RS05560	SL1344_1069	WP_000700610.1	CDS	1176989	1177681	+	170	229	121	29	21	42
SL1344_RS05565	SL1344_1070	WP_000560761.1	CDS	1177964	1179244	+	95	152	95	140	173	275
SL1344_RS05570	SL1344_1071	WP_001520504.1	CDS	1179258	1180361	+	434	734	464	652	857	959
SL1344_RS24805		RF00391	ncRNA	1180513	1180648	-	12	5	4	31	36	22
SL1344_RS24810		RF00391	ncRNA	1180697	1180832	-	17	12	24	46	51	60
SL1344_RS05580		complement(1180932..1180934))	tRNA	1180881	1180968	-	283	309	279	396	528	469
SL1344_RS05585		WP_000950664.1	CDS	1181042	1181206	-	7	4	9	17	237	17
SL1344_RS05590	ycdW	WP_000402556.1	CDS	1181205	1182143	+	1770	1632	1827	1333	1408	1618
SL1344_RS05595	ycdX	WP_000283643.1	CDS	1182228	1182965	+	1346	1070	1341	1737	1928	2046
SL1344_RS05600	ycdY	WP_001001883.1	CDS	1182989	1183543	+	646	792	666	1082	1292	1399
SL1344_RS05605	ycdZ	WP_001546652.1	CDS	1183644	1184126	+	335	408	393	777	884	953
SL1344_RS05610	csgG	WP_001137620.1	CDS	1184165	1184998	-	92	86	52	218	257	272
SL1344_RS05615	csgF	WP_001264073.1	CDS	1185025	1185441	-	22	18	8	39	44	43
SL1344_RS05620	csgE	WP_000833307.1	CDS	1185468	1185863	-	28	27	17	78	78	79
SL1344_RS05625	csgD	WP_000481517.1	CDS	1185868	1186518	-	80	58	46	168	180	184
SL1344_RS05630	csgB	WP_000791655.1	CDS	1187273	1187728	+	26	17	13	21	25	30
SL1344_RS05635	csgA	WP_000771416.1	CDS	1187770	1188225	+	52	70	46	38	75	61
SL1344_RS05640	csgC	WP_000557256.1	CDS	1188287	1188613	+	1096	1696	1206	95	108	119
SL1344_RS05645	ymdA	WP_000111254.1	CDS	1188744	1189064	+	965	1181	950	157	156	181
SL1344_RS05650	SL1344_1084	WP_000203944.1	CDS	1189154	1189693	+	823	1338	895	868	1038	1253
SL1344_RS05655	ymdC	WP_031601915.1	CDS	1189686	1191116	+	2006	2996	1770	2614	2859	3230
SL1344_RS05660	mdoC	WP_000100055.1	CDS	1191133	1192287	-	222	145	238	549	489	605
SL1344_RS05665	mdoG	WP_000681121.1	CDS	1192541	1194094	+	6305	4375	6389	7317	7899	8335
SL1344_RS05670	mdoH	WP_001044610.1	CDS	1194087	1196630	+	6431	6539	6204	8082	8676	9635
SL1344_RS05675	yceK	WP_001217832.1	CDS	1196704	1196931	+	61	46	83	83	79	80
SL1344_RS05680	msyB	WP_000180050.1	CDS	1196932	1197306	-	1097	2100	652	6467	7410	8785
SL1344_RS05685	yceE	WP_000075048.1	CDS	1197388	1198602	-	147	171	202	287	291	353
ncRNA0292	STnc3040		sRNA	1198646	1198752	+	2	6	5	17	27	34
SL1344_RS05690	htrB	WP_000163973.1	CDS	1198757	1199677	-	1143	830	1050	1654	1789	1790
SL1344_RS05695	yceA	WP_001144632.1	CDS	1199897	1200949	+	392	302	437	3068	4254	3993
SL1344_RS05700	yceI	WP_000739886.1	CDS	1201001	1201576	-	131	158	103	407	464	555
SL1344_RS05705	yceJ	WP_001159786.1	CDS	1201573	1202145	-	49	48	49	189	165	230
SL1344_RS05710	yceO	WP_001253282.1	CDS	1202408	1202521	-	19	22	19	48	38	44
SL1344_RS05715	solA	WP_000872773.1	CDS	1202562	1203680	-	2263	1327	1961	1793	1686	1903
SL1344_RS05720	bssS	WP_000414441.1	CDS	1203793	1204047	-	2428	1522	2326	1248	1381	1648
ncRNA0476	StyR-306		sRNA	1204044	1204124	-	987	626	974	555	591	690
ncRNA0275	STnc2000		sRNA	1204289	1204375	-	287	194	239	387	310	481
SL1344_RS05725	dinI	WP_001217763.1	CDS	1204337	1204582	-	654	430	682	1077	1013	1275
SL1344_RS05730	pyrC	WP_000126580.1	CDS	1204656	1205702	-	2960	1412	2897	5776	6008	6187
SL1344_RS05735	yceB	WP_000713057.1	CDS	1205807	1206367	-	1830	1481	1746	2762	2671	3663
SL1344_RS05740	grxB	WP_000780893.1	CDS	1206492	1207139	-	3706	3611	3104	9137	9720	13130
SL1344_RS05745	yceL	WP_000092178.1	CDS	1207203	1208411	-	300	346	330	640	590	710
SL1344_RS05750	rimJ	WP_000468204.1	CDS	1208648	1209232	+	1368	1841	1421	654	717	854
SL1344_RS05755	yceH	WP_000873047.1	CDS	1209268	1209915	+	2763	2533	2298	797	821	1011
SL1344_RS05760	mviM	WP_001259729.1	CDS	1209917	1210840	+	2543	2345	2272	1085	1145	1352
SL1344_RS05765	mviN	WP_001537775.1	CDS	1211144	1212679	+	758	948	756	1179	1423	1472
ncRNA0503	RUF_107c.8		sRNA	1212658	1212715	+	75	51	65	121	148	129
SL1344_RS05770	flgN	WP_000197547.1	CDS	1212761	1213183	-	7894	8604	7817	1272	1143	1471
SL1344_RS05775	flgM	WP_000020893.1	CDS	1213188	1213481	-	10242	8841	10657	1075	937	1318
SL1344_RS05780	flgA	WP_001194082.1	CDS	1213573	1214232	-	6485	8164	6278	795	525	762
SL1344_RS05785	flgB	WP_000887043.1	CDS	1214389	1214805	+	6810	6305	5856	684	385	583
SL1344_RS05790	flgC	WP_001196448.1	CDS	1214809	1215213	+	5358	5098	4852	471	251	441
SL1344_RS05795	flgD	WP_000020450.1	CDS	1215225	1215923	+	6556	9276	6581	710	362	612
SL1344_RS05800	flgE	WP_000010567.1	CDS	1215950	1217161	+	19114	19752	18025	1522	816	1463
SL1344_RS05805	flgF	WP_000349278.1	CDS	1217182	1217937	+	11802	15397	11612	970	524	925
SL1344_RS05810	flgG	WP_000625851.1	CDS	1217951	1218733	+	16587	16800	15596	1329	790	1255
SL1344_RS05815	flgH	WP_001174897.1	CDS	1218788	1219486	+	3510	4572	3401	499	338	464
SL1344_RS05820	flgI	WP_001518955.1	CDS	1219498	1220595	+	3292	4541	3167	547	399	552
SL1344_RS05825	flgJ	WP_000578692.1	CDS	1220595	1221545	+	2749	3597	2748	555	408	582
SL1344_RS05830	flgK	WP_000096425.1	CDS	1221610	1223271	+	18693	21097	18389	1769	1290	2025
SL1344_RS05835	flgL	WP_001223033.1	CDS	1223286	1224239	+	17031	14673	15986	1387	988	1573
ncRNA0204	STnc840		sRNA	1224246	1224318	+	1466	896	1126	90	68	135
SL1344_RS05840	rne	WP_000827470.1	CDS	1224496	1227699	-	13224	8952	13360	9494	9469	10544
SL1344_RS05845		WP_001539709.1	CDS	1227835	1228083	+	12	3	7	22	20	18
SL1344_RS05850	rluC	WP_000846319.1	CDS	1228273	1229232	+	565	335	646	1054	1363	1217
SL1344_RS05855	SL1344_1124	WP_000024286.1	CDS	1229370	1230131	+	290	349	376	284	303	318
SL1344_RS05860	SL1344_1125	WP_000528430.1	CDS	1230337	1230561	+	86	100	76	91	85	102
SL1344_RS05865	maf-a	WP_001137605.1	CDS	1230633	1231217	-	999	926	900	1154	1289	1347
ncRNA0079	SraB		sRNA	1231270	1231378	+	275	194	371	848	769	918
SL1344_RS05870	yceD	WP_001174492.1	CDS	1231415	1231936	+	10208	5483	12024	10600	11979	11963
SL1344_RS05875	rpl32	WP_000290727.1	CDS	1231988	1232161	+	15674	9154	18068	8786	9975	11013
SL1344_RS05880	plsX	WP_000508419.1	CDS	1232325	1233374	+	4576	2386	4717	4828	4949	5457
SL1344_RS05885	fabH	WP_000288154.1	CDS	1233454	1234407	+	2110	1939	2387	2782	3066	3422
SL1344_RS05890	fabD	WP_000191343.1	CDS	1234423	1235352	+	3820	3487	3884	7667	10308	9423
SL1344_RS05895	fabG	WP_000007236.1	CDS	1235365	1236099	+	5501	5871	5829	8702	10325	11043
SL1344_RS05900	acpP	WP_000103754.1	CDS	1236255	1236491	+	17987	19392	18804	25176	29889	36002
SL1344_RS05905	fabF	WP_000044664.1	CDS	1236577	1237818	+	23871	20121	26545	17785	17017	19884
SL1344_RS05910	pabC	WP_000478660.1	CDS	1237942	1238751	+	814	947	729	1025	1266	1285
SL1344_RS05915	yceG	WP_000736475.1	CDS	1238754	1239776	+	930	723	745	1288	1489	1542
SL1344_RS05920	tmk	WP_000535399.1	CDS	1239766	1240407	+	805	846	688	1250	1423	1544
SL1344_RS05925	holB	WP_000872453.1	CDS	1240404	1241408	+	918	1119	868	1436	1621	1707
SL1344_RS05930	ycfH	WP_000480277.1	CDS	1241419	1242216	+	1116	1035	917	4031	4731	5402
ncRNA0190	STnc680		sRNA	1242408	1242503	+	2161	1773	2530	2225	2038	2432
SL1344_RS05935	ptsG	WP_000475705.1	CDS	1242511	1243944	+	9515	8878	10399	10166	9374	11364
SL1344_RS05940	fhuE	WP_000008410.1	CDS	1244029	1246203	-	115	66	99	6312	7445	7240
SL1344_RS05945	ycfF	WP_001532068.1	CDS	1246545	1246904	+	1133	1535	1245	2617	3020	3370
SL1344_RS05950	ycfL	WP_000589563.1	CDS	1246907	1247281	+	1218	2209	1201	2414	2573	2806
SL1344_RS05955	ycfM	WP_000164359.1	CDS	1247295	1247933	+	1346	1384	1214	2224	2608	3008
SL1344_RS05960	thiK	WP_001257342.1	CDS	1247914	1248738	+	779	1112	789	1734	1834	2283
SL1344_RS05965	nagZ	WP_000529340.1	CDS	1248749	1249774	+	1175	1633	1338	1591	1975	2296
SL1344_RS05970	ycfP	WP_000587943.1	CDS	1249799	1250341	+	3412	3858	4289	3335	3650	4338
SL1344_RS05975	ndh	WP_000211053.1	CDS	1250596	1251900	+	792	836	862	2102	3428	3858
SL1344_RS05980	ycfJ	WP_001043449.1	CDS	1252079	1252618	+	274	363	149	296	413	595
ncRNA0221	STnc1090		sRNA	1252560	1252626	-	87	108	99	300	336	355
ncRNA0205	STnc850		sRNA	1252605	1252674	+	61	65	28	61	82	144
SL1344_RS05985	ycfQ	WP_000205990.1	CDS	1252693	1253328	-	1829	1349	1854	2491	3123	3323
SL1344_RS05990	ycfR	WP_000800159.1	CDS	1253570	1253827	+	353	194	317	1532	2530	2038
SL1344_RS05995	ycfS	WP_000482967.1	CDS	1253924	1254889	-	858	702	595	565	657	718
ncRNA0318	STnc3410		sRNA	1254996	1255077	-	246	217	225	383	333	420
SL1344_RS06000	mfd	WP_001114323.1	CDS	1255037	1258483	-	3152	3073	3158	5328	5434	6279
SL1344_RS06005	ycfU	WP_001518787.1	CDS	1258821	1260020	+	975	857	1020	1939	2291	2388
SL1344_RS06010	lolD	WP_001033714.1	CDS	1260013	1260714	+	975	962	961	924	1060	1160
SL1344_RS06015	ycfW	WP_000168091.1	CDS	1260714	1261958	+	1089	1175	1247	1519	1794	1935
SL1344_RS06020	ycfX	WP_000291338.1	CDS	1261987	1262898	+	1310	2005	1431	2229	2839	2990
SL1344_RS06025	cobB	WP_001191856.1	CDS	1262917	1263738	+	2406	2260	2189	2309	2712	2902
SL1344_RS06030	potD	WP_000759329.1	CDS	1263820	1264866	-	2657	1790	2971	9206	13365	11287
SL1344_RS06035	potC	WP_000580299.1	CDS	1264891	1265670	-	552	403	707	3942	5569	4344
SL1344_RS06040	sifA	WP_001520468.1	CDS	1265986	1266996	-	204	149	272	11138	17746	12999
SL1344_RS06045	potB	WP_000799391.1	CDS	1267325	1268188	-	315	240	484	543	714	686
SL1344_RS06050	potA	WP_000531607.1	CDS	1268172	1269308	-	475	492	742	1002	1292	1271
SL1344_RS06055	pepT	WP_000359410.1	CDS	1269559	1270788	+	1517	4099	4127	819	998	1082
ncRNA0171	STnc490b		sRNA	1270920	1271007	-	6	6	11	23	20	25
SL1344_RS06060	SL1344_1166	WP_000502119.1	CDS	1270999	1271457	+	33	29	33	66	89	93
ncRNA0430	StyR-103b		sRNA	1271296	1271403	-	0	3	0	3	1	1
ncRNA0409	StyR-24b		sRNA	1271409	1271566	+	36	22	35	45	57	64
SL1344_RS06065		WP_001113672.1	CDS	1271548	1272837	+	241	214	302	379	489	535
SL1344_RS06070	ycfD	WP_000456516.1	CDS	1272877	1273998	-	2139	1951	2194	4973	4966	5674
SL1344_RS06075	phoQ	WP_001031687.1	CDS	1274079	1275542	-	7909	7525	7327	27838	32566	32979
SL1344_RS06080	phoP	WP_001537766.1	CDS	1275542	1276213	-	19276	17433	17292	31422	38976	38604
SL1344_RS06085	purB	WP_000423763.1	CDS	1276340	1277710	-	1602	929	1928	5183	6189	5734
SL1344_RS06090	ycfC	WP_001519653.1	CDS	1277714	1278355	-	888	773	1261	2293	2775	2336
SL1344_RS06095	mnmA	WP_000004541.1	CDS	1278442	1279548	-	1877	1475	2119	3933	4657	4690
SL1344_RS06100	ymfB	WP_000476067.1	CDS	1279602	1280063	-	314	380	307	621	656	697
SL1344_RS06105	SL1344_1174	WP_000825957.1	CDS	1280075	1280404	-	283	280	225	474	485	536
SL1344_RS06110	rluB	WP_001249412.1	CDS	1280401	1281066	-	281	291	218	788	892	966
SL1344_RS06115	icdA	WP_000444508.1	CDS	1281238	1282488	+	60002	48866	37327	17015	14984	18107
ncRNA0140	STnc150		sRNA	1282503	1282686	-	245	323	155	1470	2418	2217
ncRNA0186	STnc640		sRNA	1282751	1282935	+	231	273	138	346	486	395
SL1344_RS06120	SL1344_1177	WP_000917257.1	CDS	1282936	1284060	+	2060	2324	1158	1350	1553	1576
SL1344_RS06125		WP_000787622.1	CDS	1284517	1284720	-	133	55	52	21	79	68
SL1344_RS06130	envF	WP_001033407.1	CDS	1285042	1285830	-	71	47	33	92	93	98
ncRNA0028	IsrC		sRNA	1285997	1286284	+	61	53	53	153	186	210
SL1344_RS06135	msgA	WP_000497451.1	CDS	1286319	1286558	-	522	613	570	1867	2380	2169
SL1344_RS06140	envE	WP_001520581.1	CDS	1286749	1287270	-	479	495	493	1712	2743	2675
ncRNA0055	RaoN		sRNA	1287312	1287455	-	101	79	98	750	1056	1012
SL1344_RS06145	cspH	WP_001537306.1	CDS	1287685	1287897	-	16	13	25	1319	1657	1787
SL1344_RS06150	pagD	WP_001535993.1	CDS	1288029	1288292	-	139	146	98	4709	6891	6445
SL1344_RS06155		gbkey=CDS	CDS	1288341	1288532	+	7	9	9	135	168	163
ncRNA0178	STnc510		sRNA	1288534	1289103	+	891	1162	570	20884	31540	30096
SL1344_RS06160		WP_014344031.1	CDS	1288596	1288703	+	124	330	96	5649	8583	8327
SL1344_RS06165	pagC	WP_000789471.1	CDS	1289104	1289661	+	5494	9046	3514	76548	126158	127337
ncRNA0319	STnc3420		sRNA	1289667	1289799	-	54	73	39	51	44	39
SL1344_RS06170		gbkey=CDS	CDS	1289672	1289843	-	55	73	41	55	45	39
SL1344_RS06175		1290101..1290103)	tRNA	1290067	1290143	+	89	70	73	111	130	91
ncRNA0379	SLnc0014		sRNA	1290168	1290467	+	4451	4951	3501	1044	1353	1152
ncRNA0179	STnc520		sRNA	1290590	1290674	-	921	573	661	240	291	322
SL1344_RS06180	pliC	WP_000977725.1	CDS	1290898	1291242	-	3375	2472	2608	2981	3492	3877
SL1344_RS06185		WP_001580445.1	CDS	1291311	1291400	+	44	52	44	70	95	107
ncRNA0117	sRNA16		sRNA	1291395	1291605	-	305	392	331	548	632	639
SL1344_RS06190		WP_001589102.1	CDS	1291455	1291544	+	54	88	50	146	191	219
SL1344_RS06195		WP_000758946.1	CDS	1291620	1291745	+	2134	3451	1540	1919	2663	2649
SL1344_RS06200	SL1344_1186	WP_000480529.1	CDS	1291945	1292217	+	211	192	158	148	193	151
SL1344_RS06205	SL1344_1187	WP_001218118.1	CDS	1292369	1292836	+	5436	3940	6598	4034	4855	5006
ncRNA0267	STnc1760		sRNA	1292835	1292935	-	42	40	34	61	86	99
SL1344_RS06210		WP_001596461.1	CDS	1292945	1293094	-	19	25	21	45	64	46
ncRNA0230	STnc1210		sRNA	1292947	1293012	+	48	37	54	59	80	64
SL1344_RS06215	SL1344_1188	WP_000761746.1	CDS	1293175	1294218	+	265	346	284	2058	3105	2950
ncRNA0467	StyR-285		sRNA	1294019	1294128	-	14	13	14	312	272	289
SL1344_RS06220	SL1344_1189	WP_000929982.1	CDS	1294301	1294831	-	1606	959	1177	9568	9901	10324
ncRNA0274	STnc1990		sRNA	1294843	1294986	+	63	72	81	282	246	351
ncRNA0320	STnc3430		sRNA	1294946	1295057	-	962	540	475	236	252	279
SL1344_RS06225	SL1344_1190	WP_000182479.1	CDS	1294980	1295294	-	2423	1735	1340	593	582	697
ncRNA0193	STnc720		sRNA	1295333	1295432	-	562	502	407	316	445	389
SL1344_RS06230	SL1344_1191	WP_000946082.1	CDS	1295976	1297610	+	3216	2949	23893	565	713	718
SL1344_RS06235	SL1344_1192	WP_001520270.1	CDS	1297610	1298584	+	892	994	6293	266	250	257
SL1344_RS06240	SL1344_1193	WP_000966645.1	CDS	1298574	1299386	+	181	236	961	124	125	132
SL1344_RS06245	SL1344_1194	WP_000950207.1	CDS	1299380	1300177	+	229	275	1087	156	210	212
SL1344_RS06250	SL1344_1195	WP_000947460.1	CDS	1300171	1300761	+	243	171	1006	106	134	172
SL1344_RS06255	SL1344_1196	WP_000456065.1	CDS	1300843	1301976	-	270	265	166	1593	1831	2183
SL1344_RS06260	SL1344_1197	WP_001183702.1	CDS	1302170	1302496	+	389	393	227	1346	1550	1957
SL1344_RS06265		1302539..1302541)	tRNA	1302505	1302581	+	147	112	91	648	623	881
ncRNA0029	IsrD		sRNA	1302592	1302640	-	1	1	2	2	1	0
SL1344_RS06270	SL1344_1198	WP_000234685.1	CDS	1302690	1303340	+	357	215	261	601	665	791
ncRNA0321	STnc3440		sRNA	1303294	1303380	+	63	43	45	112	110	120
SL1344_RS06275	aadA	WP_000175803.1	CDS	1303449	1304237	+	405	486	365	836	988	1034
SL1344_RS06280	SL1344_1200	WP_001201482.1	CDS	1304328	1304975	+	66	46	34	710	660	867
SL1344_RS06285	SL1344_1201	WP_000190263.1	CDS	1305044	1305892	+	464	287	463	1203	1274	1448
SL1344_RS06290	SL1344_1202	WP_000208089.1	CDS	1306147	1306395	-	961	1315	614	20160	22388	25954
SL1344_RS06295	SL1344_1203	WP_000908464.1	CDS	1306474	1306623	-	30	33	30	49	47	62
SL1344_RS06300	aroQ	WP_000617985.1	CDS	1306706	1307251	+	625	464	614	15094	20726	20212
SL1344_RS06305	yeaS	WP_000457190.1	CDS	1307448	1308086	+	593	617	655	4976	6567	7413
SL1344_RS06310		gbkey=CDS	CDS	1308259	1308620	+	207	134	202	211	241	312
SL1344_RS06315	yoaG	WP_000513733.1	CDS	1308623	1308805	+	770	563	669	642	661	719
SL1344_RS06320	SL1344_1208	WP_000762776.1	CDS	1309035	1309676	+	69	103	90	135	195	194
ncRNA0030	IsrE		sRNA	1309727	1309824	-	92	82	127	39937	35276	37751
SL1344_RS06325	SL1344_1209	WP_001520194.1	CDS	1309798	1309983	+	184	407	135	1042	1179	1858
SL1344_RS06330	yeaQ	WP_000512149.1	CDS	1309991	1310239	+	1169	2932	794	6955	8175	12183
SL1344_RS06335	yaoF	WP_000673492.1	CDS	1310672	1310923	+	821	1031	756	2207	3055	2720
SL1344_RS06340	SL1344_1212	WP_000487126.1	CDS	1310992	1311303	+	1397	1433	1454	3201	3622	3572
SL1344_RS06345	yeaO	WP_001222527.1	CDS	1311289	1311636	-	676	505	658	530	676	662
SL1344_RS06350	yeaN	WP_000205341.1	CDS	1311755	1312939	-	122	71	125	198	199	226
SL1344_RS06355	yeaM	WP_000579793.1	CDS	1313040	1313834	+	242	194	205	449	470	527
SL1344_RS06360	yeaL	WP_000460698.1	CDS	1313814	1314260	-	150	132	136	224	236	258
SL1344_RS06365		WP_000272241.1	CDS	1314466	1314573	+	9	16	19	35	38	42
SL1344_RS06370	yeaK	WP_000829539.1	CDS	1314570	1315097	-	559	469	536	585	601	741
SL1344_RS06375	yeaJ	WP_001048646.1	CDS	1315138	1316631	-	593	539	589	756	841	850
ncRNA0180	STnc530		sRNA	1317058	1317158	-	19	13	19	50	50	78
SL1344_RS06380	yeaH	WP_000219714.1	CDS	1317272	1318558	-	1799	2423	1229	5659	5766	7936
SL1344_RS06385	yeaG	WP_001518010.1	CDS	1318681	1320615	-	3555	5514	1556	11645	11964	16000
SL1344_RS06390	mipA	WP_000163762.1	CDS	1321042	1321788	+	14483	12707	12731	10153	13997	12897
SL1344_RS06395	SL1344_1222	WP_000029246.1	CDS	1322078	1323274	+	95	86	77	228	268	276
SL1344_RS06400	SL1344_1223	WP_000800317.1	CDS	1323380	1324228	+	710	821	713	458	536	569
SL1344_RS06405	yeaD	WP_000608662.1	CDS	1324327	1325211	-	1390	1035	1850	1856	2064	2296
ncRNA0502	RUF_341c.2		sRNA	1325422	1325551	+	53	44	65	77	67	53
SL1344_RS06410	gapA	WP_000153505.1	CDS	1325546	1326541	-	46832	38600	58141	54696	59966	71977
SL1344_RS06415	yeaA	WP_001519539.1	CDS	1326883	1327296	+	5063	3219	3084	2029	2086	2412
SL1344_RS06420	yeaC	WP_001046864.1	CDS	1327338	1327616	+	5840	4754	3538	2190	2390	2767
SL1344_RS06425	nam	WP_000184708.1	CDS	1327968	1328624	-	548	772	560	579	683	768
SL1344_RS06430	ansA	WP_001170134.1	CDS	1328651	1329667	-	539	502	600	788	907	1031
SL1344_RS06435	sppA	WP_001259876.1	CDS	1329763	1331619	-	2356	1621	2175	2629	2555	2947
SL1344_RS06440	ydjA	WP_000339313.1	CDS	1331793	1332344	+	896	1271	816	744	912	1011
SL1344_RS06445	selD	WP_001294900.1	CDS	1332462	1333505	+	2750	2988	2376	1561	1670	1882
SL1344_RS06450	topB	WP_001235865.1	CDS	1333510	1335459	+	3767	4169	3446	2359	2419	2873
SL1344_RS06455	gdhA	WP_000372869.1	CDS	1335489	1336832	-	1360	1692	1227	2270	1763	2584
SL1344_RS06460	SL1344_1235	WP_001254681.1	CDS	1337071	1337346	+	3538	2518	3071	382	341	426
SL1344_RS06465	SL1344_1236	WP_000592132.1	CDS	1337306	1337722	-	182	162	181	275	287	318
SL1344_RS06470	xthA	WP_000673954.1	CDS	1337795	1338601	-	1872	1555	1689	1409	1510	1556
SL1344_RS06475	argDa	WP_000059493.1	CDS	1339047	1340273	+	2300	3035	214	373	279	391
SL1344_RS06480	astA	WP_001263889.1	CDS	1340264	1341298	+	1476	2643	156	247	241	345
SL1344_RS06485	astD	WP_000177268.1	CDS	1341295	1342773	+	1173	3874	212	390	355	480
SL1344_RS06490	astB	WP_000123952.1	CDS	1342770	1344113	+	376	2198	156	353	448	518
SL1344_RS06495	astE	WP_000368454.1	CDS	1344106	1345074	+	157	1522	133	323	297	367
SL1344_RS06500	SL1344_1243	WP_001228998.1	CDS	1345410	1345895	+	1352	1792	858	2279	2668	2800
ncRNA0257	STnc1640		sRNA	1345903	1345970	+	392	465	236	623	644	720
SL1344_RS06505	SL1344_1244	WP_001526281.1	CDS	1345970	1346851	-	356	336	450	710	790	866
SL1344_RS06510	nadE	WP_000174981.1	CDS	1346972	1347799	-	3181	2176	2583	4321	4344	5486
SL1344_RS06515	osmE	WP_001039301.1	CDS	1348018	1348359	+	6283	6942	3560	10332	9776	14693
SL1344_RS06520	celA	WP_000412161.1	CDS	1348660	1348980	+	1330	1147	1350	1069	1177	1233
SL1344_RS06525	celB	WP_000073064.1	CDS	1349063	1350421	+	952	1115	830	571	704	737
SL1344_RS06530	celC	WP_000459883.1	CDS	1350472	1350819	+	312	350	258	409	556	629
SL1344_RS06535	celD	WP_001537753.1	CDS	1350833	1351672	+	544	644	565	821	1097	1201
SL1344_RS06540	celF	WP_000078785.1	CDS	1351797	1353152	+	347	333	272	301	350	354
SL1344_RS06545	celG	WP_000442738.1	CDS	1353165	1353923	+	673	565	546	522	604	633
ncRNA0276	STnc2010		sRNA	1353824	1353961	+	379	238	284	229	225	241
SL1344_RS06550	katE	WP_000019119.1	CDS	1353967	1356219	-	3424	4444	1875	5841	5550	7767
SL1344_RS06555	cedA	WP_000977510.1	CDS	1356584	1356826	+	179	116	172	334	413	428
SL1344_RS06560	ydjN	WP_001010662.1	CDS	1356928	1358319	-	3077	2981	877	13231	14273	16112
SL1344_RS06565	ydjM	WP_000123140.1	CDS	1358456	1359043	-	137	73	102	367	335	364
ncRNA0021	Ig1085		sRNA	1358936	1359182	+	82	141	117	176	192	234
SL1344_RS06570	yniC	WP_000106848.1	CDS	1359193	1359861	-	1543	1314	1471	3301	3866	3830
SL1344_RS06575	yniB	WP_000222158.1	CDS	1360010	1360546	+	726	660	656	1303	1527	1715
SL1344_RS06580	SL1344_1259	WP_000267686.1	CDS	1360589	1361449	-	2055	2128	1801	1809	1821	2344
SL1344_RS06585	ydiZ	WP_000146127.1	CDS	1361556	1361846	-	188	276	147	436	439	568
SL1344_RS06590	pfkB	WP_000251707.1	CDS	1361943	1362875	-	5522	4995	3962	6524	6345	8036
SL1344_RS06595	ydiY	WP_000770981.1	CDS	1363164	1363922	+	517	375	554	1244	1501	1511
ncRNA0322	STnc3460		sRNA	1363845	1363959	+	412	312	426	756	964	999
ncRNA0370	STnc4210		sRNA	1363927	1363997	-	2409	2326	1393	511	728	631
SL1344_RS06600	SL1344_1263	WP_001046438.1	CDS	1363971	1364930	-	15685	13656	9268	4011	5953	5160
SL1344_RS06605	SL1344_1264	WP_000916602.1	CDS	1365073	1365387	+	483	580	383	3233	5145	4144
SL1344_RS06610	SL1344_1265	WP_001044098.1	CDS	1365384	1366238	+	1695	1959	1226	9879	15037	12935
SL1344_RS06615	SL1344_1330A	WP_011233063.1	CDS	1366411	1366617	+	29	12	43	152	193	196
SL1344_RS06620	rfc	WP_000905564.1	CDS	1366940	1368163	-	1313	835	1199	1289	1248	1516
ncRNA0487	StyR-362		sRNA	1368274	1368412	+	7	26	9	98	115	122
SL1344_RS06625	thrS	WP_001144223.1	CDS	1369055	1370983	+	17514	15419	19634	16749	18165	19349
SL1344_RS06630	infC	WP_001574431.1	CDS	1370987	1371529	+	71681	47640	81187	69927	74041	79792
SL1344_RS06635	rpl35	WP_001124225.1	CDS	1371625	1371822	+	68876	56722	77053	51790	49940	51862
SL1344_RS06640	rpl20	WP_000124850.1	CDS	1371873	1372229	+	60694	22377	68674	46345	51825	57450
SL1344_RS06645	pheS	WP_000018570.1	CDS	1372531	1373514	+	1596	1353	1850	2259	2750	2722
SL1344_RS06650	pheT	WP_000672400.1	CDS	1373530	1375917	+	7045	10000	6366	25236	32481	33119
SL1344_RS06655	himA	WP_001229266.1	CDS	1375922	1376221	+	10896	12187	9122	25347	30024	35973
ncRNA0181	STnc540		sRNA	1376238	1376364	+	4859	4377	3351	11927	12769	15594
SL1344_RS06660	btuC	WP_000954984.1	CDS	1376424	1377404	+	448	515	645	658	710	705
SL1344_RS06665	btuE	WP_001181565.1	CDS	1377496	1378047	+	446	488	376	1311	1492	1843
SL1344_RS06670	btuD	WP_000080602.1	CDS	1378047	1378796	+	319	452	347	1224	1438	1688
SL1344_RS06675	nlpC	WP_001213256.1	CDS	1378873	1379337	+	836	604	772	2754	3535	3595
SL1344_RS06680	ydiV	WP_000562009.1	CDS	1379651	1380364	+	279	301	189	2204	2743	2895
SL1344_RS06685	ydiU	WP_000175668.1	CDS	1380426	1381868	+	654	921	614	2845	3540	4264
SL1344_RS06690	ydiE	WP_000089115.1	CDS	1381903	1382094	-	16	10	23	1462	1533	1636
SL1344_RS06695	aroH	WP_001082196.1	CDS	1382251	1383297	-	955	689	872	1850	1766	2183
SL1344_RS06700	ydiA	WP_000370992.1	CDS	1383453	1384286	-	859	785	860	836	879	1151
SL1344_RS06705	pps	WP_000069340.1	CDS	1384623	1387001	+	33647	32551	26873	16075	16592	19552
SL1344_RS06710	ydiD	WP_000117497.1	CDS	1387043	1388683	-	123	125	143	340	411	505
SL1344_RS06715	ydiT	WP_000093362.1	CDS	1388773	1389066	-	5	22	14	23	38	58
SL1344_RS06720	ydiS	WP_001278565.1	CDS	1389063	1390349	-	53	57	49	125	156	129
SL1344_RS06725	ydiR	WP_001015871.1	CDS	1390406	1391341	-	76	85	77	1266	1657	1513
SL1344_RS06730	ydiQ	WP_000692106.1	CDS	1391363	1392127	-	33	22	34	30	57	40
SL1344_RS06735	ydiP	WP_000284836.1	CDS	1392590	1393480	+	85	73	52	118	73	140
SL1344_RS06740	ydiO	WP_000347819.1	CDS	1393556	1394707	-	244	229	243	286	281	361
SL1344_RS06745	ydiF	WP_000700596.1	CDS	1394721	1396316	-	85	69	84	121	165	152
SL1344_RS06750	aroD	WP_000860225.1	CDS	1396470	1397228	-	903	677	817	1013	1047	1195
SL1344_RS06755	aroE	WP_000383490.1	CDS	1397273	1398139	-	328	310	315	481	518	571
SL1344_RS06760		gbkey=CDS	CDS	1398221	1399440	-	216	116	270	147	152	185
SL1344_RS06765	ydiM	WP_000797677.1	CDS	1399804	1401015	-	42	54	32	67	82	97
SL1344_RS06770	ydiL	WP_000992441.1	CDS	1401156	1401512	-	18	28	22	45	64	52
SL1344_RS24815		RF00034	ncRNA	1401683	1401790	-	257	149	188	420	423	682
ncRNA0059	RprA		sRNA	1401685	1401790	-	256	149	188	420	423	682
SL1344_RS06775	ydiK	WP_000248615.1	CDS	1401973	1403091	-	1144	1314	965	1775	1898	2292
SL1344_RS06780	ydiJ	WP_000612921.1	CDS	1403356	1406412	+	2558	3005	2466	4258	4287	4835
SL1344_RS06785	SL1344_1300	WP_000637930.1	CDS	1406409	1406819	+	347	701	368	631	713	905
SL1344_RS06790	ydiH	WP_001537749.1	CDS	1406918	1407106	+	626	1269	1138	2626	2963	3116
ncRNA0064	RydB		sRNA	1407278	1407375	+	18	10	27	87	99	103
SL1344_RS06795	SL1344_1302	WP_000261866.1	CDS	1407394	1408740	-	685	392	788	436	474	499
SL1344_RS06800	sufA	WP_000418970.1	CDS	1409167	1409535	+	35	120	23	2091	2712	3489
SL1344_RS06805	sufB	WP_000089383.1	CDS	1409544	1411031	+	266	399	172	11233	12313	15526
SL1344_RS06810	sufC	WP_000948902.1	CDS	1411048	1411794	+	309	436	206	11117	11348	13971
SL1344_RS06815	sufD	WP_000907925.1	CDS	1411769	1413040	+	394	469	285	14125	15374	18979
SL1344_RS06820	sufS	WP_000143859.1	CDS	1413037	1414257	+	332	476	293	10649	11080	13677
SL1344_RS06825	ynhA	WP_000729468.1	CDS	1414270	1414686	+	109	154	124	3816	4006	5087
SL1344_RS06830	ynhG	WP_000817059.1	CDS	1414841	1415842	+	1409	1303	1036	5363	5528	6874
SL1344_RS06835	lppB	WP_001082332.1	CDS	1415909	1416148	-	1046	429	921	872	930	961
SL1344_RS06840	lpp	WP_001082307.1	CDS	1416231	1416467	-	714650	461109	637829	330762	283787	388530
SL1344_RS06845	pykF	WP_000751447.1	CDS	1416778	1418190	-	3522	3661	3537	12399	14315	16450
SL1344_RS06850	orf48	WP_000756089.1	CDS	1418592	1419935	-	513	585	473	199	228	256
SL1344_RS06855	orf32	WP_001000510.1	CDS	1419957	1420850	-	165	200	227	37	51	54
SL1344_RS06860	orf245	WP_000697187.1	CDS	1420909	1421646	-	732	622	709	37	70	63
SL1344_RS06865	orf408	WP_000471807.1	CDS	1421658	1422884	-	647	474	673	49	72	55
SL1344_RS06870	ttrA	WP_000002375.1	CDS	1423207	1426269	-	177	152	197	286	305	309
SL1344_RS06875	ttrC	WP_000149754.1	CDS	1426262	1427284	-	19	23	16	56	36	32
SL1344_RS06880	ttrB	WP_001523928.1	CDS	1427285	1428019	-	18	18	25	33	27	38
SL1344_RS06885	ttrS	WP_001542069.1	CDS	1428231	1429979	+	2498	2545	2667	1082	1243	1344
SL1344_RS06890	ttrR	WP_000190927.1	CDS	1429954	1430574	+	445	531	535	278	398	426
SL1344_RS06895	orf70	WP_000165779.1	CDS	1430672	1430884	+	245	309	258	192	224	258
SL1344_RS06900	orf319	WP_001060729.1	CDS	1430980	1431939	-	3361	4204	2239	8962	8095	11798
SL1344_RS06905	orf242	WP_000122327.1	CDS	1432112	1432840	-	382	427	353	3245	4600	4077
SL1344_RS06910	ssrB	WP_000666335.1	CDS	1433019	1433657	-	600	950	484	6032	9237	8223
SL1344_RS06915	ssrA	WP_001050769.1	CDS	1433688	1436450	-	1835	1886	1264	11493	16867	14362
ncRNA0222	STnc1100		sRNA	1435601	1435729	+	24	28	24	119	135	143
SL1344_RS06920	ssaB	WP_001738217.1	CDS	1436851	1437252	+	22	9	23	3555	5385	4271
SL1344_RS06925	ssaC	WP_000261284.1	CDS	1437254	1438747	+	88	116	68	6759	10704	8723
SL1344_RS06930	ssaD	WP_000323786.1	CDS	1438728	1439939	+	85	107	47	5105	8629	8155
SL1344_RS06935	ssaE	WP_000210202.1	CDS	1439947	1440189	+	67	66	44	5695	9172	7700
ncRNA0479	StyR-327		sRNA	1440136	1440315	+	36	32	28	5500	8823	6824
SL1344_RS06940	sseA	WP_001738219.1	CDS	1440453	1440779	+	87	173	81	17019	29595	23611
SL1344_RS06945	sseBa	WP_000094422.1	CDS	1440786	1441376	+	108	208	108	16971	30445	25595
SL1344_RS06950	sscA	WP_000711029.1	CDS	1441373	1441846	+	88	101	73	9670	17255	14184
SL1344_RS06955	sseC	WP_001079760.1	CDS	1441849	1443303	+	193	364	167	14705	24430	21177
SL1344_RS06960	sseD	WP_000388323.1	CDS	1443319	1443906	+	80	94	53	3066	5862	5153
SL1344_RS06965	sseE	WP_000249606.1	CDS	1443909	1444325	+	65	114	74	6285	10832	9287
SL1344_RS06970	sscB	WP_000979963.1	CDS	1444377	1444811	+	108	141	98	6972	11248	9221
SL1344_RS06975	sseF	WP_000690718.1	CDS	1444827	1445609	+	64	75	75	5088	7976	6587
SL1344_RS06980	sseG	WP_000805851.1	CDS	1445606	1446295	+	135	161	173	3307	4762	4044
SL1344_RS06985	ssaG	WP_000350226.1	CDS	1446389	1446604	+	29	61	22	7463	12301	9630
SL1344_RS06990		WP_000444713.1	CDS	1446582	1446872	+	42	63	22	12175	19481	15726
SL1344_RS06995	ssaI	WP_001574409.1	CDS	1446884	1447132	+	39	45	22	13206	21063	17112
SL1344_RS07000	ssaJ	WP_000862874.1	CDS	1447129	1447878	+	81	153	50	27602	42679	35609
SL1344_RS07005	SL1344_1344	WP_001526945.1	CDS	1447896	1448444	+	56	95	61	15491	24498	21207
SL1344_RS07010	ssaK	WP_000011201.1	CDS	1448441	1449115	+	56	79	37	11270	17378	14865
ncRNA0231	STnc1220		sRNA	1448718	1448790	-	8	0	4	16	11	17
SL1344_RS07015	ssaL	WP_043942462.1	CDS	1449132	1450097	+	109	195	87	15273	24928	22087
SL1344_RS07020	ssaM	WP_000383702.1	CDS	1450155	1450523	+	33	32	24	7375	12632	9992
SL1344_RS07025	ssaV	WP_001258231.1	CDS	1450508	1452553	+	195	196	159	15635	23804	20893
SL1344_RS07030	ssaN	WP_000787213.1	CDS	1452543	1453844	+	223	297	191	10600	17164	14981
SL1344_RS07035	ssaO	WP_000449089.1	CDS	1453847	1454224	+	87	88	72	2856	4796	4340
SL1344_RS07040	ssaP	WP_001223304.1	CDS	1454205	1454579	+	62	92	47	2174	3592	3481
SL1344_RS07045	ssaQ	WP_000944192.1	CDS	1454560	1455528	+	143	229	137	3380	5714	5571
SL1344_RS07050	ssaR	WP_000056367.1	CDS	1455596	1456243	+	68	84	87	15950	24594	20350
SL1344_RS07055	ssaS	WP_000999982.1	CDS	1456240	1456506	+	10	13	22	4396	6162	5469
SL1344_RS07060	ssaT	WP_000068764.1	CDS	1456507	1457286	+	35	39	47	6111	8251	7335
SL1344_RS07065	ssaU	WP_001291716.1	CDS	1457283	1458341	+	83	77	69	2400	3319	3156
SL1344_RS07070		complement(1458539..1458541))	tRNA	1458499	1458575	-	449	380	488	640	610	639
SL1344_RS07075		complement(1458626..1458628))	tRNA	1458586	1458662	-	1046	1488	926	827	812	790
SL1344_RS07080	norM	WP_001175077.1	CDS	1458814	1460187	-	1515	1384	1414	2167	2467	2776
SL1344_RS07085	ribE	WP_000493971.1	CDS	1460404	1461045	+	656	980	597	2072	2999	3095
SL1344_RS07090	cfa	WP_000098879.1	CDS	1461087	1462235	-	1847	2329	1369	10517	10904	14360
ncRNA0194	STnc730		sRNA	1462356	1462446	-	747	635	821	2145	2055	2861
SL1344_RS07095	ydhC	WP_001182309.1	CDS	1462525	1463730	-	289	299	323	262	287	279
SL1344_RS07100	ydhB	WP_000269523.1	CDS	1463843	1464775	+	161	272	187	173	220	260
SL1344_RS07105	purR	WP_000190993.1	CDS	1464772	1465797	-	666	531	801	2462	2924	2765
ncRNA0371	STnc4220		sRNA	1464776	1464883	-	182	139	214	577	686	681
SL1344_RS07110	sodB	WP_000007301.1	CDS	1466265	1466846	-	15204	24791	13031	512	757	719
SL1344_RS07115	ydhO	WP_001520344.1	CDS	1466973	1467794	-	1716	1120	1721	3664	4148	4531
SL1344_RS07120	ydhD	WP_000108176.1	CDS	1468129	1468476	+	10300	7711	8046	3289	3658	3774
SL1344_RS07125	rnt	WP_001282267.1	CDS	1468554	1469201	-	505	350	484	1154	1303	1326
SL1344_RS07130	gloA	WP_001237787.1	CDS	1469302	1469709	-	1506	1712	1408	2459	2751	3527
SL1344_RS07135	nemA	WP_000092932.1	CDS	1469778	1470875	-	1268	994	1115	3141	3461	4451
SL1344_RS07140	ydhM	WP_001041823.1	CDS	1470934	1471533	-	275	260	257	1012	968	1180
SL1344_RS07145	ydhL	WP_001519323.1	CDS	1471636	1471875	+	167	189	123	760	841	1085
SL1344_RS07150	ydhF	WP_000250717.1	CDS	1471926	1472822	+	1291	1062	1254	875	799	1043
SL1344_RS07155	sodCb	WP_000826819.1	CDS	1472902	1473423	+	995	1140	666	2944	3143	4425
SL1344_RS07160	SL1344_1373	WP_000777608.1	CDS	1473399	1475438	-	325	297	333	856	1110	1133
SL1344_RS07165	ydhJ	WP_001520441.1	CDS	1475438	1476298	-	296	153	286	899	1027	1038
SL1344_RS07170	ydhI	WP_000649755.1	CDS	1476301	1476537	-	62	36	77	282	354	318
SL1344_RS07175	slyA	WP_001675558.1	CDS	1476738	1477172	+	7900	9378	6691	16435	22812	22504
SL1344_RS07180	slyB	WP_000597179.1	CDS	1477220	1477687	-	4334	6260	3459	6428	7602	9674
SL1344_RS07185	anmK	WP_000835011.1	CDS	1477959	1479080	+	692	896	535	864	990	1084
SL1344_RS07190	mliC	WP_001132086.1	CDS	1479168	1479497	+	636	460	615	694	771	845
SL1344_RS07195	pdxH	WP_001282334.1	CDS	1479556	1480212	+	963	747	1232	1936	2281	2308
SL1344_RS07200	tyrS	WP_000168626.1	CDS	1480339	1481613	+	5870	3754	6634	9183	9450	10376
SL1344_RS07205	pdxY	WP_000789732.1	CDS	1481673	1482533	+	1177	759	1602	2080	2185	2535
SL1344_RS07210	gst	WP_000765727.1	CDS	1482592	1483197	-	3454	2797	3118	1033	1011	1342
SL1344_RS07215	tppB	WP_000100911.1	CDS	1483302	1484807	-	4531	3090	5453	2227	2607	2778
SL1344_RS07220	nth	WP_001030315.1	CDS	1485409	1486044	-	532	457	669	1798	2176	2132
SL1344_RS07225	rnfE	WP_001289628.1	CDS	1486044	1486736	-	608	504	685	1618	1981	2046
SL1344_RS07230	rnfG	WP_000920822.1	CDS	1486739	1487359	-	524	352	539	1658	1989	2053
SL1344_RS07235	rnfD	WP_000231891.1	CDS	1487363	1488421	-	452	293	567	1274	1527	1560
SL1344_RS07240	rnfC	WP_000915668.1	CDS	1488422	1490629	-	893	760	1124	3465	3877	4076
SL1344_RS07245	rnfB	WP_001092597.1	CDS	1490622	1491200	-	228	188	289	1207	1477	1549
SL1344_RS07250	rnfA	WP_000133179.1	CDS	1491200	1491781	-	553	331	668	2885	3282	3119
SL1344_RS07255	ydgK	WP_000214061.1	CDS	1491858	1492298	-	830	467	940	4609	5535	5253
SL1344_RS07260	ydgT	WP_000217946.1	CDS	1492387	1492602	-	537	423	689	4047	5316	4486
ncRNA0386	SLnc0048		sRNA	1492616	1492703	+	199	195	178	67	47	86
SL1344_RS07265	blr	WP_001708800.1	CDS	1492900	1493025	-	145	99	170	843	937	994
SL1344_RS07270	ydgJ	WP_000998242.1	CDS	1493233	1494273	+	2320	2189	2071	3315	3779	4101
SL1344_RS07275	add	WP_000565569.1	CDS	1494348	1495349	-	1692	1259	1637	1733	2063	2061
ncRNA0325	STnc3500		sRNA	1495398	1495512	+	22	32	39	78	106	101
SL1344_RS07280		WP_001580145.1	CDS	1495715	1495864	-	108	154	124	571	539	694
SL1344_RS07285	ydgA	WP_000753326.1	CDS	1496053	1497561	-	3459	3348	2782	6776	7507	8800
SL1344_RS07290	manA	WP_001170627.1	CDS	1497664	1498839	-	1998	1351	2180	1962	2419	2399
SL1344_RS07295	fumA	WP_000066601.1	CDS	1499039	1500685	+	19896	18676	14141	1747	1624	1920
SL1344_RS07300	fumC	WP_000259121.1	CDS	1500853	1502256	+	5987	6032	3504	3987	4136	5287
SL1344_RS07305	tus	WP_000092490.1	CDS	1502253	1503182	-	380	332	335	386	316	428
ncRNA0459	StyR-248		sRNA	1502537	1502747	+	107	178	79	221	255	303
SL1344_RS07310	rstB	WP_000732951.1	CDS	1503258	1504559	-	267	211	322	577	762	691
SL1344_RS07315	SL1344_1403	WP_001542099.1	CDS	1504670	1506370	-	61	68	54	248	242	308
ncRNA0326	STnc3510		sRNA	1506478	1506597	-	218	159	211	197	272	256
SL1344_RS07320	ompN	WP_000824309.1	CDS	1506529	1507662	-	483	350	515	341	452	474
SL1344_RS07325		WP_001674943.1	CDS	1507779	1507964	+	14	8	10	12	13	12
SL1344_RS07330	rstA	WP_001080048.1	CDS	1508142	1508873	-	1557	1055	1501	6913	7757	7997
SL1344_RS07335	ydgC	WP_000524877.1	CDS	1509000	1509335	+	129	93	100	92	104	106
SL1344_RS07340	ydgI	WP_000412353.1	CDS	1509397	1510779	-	156	158	197	470	471	593
SL1344_RS07345	ydgH	WP_000769294.1	CDS	1511078	1512022	-	5372	3122	5271	2809	2761	3084
SL1344_RS07350	pntA	WP_001219362.1	CDS	1512549	1514078	+	5200	4401	5458	4863	5356	5597
SL1344_RS07355	pntB	WP_000014056.1	CDS	1514089	1515477	+	4886	5179	5130	4352	4769	5354
SL1344_RS07360	tqsA	WP_001118268.1	CDS	1515652	1516686	-	220	229	273	306	411	403
SL1344_RS07365	ydgF	WP_000500278.1	CDS	1517104	1517466	+	214	234	244	136	158	182
SL1344_RS07370	ydgE	WP_001183821.1	CDS	1517453	1517782	+	306	299	330	138	137	200
SL1344_RS07375	SL1344_1414	WP_000549642.1	CDS	1517822	1518643	-	1248	1415	747	929	957	1162
SL1344_RS07380	asr	WP_000756314.1	CDS	1518912	1519160	-	239	203	235	37278	35291	43065
ncRNA0323	STnc3480		sRNA	1519287	1519550	+	23	18	15	41	65	78
SL1344_RS07385	ynfM	WP_000091796.1	CDS	1519555	1520808	-	299	349	414	1653	1656	2274
SL1344_RS07390	ynfL	WP_001019577.1	CDS	1520928	1521827	+	151	191	121	202	242	262
SL1344_RS07395	mlc	WP_000225097.1	CDS	1521955	1523175	+	1464	1494	1774	1011	1071	1270
SL1344_RS07400	bioDb	WP_000919233.1	CDS	1523301	1523996	+	391	1282	1323	305	460	443
SL1344_RS07405	clcB	WP_000554911.1	CDS	1523952	1525241	-	140	176	181	506	528	523
SL1344_RS07410	SL1344_1421	WP_000593086.1	CDS	1525377	1526525	-	579	655	347	1951	2204	2714
SL1344_RS07415	SL1344_1422	WP_000379677.1	CDS	1526525	1527172	-	165	236	109	619	709	893
SL1344_RS07420	SL1344_1423	WP_001211193.1	CDS	1527182	1528084	-	123	208	55	573	617	751
SL1344_RS07425	SL1344_1424	WP_000557304.1	CDS	1528113	1528823	-	120	162	59	543	508	697
SL1344_RS07430	ynfI	WP_000206561.1	CDS	1529128	1529742	-	746	601	861	1086	1193	1330
SL1344_RS07435	SL1344_1426	WP_000534700.1	CDS	1529785	1530642	-	553	526	691	1159	1515	1435
SL1344_RS07440	SL1344_1427	WP_000213064.1	CDS	1530644	1531261	-	118	119	176	24	25	34
SL1344_RS07445	dmsA2	WP_000705294.1	CDS	1531272	1533707	-	421	541	825	150	189	208
SL1344_RS07450	dmsA1	WP_001117602.1	CDS	1533806	1536244	-	340	944	1142	262	237	261
SL1344_RS07455	ynfD	WP_001517904.1	CDS	1536401	1536706	-	1428	1293	1162	1587	1835	1999
SL1344_RS07460	ynfC	WP_000743122.1	CDS	1536813	1537523	+	410	503	432	387	446	570
SL1344_RS07465	speG	WP_000199997.1	CDS	1537564	1538124	-	3008	2098	3317	2240	2470	2730
SL1344_RS07470	ynfB	WP_001066440.1	CDS	1538160	1538501	-	2456	1594	2347	1908	2003	2163
SL1344_RS07475	ynfA	WP_000921389.1	CDS	1538654	1538980	+	74	79	64	139	158	224
SL1344_RS07480	rspA	WP_000706264.1	CDS	1539102	1540316	+	632	451	500	107	104	122
SL1344_RS07485	rspB	WP_000836487.1	CDS	1540327	1541346	+	435	379	354	97	117	151
SL1344_RS07490		gbkey=CDS	CDS	1541400	1542779	+	483	480	419	101	117	110
SL1344_RS07495	ydfI	WP_001181258.1	CDS	1542923	1544389	+	468	729	450	1662	2296	2062
SL1344_RS07500	ydfZ	WP_000989267.1	CDS	1544456	1544659	-	4271	2142	5650	185	233	258
SL1344_RS07505	ydfH	WP_000215563.1	CDS	1544840	1545526	-	707	589	806	2416	2664	2799
SL1344_RS07510	ydfG	WP_000636564.1	CDS	1545656	1546402	-	4353	2855	3860	3931	4250	4867
SL1344_RS07515	dcp	WP_000106265.1	CDS	1546541	1548583	+	1287	1210	1232	1982	2260	2591
SL1344_RS07520	SL1344_1443	WP_000807642.1	CDS	1548928	1549110	+	72	123	32	732	1239	1720
SL1344_RS07525	ydeJ	WP_001235357.1	CDS	1549230	1549757	-	134	213	92	503	491	660
ncRNA0020	Ig959		sRNA	1550136	1550213	-	1	1	1	3	5	9
SL1344_RS07530	ydeI	WP_000776348.1	CDS	1550184	1550576	+	462	606	233	1365	1547	2047
ncRNA0046	MgrR		sRNA	1550746	1550843	+	1480	349	1569	3006	4117	4658
SL1344_RS07535		WP_000901531.1	CDS	1550924	1551019	-	3897	3525	2447	6227	8998	8772
SL1344_RS07540	ydeE	WP_001068050.1	CDS	1551267	1552454	-	232	225	230	397	382	494
SL1344_RS07545	ydeD	WP_001738238.1	CDS	1552685	1553584	+	202	324	175	277	321	391
ncRNA0286	STnc2170		sRNA	1553671	1553725	-	28	22	37	80	57	80
SL1344_RS07550	marB	WP_000783049.1	CDS	1553703	1553918	-	99	57	109	233	210	239
SL1344_RS07555	marA	WP_001576104.1	CDS	1553947	1554336	-	154	96	182	274	273	282
SL1344_RS07560	marR	WP_000843434.1	CDS	1554350	1554784	-	119	80	157	398	329	398
SL1344_RS07565	marC	WP_000968968.1	CDS	1555043	1555708	+	438	566	458	3782	5473	5134
SL1344_RS07570	sotB	WP_000154625.1	CDS	1555755	1556945	-	102	92	147	972	1201	1211
SL1344_RS07575	yneJ	WP_000366538.1	CDS	1557061	1557933	-	233	191	191	275	315	310
SL1344_RS07580	yneI	WP_000178397.1	CDS	1558036	1559424	+	247	340	217	245	261	274
SL1344_RS07585	yneH	WP_000090081.1	CDS	1559497	1560423	+	198	192	236	337	405	426
SL1344_RS07590	yneG	WP_000992449.1	CDS	1560423	1560782	+	164	152	190	538	636	631
SL1344_RS07595	SL1344_1457	WP_001670736.1	CDS	1561039	1561953	+	184	122	189	1483	1516	1569
SL1344_RS07600	SL1344_1458	WP_000513122.1	CDS	1562009	1562551	-	94	66	81	140	164	181
ncRNA0141	STnc170		sRNA	1562637	1562969	-	5	3	3	26	19	28
SL1344_RS07605	SL1344_1459	WP_000758335.1	CDS	1563268	1564386	+	445	270	528	530	605	574
ncRNA0390	SLnc1006		sRNA	1564399	1564512	+	537	262	567	558	681	628
SL1344_RS07610	hypA	WP_000544773.1	CDS	1564527	1564868	-	141	178	103	210	189	236
SL1344_RS07615	SL1344_1461	WP_001189401.1	CDS	1564881	1565768	-	436	457	348	566	648	621
SL1344_RS07620	hyaF2	WP_001016743.1	CDS	1565756	1566817	-	845	907	656	834	937	928
SL1344_RS07625	hyaE2	WP_000155978.1	CDS	1566835	1567245	-	339	370	238	267	305	311
SL1344_RS07630	SL1344_1464	WP_000334904.1	CDS	1567242	1567541	-	397	442	260	285	305	288
SL1344_RS07635	hyaD2	WP_000852664.1	CDS	1567541	1568149	-	946	1278	670	666	682	699
SL1344_RS07640	hyaC2	WP_000924456.1	CDS	1568155	1568898	-	1274	1635	775	736	839	826
SL1344_RS07645	hyaB2	WP_000331206.1	CDS	1568849	1570651	-	1757	2073	966	1020	1059	1068
ncRNA0287	STnc2175		sRNA	1568856	1568928	-	240	297	142	134	191	165
SL1344_RS07650	hyaA2	WP_001194448.1	CDS	1570654	1571757	-	1162	1339	575	466	594	509
SL1344_RS07655	SL1344_1469	WP_000976502.1	CDS	1572186	1573277	+	491	460	425	4182	4317	4736
SL1344_RS07660	SL1344_1470	WP_000236521.1	CDS	1573443	1574114	+	1024	1102	1195	883	955	1031
SL1344_RS07665	SL1344_1471	WP_000864924.1	CDS	1574173	1575198	-	954	815	745	1832	2311	2442
ncRNA0470	StyR-292		sRNA	1574607	1574644	+	2	0	0	5	8	7
SL1344_RS07670	SL1344_1472	WP_000824240.1	CDS	1575173	1576459	-	542	609	404	1427	1809	1834
SL1344_RS07675	pqaA	WP_001519903.1	CDS	1576636	1578126	-	156	199	124	3713	5221	4871
SL1344_RS07680	SL1344_1474	WP_001095738.1	CDS	1578262	1579503	-	68	51	67	793	1032	894
SL1344_RS07685	SL1344_1475	WP_000199411.1	CDS	1579493	1581001	-	129	101	127	109	147	166
SL1344_RS07690	SL1344_1476	WP_001293638.1	CDS	1581046	1581534	+	757	710	699	483	604	597
SL1344_RS07695	SL1344_1477	WP_000954688.1	CDS	1581727	1582806	+	264	350	181	9687	14628	14914
SL1344_RS07700	SL1344_1478	WP_000194089.1	CDS	1582858	1583247	-	475	446	410	833	808	905
SL1344_RS07705	SL1344_1479	WP_000221343.1	CDS	1583418	1583702	-	448	517	515	814	1069	1085
SL1344_RS07710	SL1344_1480	WP_000885424.1	CDS	1583692	1583940	-	333	356	448	489	681	698
SL1344_RS07715		WP_000206207.1	CDS	1584092	1584307	+	39	65	48	128	151	145
SL1344_RS07720	SL1344_1481	WP_000253154.1	CDS	1584297	1584629	+	45	67	47	130	176	175
ncRNA0124	sRNA25		sRNA	1584389	1584661	-	3	2	2	11	33	21
SL1344_RS07725	SL1344_1482	WP_001143649.1	CDS	1584751	1585680	+	119	152	99	411	558	589
SL1344_RS24740		WP_000113982.1	CDS	1585875	1586249	+	11	15	18	58	78	73
ncRNA0031	IsrF		sRNA	1586723	1587018	-	162	106	153	204	236	267
SL1344_RS07735		end_range=1586991,.	CDS	1586779	1586991	-	152	100	145	187	224	247
SL1344_RS07740	SL1344_1484	WP_000095226.1	CDS	1587258	1588721	-	1607	1097	1486	858	882	975
SL1344_RS07745	SL1344_1485	WP_000201080.1	CDS	1588983	1589990	+	344	231	307	322	339	357
SL1344_RS07750	SL1344_1486	WP_001276617.1	CDS	1590134	1591585	+	154	182	191	197	247	227
SL1344_RS07755	SL1344_1487	WP_000347159.1	CDS	1591598	1592800	+	338	300	362	386	395	463
SL1344_RS07760	SL1344_1488	WP_000210599.1	CDS	1592913	1594988	-	592	998	548	3356	3735	4956
SL1344_RS07765	SL1344_1489	WP_000613145.1	CDS	1595045	1597573	-	770	1021	486	4125	4351	5867
SL1344_RS07770	SL1344_1490	WP_000095534.1	CDS	1597570	1599354	-	578	741	315	3090	3253	4292
SL1344_RS07775	SL1344_1491	WP_000698598.1	CDS	1599483	1600268	-	141	240	94	747	861	1119
SL1344_RS07780	hdeB	WP_001032161.1	CDS	1600411	1600740	-	3660	3644	2766	659	662	774
SL1344_RS07785	osmC	WP_000152297.1	CDS	1601090	1601521	-	697	952	357	3927	4476	6024
SL1344_RS07790	yddX	WP_000495700.1	CDS	1602034	1602249	+	157	133	106	1794	1849	2753
SL1344_RS07795	rpsV	WP_000841559.1	CDS	1602344	1602487	+	6624	4177	3999	24376	23564	32198
SL1344_RS07800	sfcA	WP_000450511.1	CDS	1602664	1604361	+	8178	6520	7555	5756	5790	6656
SL1344_RS07805	adhP	WP_000642447.1	CDS	1604647	1605657	+	1689	2477	1473	4989	6309	7699
ncRNA0327	STnc3540		sRNA	1605698	1605912	-	2233	1881	1861	2365	2946	2698
SL1344_RS07810	fdnI	WP_000045657.1	CDS	1605748	1606404	-	3032	2381	2576	2492	3133	2890
SL1344_RS07815	fdnH	WP_000061599.1	CDS	1606397	1607281	-	977	653	828	79	142	123
SL1344_RS07820		WP_000181607.1	CDS	1607295	1609706	-	3439	3297	4459	445	587	522
SL1344_RS07825		WP_000383366.1	CDS	1609755	1610342	-	2226	2224	4015	230	284	237
SL1344_RS07830	yddG	WP_000203799.1	CDS	1610620	1611501	+	131	87	199	100	131	101
SL1344_RS07835	ompD	WP_000769035.1	CDS	1612026	1613114	+	320135	172940	403379	6887	7475	6619
SL1344_RS07840	SL1344_1504	WP_001519103.1	CDS	1613198	1613638	+	478	336	725	141	154	173
SL1344_RS07845	smvA	WP_000489731.1	CDS	1613663	1615150	-	520	356	287	548	643	702
SL1344_RS07850	SL1344_1506	WP_000121043.1	CDS	1615267	1615845	+	372	407	325	656	916	884
SL1344_RS07855	narU	WP_000198251.1	CDS	1616060	1617448	+	185	189	70	361	358	485
SL1344_RS07860	narZ	WP_000040398.1	CDS	1617540	1621280	+	502	835	286	890	1048	1305
SL1344_RS07865	narY	WP_000702596.1	CDS	1621277	1622821	+	184	349	178	372	455	605
SL1344_RS07870	narW	WP_001166296.1	CDS	1622821	1623516	+	78	151	76	191	243	315
SL1344_RS07875	narV	WP_000617106.1	CDS	1623513	1624193	+	89	165	87	266	345	431
SL1344_RS07880	yddE	WP_000804282.1	CDS	1624299	1625192	+	549	412	474	848	868	908
SL1344_RS07885	nhoA	WP_000200329.1	CDS	1625228	1626073	-	559	454	524	645	873	938
SL1344_RS07890	steA	WP_001147134.1	CDS	1626357	1626989	-	2802	4177	2611	18492	27218	26279
SL1344_RS07895	ansP	WP_000857101.1	CDS	1627502	1628995	+	480	323	670	786	1070	1033
SL1344_RS07900	SL1344_1516	WP_000732362.1	CDS	1629072	1629293	-	26	42	17	104	103	113
SL1344_RS07905	SL1344_1517	WP_000550636.1	CDS	1629438	1630499	-	286	182	228	17321	15033	19328
SL1344_RS07910	yncD	WP_000692042.1	CDS	1630763	1632883	+	612	664	437	1757	1799	2048
SL1344_RS07915	yncC	WP_001119592.1	CDS	1632950	1633615	-	118	209	57	1069	1026	1559
SL1344_RS07920	yncB	WP_001517827.1	CDS	1633949	1634986	-	1228	2041	820	4311	4995	6099
SL1344_RS07925	yncA	WP_000155373.1	CDS	1635198	1635713	+	849	771	766	513	492	582
SL1344_RS07930	ydcZ	WP_001076571.1	CDS	1635713	1636162	+	559	775	528	531	526	580
SL1344_RS07935	ydcY	WP_000018720.1	CDS	1636167	1636400	-	126	166	104	187	283	277
SL1344_RS07940	srfA	WP_001129948.1	CDS	1636624	1637943	+	2978	3050	3183	451	318	457
SL1344_RS07945	srfB	WP_000960833.1	CDS	1637948	1640929	+	4847	5502	4675	738	605	752
SL1344_RS07950	srfC	WP_000165648.1	CDS	1640926	1643070	+	3277	3644	3268	770	689	848
SL1344_RS07955		WP_000171943.1	CDS	1643115	1643288	-	18	15	37	187	177	178
[truncated: 3,494 more rows]

## Sheet: GSE117256_tpm
Locus_tag	Gene	Culture condition
		LB	LPM	Locus_tag
SL1344_RS23640	finO	29.0687	35.8452	SL1344_RS23640
SL1344_RS24690	sulII	586.126	582.769	SL1344_RS24690
SL1344_RS00005	thr operon leader peptide	1608.49	4696.34	SL1344_RS00005
SL1344_RS00010	thrA	13.2175	26.3187	SL1344_RS00010
SL1344_RS24205	repZ	25.5643	92.7031	SL1344_RS24205
SL1344_RS23645	traX	8.90433	13.5344	SL1344_RS23645
SL1344_RS24695	repC	70.9571	45.3882	SL1344_RS24695
SL1344_RS23650	traI	7.20969	14.5915	SL1344_RS23650
SL1344_RS24700	repA	89.0374	70.7776	SL1344_RS24700
SL1344_RS24210	yacA	78.3968	53.7211	SL1344_RS24210
SL1344_RS24215	yacB	83.7175	75.1041	SL1344_RS24215
SL1344_RS00015	thrB	31.482	355.786	SL1344_RS00015
SL1344_RS24705	SL1344_P3_0005	297.578	237.998	SL1344_RS24705
SL1344_RS24220	yacC	59.504	74.8847	SL1344_RS24220
SL1344_RS24710	SL1344_P3_0006	250.752	176.35	SL1344_RS24710
SL1344_RS24715	mobA	41.4952	30.932	SL1344_RS24715
SL1344_RS00020	thrC	40.9904	274.988	SL1344_RS00020
SL1344_RS24225	yadA	28.7342	39.6789	SL1344_RS24225
SL1344_RS24230	yaeB	27.8135	56.849	SL1344_RS24230
ncRNA0491	RUF_107c.105	67.5078	386.567	ncRNA0491
SL1344_RS00025	yaaA	55.3111	80.0777	SL1344_RS00025
SL1344_RS24235	yafA	26.1755	50.6935	SL1344_RS24235
SL1344_RS24720	mobC	46.6064	36.5718	SL1344_RS24720
SL1344_RS24240	yafB	41.8892	47.2757	SL1344_RS24240
SL1344_RS00030	yaaJ	14.961	69.2489	SL1344_RS00030
ncRNA0472	StyR-295	2.67593	5.55391	ncRNA0472
SL1344_RS24725		10.5963	21.0018	SL1344_RS24725
SL1344_RS24245	yagA	35.4088	25.618	SL1344_RS24245
SL1344_RS23655		66.3118	65.6772	SL1344_RS23655
SL1344_RS23660		56.8042	63.7539	SL1344_RS23660
SL1344_RS24730	strB	151.918	198.339	SL1344_RS24730
SL1344_RS23665	traD	2.38319	4.41346	SL1344_RS23665
SL1344_RS00035	talB	657.375	408.516	SL1344_RS00035
SL1344_RS24735	aph(3'')-Ib	555.152	579.26	SL1344_RS24735
SL1344_RS24250	cib	43.3676	479.114	SL1344_RS24250
SL1344_RS00040	mog	73.8665	32.1448	SL1344_RS00040
SL1344_RS00045	yaaH	11.1165	10.2071	SL1344_RS00045
SL1344_RS23670	traT	517.105	553.72	SL1344_RS23670
SL1344_RS00050	htgA	0.82224	3.90745	SL1344_RS00050
SL1344_RS24255	imm	8.23335	77.9914	SL1344_RS24255
SL1344_RS24260		5.71099	44.7842	SL1344_RS24260
SL1344_RS23675	traS	200.642	182.415	SL1344_RS23675
SL1344_RS00055	yaaI	1.63508	6.73979	SL1344_RS00055
SL1344_RS24265		23.7218	15.0624	SL1344_RS24265
SL1344_RS23680	traG	14.2379	22.5501	SL1344_RS23680
SL1344_RS00060	dnaK	991.444	534.409	SL1344_RS00060
SL1344_RS24270		23.2153	15.2687	SL1344_RS24270
SL1344_RS24275	ybfA	13.1155	11.3131	SL1344_RS24275
SL1344_RS24280	resA	11.7704	9.01844	SL1344_RS24280
ncRNA0097	tpke11	4069.84	1890.1	ncRNA0097
SL1344_RS00065	dnaJ	117.166	103.038	SL1344_RS00065
SL1344_RS23685	traH	4.63643	7.84671	SL1344_RS23685
SL1344_RS24285	parA	74.3666	61.6531	SL1344_RS24285
ncRNA0208	STnc890	99.8599	76.4576	ncRNA0208
SL1344_RS24290	SL1344_P2_0020	77.9793	92.8728	SL1344_RS24290
SL1344_RS00070	SL1344_0014	2.67682	10.1426	SL1344_RS00070
SL1344_RS23690	trbB	5.78603	10.2399	SL1344_RS23690
SL1344_RS24295	stbA	52.3998	82.5217	SL1344_RS24295
SL1344_RS23695	traQ	6.39717	14.0609	SL1344_RS23695
SL1344_RS00075	SL1344_0015	0.960133	1.35364	SL1344_RS00075
SL1344_RS23700	traF	3.69312	7.99777	SL1344_RS23700
ncRNA0305	STnc3200	3.09643	5.75487	ncRNA0305
SL1344_RS24300	stbB	54.5983	160.244	SL1344_RS24300
SL1344_RS00080	SL1344_0016	0.960494	2.10266	SL1344_RS00080
SL1344_RS24305		40.5477	49.5149	SL1344_RS24305
ncRNA0306	STnc3210	1.24817	31.9367	ncRNA0306
[truncated: 5,427 more rows]

## Sheet: SPI-2summary
gene	OD0.3	OD2.0	LB	LPM
[truncated: 18 more rows]
